# Supplementary material for: Genome-wide identification and characterization of LRR-RLKs reveal functional conservation of the SIF subfamily in cotton (Gossypium hirsutum)
Source: PubMed Central journal article supplement (PMC6128003; doi:10.1186/s12870-018-1395-1), 2018-09-06
Supplement: 12870_2018_1395_MOESM2_ESM.pdf [file 12870_2018_1395_MOESM2_ESM.pdf]

|             |                                                             |    |
|-------------|-------------------------------------------------------------|----|
| CotAD_57195 | -----MVSFTQFCILYFYFIASVVS-QVSEFISIDCGS---TSNYTDPSTGLS       | 44 |
| CotAD_44233 | -----MEMEKRLLFSLLLFSLLLLLDSSSA-QMQGFVSLNCGG---DGNFTDE-LGLL  | 48 |
| CotAD_52119 | -----MEMEKRLLFSLLLFSLLLLLDSSSA-QMQGFVSLNCGG---DGNFTDE-LGLS  | 48 |
| CotAD_74481 | -----                                                       | 0  |
| CotAD_21855 | -----                                                       | 0  |
| CotAD_74959 | -----                                                       | 0  |
| AtSIF3      | -----MESH-RVAVAT--F--MLILHLVQAQDQPGFINVDCGLLPRDSPYNALGTGLV  | 48 |
| AtSIF1      | MWTVRRTERH-CVFVTI--F--VLILHLVQAQNTGFIISVDCGLSPPESPYNAPQTGLT | 55 |
| AtSIF2      | -----MERH-CVLVAT--F--LLMLHIVHAQDQIGFISVDCGLAPRESPYNEAKTGLT  | 48 |
| AtSIF4      | -----MERH-FVFIAT--Y--LLIFHLVQAQNTGFIISVDCGLSLLLESPYDAPQTGLT | 48 |
| CotAD_41732 | -----MEKTKHYFIILFII--FTLAVVVHAQNTGFIISLDCGL-PAGSSYIDSITGIN  | 50 |
| CotAD_31444 | -----MFVGYLTPLL--LSLAVLVHGQLQTGFISIDCGS-PVNFNFVDVDTGIS      | 46 |
| CotAD_06671 | -----MFFGYLTPLL--LSLAVLVHGQLQT-----DVDVTGIS                 | 30 |

|             |                                                              |     |
|-------------|--------------------------------------------------------------|-----|
| CotAD_57195 | WSSDMDIMKHGRQVKVENPN---G--NSMQFRTRRDFPSDNKKYCYNLST--KERRRYL  | 96  |
| CotAD_44233 | WSSD-DFLNYGETASISVSN---E--TRQQYMSLRHFPADSKKYCYKLN--VSRTRYL   | 99  |
| CotAD_52119 | WSSD-YFLNYGETASISVSN---E--TRQQYMSLRHFPADSKKYCYKLN--VSRTRYL   | 99  |
| CotAD_74481 | -----MKNCYTLKLEQATNNSFR                                      | 18  |
| CotAD_21855 | -----                                                        | 0   |
| CotAD_74959 | -----                                                        | 0   |
| AtSIF3      | YTSVGLVSSGKTGKIAKEF----EENSTPNLTLRYFPD-GARNCYNLNV--SRDTNYM   | 101 |
| AtSIF1      | YTSDTGLINTGKTGRIAKDF----EPFVDKPALTMRYFPD-GIRNCYNLNV--TRDTNYL | 108 |
| AtSIF2      | YTSDDGLVNVGKPGRIAKEF----EPLADKPTLTLRYFPE-GVRNCYNLNV--TSDTNYL | 101 |
| AtSIF4      | YTSADLVASGKTGRLAKEF----EPLVDKPTLTLRYFPE-GVRNCYNLNV--TSDTNYL  | 101 |
| CotAD_41732 | YTSDEPYIQTGTHSLSRFN----SSIQQFLENLRSFPQ-GVRHCYQLNL--TKGEKYL   | 103 |
| CotAD_31444 | YTPDGAYVSTGINNNISSEYAYPNNPNLAYPLSLDRSFPD-GNKNCYTLTPAAAKGSLYL | 105 |
| CotAD_06671 | YTLDGAYVSTGINNNISSEYAYPNNPNLAYPLSLDRSFPD-GNKNCYTLTPAAAKGSLYL | 89  |

|             |                                                              |     |
|-------------|--------------------------------------------------------------|-----|
| CotAD_57195 | VRATFQYGSPANVDAYPKFEIYLDATQWATVTIQDGSRKYNEMIIRAPSDSIDVICCA   | 156 |
| CotAD_44233 | VRATFLYGNFDNNVYPKFDISLGATHWSTIVISDANTIEKAELIFLATSPTISVCLNSA  | 159 |
| CotAD_52119 | VRATFLYGNFDNNVYPKFDISLGATHWSTIVISDANTIEKAELIFLATSPTISVCLNSA  | 159 |
| CotAD_74481 | IRASFAYGNYDRKNKIPKFDLYLGVNYWTTVNLTN-FEGFFYEIIHVFAPDTEYVCLANT | 77  |
| CotAD_21855 | -----                                                        | 0   |
| CotAD_74959 | -----                                                        | 0   |
| AtSIF3      | IKATFVYGNVDGHKDEPNFDLYLGNLWATVSR----ETVEEIIHVTKSDSLQVCLAKT   | 157 |
| AtSIF1      | IKATFVYGNVDGLNVDPNFDLYLGNLWTTVSSN----DTTEEIIHVTKFNSLQICLVKT  | 164 |
| AtSIF2      | IKATFVYGNVDGLNVGNPNFDLYFGPNLWTTVSSN----DTIKEIIHVTKNSLQVCLIKT | 157 |
| AtSIF4      | IKATFVYGNVDGLNVGNPNFNLYLGNLWTTVSSN----DTIEEIIIVTRNSLQVCLVKT  | 157 |
| CotAD_41732 | IRASFMYGNVDENDENPEFDLYLGNLWASVMFENSTSVVVKIYVVKARYLHVCVVNT    | 163 |
| CotAD_31444 | LRAFVYGNVDGEDKLPEFDLYLDANLWSSIKFGNAFDVITTEIISASVSDTISVCLVNK  | 165 |
| CotAD_06671 | LRAFVYGNVDGEDKLPEFDLYLDVNLWSSIKFSNASDVITMKIIGASVSDTISVCLVNK  | 149 |

|             |                                                                |     |
|-------------|----------------------------------------------------------------|-----|
| CotAD_57195 | TTGFPFISTLELRPLNLSMYATDYEGDFFLNVAARVNFALTKDLVRYPPDDPYDRFWESD   | 216 |
| CotAD_44233 | TTGQPFISTLELRQFNNGSIYYTPFEENFYLGVSARINFGADSEAPVRYPPDDPFDRIWESD | 219 |
| CotAD_52119 | TTGQPFISTLELRQFNNGSIYYTPFEENFYLGVSARINFGADSEAPVRYPPDDPFDRIWESD | 219 |
| CotAD_74481 | GTGTPFISALEIRPSNISTYGNSSLELINIGLYDLSSYPGQSPGVRYKDDIYDRVWYPS    | 137 |
| CotAD_21855 | -----                                                          | 0   |
| CotAD_74959 | -----                                                          | 0   |
| AtSIF3      | GDFIPFINILELRPLKKNVYVTESGSL---KLLFRKYFS-DSGQTIRYPDDIYDRVWHAS   | 213 |
| AtSIF1      | GISIPFINVLELRPLKKNVYATQSGSL---KYLFRMYVS-NSSRRIRFPDDVYDRKWYPI   | 220 |
| AtSIF2      | GISIPFINVLELRPMKKNMYVTQGESL---NYLFRVYIS-NSSTRIRFPDDVYDRKWYPY   | 213 |
| AtSIF4      | GISIPFINMLELRPMKKNMYVTQSGSL---KYLFRGYIS-NSSTRIRFPDDVYDRKWYPL   | 213 |
| CotAD_41732 | GKGIPFISALESRLLSNVTYNTDSNTQ-ALEFFLRIDFGSALNSSFRFPEDIYDRIWQPY   | 222 |
| CotAD_31444 | GLGIPFISALELRPLNNSIYGTELGSPVSLVLFERFDIGYT-KGTGRYNDIYDRIWSPY    | 224 |
| CotAD_06671 | GLGIPFISTLELRPLNNSIYGTELGSLVSLVLFERFDIEYT-NGTGRYNDIYDRIWSPY    | 208 |

|             |                                                                |     |
|-------------|----------------------------------------------------------------|-----|
| CotAD_57195 | LDRRQNFLVGVAPGTARISTSKNVD--I-RTREYPPVKVMQTAVVGTGEGELSYR--LNLE  | 271 |
| CotAD_44233 | SLKRANYLVDVAAGTVKVVSTNKSIIY--I-SSSEMPPEKVMQTAVVGTNGSLTYR--LNLD | 274 |
| CotAD_52119 | SLKRANYLVDVAAGTVKVVSTNKSIIY--I-SSSEMPPEKVMQTAVVGTNGSLTYR--LNLD | 274 |
| CotAD_74481 | QLPRS-----VPINTSSDIDTQSGNLYKLPVEVLRRTAVRPFNGSNSLSYSSSFA        | 187 |
| CotAD_21855 | -----                                                          | 0   |
| CotAD_74959 | -----                                                          | 0   |
| AtSIF3      | FLENN-----WAQVSTTLGVN--V-TDNYDLSQDVMATGATPLNDSETLNITWVNE       | 261 |
| AtSIF1      | -FQNS-----WTQVTTNLNVN--I-STIYELPQSVMAAATPLNANATLNITWTIE        | 267 |
| AtSIF2      | -FDNS-----WTQVTTTLQVNVN--T-SITYELPQSVMAAATPIKANDTLNITWTV       | 260 |
| AtSIF4      | -FDDS-----WTQVTTNLNVN--T-SITYELPQSVMAAATPIKANDTLNITWTV         | 260 |
| CotAD_41732 | -RRND-----LTTINSSSLI--S-NSYFDPPLVAMMTASIPMNGSQSLNFTVRDS        | 269 |
| CotAD_31444 | -NSPS-----WNIVSTSEIN--NNENGYRAPLEVIRTAAPRNGSDRLEFSWTAD         | 272 |
| CotAD_06671 | -NSPS-----WNIVSTSEIN--NNENGYRAPLEVIRTSAPRNGSDRLEFSWTAD         | 256 |

|             |                                                              |     |
|-------------|--------------------------------------------------------------|-----|
| CotAD_57195 | GFPANARAYAYFAEIEDLAPNETRKFQLREPIYPDYSNAVVNIAENANGSYTLYEPSYMN | 331 |
| CotAD_44233 | GFPFGWAFTYFAEIEDLAPDESRRKFRLLVLPQDPDLKAVVNIQENAQGKYRVYEPGYPN | 334 |
| CotAD_52119 | GFPFGWAFTYFAEIEDLAPDESRRKFRLLVLPQDPDLKAVVNIQENAQGKYRVYEPGYPN | 334 |
| CotAD_74481 | -SSYDYNLYFHFAELEFF-EDKQREISITVNGI-T-----QGPFTLEYLK           | 229 |
| CotAD_21855 | -----                                                        | 0   |
| CotAD_74959 | -----                                                        | 0   |
| AtSIF3      | PPTTKVYSYMHFAELETLRANDTREFNVLNGNDL-----FGPYSPIPLK            | 306 |
| AtSIF1      | PPTTFYSYIHFAELQSLRANDTREFNVTLNGEYT-----IGPYSPKPLK            | 312 |
| AtSIF2      | PPTTKFYSYMHFAELQTLRANDAREFNVTMNGIYT-----YGPYSPKPLK           | 305 |
| AtSIF4      | PPTTQFYSYVHIAEIQALRANETREFNVTLNGEYT-----FGPFSPKPLK           | 305 |
| CotAD_41732 | DPDVEFYFYMHVVELEELQANQTREFNIYLNDFW-----YGPFSPLYLQ            | 314 |
| CotAD_31444 | DDASKFYVYMYFAEVQ-LAKNQTRKFNISWNGSLM-----FGPLVPRYLF           | 316 |
| CotAD_06671 | DDASKFYVYMYFAEVQQLAKNQTRKFNISWNGSLI-----FGPLVPRYLF           | 301 |

|             |                                                                |     |
|-------------|----------------------------------------------------------------|-----|
| CotAD_57195 | V-----TLDFVLSFTFSKTNSTEGPLLNNAMEISKYQQIAA-KTERQDVTALNAI        | 380 |
| CotAD_44233 | I-----SLPFVLSFRFGKTSOSSKGPLLNNAIEINRYLEKND-GSV--DGMVIANV       | 381 |
| CotAD_52119 | I-----SLPFVLSFRFGKTSOSSKGPLLNNAIEINRYLEKND-GSV--DGMVIANV       | 381 |
| CotAD_74481 | PLSISFQRLR-TVEGNITFTISTTMESGLPILNALEYQKQFTDSATDPSDVNAIMSI      | 288 |
| CotAD_21855 | -----MESGLPILNALEYQKQFTDSTTDPDA-----                           | 30  |
| CotAD_74959 | -----MESGLPILNALEYLLEQFTDAAADPSDG-----                         | 30  |
| AtSIF3      | TETETNLKPEECEDGACILQLVKTSKSTLPPLLNNAIEAFTVIDFLQVETDEDDAAAIAIKV | 366 |
| AtSIF1      | TETIQDLSPEQCNGGACILQLVETLKSTLPPLLNNAIEAFTVIDFPQMETNEDDVTGINDV  | 372 |
| AtSIF2      | TETIYDKIPEQCDDGACLLQVVKTLKSTLPPLLNNAIEAFTVIDFPQMETNGDDVDAIKV   | 365 |
| AtSIF4      | TASIVDLSPGQCDGGRICLQVVKTLKSTLPPLLNNAIEAFTVIDFPQMETNENDVAGIKV   | 365 |
| CotAD_41732 | GETILS--SLSVKGQ--FSMESTRSSTHPIINAFEAYKVKELVESQTVETEVNAMMNI     | 370 |
| CotAD_31444 | AATISN--SEAFTEGKEHHISYKTV DANLPILNAVEIYMAKQLDELPTFSEDVA AVLNI  | 374 |
| CotAD_06671 | AATILN--SEAFTEGKEHHISYKTADANLPILNAIEVYMAKQLDELPTLSEDVA AVVNI   | 359 |

.: \*:\*:\* : :

|             |                                                               |     |
|-------------|---------------------------------------------------------------|-----|
| CotAD_57195 | RNMSAESVWVNEGGDPCVPTHWEW--NCSPT---PPPRITKIALSGRNKLGQIPSEINH   | 435 |
| CotAD_44233 | VALYPSADWAQEGGDPCLPVPWSWV--RCNSD---RQPKIVSILLSSQNL TGNIPSEFTK | 436 |
| CotAD_52119 | VALYPSADWAQEGGDPCLPVPWSWV--QCNSD---RQPKIVSILLSSKNL TGNIPSDFTK | 436 |
| CotAD_74481 | KHTY---NRDDWQGDPCPKGYSWGLSCHFG---SPPRIISLNLSSSKLTGEISPSLAH    | 342 |
| CotAD_21855 | --YI---NRDDWQGDPCPKGYSWGLSCYFG---IPPRIISLNLSSSKLTGEISPSLAH    | 82  |
| CotAD_74959 | --TL---LFD-----SG---TPHLILCRNLSSSKLTGEISPSLAH                 | 62  |
| AtSIF3      | QNAYGLINRSSWQGDPCVVKQYSWDGLKCSYSD-STPPIINFLDLSASGLTGIAPAIQN   | 425 |
| AtSIF1      | QNTYGL-NRISWQGDPCVVKQYSWDGLNCSNDSIPPIISLDLSSSGLNGVITQGIQN     | 431 |
| AtSIF2      | QD TYGI-SRISWQGDPCVVKLFLWDGLNCSNDSNSTSPIITSLDLSSSGLTGSITQAIQN | 424 |
| AtSIF4      | QGT YGL-SRISWQGDPCVVKQLLWDGLNCSNDSNSTSPIITSLDLSSSGLTGIITQAIKN | 424 |
| CotAD_41732 | KSMYRL--KKNWEGDPCAPRTYSWEGLDCSYDD-LDPRIISLNLSSSGLSGEISPYIGN   | 427 |
| CotAD_31444 | KTAYQV--NKGWVGDPGPKNYTWEGLECNYSV-SLPPRIISLNL TSSGLSGIISASFAN  | 431 |
| CotAD_06671 | RTAYQV--NKGWVGDPGPKNYTWEGLECNYSV-SLPPRIISLNL TSSGLSGIISASFAN  | 416 |

\* \*:. \*.\* \* : :

|             |                                                             |     |
|-------------|-------------------------------------------------------------|-----|
| CotAD_57195 | FSGEIPAALLSKK----ISFNIEGNPG----LH-----NEAQRKLRFK-LILGAS     | 536 |
| CotAD_44233 | LTGRVPSGLLSKN----LALNYAGNIN----LH-----EGGGRAKHLSTIIVGSS     | 538 |
| CotAD_52119 | LTGRVPSGLLSKN----LALNYAGNIN----LH-----EGGG--KHLSTIIVGSS     | 536 |
| CotAD_74481 | LKGPQPQLKDKSDHGSLLSFDENQTSCHRDPCG-----NSKKFI-VPVVVS         | 403 |
| CotAD_21855 | LKGPQPQLKDKSDHGSLLSFDENQTSQRDHCEG-----NSKKFI-VPVVVS         | 167 |
| CotAD_74959 | LKGPQPQLKDKSDHGSLLSLDENQTSQRDPCEG-----NRKKFI-VPVVVS         | 147 |
| AtSIF3      | LSGPVPASLLQKKG---LMLHLDDNP---HILCTTGSCMHKGE--EKKSI-VPVVAS   | 512 |
| AtSIF1      | LTGSVPLSLLQKKG---LKL NVEGNP---HLLCTDGLCVNKG-DGHKKSII-APVVAS | 519 |
| AtSIF2      | LSGSVPPSLLQKKG---MKLNVEGNP---HLLCTADSCVKKGEDGHKKSIVI-VPVVAS | 513 |
| AtSIF4      | LSGSVPPSLLQKKG---MKLNVEGNP---HILCTTGSCVKKKEDGHKKSIVI-VPVVAS | 513 |
| CotAD_41732 | LNGSVPAGLIDRINRRFLQLNVEGNQIPCTWEPCTTGTKT-----SENSV-VTVVAS   | 516 |
| CotAD_31444 | LSGSVPTLVDRSKAGLLTLRVDEQN-----LCSSGSK-----NKKNVV-VPVVAS     | 514 |
| CotAD_06671 | -----VDEQN-----LCSSGSK-----NKKNVV-VPVVAS                    | 472 |

: . : \*

|             |                                                               |     |
|-------------|---------------------------------------------------------------|-----|
| CotAD_57195 | MEELTELWLDFNLSLTGPLPDMSNLINLEILHLENNKLSGSLPLYLGRPLNLQALYIQNNS | 495 |
| CotAD_44233 | LSGLVELWLDGNSLTGPIPDFTGCVDLRIIHLLENNHLTGELPSSLMNLPNLRELYVQNNM | 496 |
| CotAD_52119 | LSGLVELWLDGNSLTGPIPDFTGCVDLRIIHLLENNHLTGELPSSLMNLPNLRELYVQNNM | 496 |
| CotAD_74481 | LL-----ELQS-----INISGNK                                       | 355 |
| CotAD_21855 | LL-----ELESIDLSDYNDLTGSVPDVLATLPKLSLNISGNK                    | 119 |
| CotAD_74959 | LL-----ELESIDLSDYNDLTGSVPDVLATLPKLSLNISGNK                    | 99  |
| AtSIF3      | LT-----HLEILALSNNL TGEVPEFLADLKSIMVIDLRGNN                    | 462 |
| AtSIF1      | LT-----HLQYLDLSDNNLTGDIPKFLADIQSLLVINLSGNN                    | 468 |
| AtSIF2      | LT-----NLQELDLSDDNLTGEIPDFLGDIKSLLVINLSGNN                    | 461 |
| AtSIF4      | LT-----HLQILDLSDDNLTGEVPEFLADIKSLLVINLSGNN                    | 461 |
| CotAD_41732 | LT-----QLQYLDLSNNLTGGVPEFLTQLQFLTLINLQGNA                     | 464 |
| CotAD_31444 | IT-----SMESLDLSNNHLSGPVPEFLKELKSLKFMNLEGNQ                    | 468 |
| CotAD_06671 | IS-----SMESLDLSNNHLSGPVPEFLKELKSLNFL-----                     | 447 |
|             | : . :                                                         |     |

|             |                                                              |     |
|-------------|--------------------------------------------------------------|-----|
| CotAD_57195 | IGVLAVLLILFLGSLILLRNFRRKMSHQKCDENGNSTQPGTKQSTACSIARGGHLLDEGV | 596 |
| CotAD_44233 | VGAFFLLISTILSCIILRKG-KKKHEQEQF----HHPLPIQGQRIA----SSLSNAPTEA | 589 |
| CotAD_52119 | VGAFFLLISTILSCIILRKG-KKKHEQEQF----HHPLPIQGQRIA----SSLSNAPTEA | 587 |
| CotAD_74481 | IIAAVAL--VI--LLSVLFIHFRKRKRK-QTE----VV-----NNTTASNKEEFLKSK   | 447 |
| CotAD_21855 | IIAAVAL--VI--LLSVLFIHFRKRKRK-QTE----VV-----NNTTASNKEEFLKSK   | 211 |
| CotAD_74959 | IIAAVAL--VI--LLSVLFIHFRKRKRK-QTE----VV-----NNTIASNKEGFLKSK   | 191 |
| AtSIF3      | IVSLAVI--I--GALILFLVFRKKKAS-KVE----GTLPSYMQASDGRSPRSSEPAIVTK | 563 |
| AtSIF1      | IASIAIL--I--GALVLFVFLKKT---QSK----GPPAAYVQASNGRRSRAEPAIVTK   | 568 |
| AtSIF2      | IASIAVL--I--GALVLFVFLKKTSP-KVE----GPPPSYMQASDGRSPRSSEPAIVTK  | 564 |
| AtSIF4      | IASIAVL--I--GALVLFVFLKKTSP-KVE----GPPPSYMQASDGRSPRSSEPAIVTK  | 564 |
| CotAD_41732 | VASVLSV--VIIVSALLWVFRKRIKTSK-KLV----LTP-----RKLQELK          | 555 |
| CotAD_31444 | LLSALVL--C-IALIILWRLRRKQKWE-ADT----SNG-----EGRPLPSK          | 552 |
| CotAD_06671 | LLSALVL--C-VALIMLWRLRRKQKSE-ADT----SNG-----EGRPLPSK          | 510 |
|             | : : :* : :                                                   |     |

|             |                                                                |     |
|-------------|----------------------------------------------------------------|-----|
| CotAD_57195 | AYCISLSDLEEATNNTFKKIGKSGFSGVYGYGKMKDGKEVAVKTMADSSSHLNKQFVTEVA  | 656 |
| CotAD_44233 | ANCFTLPEIEDATNNTFEKKIGSGGFVYGYGKMKDGKEIIVKVLTSNSFQGKREFTNEVS   | 649 |
| CotAD_52119 | ANCFTLPEIEDATNNTFEKKIGSGGFVYGYGKMKDGKEIIVKVLTSNSFQGKREFTNEVS   | 647 |
| CotAD_74481 | NQPFTYSEIVTITANFKTGIGEGGFVKVFGHGLNDGTPVAVKLLSSSSKQGYKEFQAEAQ   | 507 |
| CotAD_21855 | NQPFTYSEIVTITANFKTGIGEGGFVKVFGHGLNDGTPVAVKLLSSSSKQGYKEFQAEAQ   | 271 |
| CotAD_74959 | NQPFTYSEIVTITANFKTGIGEGGFVKVFGHGLNDGTPVAVKLLSSSSKQGYKEFQAEVR   | 251 |
| AtSIF3      | NKRFTYSQVIMTNNFQRILGKGGFGIVYHGFVNGVEQVAVKILSHSSSQGYKQFKA EVE   | 623 |
| AtSIF1      | NKRFTYSEVMQMTNNFQRVILGKGGFGIVYHGLVNGTEQVAVKILSHSSSQGYKQFKA EVE | 628 |
| AtSIF2      | NRFTYSQVAIMTNNFQRILGKGGFGMVYHGFVNGTEQVAVKILSHSSSQGYKQFKA EVE   | 624 |
| AtSIF4      | NRFTYSQVIMTNNFQRILGKGGFGMVYHGFVNGTEQVAVKILSHSSSQGYKQFKA EVE    | 624 |
| CotAD_41732 | NRQFTYSDIQRITNNTFEKVIGKGGFGTVYHGFVLD-DNQVAVKMLSKTSFQGYKQFEAEVE | 614 |
| CotAD_31444 | NRQFTYAEVLNITNNTQDVIGKGGFGTVFRGNMKDGTQVAVKMLSTSSKQGSKEFQAEAE   | 612 |
| CotAD_06671 | NRQFTYAEVLNITNNTQDVIGKGGFGTVFRGNMKDETQVAVKMFSTSSKQGLKEFQAEAE   | 570 |
|             | : : * * * : * . * * * : * : . : * * : : * *                    |     |

|             |                                                               |     |
|-------------|---------------------------------------------------------------|-----|
| CotAD_57195 | LLSRIHHRNLVPLIGYCEEAHQRILVY EYMHNGLTRDHIH---GSVN-QKPLDWLARLKI | 712 |
| CotAD_44233 | LLSRIHHRNLVQFLGYCQEDGRSMLVYEFMHNGLKEHLY---GPLTRERGIWIKRLEI    | 706 |
| CotAD_52119 | LLSRIHHRNLVQFLGYCQEDGRSMLVYEFMHNGLKEHLY---GPLTRERGISWIKRLEI   | 704 |
| CotAD_74481 | SLMIVHHKNLVSLI-----ATK-TTVLNWNQRLQI                           | 536 |
| CotAD_21855 | SLMIVHHKNLVSLIGYCKEDDHMALVYEFMSNGNLRQHLCMDDATN-TTVLNWNQRLQI   | 330 |
| CotAD_74959 | CVAELERGGSERFS-----VVT-----                                   | 268 |
| AtSIF3      | LLLRVHHKNLVGLVGYCDEGENMALIYEYMANGDLKEHMS---GTRN-RFILNWETRLKI  | 679 |
| AtSIF1      | LLLRVHHKNLVGLVGYCDEGENLALIYEYMANGDLKEHMS---GTRN-HFILNWGTRLKI  | 684 |
| AtSIF2      | LLLRVHHKNLVGLVGYCDEGENMALIYEYMANGDLKEHMS---GTRN-RFTLNWGTRLKI  | 680 |
| AtSIF4      | LLLRVHHKNLVGLVGYCDEGNLALIYEYMANGDLKEHMS---GTRN-RFILNWGTRLKI   | 680 |
| CotAD_41732 | LLLRVHHRNLTALIGYDDGTETGLIYEFMAEGNLAEYLS---DSS--ISVLNWEGR LGI  | 669 |
| CotAD_31444 | LLMRVHHRNLASFICYCDEGSNMALIYEYMANGNLDYLS---YKS--SNPLSWEMRLRI   | 667 |
| CotAD_06671 | LLMRVHHRNLASLIGYCDEGSNMALIYEYMANGNF EGL-----                  | 608 |

: :. : . :

|             |                                                               |     |
|-------------|---------------------------------------------------------------|-----|
| CotAD_57195 | AEDAAKGLEYLHTGCNPSIIHRDVKTSNILLDINMRAKVSDFGLSRQAE-EDLTH-VSSV  | 770 |
| CotAD_44233 | AEDAAKGLEYLHTGCIPAIHHRDLKTSNILLDKHMRKVSDFGLSKLAV-DGASH-VSSI   | 764 |
| CotAD_52119 | AEDAAKGLEYLHTGCIPAIHHRDLKTSNILLDKHMRKVSDFGLSKLAV-DGASH-VSSI   | 762 |
| CotAD_74481 | AVDAAQGLDYLHNGCKPPIVHRDLKPSNILLTENMQAKIADFGLSRAFSMDTSTSSISTA  | 596 |
| CotAD_21855 | AADAAQGLDYLHNGCKPPIVHRDLKPSNILLTENMRAKIADFGLSRAFSMDTSTSSISTT  | 390 |
| CotAD_74959 | -----                                                         | 268 |
| AtSIF3      | VIDSAQGLEYLHNGCKPLMVHRDVKTNNILLNEHFQAKLADFGLSRSFPIGGETH-VSTV  | 738 |
| AtSIF1      | VVESAQGLEYLHNGCKPLMVHRDIKTTNILLNEQFDQAKLADFGLSRSFPIEGETH-VSTA | 743 |
| AtSIF2      | VVESAQGLEYLHNGCKPPMVHRDVKTNNILLNEHFQAKLADFGLSRSFPIEGETH-VSTV  | 739 |
| AtSIF4      | VIESAQGLEYLHNGCKPPMVHRDVKTNNILLNEHFQAKLADFGLSRSFLIEGETH-VSTV  | 739 |
| CotAD_41732 | ALEAAQGLEYLHNGCKPPIIHRDVKSSNILLTDNLQAKLSDFGLSKSFEFGSHVS---TV  | 726 |
| CotAD_31444 | AIHAAQGLEYLHNGCKPPIIHRDVKTANILLSENMDAKIADFGLSRAIPSDHSDVIITT   | 727 |
| CotAD_06671 | -----SLIDVKTANILLSEKMDAKIADFGLSRAIPSDHSDVIITT                 | 649 |

|             |                                                                |     |
|-------------|----------------------------------------------------------------|-----|
| CotAD_57195 | ARGTVGYLDPEYYASQQLTEKSDVYSFGVLLLELISGKPKVSVDFGPE-LNIVHWARSL    | 829 |
| CotAD_44233 | VRGTVGYLDPEYYISQQLTDKSDVYSFGVILLELMSGQEASNESFGVNCRNIVQAKLH     | 824 |
| CotAD_52119 | VRGTVGYLDPEYYISQQLTDKSDVYSFGVILLELMSGQEASNESFGVNCRNIVQAKLH     | 822 |
| CotAD_74481 | LAGTPGYIDPELHASGTLNKKSDVYSFGIILFELITVLPVQITNT--EHIMHIVDWVTPM   | 654 |
| CotAD_21855 | LAGTPGYIDPELHASGTLNKKSDVYSFGIILFELITGLSVQIKNT--ERIMHIVEWVTPM   | 448 |
| CotAD_74959 | -----                                                          | 268 |
| AtSIF3      | VAGTPGYLDPEYKTNRLTEKSDVYSFGIVLLEMITNRPVIDQ-S--REKPYISEWVGIM    | 795 |
| AtSIF1      | VAGTPGYLDPEYRTNWLTEKSDVYSFGVLLLEIITNQPVIDP-R--REKPHIAEWVGEV    | 800 |
| AtSIF2      | VAGTPGYLDPEYKTNWLTEKSDVYSFGIVLLELITNRPVIDK-S--REKPHIAEWVGM     | 796 |
| AtSIF4      | VAGTPGYLDPEYHRTNWLTEKSDVYSFGILLLEIITNRHVIDQ-S--REKPHIGEWVGM    | 796 |
| CotAD_41732 | IAGTPGYLDPEYSTTNRLTEKSDVYSFGVLLLEIITNRPVIARTI--DEPTHISRWV GSM  | 784 |
| CotAD_31444 | VMGTPGYLDPEYNSRKLNEKSDVVSFGIVLLELITGQNAVIK-K--DESIHIVNWV SPL   | 784 |
| CotAD_06671 | VMGTAGYLDPEYFNSRKLNEKSDVVS LGIVSLELITGQNAIIK-K--DESIHIVHWV SPL | 706 |

|             |                                                               |     |
|-------------|---------------------------------------------------------------|-----|
| CotAD_57195 | IRKGDVISIVDPFLVGNVKIESIWRIAIEVAIQCVEQHGYSRPMQEIILAIQDAMKIEKG  | 889 |
| CotAD_44233 | IESGDIQGIIDPYLRNDYDIQSMWKIAEKALNCVQPHGHMRPSISEVLKEIQDAILIEKE  | 884 |
| CotAD_52119 | IESGDIQGIIDPYLRNDYDIQSMWKIAEKALNCVQPHGHMRPSISEVLKEIQDAILIEKE  | 882 |
| CotAD_74481 | IEEGDIRKIIDPRLGSGFDVNAAWKAVEIAMWCAQRRTSKQRPDISQVIAELKECIGRNDQ | 714 |
| CotAD_21855 | IEEGDIRKIIDPRLGNDFVNAAWKAVEIAMWCAQRRTSKQRPDISQVIAELKGCIGRNDE  | 508 |
| CotAD_74959 | -----                                                         | 268 |
| AtSIF3      | LTKGDIISIMDPSLNGDYDSGSVWKAVELAMSCLNPSSTRRPTMSQVLIALNECLVSENS  | 855 |
| AtSIF1      | LTKGDIKNIMDPSLNGDYDSTSVWKAVELAMCCLNPSARRPNMSQVIELNECLTSENS    | 860 |
| AtSIF2      | LTKGDIINSIMDPNLNEDYDSGSVWKAVELAMSCLNPSARRPTMSQVIELNECIASSENS  | 856 |
| AtSIF4      | LTKGDIQSIMDPSLNEDYDSGSVWKAVELAMSCLNHSSARRPTMSQVIELNECLASENA   | 856 |
| CotAD_41732 | LSNGDIENIVDSRLKGFDEINSVWRAIEVAMACLSASTKRPTMNHVVELSECLVAEIN    | 844 |
| CotAD_31444 | IEREDIGSIVDQRLHGEFDVSSAWKALEVAMACTRPKSLHRATMSTVLTELNQCLAMELS  | 844 |
| CotAD_06671 | IEREDIGSIVDQRLHGEFDVSSAWKALQVAMACTRPKSLHRATMSTVLTELNQCLAMELS  | 766 |

|             |                                                       |     |
|-------------|-------------------------------------------------------|-----|
| CotAD_57195 | DEG----NAKLACGS-SRGQSSRKT---L--LASFLEIESPDLSNGSLVPSAR | 932 |
| CotAD_44233 | GMMVREGNSDEMSRN-SANSSYNPGSLDMIGTDNYLSL-----DESIARPVAR | 931 |
| CotAD_52119 | SMMVREGNSDEMSRN-SANSSYNPGSLDMIGTDNYLSL-----DESIARPVAR | 929 |
| CotAD_74481 | NVQ-----IEMT-----SLEMASYSYTLPRAR                      | 736 |
| CotAD_21855 | NVQ-----SEMT-----SLEMASYSYTFPEAR                      | 530 |
| CotAD_74959 | -----                                                 | 268 |
| AtSIF3      | RGG----ASRDMSKSSLE-----VSLTFDTEV-----SPMAR            | 884 |
| AtSIF1      | RGG----AIRDMSEGSIE-----VSLTFGTEV-----TPLAR            | 889 |
| AtSIF2      | RGG----ASRDMSKSSIE-----VSLTFDEL-----SPTAR             | 885 |
| AtSIF4      | RGG----ASRDMEKSSIE-----VSLTFGTEV-----SPNAR            | 885 |
| CotAD_41732 | RTR----GVDEDES RDMM SMA-----SLNCSDI-----IPLSR         | 874 |
| CotAD_31444 | HNR----ETKERFSEEIYIGPYN-----SSEVCSTSTTSYSITRPFAR      | 883 |
| CotAD_06671 | HNR----ETKERFSEEIYSGSYH-----SSEVCSTSTASYSITSLFAR      | 805 |
