# Supplementary material for: Genome-wide identification and characterization of LRR-RLKs reveal functional conservation of the SIF subfamily in cotton (Gossypium hirsutum)
Source: BMC Plant Biol. 2018 Sep 6;18:185. doi: 10.1186/s12870-018-1395-1 (PMC6128003; doi:10.1186/s12870-018-1395-1)
Supplement: Supplementary file 1 — Table S1. GhLRR-RLKs gene list. Table S2. Gene Localization and duplication Data. Table S3. InterProScan analysis. Table S4. Motif composition for each subclade. Table S5. List of SRA datasets downloaded for expression analysis. Table S6. Expression analysis. (XLSX 857 kb) [file 12870_2018_1395_MOESM1_ESM.xlsx]

## Sheet: Table S1
Table S1 GhLRR-RLKs gene list
subclade	Gene Ids	Chromosomal Location	Strand	Gene (bases)	Protein (aa)	pI	Molecular Wt (Kda)	No of LRRs
I	CotAD_06671	Dt_chr10:18890262-18899248	+ve	8986	805	5.2	89.1239	1
	CotAD_21855	Dt_chr11:59379654-59382865	-ve	3211	530	5.9	58.6928	1
	CotAD_31444	At_chr10:74235165-74239381	+ve	4216	883	5.5	97.9331	1
	CotAD_41732	scaffold1841.1:295565-299257	+ve	3692	874	5.07	98.1561	1
	CotAD_44233	Dt_chr6:8723081-8729837	+ve	6756	931	5.61	103.42	1
	CotAD_44784	Dt_chr1:78948595-78953095	-ve	4500	905	5.91	100.134	1
	CotAD_51795	scaffold2321.1:132728-137234	+ve	4506	903	5.8	99.8534	1
	CotAD_51911	At_chr7:17016668-17021160	+ve	4492	905	6.02	100.249	1
	CotAD_52119	At_chr6:54418232-54425784	-ve	7552	929	5.65	103.247	1
	CotAD_57195	Dt_chr5:24518889-24524481	-ve	5592	932	6.08	104.333	1
	CotAD_70912	At_chr8:23387952-23392064	-ve	4112	899	5.12	99.7816	1
	CotAD_74481	Dt_chr4:26307264-26312776	-ve	5512	736	6.64	82.0942	1
	CotAD_74959	scaffold5512.1:19230-20904	+ve	1674	268	7.01	29.1313	1
II	CotAD_00571	scaffold26.1:157281-160477	+ve	3196	618	6.09	68.5754	1
	CotAD_05290	Dt_chr7:16574434-16577563	-ve	3129	618	6.66	68.3144	1
	CotAD_09333	Dt_chr7:19257697-19260835	+ve	3138	618	6.66	68.3154	1
	CotAD_12135	Dt_chr13:50439940-50445040	-ve	5100	610	5.24	67.6103	1
	CotAD_12136	Dt_chr13:50411454-50419039	-ve	7585	607	6.17	67.2993	1
	CotAD_16150	Dt_chr13:41416492-41419477	-ve	2985	624	6.55	68.9371	1
	CotAD_19668	At_chr1:85420923-85424605	-ve	3682	606	5.79	67.6436	1
	CotAD_22753	Dt_chr7:24753674-24758706	+ve	5032	650	6.52	71.7112	1
	CotAD_23438	Dt_chr9:70045173-70048084	+ve	2911	643	6.77	70.5378	1
	CotAD_24945	At_chr7:31703898-31707939	+ve	4041	491	5.66	54.6685	1
	CotAD_28410	Dt_chr12:6406295-6411013	+ve	4718	545	5.68	60.2772	1
	CotAD_33376	At_chr13:76769709-76775717	-ve	6008	612	7.26	67.7912	1
	CotAD_33377	At_chr13:76797983-76804161	-ve	6178	513	8.41	56.5721	2
	CotAD_34384	Dt_chr7:35225282-35231291	-ve	6009	605	6.19	67.5435	1
	CotAD_34684	At_chr12:53187378-53192764	+ve	5386	597	5.31	66.1879	2
	CotAD_34685	At_chr12:53202445-53207183	+ve	4738	538	5.6	59.9346	1
	CotAD_39917	At_chr1:14559543-14565499	-ve	5956	627	5.55	69.0692	1
	CotAD_50934	Dt_chr12:29491615-29498179	-ve	6564	620	5.43	68.5743	1
	CotAD_57458	scaffold1837.1:26289-32388	+ve	6099	606	5.34	67.2308	1
	CotAD_62468	At_chr1:60793916-60799931	+ve	6015	605	5.93	67.7236	1
	CotAD_63155	At_chr9:15132000-15135156	-ve	3156	624	8.51	68.6196	1
	CotAD_64544	Dt_chr12:18512319-18515829	-ve	3510	638	6.24	70.0665	1
	CotAD_68316	At_chr12:7951486-7955008	+ve	3522	636	6.14	69.8383	1
	CotAD_69592	At_chr12:31002544-31008509	-ve	5965	647	5.53	71.1656	1
	CotAD_70108	At_chr13:57974370-57977360	+ve	2990	624	6.3	68.925	1
	CotAD_72225	scaffold3130.1:89283-95901	+ve	6618	620	5.43	68.6425	1
	CotAD_75033	Dt_chr9:10294687-10299259	+ve	4572	634	6.92	69.767	1
	CotAD_75189	scaffold3928.1:20202-24099	+ve	3897	524	8.48	58.341	1
III	CotAD_00353	Dt_chr9:66460198-66462087	+ve	1889	629	9.02	69.8284	2
	CotAD_00934	scaffold26.1:2995848-2999530	+ve	3682	1067	6.19	115.544	6
	CotAD_00967	scaffold26.1:3221541-3223956	+ve	2415	613	6.53	68.6132	1
	CotAD_01535	Dt_chr9:60456916-60459127	-ve	2211	666	6.29	73.7117	1
	CotAD_01701	Dt_chr9:59084017-59088294	+ve	4277	1028	6.88	112.13	1
	CotAD_02161	Dt_chr5:18645227-18647879	-ve	2652	644	9.04	70.1383	1
	CotAD_03206	Dt_chr6:6753706-6755656	+ve	1950	621	8.51	69.0351	1
	CotAD_03665	At_chr9:42942108-42944726	-ve	2618	654	6.51	72.1408	1
	CotAD_04243	Dt_chr5:14061766-14065337	-ve	3571	637	6.07	69.7927	1
	CotAD_04319	At_chr8:78269416-78271209	-ve	1793	597	8.17	64.3269	2
	CotAD_04320	At_chr8:78263905-78267102	-ve	3197	786	7.56	84.8892	1
	CotAD_05278	Dt_chr7:16428289-16430448	+ve	2159	691	8.1	76.2044	3
	CotAD_05288	Dt_chr7:16524776-16527067	+ve	2291	611	8.54	66.282	1
	CotAD_06952	At_chr2:12855052-12856882	-ve	1830	583	8.86	65.858	1
	CotAD_07215	scaffold72.1:434240-436763	+ve	2523	343	9.27	37.3729	1
	CotAD_08621	Dt_chr3:23109371-23114958	-ve	5587	1060	6.36	115.604	5
	CotAD_09217	Dt_chr1:37701139-37704851	+ve	3712	782	8.25	84.3617	1
	CotAD_09352	Dt_chr7:19422107-19424266	-ve	2159	691	8.08	76.2666	2
	CotAD_09577	At_chr9:52812011-52816813	-ve	4802	1054	7.32	114.896	2
	CotAD_09713	Dt_chr9:57651858-57653851	-ve	1993	624	5.7	68.0798	1
	CotAD_12535	At_chr7:1995535-1997723	+ve	2188	671	6.14	72.8548	1
	CotAD_13103	Dt_chr8:43565120-43568762	-ve	3642	706	6.62	77.3549	1
	CotAD_14467	At_chr7:2961715-2963900	-ve	2185	670	6.08	72.8297	1
	CotAD_15200	scaffold413.1:744435-747887	+ve	3452	1029	5.56	111.378	6
	CotAD_15231	scaffold413.1:977039-979445	+ve	2406	614	6.53	68.5822	1
	CotAD_17672	At_chr10:71100922-71103502	-ve	2580	575	7.14	63.2274	1
	CotAD_17827	scaffold120.1:671650-674524	+ve	2874	621	6.95	68.6802	1
	CotAD_18413	Dt_chr9:51288977-51291087	-ve	2110	674	7.13	74.2477	2
	CotAD_18790	scaffold336.1:1020854-1028242	+ve	7388	878	8.5	97.0006	2
	CotAD_20150	Dt_chr11:57262343-57264891	+ve	2548	639	8.7	72.0516	1
	CotAD_21656	Dt_chr5:25888139-25891959	+ve	3820	716	8.23	77.8987	1
	CotAD_21953	Dt_chr11:60581743-60583758	+ve	2015	640	8.64	70.085	2
	CotAD_22332	scaffold613.1:355359-357717	+ve	2358	715	9.06	77.7467	1
	CotAD_22998	scaffold755.1:489256-493215	-ve	3959	535	6.01	58.9695	1
	CotAD_23361	Dt_chr9:70646301-70648526	-ve	2225	581	8.64	62.8119	2
	CotAD_23850	Dt_chr10:20157665-20160225	-ve	2560	585	7.14	64.5478	1
	CotAD_24428	At_chr10:63639290-63641214	-ve	1924	609	8.88	67.1091	2
	CotAD_26081	scaffold477.1:620795-628357	+ve	7562	589	7.09	64.5298	1
	CotAD_26963	At_chr9:45035171-45037153	-ve	1982	620	6.09	67.8096	1
	CotAD_27412	Dt_chr3:39565639-39567735	+ve	2096	630	8.21	69.8381	3
	CotAD_27957	Dt_chr11:17126462-17128437	-ve	1975	628	7.3	69.014	2
	CotAD_28297	Dt_chr2:49759130-49762277	-ve	3147	641	8.65	70.1925	1
	CotAD_29297	scaffold769.1:482895-485636	+ve	2741	589	6.74	64.2814	1
	CotAD_29800	Dt_chr2:45006372-45008202	+ve	1830	583	8.79	65.7909	1
	CotAD_30981	Dt_chr1:36887692-36891377	+ve	3685	732	8.38	81.5028	1
	CotAD_31330	Dt_chr9:53518593-53521226	-ve	2633	654	6.66	72.1641	1
	CotAD_32107	scaffold587.1:143258-146179	+ve	2921	765	6.7	83.3464	1
	CotAD_32119	scaffold587.1:230544-233446	+ve	2902	659	9.28	72.4455	1
	CotAD_33020	At_chr13:91210990-91214061	-ve	3071	723	6.31	77.9964	1
	CotAD_33544	scaffold712.1:61515-64459	-ve	2944	658	9.45	72.2203	1
	CotAD_33555	scaffold712.1:158811-161726	-ve	2915	765	6.4	83.2242	1
	CotAD_35034	Dt_chr7:26167668-26169997	+ve	2329	553	9.46	60.7251	1
	CotAD_35956	Dt_chr1:44988676-44990979	-ve	2303	636	8.59	68.8341	1
	CotAD_37063	At_chr3:43134891-43140590	-ve	5699	1060	6.4	115.711	4
	CotAD_37346	Dt_chr2:37685579-37687690	-ve	2111	649	6.27	71.7874	1
	CotAD_41057	Dt_chr1:74814976-74817672	-ve	2696	606	8.69	65.0466	2
	CotAD_43408	Dt_chr9:69115460-69117972	-ve	2512	674	8.65	72.5579	2
	CotAD_44246	Dt_chr5:58565446-58567574	+ve	2128	615	8.6	67.2065	2
	CotAD_45027	Dt_chr9:69731409-69734050	+ve	2641	606	6.7	65.5394	2
	CotAD_47120	Dt_chr13:17858868-17860781	-ve	1913	597	7.87	67.2482	1
	CotAD_50484	At_chr9:46218972-46221182	+ve	2210	666	6.13	73.5386	1
	CotAD_51936	Dt_chr10:1728671-1731316	+ve	2645	778	7.56	83.5907	2
	CotAD_52468	scaffold2285.1:228614-230690	-ve	2076	608	8.54	66.6919	1
	CotAD_53451	Dt_chr10:34822727-34824959	+ve	2232	661	7.56	73.5179	1
	CotAD_53742	Dt_chr8:8940347-8942809	+ve	2462	744	6.27	80.8339	2
	CotAD_55051	scaffold1931.1:9553-11478	+ve	1925	609	8.66	66.964	2
	CotAD_55539	At_chr10:34862013-34864658	-ve	2645	795	6.97	85.3195	2
	CotAD_57023	At_chr13:15833093-15835011	-ve	1918	597	8.11	67.2703	1
	CotAD_57276	At_chr3:15082183-15084131	-ve	1948	584	7.68	65.1372	2
	CotAD_57664	At_chr11:24882860-24884835	+ve	1975	628	7.63	69.0151	2
	CotAD_58704	At_chr1:95133175-95135629	-ve	2454	655	9.22	72.1413	1
	CotAD_59521	At_chr10:49884245-49886349	+ve	2104	606	8.58	65.1576	2
	CotAD_60026	scaffold2235.1:153553-156995	+ve	3442	673	7.93	73.4617	1
	CotAD_60417	At_chr5:2349319-2353672	+ve	4353	659	8.54	72.4782	2
	CotAD_60775	At_chr10:79832521-79835391	+ve	2870	634	9.07	71.0073	1
	CotAD_61551	scaffold957.1:594880-596877	+ve	1997	636	6.87	68.992	1
	CotAD_62511	At_chr12:7131822-7134110	-ve	2288	705	5.89	77.4353	1
	CotAD_62520	At_chr12:7271661-7274326	-ve	2665	644	8.96	70.4437	1
	CotAD_63572	At_chr9:50917350-50919239	-ve	1889	629	9.02	69.9536	2
	CotAD_65914	At_chr12:91634918-91638371	-ve	3453	661	8.53	72.358	2
	CotAD_68390	At_chr1:65448671-65454859	-ve	6188	1060	5.96	115.516	5
	CotAD_68984	scaffold4246.1:66409-68519	-ve	2110	674	7.93	74.2508	2
	CotAD_69284	At_chr5:34309816-34313634	-ve	3818	716	7.82	77.8435	1
	CotAD_69922	Dt_chr7:807114-813388	-ve	6274	1060	6.01	115.251	4
	CotAD_70286	At_chr12:76811218-76814463	+ve	3245	655	8.89	70.5697	1
	CotAD_70672	Dt_chr1:18830440-18832989	-ve	2549	631	9.15	68.9023	2
	CotAD_72615	At_chr8:32905311-32907767	+ve	2456	742	6.31	80.7959	2
	CotAD_74021	At_chr10:89440550-89442782	-ve	2232	661	7.93	73.5129	1
	CotAD_74134	Dt_chr5:37753229-37755771	-ve	2542	655	8.71	70.5988	1
IV-1	CotAD_00229	Dt_chr9:65547044-65550398	-ve	3354	972	5.5	106.736	7
	CotAD_17222	At_chr6:53026281-53029040	-ve	2759	886	6.13	96.7692	3
	CotAD_20525	Dt_chr6:11171595-11174291	-ve	2696	865	6.21	94.6018	3
	CotAD_22931	Dt_chr10:1318455-1321464	-ve	3009	974	7.02	107.519	8
	CotAD_74113	scaffold4755.1:19220-22575	-ve	3355	972	5.6	106.837	7
IV-2	CotAD_01210	Dt_chr10:10349898-10352274	+ve	2376	641	8.61	69.9433	1
	CotAD_21762	scaffold506.1:132521-134699	-ve	2178	640	7.07	70.1621	1
	CotAD_28062	Dt_chr8:51999110-52001690	+ve	2580	684	6.92	75.5734	1
	CotAD_42787	At_chr13:11918387-11920544	+ve	2157	651	6.54	71.861	1
	CotAD_45995	scaffold544.1:821739-823895	+ve	2156	661	6.66	72.9185	1
	CotAD_63133	Dt_chr6:27478986-27481277	+ve	2291	669	7.45	73.0638	1
	CotAD_71255	At_chr6:20675180-20677468	+ve	2288	669	6.44	73.0627	1
V	CotAD_00712	scaffold26.1:1299390-1304149	+ve	4759	756	6.3	82.4824	1
	CotAD_00860	scaffold26.1:2519439-2523169	+ve	3730	726	5.95	78.6224	1
	CotAD_01529	Dt_chr9:60515421-60519646	-ve	4225	709	8.71	77.8871	1
	CotAD_04269	Dt_chr5:14289613-14296292	-ve	6679	835	5.56	91.07	1
	CotAD_09747	Dt_chr9:57393001-57397852	+ve	4851	728	6.1	79.5627	3
	CotAD_17196	At_chr6:52684022-52689380	+ve	5358	734	5.97	81.2584	1
	CotAD_20501	Dt_chr6:10868256-10873481	+ve	5225	740	6.25	81.6629	3
	CotAD_26995	At_chr9:44777486-44782419	+ve	4933	728	6.1	79.5037	3
	CotAD_28859	At_chr5:47948018-47955228	-ve	7210	795	5.72	86.1651	1
	CotAD_33194	scaffold1231.1:471791-475526	+ve	3735	726	5.87	78.4423	2
	CotAD_45404	At_chr11:71632880-71638983	+ve	6103	724	5.59	78.7168	2
	CotAD_46319	scaffold1957.1:111873-116793	-ve	4920	812	6.27	89.0179	1
	CotAD_50478	At_chr9:46138755-46142571	+ve	3816	704	8.79	76.818	1
	CotAD_52484	Dt_chr11:1047535-1053030	+ve	5495	721	6.36	78.2195	3
	CotAD_53454	Dt_chr10:34553337-34559157	+ve	5820	706	8.66	78.2389	1
	CotAD_62836	At_chr10:60505477-60510765	-ve	5288	690	8.36	76.0926	1
	CotAD_65393	At_chr10:24353932-24360051	-ve	6119	724	5.76	78.7619	2
	CotAD_68332	At_chr11:63677177-63682763	-ve	5586	721	6.26	78.1945	3
VI-1	CotAD_00160	Dt_chr9:64979940-64982498	-ve	2558	852	6.33	93.7493	4
	CotAD_45281	At_chr9:52033087-52035645	+ve	2558	852	6.33	93.8463	6
	CotAD_74115	At_chr10:82772488-82774938	-ve	2450	816	6.3	89.4202	4
	CotAD_06868	At_chr13:25417871-25420075	+ve	2204	734	6.82	81.107	1
	CotAD_10941	At_chr6:3539725-3541932	-ve	2207	735	6.66	81.2822	3
	CotAD_47770	Dt_chr10:35901258-35903565	+ve	2307	680	9.4	75.5746	3
	CotAD_76570	At_chr10:51480457-51482765	+ve	2308	680	9.47	75.859	2
VI-2	CotAD_01620	Dt_chr9:59728472-59732224	-ve	3752	663	5.62	72.7893	1
	CotAD_05661	At_chr9:84499280-84505673	+ve	6393	724	5.28	80.9186	1
	CotAD_08656	At_chr1:51516239-51519916	-ve	3677	688	4.88	75.6721	1
	CotAD_11338	Dt_chr6:4619848-4624676	+ve	4828	658	7	73.2894	2
	CotAD_17389	At_chr7:13758594-13762324	-ve	3730	609	5.12	67.1866	1
	CotAD_19795	At_chr11:7384482-7388217	-ve	3735	629	6.94	70.3928	1
	CotAD_20247	Dt_chr6:18102265-18106320	-ve	4055	713	5.22	78.7031	1
	CotAD_20384	scaffold290.1:575893-579040	-ve	3147	659	6.94	73.5878	1
	CotAD_25446	scaffold149.1:1629841-1633673	+ve	3832	659	6.28	73.5415	1
	CotAD_31999	At_chr6:42455965-42460097	+ve	4132	726	5.48	80.1861	1
	CotAD_51873	scaffold1637.1:54439-58117	+ve	3678	573	5.96	63.6261	1
	CotAD_53665	At_chr5:1723282-1726692	+ve	3410	659	6.35	73.5396	1
	CotAD_07850	scaffold104.1:472278-475759	+ve	3481	772	8.43	85.832	1
	CotAD_07880	scaffold104.1:816267-819748	-ve	3481	768	7.82	85.1159	1
	CotAD_36271	Dt_chr12:34252061-34255144	+ve	3083	765	7.84	84.8527	2
	CotAD_47174	Dt_chr9:905164-911624	+ve	6460	788	6.43	87.3885	1
	CotAD_47824	At_chr9:1447998-1451087	-ve	3089	765	7.55	84.8587	2
	CotAD_63477	scaffold3306.1:107738-112932	-ve	5194	741	7.33	83.3278	2
	CotAD_64199	At_chr13:21090356-21094555	-ve	4199	782	7.58	86.5076	1
	CotAD_67756	Dt_chr7:41659617-41663631	-ve	4014	782	8.6	86.9873	1
	CotAD_69140	At_chr12:46126518-46129160	+ve	2642	709	9.06	77.7825	2
	CotAD_74948	At_chr12:67182667-67185934	-ve	3267	726	9.11	79.7409	2
	CotAD_75884	At_chr1:39770830-39774877	+ve	4047	790	8.68	88.0238	3
VII	CotAD_19718	At_chr11:7985297-7988655	+ve	3358	975	5.77	104.981	2
	CotAD_20164	Dt_chr11:57574315-57577560	-ve	3245	966	5.77	104.042	2
	CotAD_24413	At_chr10:63510594-63513843	+ve	3249	955	5.53	103.453	1
	CotAD_25377	scaffold149.1:307558-310303	+ve	2745	885	6.27	96.5264	1
	CotAD_26531	Dt_chr6:3270191-3273240	+ve	3049	985	5.94	108.272	4
	CotAD_27936	Dt_chr11:17603329-17606672	+ve	3343	954	5.63	103.597	3
	CotAD_28043	Dt_chr8:52150384-52153132	+ve	2748	886	5.68	96.0426	1
	CotAD_37427	scaffold1554.1:325724-328472	-ve	2748	886	5.64	96.1898	2
	CotAD_55064	scaffold1931.1:145694-148956	-ve	3262	987	5.63	107.362	2
	CotAD_74473	scaffold5824.1:13612-16357	-ve	2745	885	6.94	96.2282	1
	CotAD_02312	Dt_chr5:17048993-17051992	+ve	2999	999	6.16	108.09	5
	CotAD_25309	Dt_chr7:21828064-21831450	-ve	3386	1128	5.44	121.951	4
	CotAD_33907	scaffold1588.1:199781-203068	-ve	3287	1095	5.48	118.741	4
	CotAD_38523	Dt_chr9:46627865-46631029	+ve	3164	1054	6.17	115.408	8
	CotAD_59559	At_chr9:35583473-35586898	-ve	3425	1141	6.11	124.83	6
	CotAD_66533	At_chr1:56450809-56454195	+ve	3386	1128	5.49	121.991	3
	CotAD_67251	scaffold3917.1:64187-67543	+ve	3356	1118	6.02	122.294	5
VIII-1	CotAD_18948	At_chr6:56255393-56260086	-ve	4693	977	6.11	107.881	2
	CotAD_22235	Dt_chr11:3335523-3342682	+ve	7159	959	5.65	105.726	4
	CotAD_24456	At_chr10:64140851-64145198	+ve	4347	938	6.06	103.224	1
	CotAD_59281	Dt_chr10:43191117-43194682	-ve	3565	838	6.46	93.3509	2
	CotAD_73761	scaffold4784.1:30313-37939	-ve	7626	1045	5.65	115.249	1
	CotAD_72038	Dt_chr11:917796-925409	-ve	7613	1045	5.63	115.193	1
	CotAD_67284	scaffold3032.1:129572-143377	-ve	13805	1069	6.71	119.177	1
	CotAD_72041	Dt_chr11:935789-942113	-ve	6324	1004	6.1	110.524	1
	CotAD_20224	Dt_chr6:17753395-17759656	-ve	6261	936	5.57	103.11	1
	CotAD_40381	Dt_chr11:60766382-60776587	+ve	10205	1097	6.37	121.115	1
	CotAD_52196	Dt_chr2:45912137-45925734	-ve	13597	992	5.04	108.917	1
	CotAD_75181	At_chr2:14680351-14693340	+ve	12989	1013	5.12	111.724	1
	CotAD_67647	scaffold1962.1:99201-104589	+ve	5388	915	5.93	101.793	1
	CotAD_47804	Dt_chr10:37511808-37521478	-ve	9670	1034	6.18	115.209	2
	CotAD_52283	At_chr3:2482906-2490348	-ve	7442	967	7.19	108.378	1
	CotAD_25702	Dt_chr9:55575744-55583380	+ve	7636	852	6.01	95.3961	1
	CotAD_25705	Dt_chr9:55535316-55543341	+ve	8025	955	7.21	106.771	1
	CotAD_47801	Dt_chr10:37389560-37400961	+ve	11401	993	5.77	111.255	1
	CotAD_67655	scaffold1962.1:316835-324559	-ve	7724	839	5.79	93.6106	2
	CotAD_47800	Dt_chr10:37381787-37387091	+ve	5304	939	5.27	104.974	1
	CotAD_70461	scaffold4011.1:45228-58603	-ve	13375	963	8	106.542	1
	CotAD_66457	scaffold3068.1:12496-20114	-ve	7618	1015	5.51	111.563	1
	CotAD_66459	scaffold3068.1:43200-48939	+ve	5739	927	6.7	102.406	1
	CotAD_66464	scaffold3068.1:130905-135871	+ve	4966	661	6.74	72.9005	2
	CotAD_66465	scaffold3068.1:152814-159811	+ve	6997	979	6.13	107.971	1
	CotAD_21607	Dt_chr9:29488246-29494474	+ve	6228	951	5.28	104.031	1
	CotAD_24716	scaffold235.1:733695-741246	-ve	7551	995	5.67	109.268	1
	CotAD_24717	scaffold235.1:763906-773464	+ve	9558	1014	6.14	111.785	1
	CotAD_24718	scaffold235.1:780398-792961	+ve	12563	923	5.75	101.061	2
	CotAD_24719	scaffold235.1:800144-812824	+ve	12680	985	6.53	107.965	1
	CotAD_24721	scaffold235.1:829045-836750	+ve	7705	1015	6.63	111.193	2
VIII-2	CotAD_25154	At_chr9:36673629-36682365	-ve	8736	959	5.92	105.287	3
	CotAD_27954	Dt_chr11:17190346-17195038	+ve	4692	977	6.11	107.895	2
	CotAD_33692	scaffold1428.1:100705-107870	-ve	7165	940	6.12	104.307	3
	CotAD_35146	scaffold1451.1:365138-377198	-ve	12060	1343	6.22	147.221	3
	CotAD_37459	Dt_chr5:56817056-56821634	+ve	4578	875	6.06	95.1432	1
	CotAD_46053	Dt_chr9:55105495-55112641	-ve	7146	972	5.49	106.689	3
	CotAD_61336	At_chr3:9987412-9991875	+ve	4463	819	6.18	88.3954	1
	CotAD_62571	At_chr3:6668779-6676680	+ve	7901	977	8.28	108.018	1
	CotAD_69673	At_chr6:31673373-31681131	+ve	7758	954	8.68	105.766	3
IX	CotAD_09317	Dt_chr7:18999510-19002588	+ve	3078	951	5.88	103.616	1
	CotAD_11871	scaffold42.1:599040-602133	+ve	3093	953	5.6	103.461	1
	CotAD_13091	Dt_chr8:43342948-43345788	-ve	2840	893	6.03	98.1005	1
	CotAD_17108	At_chr6:51464481-51467655	-ve	3174	906	6.34	98.8053	1
	CotAD_24219	Dt_chr7:36867305-36870211	-ve	2906	940	5.81	101.818	1
	CotAD_24493	scaffold238.1:305934-309007	+ve	3073	946	5.38	103.011	3
	CotAD_26554	Dt_chr6:3085061-3088193	-ve	3132	938	8.83	101.832	1
	CotAD_27211	scaffold178.1:24207-27412	-ve	3205	920	5.46	99.2779	2
	CotAD_30717	Dt_chr13:54345022-54347924	+ve	2902	939	5.91	101.646	1
	CotAD_31541	Dt_chr6:9816348-9819522	-ve	3174	953	6.18	104.049	1
	CotAD_33520	scaffold1051.1:417878-421119	-ve	3241	922	5.64	99.7419	1
	CotAD_36211	Dt_chr11:24516246-24519433	-ve	3187	920	5.43	99.4533	2
	CotAD_36318	At_chr6:46335851-46338991	-ve	3140	909	5.56	99.5931	1
	CotAD_46866	Dt_chr1:47792265-47795902	+ve	3637	979	5.71	106.984	1
	CotAD_51412	At_chr1:53564833-53567917	+ve	3084	953	5.91	103.709	1
	CotAD_52669	At_chr2:36776979-36779822	+ve	2843	895	6.09	98.1684	1
	CotAD_53070	scaffold2388.1:183469-186722	-ve	3253	922	5.6	99.3121	1
	CotAD_60611	Dt_chr1:32147183-32151028	+ve	3845	979	5.6	106.953	2
X-I	CotAD_25896	At_chr3:19999657-20003242	-ve	3585	1088	5.46	120.252	3
	CotAD_76749	scaffold10917.1:20-3143	-ve	3123	958	7.02	105.88	5
	CotAD_03886	Dt_chr7:7299164-7302688	-ve	3524	1099	6.72	120.953	3
X-II	CotAD_05471	Dt_chr7:4661391-4664813	+ve	3422	1140	6.62	124.522	5
	CotAD_10082	At_chr7:6944704-6947742	-ve	3038	1012	6.29	111.971	1
	CotAD_10180	At_chr7:7726812-7730671	+ve	3859	1140	6.77	124.653	4
	CotAD_13173	Dt_chr8:44300501-44303884	-ve	3383	1127	8.43	123.883	7
	CotAD_15772	Dt_chr13:38497224-38500370	-ve	3146	1048	8.27	115.223	6
	CotAD_25801	Dt_chr1:55050390-55053763	+ve	3373	1098	6.62	120.051	3
	CotAD_44726	scaffold1108.1:477729-481127	-ve	3398	1132	8.43	124.168	6
	CotAD_67300	Dt_chr1:27465240-27468600	+ve	3360	970	6.42	106.17	4
	CotAD_70298	scaffold3441.1:127130-129892	-ve	2762	920	6.03	100.52	1
X_III	CotAD_00975	scaffold26.1:3273445-3276702	-ve	3257	1085	5.76	119.757	3
	CotAD_05438	Dt_chr7:4261728-4263545	-ve	1817	605	6.48	67.139	1
	CotAD_10129	At_chr7:7257634-7259902	+ve	2268	605	6.83	67.1571	1
	CotAD_15239	scaffold413.1:1026238-1027815	-ve	1577	525	5.99	58.1003	1
	CotAD_16886	At_chr2:7856283-7859441	-ve	3158	1052	6.54	115.474	3
	CotAD_18195	scaffold377.1:301913-305755	+ve	3842	1280	5.71	139.86	3
	CotAD_20733	At_chr9:47958866-47960686	-ve	1820	606	7.85	67.2485	1
	CotAD_21149	Dt_chr9:5983202-5986357	+ve	3155	1051	6.31	115.869	5
	CotAD_24661	Dt_chr5:32869800-32872838	+ve	3038	1012	5.75	112.975	3
	CotAD_25005	At_chr7:2588458-2590428	-ve	1970	619	6.86	68.3846	1
	CotAD_28712	Dt_chr1:85445069-85446889	+ve	1820	606	7.15	67.2074	1
	CotAD_37176	At_chr12:60008461-60011616	+ve	3155	1051	5.85	115.813	3
	CotAD_39293	Dt_chr2:26451561-26455145	-ve	3584	1194	6.6	130.069	3
	CotAD_45775	scaffold516.1:69564-73199	+ve	3635	1211	6.54	131.575	6
	CotAD_47479	Dt_chr9:1261323-1264958	+ve	3635	1211	6.54	131.525	6
	CotAD_47651	At_chr9:64180895-64182679	+ve	1784	594	6.3	65.8827	1
	CotAD_52735	Dt_chr4:34184398-34188225	+ve	3827	1275	5.75	138.798	3
	CotAD_55480	At_chr5:43824002-43826582	+ve	2580	611	6.33	67.1481	2
	CotAD_57105	At_chr3:93164379-93166790	-ve	2411	803	6.97	88.2421	3
	CotAD_59591	Dt_chr2:3773766-3777173	-ve	3407	1135	6.04	124.572	5
	CotAD_66191	At_chr4:15466424-15470251	+ve	3827	1275	5.95	138.801	4
	CotAD_70056	At_chr5:54134078-54137684	+ve	3606	1012	5.7	112.907	2
	CotAD_71049	At_chr1:29244598-29248182	-ve	3584	1194	6.32	129.938	4
	CotAD_72117	scaffold1876.1:23498-26908	+ve	3410	1136	5.97	124.799	5
X-IV	CotAD_13565	Dt_chr6:12415738-12418677	+ve	2939	944	8.32	102.777	4
	CotAD_20003	At_chr6:49844392-49847331	-ve	2939	944	8.91	102.807	4
	CotAD_20545	Dt_chr6:11438370-11441115	-ve	2745	885	5.88	97.7434	3
	CotAD_20548	Dt_chr6:11449820-11452565	-ve	2745	885	5.94	97.6112	3
	CotAD_43293	At_chr6:50713157-50715903	-ve	2746	885	5.78	97.5251	2
	CotAD_44030	Dt_chr8:9920705-9923471	-ve	2766	888	5.71	97.343	2
	CotAD_73608	scaffold908.1:178181-181040	-ve	2859	919	5.88	101.047	2
XI_1	CotAD_00237	Dt_chr9:65627127-65630254	+ve	3127	1012	5.76	112.61	2
	CotAD_00444	Dt_chr9:67099213-67102320	-ve	3107	1005	7.75	111.108	1
	CotAD_00656	scaffold26.1:824010-827092	-ve	3082	1000	5.94	110.19	1
	CotAD_00894	scaffold26.1:2746669-2750575	+ve	3906	1117	5.31	123.568	2
	CotAD_03099	Dt_chr5:6661722-6665700	+ve	3978	992	7.53	108.849	1
	CotAD_03134	Dt_chr5:6482646-6486324	-ve	3678	995	8.01	109.746	4
	CotAD_04883	scaffold56.1:752926-756103	+ve	3177	1028	5.9	111.316	4
	CotAD_05855	Dt_chr5:49964028-49967492	-ve	3464	1078	5.65	117.694	3
	CotAD_06290	Dt_chr11:4455295-4458294	-ve	2999	957	6.58	105.59	2
	CotAD_07539	At_chr9:39945070-39948123	+ve	3053	983	6.15	108.549	1
	CotAD_08450	Dt_chr3:25994360-25996993	+ve	2633	877	6.22	97.5975	3
	CotAD_08452	Dt_chr3:25964757-25968146	+ve	3389	1026	5.95	111.889	3
	CotAD_08453	Dt_chr3:25950148-25953424	+ve	3276	987	6.38	107.801	3
	CotAD_10397	Dt_chr1:43483360-43486329	+ve	2969	812	5.2	90.0949	2
	CotAD_11446	Dt_chr6:3826619-3830176	-ve	3557	1104	6.45	122.298	3
	CotAD_11545	scaffold189.1:580894-584222	-ve	3328	1080	5.57	119.339	1
	CotAD_13406	Dt_chr9:52914735-52921968	-ve	7233	1544	8.85	171.069	3
	CotAD_14259	Dt_chr8:3309048-3312214	-ve	3166	983	8.09	108.58	2
	CotAD_14939	Dt_chr12:11546347-11549752	+ve	3405	1105	6.45	121.82	2
	CotAD_14975	scaffold39.1:540220-543318	+ve	3098	1006	6.82	110.261	1
	CotAD_15034	scaffold39.1:1729330-1731780	-ve	2450	816	6.23	89.6856	1
	CotAD_15160	scaffold413.1:486343-490178	+ve	3835	1118	5.37	123.345	2
	CotAD_15853	Dt_chr12:1154667-1157579	-ve	2912	944	6.31	103.93	1
	CotAD_16694	Dt_chr9:45978556-45981757	-ve	3201	1027	7.24	111.643	5
	CotAD_16707	Dt_chr9:45734909-45737961	-ve	3052	977	5.35	107.533	4
	CotAD_17481	At_chr7:11408250-11412498	+ve	4248	1033	7.72	113.415	2
	CotAD_18696	scaffold336.1:61534-64671	+ve	3137	1015	5.16	112.798	2
	CotAD_20689	At_chr10:27736844-27739252	-ve	2408	774	6.52	84.5916	1
	CotAD_22778	Dt_chr7:24990825-24994688	-ve	3863	1039	6.04	113.85	3
	CotAD_23502	At_chr8:39788164-39791331	+ve	3167	983	8.43	108.342	2
	CotAD_25642	scaffold445.1:995549-998582	-ve	3033	985	7.9	109.736	1
	CotAD_28916	At_chr5:49163419-49166692	+ve	3273	996	ND	ND	1
	CotAD_31161	At_chr9:57728095-57731094	-ve	2999	957	6.72	105.674	3
	CotAD_31836	scaffold821.1:345688-349924	+ve	4236	1000	8.1	109.677	2
	CotAD_32393	Dt_chr5:46586630-46589095	-ve	2465	797	6.76	88.8723	1
	CotAD_32395	Dt_chr5:46526386-46529337	-ve	2951	956	8.15	106.55	1
	CotAD_34286	At_chr11:46273997-46277099	-ve	3102	997	6.25	111.066	1
	CotAD_34813	At_chr9:33664763-33667813	-ve	3050	977	5.69	107.582	4
	CotAD_34828	At_chr9:34041435-34044695	-ve	3260	1019	6.64	111.161	4
	CotAD_36059	Dt_chr9:49269447-49271537	-ve	2090	662	6.88	72.7956	1
	CotAD_37125	Dt_chr8:7232757-7236071	+ve	3314	1012	6.17	110.601	1
	CotAD_39199	scaffold269.1:1004908-1008067	+ve	3159	1021	6.32	112.056	5
	CotAD_40450	scaffold2142.1:61614-65292	-ve	3678	996	8.56	109.856	4
	CotAD_42374	Dt_chr5:61616012-61619043	+ve	3031	980	6.14	108.095	2
	CotAD_44505	At_chr9:43558917-43568758	+ve	9841	1878	7.83	207.608	2
	CotAD_44808	Dt_chr1:79524698-79528325	+ve	3627	1145	5.37	124.245	2
	CotAD_46914	Dt_chr2:43718782-43722184	-ve	3402	1100	5.66	119.541	1
	CotAD_47446	Dt_chr9:1575227-1578139	-ve	2912	911	5.77	99.2449	1
	CotAD_47865	scaffold1213.1:340036-343184	-ve	3148	988	5.86	109.513	3
	CotAD_47867	scaffold1213.1:373778-377168	-ve	3390	1026	6.06	111.877	3
	CotAD_47868	scaffold1213.1:399588-403035	-ve	3447	1047	6.05	114.123	3
	CotAD_48311	Dt_chr1:3819838-3823017	-ve	3179	1004	6.23	109.118	2
	CotAD_49044	Dt_chr2:8281995-8285099	-ve	3104	1008	6.7	110.543	1
	CotAD_49280	At_chr8:68185098-68187996	-ve	2898	907	5.58	99.695	1
	CotAD_50376	Dt_chr4:4563019-4566537	+ve	3518	1138	6.19	126.749	4
	CotAD_52756	At_chr9:49428516-49431623	+ve	3107	1005	8.31	111.506	2
	CotAD_53086	At_chr3:12292265-12295225	+ve	2960	959	8.44	107.044	1
	CotAD_53087	At_chr3:12210583-12213537	+ve	2954	962	6.03	107.504	1
	CotAD_54399	Dt_chr7:31069921-31073397	-ve	3476	1016	6.36	111.198	2
	CotAD_55701	Dt_chr9:49536088-49539441	+ve	3353	939	6.62	104.52	1
	CotAD_57775	At_chr3:39109426-39112890	-ve	3464	1078	5.77	117.817	3
	CotAD_57832	At_chr7:30311026-30314247	-ve	3221	1005	6.05	108.952	4
	CotAD_58185	At_chr3:33067019-33069281	-ve	2262	724	6.95	80.3669	1
	CotAD_59243	At_chr3:60553315-60556475	-ve	3160	1021	6.29	111.884	5
	CotAD_59386	At_chr3:29094330-29097361	+ve	3031	980	5.92	108.129	2
	CotAD_62456	At_chr11:28251085-28255074	+ve	3989	1124	5.91	121.705	3
	CotAD_64056	scaffold3586.1:25714-29072	+ve	3358	994	5.57	109.138	1
	CotAD_65075	scaffold3470.1:125547-127489	-ve	1942	621	8.27	68.4599	1
	CotAD_66780	Dt_chr11:42454409-42456879	+ve	2470	789	6.08	85.49	2
	CotAD_68241	At_chr1:80497278-80500757	+ve	3479	1017	6.38	111.477	2
	CotAD_68701	At_chr9:34666749-34670103	-ve	3354	939	7	104.404	1
	CotAD_68703	At_chr9:34677499-34679538	-ve	2039	408	9.13	45.5434	1
	CotAD_71264	At_chr1:43535236-43537644	+ve	2408	774	6.68	84.7077	1
	CotAD_71450	Dt_chr1:2157614-2161240	+ve	3626	1145	5.33	124.253	1
	CotAD_76248	At_chr11:36596247-36599756	+ve	3509	1136	5.4	123.088	1
	CotAD_76325	At_chr3:56733620-56736934	-ve	3314	1013	6.17	110.672	1
XI-2	CotAD_31665	Dt_chr8:47716179-47718110	+ve	1931	643	8.82	71.2551	2
	CotAD_01890	Dt_chr3:12437559-12439478	-ve	1919	639	9.04	71.124	2
	CotAD_70689	At_chr5:8155403-8157410	+ve	2007	639	9.08	71.2954	2
XI_3	CotAD_00188	Dt_chr9:65225179-65228097	-ve	2918	945	6.25	104.223	3
	CotAD_33226	Dt_chr10:29371555-29373894	+ve	2339	556	8.13	60.7591	1
	CotAD_46478	At_chr11:5397457-5400302	-ve	2845	725	6.89	79.789	1
	CotAD_52911	Dt_chr6:2437764-2440682	+ve	2918	945	5.89	104.153	4
XI-IV	CotAD_08372	scaffold190.1:1109897-1112951	+ve	3054	854	6.73	94.2979	2
	CotAD_09151	Dt_chr1:38517051-38521007	-ve	3956	914	8.3	99.8719	2
	CotAD_31758	Dt_chr5:9089478-9092527	-ve	3049	808	7.2	88.8686	2
	CotAD_38001	Dt_chr2:39422316-39426105	-ve	3789	902	7.58	99.587	4
	CotAD_47429	scaffold2312.1:143782-148175	-ve	4393	899	7.23	99.1135	3
	CotAD_56131	scaffold2838.1:37817-42216	+ve	4399	899	8.41	99.3328	3
	CotAD_60304	Dt_chr13:53596975-53601219	+ve	4244	906	7.58	99.5844	2
	CotAD_69381	At_chr2:18517317-18521106	-ve	3789	900	7.87	99.3668	4
	CotAD_69974	At_chr3:97633169-97637383	+ve	4214	906	7.24	99.6635	2
	CotAD_70224	At_chr8:40937943-40941923	+ve	3980	908	8.89	99.3998	2
XII_I	CotAD_00978	scaffold26.1:3337433-3344517	+ve	7084	1451	6.73	160.816	5
	CotAD_00979	scaffold26.1:3345171-3347437	+ve	2266	728	7.93	80.0961	4
	CotAD_03524	At_chr9:41760901-41763731	-ve	2830	886	6.2	97.4771	2
	CotAD_03811	Dt_chr7:6744674-6750293	-ve	5619	1228	6.01	136.089	4
	CotAD_05231	Dt_chr7:15455849-15460720	-ve	4871	1015	8.14	112.505	4
	CotAD_06159	Dt_chr13:22867991-22871252	+ve	3261	973	8.49	106.478	2
	CotAD_07244	scaffold72.1:782209-785420	-ve	3211	982	8.59	107.954	1
	CotAD_08161	Dt_chr9:37593304-37598658	-ve	5354	1097	5.78	120.76	6
	CotAD_09444	At_chr9:53758132-53761327	-ve	3195	1009	8.57	110.386	1
	CotAD_15243	scaffold413.1:1078693-1081475	+ve	2782	900	7.11	99.1448	5
	CotAD_16847	At_chr2:7303669-7307026	+ve	3357	1013	6.11	111.031	3
	CotAD_18985	Dt_chr12:17073154-17075125	-ve	1971	631	6.07	68.3396	1
	CotAD_21823	scaffold506.1:743675-745806	-ve	2131	518	6.18	57.0357	1
	CotAD_22086	Dt_chr9:31835597-31838833	-ve	3236	1026	6.45	112.843	2
	CotAD_22088	Dt_chr9:31856017-31859259	-ve	3242	1035	5.92	113.672	2
	CotAD_22290	scaffold613.1:3092-10660	-ve	7568	1539	7.51	170.039	2
	CotAD_22291	scaffold613.1:12565-15291	-ve	2726	828	6.67	90.4411	3
	CotAD_22292	scaffold613.1:20956-23594	-ve	2638	626	7.22	67.6291	2
	CotAD_22294	scaffold613.1:29578-32804	-ve	3226	1031	6.27	112.435	1
	CotAD_22295	scaffold613.1:35352-37834	-ve	2482	788	7.89	86.2995	1
	CotAD_22296	scaffold613.1:38975-42332	-ve	3357	1034	7.54	113.367	2
	CotAD_22299	scaffold613.1:61314-64531	-ve	3217	1033	7.23	112.962	2
	CotAD_22301	scaffold613.1:75429-78672	-ve	3243	1041	7.82	114.317	2
	CotAD_22302	scaffold613.1:80357-83503	-ve	3146	934	6.14	102.434	2
	CotAD_22730	Dt_chr7:24610587-24613883	-ve	3296	972	6.18	106.504	1
	CotAD_23291	At_chr2:55925933-55930467	-ve	4534	1052	6.95	116.392	4
	CotAD_24711	scaffold235.1:672767-678777	-ve	6010	1069	6.99	118.183	4
	CotAD_24714	scaffold235.1:699346-705158	-ve	5812	1012	8.4	111.625	5
	CotAD_31636	Dt_chr9:14511832-14515017	+ve	3185	1029	7.12	113.453	3
	CotAD_33139	scaffold1231.1:55086-60976	-ve	5890	1111	8.76	122.103	1
	CotAD_34157	At_chr9:30420535-30423259	-ve	2724	863	5.53	95.1071	2
	CotAD_34158	At_chr9:30305459-30308688	-ve	3229	1024	6.06	112.858	2
	CotAD_36657	scaffold1048.1:4943-8034	+ve	3091	986	6.36	108.386	2
	CotAD_36658	scaffold1048.1:16149-19316	+ve	3167	968	8.74	107.077	1
	CotAD_36659	scaffold1048.1:40170-43589	+ve	3419	1069	7.03	116.484	1
	CotAD_36660	scaffold1048.1:66113-69357	+ve	3244	1037	6.72	113.532	2
	CotAD_36664	scaffold1048.1:100613-103855	+ve	3242	1037	6.74	113.74	3
	CotAD_37359	Dt_chr2:38172766-38175874	-ve	3108	1012	6.91	110.605	4
	CotAD_38709	Dt_chr12:19547986-19551174	+ve	3188	984	5.9	107.899	2
	CotAD_41028	Dt_chr1:75477298-75481550	-ve	4252	1071	6.86	119.062	3
	CotAD_41031	Dt_chr1:75364146-75376581	-ve	12435	1307	6.41	145.457	3
	CotAD_41205	Dt_chr9:8258004-8262769	+ve	4765	619	6.61	69.4897	1
	CotAD_41214	Dt_chr9:8469293-8475069	+ve	5776	922	6.94	102.653	3
	CotAD_41216	Dt_chr9:8544560-8552491	+ve	7931	642	5.89	72.3342	1
	CotAD_43554	At_chr2:6942020-6945376	+ve	3356	1013	6.09	111.058	4
	CotAD_44689	Dt_chr6:26089931-26092888	+ve	2957	928	6.42	101.992	2
	CotAD_45931	scaffold1418.1:35064-36971	+ve	1907	544	6.97	60.1888	1
	CotAD_46130	scaffold1094.1:234298-238705	+ve	4407	1112	6.88	123.193	3
	CotAD_46131	scaffold1094.1:252262-257390	+ve	5128	1094	7.07	121.615	4
	CotAD_46153	scaffold1094.1:511070-512911	-ve	1841	613	9.02	67.2126	4
	CotAD_50180	At_chr12:71824127-71826487	+ve	2360	786	ND	ND	1
	CotAD_52268	At_chr10:20916118-20919912	+ve	3794	1164	6.13	127.68	6
	CotAD_53290	scaffold2691.1:193181-194992	-ve	1811	493	ND	ND	1
	CotAD_53449	Dt_chr10:35171523-35179497	-ve	7974	812	6.29	89.4846	4
	CotAD_55631	Dt_chr10:45988488-45992254	-ve	3766	1164	6.08	127.772	5
	CotAD_56591	scaffold2911.1:4015-10321	-ve	6306	1140	6.66	125.286	2
	CotAD_56592	scaffold2911.1:28349-31534	-ve	3185	1025	8.26	112.864	3
	CotAD_56595	scaffold2911.1:39852-43078	-ve	3226	1031	6.27	112.419	1
	CotAD_56596	scaffold2911.1:45626-48024	-ve	2398	760	7.89	83.3091	1
	CotAD_56601	scaffold2911.1:75240-78483	-ve	3243	1041	7.82	114.277	2
	CotAD_56602	scaffold2911.1:80168-83603	-ve	3435	718	7.08	79.35	2
	CotAD_56976	scaffold2541.1:9655-12822	-ve	3167	968	8.74	107.077	1
	CotAD_56979	scaffold2541.1:44409-47635	-ve	3226	1031	6.53	113.7	1
	CotAD_56980	scaffold2541.1:59318-62514	-ve	3196	1021	7.83	111.554	3
	CotAD_56981	scaffold2541.1:87124-89883	-ve	2759	876	8.03	96.5686	1
	CotAD_56982	scaffold2541.1:102985-106381	-ve	3396	1048	6.23	114.992	1
	CotAD_57447	Dt_chr9:34947394-34958972	-ve	11578	1043	5.65	114.624	7
	CotAD_59737	At_chr2:34336223-34339333	+ve	3110	972	6.9	106.165	4
	CotAD_63311	At_chr5:33547113-33549491	+ve	2378	744	7.81	82.8623	2
	CotAD_63312	At_chr5:33525384-33530496	+ve	5112	979	6.47	109.148	4
	CotAD_68508	At_chr2:6546370-6550548	-ve	4178	1089	8.04	121.736	3
	CotAD_69004	Dt_chr11:50086911-50088863	+ve	1952	441	8.64	48.0684	3
	CotAD_73467	At_chr9:25836371-25839586	-ve	3215	1039	8.11	114.089	3
	CotAD_73763	At_chr10:54097750-54100847	-ve	3097	1002	7.84	110.795	1
	CotAD_73871	scaffold5863.1:4069-7031	-ve	2962	650	6.61	71.1662	1
	CotAD_74144	scaffold4362.1:37612-39813	-ve	2201	555	7.27	61.5732	1
	CotAD_76641	At_chr12:7393067-7396248	+ve	3181	984	5.85	107.985	3
XII_II	CotAD_00148	Dt_chr9:64919193-64921831	-ve	2638	780	6.35	85.8605	4
	CotAD_00150	Dt_chr9:64928611-64935086	-ve	6475	1208	7.34	133.455	3
	CotAD_07407	At_chr9:38434512-38437668	-ve	3156	1021	5.65	112.716	5
	CotAD_07408	At_chr9:38476678-38479825	-ve	3147	1020	5.59	112.09	4
	CotAD_07409	At_chr9:38498468-38501624	-ve	3156	1021	5.58	112.546	3
	CotAD_12568	At_chr7:1577492-1581286	+ve	3794	1134	4.99	124.282	1
	CotAD_13381	Dt_chr6:42885246-42887839	+ve	2593	768	6.23	85.5846	4
	CotAD_14436	At_chr7:3385890-3389684	-ve	3794	1134	4.96	124.522	5
	CotAD_19962	At_chr6:50526430-50528613	-ve	2183	727	6.39	79.2096	4
	CotAD_19964	At_chr6:50511785-50514631	-ve	2846	920	6.36	100.984	4
	CotAD_30953	Dt_chr11:46330901-46333583	-ve	2682	756	8.87	83.3317	2
	CotAD_30976	Dt_chr11:45923011-45926658	-ve	3647	1043	6.69	114.813	3
	CotAD_30977	Dt_chr11:45875326-45878822	-ve	3496	1050	6.34	116.025	3
	CotAD_32175	Dt_chr9:54282519-54285548	-ve	3029	952	6.91	105.476	2
	CotAD_33968	scaffold643.1:330441-333211	+ve	2770	861	6.03	95.1646	3
	CotAD_49160	At_chr12:43748266-43751784	+ve	3518	788	6.21	86.9953	3
	CotAD_49489	scaffold2568.1:21630-24101	-ve	2471	773	6.54	84.8342	3
	CotAD_49490	scaffold2568.1:38016-39902	-ve	1886	391	6.56	43.0893	1
	CotAD_52223	Dt_chr6:749092-752442	+ve	3350	1029	6.16	113.63	4
	CotAD_52224	Dt_chr6:769115-772260	+ve	3145	960	6.2	105.726	5
	CotAD_52229	Dt_chr6:860016-862286	+ve	2270	673	7.02	74.9809	1
	CotAD_52231	Dt_chr6:907318-908577	+ve	1259	419	9.62	46.0297	3
	CotAD_52233	Dt_chr6:911807-914273	+ve	2466	738	7.16	82.4492	4
	CotAD_52240	Dt_chr6:951252-952852	-ve	1600	505	8.23	56.2676	1
	CotAD_52244	Dt_chr6:1038916-1041534	-ve	2618	730	6.15	80.3519	2
	CotAD_53463	Dt_chr11:47320574-47323703	-ve	3129	998	6.7	109.724	2
	CotAD_54434	At_chr10:65097397-65100549	-ve	3152	996	6.21	109.31	5
	CotAD_54435	At_chr10:65086953-65090108	-ve	3155	997	6.29	109.718	3
	CotAD_54436	At_chr10:65069851-65082864	-ve	13013	1035	6.53	113.903	3
	CotAD_54914	Dt_chr9:69538750-69545085	+ve	6335	1006	5.92	110.988	2
	CotAD_56263	At_chr8:28491886-28493637	-ve	1751	583	7.23	64.8319	3
	CotAD_56266	At_chr8:28568795-28571572	-ve	2777	659	5.95	73.058	1
	CotAD_60544	scaffold1591.1:148930-150821	+ve	1891	591	6.1	65.8986	3
	CotAD_60729	At_chr9:51848873-51851870	+ve	2997	976	6.39	107.663	3
	CotAD_60782	At_chr6:9426354-9429014	-ve	2660	872	7.14	96.753	3
	CotAD_60784	At_chr6:9480363-9481980	-ve	1617	234	9.21	25.99	1
	CotAD_60788	At_chr6:9525702-9528368	-ve	2666	708	8.15	78.0774	2
	CotAD_64227	At_chr11:4431316-4433986	+ve	2670	770	9.02	84.9277	2
	CotAD_65496	At_chr6:8982480-8985198	+ve	2718	834	5.84	92.2343	2
	CotAD_66284	At_chr13:46143994-46147374	-ve	3380	1126	5.85	122.929	7
	CotAD_66287	At_chr13:46171993-46174679	-ve	2686	799	5.76	89.1865	4
	CotAD_66289	At_chr13:46227091-46229852	-ve	2761	824	5.8	91.9835	4
	CotAD_68281	Dt_chr10:25830391-25831774	+ve	1383	433	6.64	47.9739	1
	CotAD_68282	Dt_chr10:25845816-25848807	+ve	2991	784	5.67	85.3776	2
	CotAD_69015	scaffold4104.1:68823-72541	-ve	3718	1209	6.43	132.826	3
	CotAD_70182	At_chr6:9287811-9290864	+ve	3053	823	6.86	90.5756	3
	CotAD_70369	scaffold3874.1:8005-11196	+ve	3191	1030	6.45	112.996	2
	CotAD_71506	Dt_chr6:44235709-44238661	-ve	2952	724	6.42	80.1658	2
	CotAD_71508	Dt_chr6:44246688-44248856	-ve	2168	722	8.12	79.4399	6
	CotAD_71510	Dt_chr6:44293377-44296095	-ve	2718	872	6.24	95.7414	3
	CotAD_76123	At_chr11:3581726-3585176	-ve	3450	1082	6.1	118.431	3
XIII	CotAD_01050	Dt_chr10:7735582-7741325	-ve	5743	594	5.6	65.4169	1
	CotAD_02741	Dt_chr9:41774380-41779398	+ve	5018	950	6.24	105.302	4
	CotAD_03924	Dt_chr7:7583411-7586636	-ve	3225	608	5.96	68.0421	1
	CotAD_09068	Dt_chr1:39661811-39665202	+ve	3391	604	5.89	67.2894	1
	CotAD_11428	Dt_chr6:3985839-3989050	-ve	3211	400	8.23	43.6773	1
	CotAD_18752	scaffold336.1:671575-677596	+ve	6021	889	5.75	98.1127	5
	CotAD_39964	At_chr8:38107829-38113395	-ve	5566	1829	5.51	198.872	7
	CotAD_40621	Dt_chr8:5116168-5119608	-ve	3440	1146	6.04	124.793	4
	CotAD_41227	At_chr7:4931671-4937841	+ve	6170	991	6.24	110.014	5
	CotAD_41669	scaffold1171.1:314696-320632	+ve	5936	598	5.7	65.8831	1
	CotAD_42146	scaffold349.1:644609-650491	+ve	5882	594	5.61	65.533	1
	CotAD_53851	Dt_chr10:13698778-13705244	-ve	6466	876	6.05	96.7294	3
	CotAD_71119	At_chr10:323724-330230	+ve	6506	922	6.04	101.72	2
Outgroup	CotAD_01838	Dt_chr3:11186062-11189065	-ve	3003	948	5.54	104.859	5

## Sheet: Table S2
Table S2 Gene localization and duplication data
subclade	Gene Ids	Chromosomal Location		Strand
I	CotAD_06671	Dt_chr10	18890262-18899248	+ve
	CotAD_21855	Dt_chr11	59379654-59382865	-ve
	CotAD_31444	At_chr10	74235165-74239381	+ve
	CotAD_41732	scaffold1841.1	295565-299257	+ve
	CotAD_44233	Dt_chr6	8723081-8729837	+ve
	CotAD_44784	Dt_chr1	78948595-78953095	-ve
	CotAD_51795	scaffold2321.1	132728-137234	+ve
	CotAD_51911	At_chr7	17016668-17021160	+ve
	CotAD_52119	At_chr6	54418232-54425784	-ve
	CotAD_57195	Dt_chr5	24518889-24524481	-ve
	CotAD_70912	At_chr8	23387952-23392064	-ve
	CotAD_74481	Dt_chr4	26307264-26312776	-ve
	CotAD_74959	scaffold5512.1	19230-20904	+ve
II	CotAD_00571	scaffold26.1	157281-160477	+ve
	CotAD_05290	Dt_chr7	16574434-16577563	-ve
	CotAD_09333	Dt_chr7	19257697-19260835	+ve
	CotAD_12135	Dt_chr13	50439940-50445040	-ve
	CotAD_12136	Dt_chr13	50411454-50419039	-ve
	CotAD_16150	Dt_chr13	41416492-41419477	-ve
	CotAD_19668	At_chr1	85420923-85424605	-ve
	CotAD_22753	Dt_chr7	24753674-24758706	+ve
	CotAD_23438	Dt_chr9	70045173-70048084	+ve
	CotAD_24945	At_chr7	31703898-31707939	+ve
	CotAD_28410	Dt_chr12	6406295-6411013	+ve
	CotAD_33376	At_chr13	76769709-76775717	-ve
	CotAD_33377	At_chr13	76797983-76804161	-ve
	CotAD_34384	Dt_chr7	35225282-35231291	-ve
	CotAD_34684	At_chr12	53187378-53192764	+ve
	CotAD_34685	At_chr12	53202445-53207183	+ve
	CotAD_39917	At_chr1	14559543-14565499	-ve
	CotAD_50934	Dt_chr12	29491615-29498179	-ve
	CotAD_57458	scaffold1837.1	26289-32388	+ve
	CotAD_62468	At_chr1	60793916-60799931	+ve
	CotAD_63155	At_chr9	15132000-15135156	-ve
	CotAD_64544	Dt_chr12	18512319-18515829	-ve
	CotAD_68316	At_chr12	7951486-7955008	+ve
	CotAD_69592	At_chr12	31002544-31008509	-ve
	CotAD_70108	At_chr13	57974370-57977360	+ve
	CotAD_72225	scaffold3130.1	89283-95901	+ve
	CotAD_75033	Dt_chr9	10294687-10299259	+ve
	CotAD_75189	scaffold3928.1	20202-24099	+ve
III	CotAD_00353	Dt_chr9	66460198-66462087	+ve
	CotAD_00934	scaffold26.1	2995848-2999530	+ve
	CotAD_00967	scaffold26.1	3221541-3223956	+ve
	CotAD_01535	Dt_chr9	60456916-60459127	-ve
	CotAD_01701	Dt_chr9	59084017-59088294	+ve
	CotAD_02161	Dt_chr5	18645227-18647879	-ve
	CotAD_03206	Dt_chr6	6753706-6755656	+ve
	CotAD_03665	At_chr9	42942108-42944726	-ve
	CotAD_04243	Dt_chr5	14061766-14065337	-ve
	CotAD_04319	At_chr8	78269416-78271209	-ve
	CotAD_04320	At_chr8	78263905-78267102	-ve
	CotAD_05278	Dt_chr7	16428289-16430448	+ve
	CotAD_05288	Dt_chr7	16524776-16527067	+ve
	CotAD_06952	At_chr2	12855052-12856882	-ve
	CotAD_07215	scaffold72.1	434240-436763	+ve
	CotAD_08621	Dt_chr3	23109371-23114958	-ve
	CotAD_09217	Dt_chr1	37701139-37704851	+ve
	CotAD_09352	Dt_chr7	19422107-19424266	-ve
	CotAD_09577	At_chr9	52812011-52816813	-ve
	CotAD_09713	Dt_chr9	57651858-57653851	-ve
	CotAD_12535	At_chr7	1995535-1997723	+ve
	CotAD_13103	Dt_chr8	43565120-43568762	-ve
	CotAD_14467	At_chr7	2961715-2963900	-ve
	CotAD_15200	scaffold413.1	744435-747887	+ve
	CotAD_15231	scaffold413.1	977039-979445	+ve
	CotAD_17672	At_chr10	71100922-71103502	-ve
	CotAD_17827	scaffold120.1	671650-674524	+ve
	CotAD_18413	Dt_chr9	51288977-51291087	-ve
	CotAD_18790	scaffold336.1	1020854-1028242	+ve
	CotAD_20150	Dt_chr11	57262343-57264891	+ve
	CotAD_21656	Dt_chr5	25888139-25891959	+ve
	CotAD_21953	Dt_chr11	60581743-60583758	+ve
	CotAD_22332	scaffold613.1	355359-357717	+ve
	CotAD_22998	scaffold755.1	489256-493215	-ve
	CotAD_23361	Dt_chr9	70646301-70648526	-ve
	CotAD_23850	Dt_chr10	20157665-20160225	-ve
	CotAD_24428	At_chr10	63639290-63641214	-ve
	CotAD_26081	scaffold477.1	620795-628357	+ve
	CotAD_26963	At_chr9	45035171-45037153	-ve
	CotAD_27412	Dt_chr3	39565639-39567735	+ve
	CotAD_27957	Dt_chr11	17126462-17128437	-ve
	CotAD_28297	Dt_chr2	49759130-49762277	-ve
	CotAD_29297	scaffold769.1	482895-485636	+ve
	CotAD_29800	Dt_chr2	45006372-45008202	+ve
	CotAD_30981	Dt_chr1	36887692-36891377	+ve
	CotAD_31330	Dt_chr9	53518593-53521226	-ve
	CotAD_32107	scaffold587.1	143258-146179	+ve
	CotAD_32119	scaffold587.1	230544-233446	+ve
	CotAD_33020	At_chr13	91210990-91214061	-ve
	CotAD_33544	scaffold712.1	61515-64459	-ve
	CotAD_33555	scaffold712.1	158811-161726	-ve
	CotAD_35034	Dt_chr7	26167668-26169997	+ve
	CotAD_35956	Dt_chr1	44988676-44990979	-ve
	CotAD_37063	At_chr3	43134891-43140590	-ve
	CotAD_37346	Dt_chr2	37685579-37687690	-ve
	CotAD_41057	Dt_chr1	74814976-74817672	-ve
	CotAD_43408	Dt_chr9	69115460-69117972	-ve
	CotAD_44246	Dt_chr5	58565446-58567574	+ve
	CotAD_45027	Dt_chr9	69731409-69734050	+ve
	CotAD_47120	Dt_chr13	17858868-17860781	-ve
	CotAD_50484	At_chr9	46218972-46221182	+ve
	CotAD_51936	Dt_chr10	1728671-1731316	+ve
	CotAD_52468	scaffold2285.1	228614-230690	-ve
	CotAD_53451	Dt_chr10	34822727-34824959	+ve
	CotAD_53742	Dt_chr8	8940347-8942809	+ve
	CotAD_55051	scaffold1931.1	9553-11478	+ve
	CotAD_55539	At_chr10	34862013-34864658	-ve
	CotAD_57023	At_chr13	15833093-15835011	-ve
	CotAD_57276	At_chr3	15082183-15084131	-ve
	CotAD_57664	At_chr11	24882860-24884835	+ve
	CotAD_58704	At_chr1	95133175-95135629	-ve
	CotAD_59521	At_chr10	49884245-49886349	+ve
	CotAD_60026	scaffold2235.1	153553-156995	+ve
	CotAD_60417	At_chr5	2349319-2353672	+ve
	CotAD_60775	At_chr10	79832521-79835391	+ve
	CotAD_61551	scaffold957.1	594880-596877	+ve
	CotAD_62511	At_chr12	7131822-7134110	-ve
	CotAD_62520	At_chr12	7271661-7274326	-ve
	CotAD_63572	At_chr9	50917350-50919239	-ve
	CotAD_65914	At_chr12	91634918-91638371	-ve
	CotAD_68390	At_chr1	65448671-65454859	-ve
	CotAD_68984	scaffold4246.1	66409-68519	-ve
	CotAD_69284	At_chr5	34309816-34313634	-ve
	CotAD_69922	Dt_chr7	807114-813388	-ve
	CotAD_70286	At_chr12	76811218-76814463	+ve
	CotAD_70672	Dt_chr1	18830440-18832989	-ve
	CotAD_72615	At_chr8	32905311-32907767	+ve
	CotAD_74021	At_chr10	89440550-89442782	-ve
	CotAD_74134	Dt_chr5	37753229-37755771	-ve
IV-1	CotAD_00229	Dt_chr9	65547044-65550398	-ve
	CotAD_17222	At_chr6	53026281-53029040	-ve
	CotAD_20525	Dt_chr6	11171595-11174291	-ve
	CotAD_22931	Dt_chr10	1318455-1321464	-ve
	CotAD_74113	scaffold4755.1	19220-22575	-ve
IV-2	CotAD_01210	Dt_chr10	10349898-10352274	+ve
	CotAD_21762	scaffold506.1	132521-134699	-ve
	CotAD_28062	Dt_chr8	51999110-52001690	+ve
	CotAD_42787	At_chr13	11918387-11920544	+ve
	CotAD_45995	scaffold544.1	821739-823895	+ve
	CotAD_63133	Dt_chr6	27478986-27481277	+ve
	CotAD_71255	At_chr6	20675180-20677468	+ve
V	CotAD_00712	scaffold26.1	1299390-1304149	+ve
	CotAD_00860	scaffold26.1	2519439-2523169	+ve
	CotAD_01529	Dt_chr9	60515421-60519646	-ve
	CotAD_04269	Dt_chr5	14289613-14296292	-ve
	CotAD_09747	Dt_chr9	57393001-57397852	+ve
	CotAD_17196	At_chr6	52684022-52689380	+ve
	CotAD_20501	Dt_chr6	10868256-10873481	+ve
	CotAD_26995	At_chr9	44777486-44782419	+ve
	CotAD_28859	At_chr5	47948018-47955228	-ve
	CotAD_33194	scaffold1231.1	471791-475526	+ve
	CotAD_45404	At_chr11	71632880-71638983	+ve
	CotAD_46319	scaffold1957.1	111873-116793	-ve
	CotAD_50478	At_chr9	46138755-46142571	+ve
	CotAD_52484	Dt_chr11	1047535-1053030	+ve
	CotAD_53454	Dt_chr10	34553337-34559157	+ve
	CotAD_62836	At_chr10	60505477-60510765	-ve
	CotAD_65393	At_chr10	24353932-24360051	-ve
	CotAD_68332	At_chr11	63677177-63682763	-ve
VI-1	CotAD_00160	Dt_chr9	64979940-64982498	-ve
	CotAD_45281	At_chr9	52033087-52035645	+ve
	CotAD_74115	At_chr10	82772488-82774938	-ve
	CotAD_06868	At_chr13	25417871-25420075	+ve
	CotAD_10941	At_chr6	3539725-3541932	-ve
	CotAD_47770	Dt_chr10	35901258-35903565	+ve
	CotAD_76570	At_chr10	51480457-51482765	+ve
VI-2	CotAD_01620	Dt_chr9	59728472-59732224	-ve
	CotAD_05661	At_chr9	84499280-84505673	+ve
	CotAD_08656	At_chr1	51516239-51519916	-ve
	CotAD_11338	Dt_chr6	4619848-4624676	+ve
	CotAD_17389	At_chr7	13758594-13762324	-ve
	CotAD_19795	At_chr11	7384482-7388217	-ve
	CotAD_20247	Dt_chr6	18102265-18106320	-ve
	CotAD_20384	scaffold290.1	575893-579040	-ve
	CotAD_25446	scaffold149.1	1629841-1633673	+ve
	CotAD_31999	At_chr6	42455965-42460097	+ve
	CotAD_51873	scaffold1637.1	54439-58117	+ve
	CotAD_53665	At_chr5	1723282-1726692	+ve
	CotAD_07850	scaffold104.1	472278-475759	+ve
	CotAD_07880	scaffold104.1	816267-819748	-ve
	CotAD_36271	Dt_chr12	34252061-34255144	+ve
	CotAD_47174	Dt_chr9	905164-911624	+ve
	CotAD_47824	At_chr9	1447998-1451087	-ve
	CotAD_63477	scaffold3306.1	107738-112932	-ve
	CotAD_64199	At_chr13	21090356-21094555	-ve
	CotAD_67756	Dt_chr7	41659617-41663631	-ve
	CotAD_69140	At_chr12	46126518-46129160	+ve
	CotAD_74948	At_chr12	67182667-67185934	-ve
	CotAD_75884	At_chr1	39770830-39774877	+ve
VII	CotAD_19718	At_chr11	7985297-7988655	+ve
	CotAD_20164	Dt_chr11	57574315-57577560	-ve
	CotAD_24413	At_chr10	63510594-63513843	+ve
	CotAD_25377	scaffold149.1	307558-310303	+ve
	CotAD_26531	Dt_chr6	3270191-3273240	+ve
	CotAD_27936	Dt_chr11	17603329-17606672	+ve
	CotAD_28043	Dt_chr8	52150384-52153132	+ve
	CotAD_37427	scaffold1554.1	325724-328472	-ve
	CotAD_55064	scaffold1931.1	145694-148956	-ve
	CotAD_74473	scaffold5824.1	13612-16357	-ve
	CotAD_02312	Dt_chr5	17048993-17051992	+ve
	CotAD_25309	Dt_chr7	21828064-21831450	-ve
	CotAD_33907	scaffold1588.1	199781-203068	-ve
	CotAD_38523	Dt_chr9	46627865-46631029	+ve
	CotAD_59559	At_chr9	35583473-35586898	-ve
	CotAD_66533	At_chr1	56450809-56454195	+ve
	CotAD_67251	scaffold3917.1	64187-67543	+ve
VIII-1	CotAD_18948	At_chr6	56255393-56260086	-ve
	CotAD_20224	Dt_chr6	17753395-17759656	-ve
	CotAD_21607	Dt_chr9	29488246-29494474	+ve
	CotAD_22235	Dt_chr11	3335523-3342682	+ve
	CotAD_24456	At_chr10	64140851-64145198	+ve
	CotAD_24716	scaffold235.1	733695-741246	-ve
	CotAD_24717	scaffold235.1	763906-773464	+ve
	CotAD_24718	scaffold235.1	780398-792961	+ve
	CotAD_24719	scaffold235.1	800144-812824	+ve
	CotAD_24721	scaffold235.1	829045-836750	+ve
	CotAD_25702	Dt_chr9	55575744-55583380	+ve
	CotAD_25705	Dt_chr9	55535316-55543341	+ve
	CotAD_40381	Dt_chr11	60766382-60776587	+ve
	CotAD_47800	Dt_chr10	37381787-37387091	+ve
	CotAD_47801	Dt_chr10	37389560-37400961	+ve
	CotAD_47804	Dt_chr10	37511808-37521478	-ve
	CotAD_52196	Dt_chr2	45912137-45925734	-ve
	CotAD_52283	At_chr3	2482906-2490348	-ve
	CotAD_59281	Dt_chr10	43191117-43194682	-ve
	CotAD_66457	scaffold3068.1	12496-20114	-ve
	CotAD_66459	scaffold3068.1	43200-48939	+ve
	CotAD_66464	scaffold3068.1	130905-135871	+ve
	CotAD_66465	scaffold3068.1	152814-159811	+ve
	CotAD_67284	scaffold3032.1	129572-143377	-ve
	CotAD_67647	scaffold1962.1	99201-104589	+ve
	CotAD_67655	scaffold1962.1	316835-324559	-ve
	CotAD_70461	scaffold4011.1	45228-58603	-ve
	CotAD_72038	Dt_chr11	917796-925409	-ve
	CotAD_72041	Dt_chr11	935789-942113	-ve
	CotAD_73761	scaffold4784.1	30313-37939	-ve
	CotAD_75181	At_chr2	14680351-14693340	+ve
VIII-2	CotAD_25154	At_chr9	36673629-36682365	-ve
	CotAD_27954	Dt_chr11	17190346-17195038	+ve
	CotAD_33692	scaffold1428.1	100705-107870	-ve
	CotAD_35146	scaffold1451.1	365138-377198	-ve
	CotAD_37459	Dt_chr5	56817056-56821634	+ve
	CotAD_46053	Dt_chr9	55105495-55112641	-ve
	CotAD_61336	At_chr3	9987412-9991875	+ve
	CotAD_62571	At_chr3	6668779-6676680	+ve
	CotAD_69673	At_chr6	31673373-31681131	+ve
IX	CotAD_09317	Dt_chr7	18999510-19002588	+ve
	CotAD_11871	scaffold42.1	599040-602133	+ve
	CotAD_13091	Dt_chr8	43342948-43345788	-ve
	CotAD_17108	At_chr6	51464481-51467655	-ve
	CotAD_24219	Dt_chr7	36867305-36870211	-ve
	CotAD_24493	scaffold238.1	305934-309007	+ve
	CotAD_26554	Dt_chr6	3085061-3088193	-ve
	CotAD_27211	scaffold178.1	24207-27412	-ve
	CotAD_30717	Dt_chr13	54345022-54347924	+ve
	CotAD_31541	Dt_chr6	9816348-9819522	-ve
	CotAD_33520	scaffold1051.1	417878-421119	-ve
	CotAD_36211	Dt_chr11	24516246-24519433	-ve
	CotAD_36318	At_chr6	46335851-46338991	-ve
	CotAD_46866	Dt_chr1	47792265-47795902	+ve
	CotAD_51412	At_chr1	53564833-53567917	+ve
	CotAD_52669	At_chr2	36776979-36779822	+ve
	CotAD_53070	scaffold2388.1	183469-186722	-ve
	CotAD_60611	Dt_chr1	32147183-32151028	+ve
X-I	CotAD_25896	At_chr3	19999657-20003242	-ve
	CotAD_76749	scaffold10917.1	20-3143	-ve
	CotAD_03886	Dt_chr7	7299164-7302688	-ve
X-II	CotAD_05471	Dt_chr7	4661391-4664813	+ve
	CotAD_10082	At_chr7	6944704-6947742	-ve
	CotAD_10180	At_chr7	7726812-7730671	+ve
	CotAD_13173	Dt_chr8	44300501-44303884	-ve
	CotAD_15772	Dt_chr13	38497224-38500370	-ve
	CotAD_25801	Dt_chr1	55050390-55053763	+ve
	CotAD_44726	scaffold1108.1	477729-481127	-ve
	CotAD_67300	Dt_chr1	27465240-27468600	+ve
	CotAD_70298	scaffold3441.1	127130-129892	-ve
X_III	CotAD_00975	scaffold26.1	3273445-3276702	-ve
	CotAD_05438	Dt_chr7	4261728-4263545	-ve
	CotAD_10129	At_chr7	7257634-7259902	+ve
	CotAD_15239	scaffold413.1	1026238-1027815	-ve
	CotAD_16886	At_chr2	7856283-7859441	-ve
	CotAD_18195	scaffold377.1	301913-305755	+ve
	CotAD_20733	At_chr9	47958866-47960686	-ve
	CotAD_21149	Dt_chr9	5983202-5986357	+ve
	CotAD_24661	Dt_chr5	32869800-32872838	+ve
	CotAD_25005	At_chr7	2588458-2590428	-ve
	CotAD_28712	Dt_chr1	85445069-85446889	+ve
	CotAD_37176	At_chr12	60008461-60011616	+ve
	CotAD_39293	Dt_chr2	26451561-26455145	-ve
	CotAD_45775	scaffold516.1	69564-73199	+ve
	CotAD_47479	Dt_chr9	1261323-1264958	+ve
	CotAD_47651	At_chr9	64180895-64182679	+ve
	CotAD_52735	Dt_chr4	34184398-34188225	+ve
	CotAD_55480	At_chr5	43824002-43826582	+ve
	CotAD_57105	At_chr3	93164379-93166790	-ve
	CotAD_59591	Dt_chr2	3773766-3777173	-ve
	CotAD_66191	At_chr4	15466424-15470251	+ve
	CotAD_70056	At_chr5	54134078-54137684	+ve
	CotAD_71049	At_chr1	29244598-29248182	-ve
	CotAD_72117	scaffold1876.1	23498-26908	+ve
X-IV	CotAD_13565	Dt_chr6	12415738-12418677	+ve
	CotAD_20003	At_chr6	49844392-49847331	-ve
	CotAD_20545	Dt_chr6	11438370-11441115	-ve
	CotAD_20548	Dt_chr6	11449820-11452565	-ve
	CotAD_43293	At_chr6	50713157-50715903	-ve
	CotAD_44030	Dt_chr8	9920705-9923471	-ve
	CotAD_73608	scaffold908.1	178181-181040	-ve
XI_1	CotAD_00237	Dt_chr9	65627127-65630254	+ve
	CotAD_00444	Dt_chr9	67099213-67102320	-ve
	CotAD_00656	scaffold26.1	824010-827092	+ve
	CotAD_00894	scaffold26.1	2746669-2750575	+ve
	CotAD_03099	Dt_chr5	6661722-6665700	+ve
	CotAD_03134	Dt_chr5	6482646-6486324	+ve
	CotAD_04883	scaffold56.1	752926-756103	+ve
	CotAD_05855	Dt_chr5	49964028-49967492	-ve
	CotAD_06290	Dt_chr11	4455295-4458294	+ve
	CotAD_07539	At_chr9	39945070-39948123	-ve
	CotAD_08450	Dt_chr3	25994360-25996993	-ve
	CotAD_08452	Dt_chr3	25964757-25968146	-ve
	CotAD_08453	Dt_chr3	25950148-25953424	-ve
	CotAD_10397	Dt_chr1	43483360-43486329	-ve
	CotAD_11446	Dt_chr6	3826619-3830176	-ve
	CotAD_11545	scaffold189.1	580894-584222	-ve
	CotAD_13406	Dt_chr9	52914735-52921968	+ve
	CotAD_14259	Dt_chr8	3309048-3312214	-ve
	CotAD_14939	Dt_chr12	11546347-11549752	-ve
	CotAD_14975	scaffold39.1	540220-543318	-ve
	CotAD_15034	scaffold39.1	1729330-1731780	-ve
	CotAD_15160	scaffold413.1	486343-490178	+ve
	CotAD_15853	Dt_chr12	1154667-1157579	+ve
	CotAD_16694	Dt_chr9	45978556-45981757	-ve
	CotAD_16707	Dt_chr9	45734909-45737961	-ve
	CotAD_17481	At_chr7	11408250-11412498	-ve
	CotAD_18696	scaffold336.1	61534-64671	-ve
	CotAD_20689	At_chr10	27736844-27739252	-ve
	CotAD_22778	Dt_chr7	24990825-24994688	-ve
	CotAD_23502	At_chr8	39788164-39791331	-ve
	CotAD_25642	scaffold445.1	995549-998582	+ve
	CotAD_28916	At_chr5	49163419-49166692	+ve
	CotAD_31161	At_chr9	57728095-57731094	+ve
	CotAD_31836	scaffold821.1	345688-349924	-ve
	CotAD_32393	Dt_chr5	46586630-46589095	+ve
	CotAD_32395	Dt_chr5	46526386-46529337	+ve
	CotAD_34286	At_chr11	46273997-46277099	-ve
	CotAD_34813	At_chr9	33664763-33667813	+ve
	CotAD_34828	At_chr9	34041435-34044695	+ve
	CotAD_36059	Dt_chr9	49269447-49271537	+ve
	CotAD_37125	Dt_chr8	7232757-7236071	-ve
	CotAD_39199	scaffold269.1	1004908-1008067	+ve
	CotAD_40450	scaffold2142.1	61614-65292	-ve
	CotAD_42374	Dt_chr5	61616012-61619043	+ve
	CotAD_44505	At_chr9	43558917-43568758	-ve
	CotAD_44808	Dt_chr1	79524698-79528325	+ve
	CotAD_46914	Dt_chr2	43718782-43722184	-ve
	CotAD_47446	Dt_chr9	1575227-1578139	-ve
	CotAD_47865	scaffold1213.1	340036-343184	+ve
	CotAD_47867	scaffold1213.1	373778-377168	-ve
	CotAD_47868	scaffold1213.1	399588-403035	-ve
	CotAD_48311	Dt_chr1	3819838-3823017	-ve
	CotAD_49044	Dt_chr2	8281995-8285099	-ve
	CotAD_49280	At_chr8	68185098-68187996	-ve
	CotAD_50376	Dt_chr4	4563019-4566537	-ve
	CotAD_52756	At_chr9	49428516-49431623	-ve
	CotAD_53086	At_chr3	12292265-12295225	-ve
	CotAD_53087	At_chr3	12210583-12213537	+ve
	CotAD_54399	Dt_chr7	31069921-31073397	-ve
	CotAD_55701	Dt_chr9	49536088-49539441	+ve
	CotAD_57775	At_chr3	39109426-39112890	+ve
	CotAD_57832	At_chr7	30311026-30314247	-ve
	CotAD_58185	At_chr3	33067019-33069281	+ve
	CotAD_59243	At_chr3	60553315-60556475	+ve
	CotAD_59386	At_chr3	29094330-29097361	-ve
	CotAD_62456	At_chr11	28251085-28255074	+ve
	CotAD_64056	scaffold3586.1	25714-29072	+ve
	CotAD_65075	scaffold3470.1	125547-127489	+ve
	CotAD_66780	Dt_chr11	42454409-42456879	-ve
	CotAD_68241	At_chr1	80497278-80500757	-ve
	CotAD_68701	At_chr9	34666749-34670103	-ve
	CotAD_68703	At_chr9	34677499-34679538	+ve
	CotAD_71264	At_chr1	43535236-43537644	+ve
	CotAD_71450	Dt_chr1	2157614-2161240	+ve
	CotAD_76248	At_chr11	36596247-36599756	+ve
	CotAD_76325	At_chr3	56733620-56736934	+ve
XI-2	CotAD_31665	Dt_chr8	47716179-47718110	+ve
	CotAD_01890	Dt_chr3	12437559-12439478	-ve
	CotAD_70689	At_chr5	8155403-8157410	+ve
XI_3	CotAD_00188	Dt_chr9	65225179-65228097	-ve
	CotAD_33226	Dt_chr10	29371555-29373894	+ve
	CotAD_46478	At_chr11	5397457-5400302	-ve
	CotAD_52911	Dt_chr6	2437764-2440682	+ve
XI-IV	CotAD_08372	scaffold190.1	1109897-1112951	+ve
	CotAD_09151	Dt_chr1	38517051-38521007	-ve
	CotAD_31758	Dt_chr5	9089478-9092527	-ve
	CotAD_38001	Dt_chr2	39422316-39426105	-ve
	CotAD_47429	scaffold2312.1	143782-148175	-ve
	CotAD_56131	scaffold2838.1	37817-42216	+ve
	CotAD_60304	Dt_chr13	53596975-53601219	+ve
	CotAD_69381	At_chr2	18517317-18521106	-ve
	CotAD_69974	At_chr3	97633169-97637383	+ve
	CotAD_70224	At_chr8	40937943-40941923	+ve
XII_I	CotAD_00978	scaffold26.1	3337433-3344517	-ve
	CotAD_00979	scaffold26.1	3345171-3347437	-ve
	CotAD_03524	At_chr9	41760901-41763731	-ve
	CotAD_03811	Dt_chr7	6744674-6750293	-ve
	CotAD_05231	Dt_chr7	15455849-15460720	-ve
	CotAD_06159	Dt_chr13	22867991-22871252	-ve
	CotAD_07244	scaffold72.1	782209-785420	+ve
	CotAD_08161	Dt_chr9	37593304-37598658	+ve
	CotAD_09444	At_chr9	53758132-53761327	-ve
	CotAD_15243	scaffold413.1	1078693-1081475	-ve
	CotAD_16847	At_chr2	7303669-7307026	-ve
	CotAD_18985	Dt_chr12	17073154-17075125	-ve
	CotAD_21823	scaffold506.1	743675-745806	-ve
	CotAD_22086	Dt_chr9	31835597-31838833	-ve
	CotAD_22088	Dt_chr9	31856017-31859259	-ve
	CotAD_22290	scaffold613.1	3092-10660	+ve
	CotAD_22291	scaffold613.1	12565-15291	-ve
	CotAD_22292	scaffold613.1	20956-23594	+ve
	CotAD_22294	scaffold613.1	29578-32804	+ve
	CotAD_22295	scaffold613.1	35352-37834	-ve
	CotAD_22296	scaffold613.1	38975-42332	-ve
	CotAD_22299	scaffold613.1	61314-64531	-ve
	CotAD_22301	scaffold613.1	75429-78672	-ve
	CotAD_22302	scaffold613.1	80357-83503	-ve
	CotAD_22730	Dt_chr7	24610587-24613883	-ve
	CotAD_23291	At_chr2	55925933-55930467	+ve
	CotAD_24711	scaffold235.1	672767-678777	+ve
	CotAD_24714	scaffold235.1	699346-705158	+ve
	CotAD_31636	Dt_chr9	14511832-14515017	+ve
	CotAD_33139	scaffold1231.1	55086-60976	+ve
	CotAD_34157	At_chr9	30420535-30423259	-ve
	CotAD_34158	At_chr9	30305459-30308688	-ve
	CotAD_36657	scaffold1048.1	4943-8034	-ve
	CotAD_36658	scaffold1048.1	16149-19316	-ve
	CotAD_36659	scaffold1048.1	40170-43589	+ve
	CotAD_36660	scaffold1048.1	66113-69357	-ve
	CotAD_36664	scaffold1048.1	100613-103855	+ve
	CotAD_37359	Dt_chr2	38172766-38175874	-ve
	CotAD_38709	Dt_chr12	19547986-19551174	-ve
	CotAD_41028	Dt_chr1	75477298-75481550	-ve
	CotAD_41031	Dt_chr1	75364146-75376581	-ve
	CotAD_41205	Dt_chr9	8258004-8262769	+ve
	CotAD_41214	Dt_chr9	8469293-8475069	+ve
	CotAD_41216	Dt_chr9	8544560-8552491	+ve
	CotAD_43554	At_chr2	6942020-6945376	-ve
	CotAD_44689	Dt_chr6	26089931-26092888	-ve
	CotAD_45931	scaffold1418.1	35064-36971	+ve
	CotAD_46130	scaffold1094.1	234298-238705	+ve
	CotAD_46131	scaffold1094.1	252262-257390	+ve
	CotAD_46153	scaffold1094.1	511070-512911	+ve
	CotAD_50180	At_chr12	71824127-71826487	-ve
	CotAD_52268	At_chr10	20916118-20919912	+ve
	CotAD_53290	scaffold2691.1	193181-194992	-ve
	CotAD_53449	Dt_chr10	35171523-35179497	-ve
	CotAD_55631	Dt_chr10	45988488-45992254	-ve
	CotAD_56591	scaffold2911.1	4015-10321	-ve
	CotAD_56592	scaffold2911.1	28349-31534	-ve
	CotAD_56595	scaffold2911.1	39852-43078	-ve
	CotAD_56596	scaffold2911.1	45626-48024	-ve
	CotAD_56601	scaffold2911.1	75240-78483	-ve
	CotAD_56602	scaffold2911.1	80168-83603	-ve
	CotAD_56976	scaffold2541.1	9655-12822	-ve
	CotAD_56979	scaffold2541.1	44409-47635	-ve
	CotAD_56980	scaffold2541.1	59318-62514	+ve
	CotAD_56981	scaffold2541.1	87124-89883	+ve
	CotAD_56982	scaffold2541.1	102985-106381	+ve
	CotAD_57447	Dt_chr9	34947394-34958972	-ve
	CotAD_59737	At_chr2	34336223-34339333	-ve
	CotAD_63311	At_chr5	33547113-33549491	+ve
	CotAD_63312	At_chr5	33525384-33530496	+ve
	CotAD_68508	At_chr2	6546370-6550548	-ve
	CotAD_69004	Dt_chr11	50086911-50088863	+ve
	CotAD_73467	At_chr9	25836371-25839586	-ve
	CotAD_73763	At_chr10	54097750-54100847	+ve
	CotAD_73871	scaffold5863.1	4069-7031	-ve
	CotAD_74144	scaffold4362.1	37612-39813	-ve
	CotAD_76641	At_chr12	7393067-7396248	-ve
XII_II	CotAD_00148	Dt_chr9	64919193-64921831	+ve
	CotAD_00150	Dt_chr9	64928611-64935086	+ve
	CotAD_07407	At_chr9	38434512-38437668	+ve
	CotAD_07408	At_chr9	38476678-38479825	+ve
	CotAD_07409	At_chr9	38498468-38501624	+ve
	CotAD_12568	At_chr7	1577492-1581286	-ve
	CotAD_13381	Dt_chr6	42885246-42887839	-ve
	CotAD_14436	At_chr7	3385890-3389684	-ve
	CotAD_19962	At_chr6	50526430-50528613	-ve
	CotAD_19964	At_chr6	50511785-50514631	-ve
	CotAD_30953	Dt_chr11	46330901-46333583	-ve
	CotAD_30976	Dt_chr11	45923011-45926658	-ve
	CotAD_30977	Dt_chr11	45875326-45878822	-ve
	CotAD_32175	Dt_chr9	54282519-54285548	-ve
	CotAD_33968	scaffold643.1	330441-333211	-ve
	CotAD_49160	At_chr12	43748266-43751784	+ve
	CotAD_49489	scaffold2568.1	21630-24101	+ve
	CotAD_49490	scaffold2568.1	38016-39902	-ve
	CotAD_52223	Dt_chr6	749092-752442	-ve
	CotAD_52224	Dt_chr6	769115-772260	-ve
	CotAD_52229	Dt_chr6	860016-862286	+ve
	CotAD_52231	Dt_chr6	907318-908577	+ve
	CotAD_52233	Dt_chr6	911807-914273	-ve
	CotAD_52240	Dt_chr6	951252-952852	-ve
	CotAD_52244	Dt_chr6	1038916-1041534	-ve
	CotAD_53463	Dt_chr11	47320574-47323703	+ve
	CotAD_54434	At_chr10	65097397-65100549	-ve
	CotAD_54435	At_chr10	65086953-65090108	-ve
	CotAD_54436	At_chr10	65069851-65082864	-ve
	CotAD_54914	Dt_chr9	69538750-69545085	-ve
	CotAD_56263	At_chr8	28491886-28493637	+ve
	CotAD_56266	At_chr8	28568795-28571572	+ve
	CotAD_60544	scaffold1591.1	148930-150821	+ve
	CotAD_60729	At_chr9	51848873-51851870	-ve
	CotAD_60782	At_chr6	9426354-9429014	-ve
	CotAD_60784	At_chr6	9480363-9481980	+ve
	CotAD_60788	At_chr6	9525702-9528368	+ve
	CotAD_64227	At_chr11	4431316-4433986	-ve
	CotAD_65496	At_chr6	8982480-8985198	-ve
	CotAD_66284	At_chr13	46143994-46147374	+ve
	CotAD_66287	At_chr13	46171993-46174679	-ve
	CotAD_66289	At_chr13	46227091-46229852	-ve
	CotAD_68281	Dt_chr10	25830391-25831774	-ve
	CotAD_68282	Dt_chr10	25845816-25848807	-ve
	CotAD_69015	scaffold4104.1	68823-72541	-ve
	CotAD_70182	At_chr6	9287811-9290864	-ve
	CotAD_70369	scaffold3874.1	8005-11196	-ve
	CotAD_71506	Dt_chr6	44235709-44238661	+ve
	CotAD_71508	Dt_chr6	44246688-44248856	+ve
	CotAD_71510	Dt_chr6	44293377-44296095	-ve
	CotAD_76123	At_chr11	3581726-3585176	-ve
XIII	CotAD_01050	Dt_chr10	7735582-7741325	-ve
	CotAD_02741	Dt_chr9	41774380-41779398	+ve
	CotAD_03924	Dt_chr7	7583411-7586636	-ve
	CotAD_09068	Dt_chr1	39661811-39665202	+ve
	CotAD_11428	Dt_chr6	3985839-3989050	-ve
	CotAD_18752	scaffold336.1	671575-677596	+ve
	CotAD_39964	At_chr8	38107829-38113395	-ve
	CotAD_40621	Dt_chr8	5116168-5119608	-ve
	CotAD_41227	At_chr7	4931671-4937841	+ve
	CotAD_41669	scaffold1171.1	314696-320632	+ve
	CotAD_42146	scaffold349.1	644609-650491	+ve
	CotAD_53851	Dt_chr10	13698778-13705244	-ve
	CotAD_71119	At_chr10	323724-330230	+ve
Outgroup	CotAD_01838	Dt_chr3	11186062-11189065	-ve

## Sheet: Table S3
Table S3 InterProScan analysis
Domain Distribution
InterPro ID and Domain name	number of protein	protein ID	NOTE	InterPro ID and Domain name	number of protein	protein ID	NOTE	InterPro ID and Domain name	number of protein	protein ID	NOTE	InterPro ID and Domain name	number of protein	protein ID	NOTE	InterPro ID and Domain name	number of protein	protein ID	NOTE	InterPro ID and Domain name	number of protein	protein ID	NOTE	InterPro ID and Domain name	number of protein	protein ID	NOTE	InterPro ID and Domain name	number of protein	protein ID	NOTE	InterPro ID and Domain name	number of protein	protein ID	NOTE	InterPro ID and Domain name	number of protein	protein ID	NOTE	InterPro ID and Domain name	number of protein	protein ID	NOTE	InterPro ID and Domain name	number of protein	protein ID	NOTE	InterPro ID and Domain name	number of protein
(IPR032675) Leucine-rich repeat domain, L domain-like	543	CotAD_00712, CotAD_76248, CotAD_68984, CotAD_05290, CotAD_33520, CotAD_52283, CotAD_28297, CotAD_43554, CotAD_67647, CotAD_21762, CotAD_22730, CotAD_41031, CotAD_44784, CotAD_17389, CotAD_52268, CotAD_57832, CotAD_55539, CotAD_28062, CotAD_63155, CotAD_20545, CotAD_39199, CotAD_47804, CotAD_05288, CotAD_20548, CotAD_67756, CotAD_41028, CotAD_47800, CotAD_47801, CotAD_19795, CotAD_00934, CotAD_699…		(IPR032675) Leucine-rich repeat domain, L domain-like	543	CotAD_00712, CotAD_76248, CotAD_68984, CotAD_05290, CotAD_33520, CotAD_52283, CotAD_28297, CotAD_43554, CotAD_67647, CotAD_21762, CotAD_22730, CotAD_41031, CotAD_44784, CotAD_17389, CotAD_52268, CotAD_57832, CotAD_55539, CotAD_28062, CotAD_63155, CotAD_20545, CotAD_39199, CotAD_47804, CotAD_05288, CotAD_20548, CotAD_67756, CotAD_41028, CotAD_47800, CotAD_47801, CotAD_19795, CotAD_00934, CotAD_699…		(IPR032675) Leucine-rich repeat domain, L domain-like	543	CotAD_00712, CotAD_76248, CotAD_68984, CotAD_05290, CotAD_33520, CotAD_52283, CotAD_28297, CotAD_43554, CotAD_67647, CotAD_21762, CotAD_22730, CotAD_41031, CotAD_44784, CotAD_17389, CotAD_52268, CotAD_57832, CotAD_55539, CotAD_28062, CotAD_63155, CotAD_20545, CotAD_39199, CotAD_47804, CotAD_05288, CotAD_20548, CotAD_67756, CotAD_41028, CotAD_47800, CotAD_47801, CotAD_19795, CotAD_00934, CotAD_699…		(IPR032675) Leucine-rich repeat domain, L domain-like	543	CotAD_00712, CotAD_76248, CotAD_68984, CotAD_05290, CotAD_33520, CotAD_52283, CotAD_28297, CotAD_43554, CotAD_67647, CotAD_21762, CotAD_22730, CotAD_41031, CotAD_44784, CotAD_17389, CotAD_52268, CotAD_57832, CotAD_55539, CotAD_28062, CotAD_63155, CotAD_20545, CotAD_39199, CotAD_47804, CotAD_05288, CotAD_20548, CotAD_67756, CotAD_41028, CotAD_47800, CotAD_47801, CotAD_19795, CotAD_00934, CotAD_699…		(IPR032675) Leucine-rich repeat domain, L domain-like	543	CotAD_00712, CotAD_76248, CotAD_68984, CotAD_05290, CotAD_33520, CotAD_52283, CotAD_28297, CotAD_43554, CotAD_67647, CotAD_21762, CotAD_22730, CotAD_41031, CotAD_44784, CotAD_17389, CotAD_52268, CotAD_57832, CotAD_55539, CotAD_28062, CotAD_63155, CotAD_20545, CotAD_39199, CotAD_47804, CotAD_05288, CotAD_20548, CotAD_67756, CotAD_41028, CotAD_47800, CotAD_47801, CotAD_19795, CotAD_00934, CotAD_699…		(IPR032675) Leucine-rich repeat domain, L domain-like	543	CotAD_00712, CotAD_76248, CotAD_68984, CotAD_05290, CotAD_33520, CotAD_52283, CotAD_28297, CotAD_43554, CotAD_67647, CotAD_21762, CotAD_22730, CotAD_41031, CotAD_44784, CotAD_17389, CotAD_52268, CotAD_57832, CotAD_55539, CotAD_28062, CotAD_63155, CotAD_20545, CotAD_39199, CotAD_47804, CotAD_05288, CotAD_20548, CotAD_67756, CotAD_41028, CotAD_47800, CotAD_47801, CotAD_19795, CotAD_00934, CotAD_699…		(IPR032675) Leucine-rich repeat domain, L domain-like	543	CotAD_00712, CotAD_76248, CotAD_68984, CotAD_05290, CotAD_33520, CotAD_52283, CotAD_28297, CotAD_43554, CotAD_67647, CotAD_21762, CotAD_22730, CotAD_41031, CotAD_44784, CotAD_17389, CotAD_52268, CotAD_57832, CotAD_55539, CotAD_28062, CotAD_63155, CotAD_20545, CotAD_39199, CotAD_47804, CotAD_05288, CotAD_20548, CotAD_67756, CotAD_41028, CotAD_47800, CotAD_47801, CotAD_19795, CotAD_00934, CotAD_699…		(IPR032675) Leucine-rich repeat domain, L domain-like	543	CotAD_00712, CotAD_76248, CotAD_68984, CotAD_05290, CotAD_33520, CotAD_52283, CotAD_28297, CotAD_43554, CotAD_67647, CotAD_21762, CotAD_22730, CotAD_41031, CotAD_44784, CotAD_17389, CotAD_52268, CotAD_57832, CotAD_55539, CotAD_28062, CotAD_63155, CotAD_20545, CotAD_39199, CotAD_47804, CotAD_05288, CotAD_20548, CotAD_67756, CotAD_41028, CotAD_47800, CotAD_47801, CotAD_19795, CotAD_00934, CotAD_699…		(IPR032675) Leucine-rich repeat domain, L domain-like	543	CotAD_00712, CotAD_76248, CotAD_68984, CotAD_05290, CotAD_33520, CotAD_52283, CotAD_28297, CotAD_43554, CotAD_67647, CotAD_21762, CotAD_22730, CotAD_41031, CotAD_44784, CotAD_17389, CotAD_52268, CotAD_57832, CotAD_55539, CotAD_28062, CotAD_63155, CotAD_20545, CotAD_39199, CotAD_47804, CotAD_05288, CotAD_20548, CotAD_67756, CotAD_41028, CotAD_47800, CotAD_47801, CotAD_19795, CotAD_00934, CotAD_699…		(IPR032675) Leucine-rich repeat domain, L domain-like	543	CotAD_00712, CotAD_76248, CotAD_68984, CotAD_05290, CotAD_33520, CotAD_52283, CotAD_28297, CotAD_43554, CotAD_67647, CotAD_21762, CotAD_22730, CotAD_41031, CotAD_44784, CotAD_17389, CotAD_52268, CotAD_57832, CotAD_55539, CotAD_28062, CotAD_63155, CotAD_20545, CotAD_39199, CotAD_47804, CotAD_05288, CotAD_20548, CotAD_67756, CotAD_41028, CotAD_47800, CotAD_47801, CotAD_19795, CotAD_00934, CotAD_699…		(IPR032675) Leucine-rich repeat domain, L domain-like	543	CotAD_00712, CotAD_76248, CotAD_68984, CotAD_05290, CotAD_33520, CotAD_52283, CotAD_28297, CotAD_43554, CotAD_67647, CotAD_21762, CotAD_22730, CotAD_41031, CotAD_44784, CotAD_17389, CotAD_52268, CotAD_57832, CotAD_55539, CotAD_28062, CotAD_63155, CotAD_20545, CotAD_39199, CotAD_47804, CotAD_05288, CotAD_20548, CotAD_67756, CotAD_41028, CotAD_47800, CotAD_47801, CotAD_19795, CotAD_00934, CotAD_699…		(IPR032675) Leucine-rich repeat domain, L domain-like	543	CotAD_00712, CotAD_76248, CotAD_68984, CotAD_05290, CotAD_33520, CotAD_52283, CotAD_28297, CotAD_43554, CotAD_67647, CotAD_21762, CotAD_22730, CotAD_41031, CotAD_44784, CotAD_17389, CotAD_52268, CotAD_57832, CotAD_55539, CotAD_28062, CotAD_63155, CotAD_20545, CotAD_39199, CotAD_47804, CotAD_05288, CotAD_20548, CotAD_67756, CotAD_41028, CotAD_47800, CotAD_47801, CotAD_19795, CotAD_00934, CotAD_699…		(IPR032675) Leucine-rich repeat domain, L domain-like	543
(IPR011009) Protein kinase-like domain	542	CotAD_00712, CotAD_76248, CotAD_68984, CotAD_05290, CotAD_33520, CotAD_52283, CotAD_28297, CotAD_43554, CotAD_67647, CotAD_21762, CotAD_22730, CotAD_41031, CotAD_44784, CotAD_17389, CotAD_52268, CotAD_57832, CotAD_55539, CotAD_28062, CotAD_63155, CotAD_20545, CotAD_39199, CotAD_47804, CotAD_05288, CotAD_20548, CotAD_67756, CotAD_41028, CotAD_47800, CotAD_47801, CotAD_19795, CotAD_00934, CotAD_699…	Cot_AD1838 (out group) has no IPR011009	(IPR011009) Protein kinase-like domain	542	CotAD_00712, CotAD_76248, CotAD_68984, CotAD_05290, CotAD_33520, CotAD_52283, CotAD_28297, CotAD_43554, CotAD_67647, CotAD_21762, CotAD_22730, CotAD_41031, CotAD_44784, CotAD_17389, CotAD_52268, CotAD_57832, CotAD_55539, CotAD_28062, CotAD_63155, CotAD_20545, CotAD_39199, CotAD_47804, CotAD_05288, CotAD_20548, CotAD_67756, CotAD_41028, CotAD_47800, CotAD_47801, CotAD_19795, CotAD_00934, CotAD_699…	Cot_AD1838 (out group) has no IPR011009	(IPR011009) Protein kinase-like domain	542	CotAD_00712, CotAD_76248, CotAD_68984, CotAD_05290, CotAD_33520, CotAD_52283, CotAD_28297, CotAD_43554, CotAD_67647, CotAD_21762, CotAD_22730, CotAD_41031, CotAD_44784, CotAD_17389, CotAD_52268, CotAD_57832, CotAD_55539, CotAD_28062, CotAD_63155, CotAD_20545, CotAD_39199, CotAD_47804, CotAD_05288, CotAD_20548, CotAD_67756, CotAD_41028, CotAD_47800, CotAD_47801, CotAD_19795, CotAD_00934, CotAD_699…	Cot_AD1838 (out group) has no IPR011009	(IPR011009) Protein kinase-like domain	542	CotAD_00712, CotAD_76248, CotAD_68984, CotAD_05290, CotAD_33520, CotAD_52283, CotAD_28297, CotAD_43554, CotAD_67647, CotAD_21762, CotAD_22730, CotAD_41031, CotAD_44784, CotAD_17389, CotAD_52268, CotAD_57832, CotAD_55539, CotAD_28062, CotAD_63155, CotAD_20545, CotAD_39199, CotAD_47804, CotAD_05288, CotAD_20548, CotAD_67756, CotAD_41028, CotAD_47800, CotAD_47801, CotAD_19795, CotAD_00934, CotAD_699…	Cot_AD1838 (out group) has no IPR011009	(IPR011009) Protein kinase-like domain	542	CotAD_00712, CotAD_76248, CotAD_68984, CotAD_05290, CotAD_33520, CotAD_52283, CotAD_28297, CotAD_43554, CotAD_67647, CotAD_21762, CotAD_22730, CotAD_41031, CotAD_44784, CotAD_17389, CotAD_52268, CotAD_57832, CotAD_55539, CotAD_28062, CotAD_63155, CotAD_20545, CotAD_39199, CotAD_47804, CotAD_05288, CotAD_20548, CotAD_67756, CotAD_41028, CotAD_47800, CotAD_47801, CotAD_19795, CotAD_00934, CotAD_699…	Cot_AD1838 (out group) has no IPR011009	(IPR011009) Protein kinase-like domain	542	CotAD_00712, CotAD_76248, CotAD_68984, CotAD_05290, CotAD_33520, CotAD_52283, CotAD_28297, CotAD_43554, CotAD_67647, CotAD_21762, CotAD_22730, CotAD_41031, CotAD_44784, CotAD_17389, CotAD_52268, CotAD_57832, CotAD_55539, CotAD_28062, CotAD_63155, CotAD_20545, CotAD_39199, CotAD_47804, CotAD_05288, CotAD_20548, CotAD_67756, CotAD_41028, CotAD_47800, CotAD_47801, CotAD_19795, CotAD_00934, CotAD_699…	Cot_AD1838 (out group) has no IPR011009	(IPR011009) Protein kinase-like domain	542	CotAD_00712, CotAD_76248, CotAD_68984, CotAD_05290, CotAD_33520, CotAD_52283, CotAD_28297, CotAD_43554, CotAD_67647, CotAD_21762, CotAD_22730, CotAD_41031, CotAD_44784, CotAD_17389, CotAD_52268, CotAD_57832, CotAD_55539, CotAD_28062, CotAD_63155, CotAD_20545, CotAD_39199, CotAD_47804, CotAD_05288, CotAD_20548, CotAD_67756, CotAD_41028, CotAD_47800, CotAD_47801, CotAD_19795, CotAD_00934, CotAD_699…	Cot_AD1838 (out group) has no IPR011009	(IPR011009) Protein kinase-like domain	542	CotAD_00712, CotAD_76248, CotAD_68984, CotAD_05290, CotAD_33520, CotAD_52283, CotAD_28297, CotAD_43554, CotAD_67647, CotAD_21762, CotAD_22730, CotAD_41031, CotAD_44784, CotAD_17389, CotAD_52268, CotAD_57832, CotAD_55539, CotAD_28062, CotAD_63155, CotAD_20545, CotAD_39199, CotAD_47804, CotAD_05288, CotAD_20548, CotAD_67756, CotAD_41028, CotAD_47800, CotAD_47801, CotAD_19795, CotAD_00934, CotAD_699…	Cot_AD1838 (out group) has no IPR011009	(IPR011009) Protein kinase-like domain	542	CotAD_00712, CotAD_76248, CotAD_68984, CotAD_05290, CotAD_33520, CotAD_52283, CotAD_28297, CotAD_43554, CotAD_67647, CotAD_21762, CotAD_22730, CotAD_41031, CotAD_44784, CotAD_17389, CotAD_52268, CotAD_57832, CotAD_55539, CotAD_28062, CotAD_63155, CotAD_20545, CotAD_39199, CotAD_47804, CotAD_05288, CotAD_20548, CotAD_67756, CotAD_41028, CotAD_47800, CotAD_47801, CotAD_19795, CotAD_00934, CotAD_699…	Cot_AD1838 (out group) has no IPR011009	(IPR011009) Protein kinase-like domain	542	CotAD_00712, CotAD_76248, CotAD_68984, CotAD_05290, CotAD_33520, CotAD_52283, CotAD_28297, CotAD_43554, CotAD_67647, CotAD_21762, CotAD_22730, CotAD_41031, CotAD_44784, CotAD_17389, CotAD_52268, CotAD_57832, CotAD_55539, CotAD_28062, CotAD_63155, CotAD_20545, CotAD_39199, CotAD_47804, CotAD_05288, CotAD_20548, CotAD_67756, CotAD_41028, CotAD_47800, CotAD_47801, CotAD_19795, CotAD_00934, CotAD_699…	Cot_AD1838 (out group) has no IPR011009	(IPR011009) Protein kinase-like domain	542	CotAD_00712, CotAD_76248, CotAD_68984, CotAD_05290, CotAD_33520, CotAD_52283, CotAD_28297, CotAD_43554, CotAD_67647, CotAD_21762, CotAD_22730, CotAD_41031, CotAD_44784, CotAD_17389, CotAD_52268, CotAD_57832, CotAD_55539, CotAD_28062, CotAD_63155, CotAD_20545, CotAD_39199, CotAD_47804, CotAD_05288, CotAD_20548, CotAD_67756, CotAD_41028, CotAD_47800, CotAD_47801, CotAD_19795, CotAD_00934, CotAD_699…	Cot_AD1838 (out group) has no IPR011009	(IPR011009) Protein kinase-like domain	542	CotAD_00712, CotAD_76248, CotAD_68984, CotAD_05290, CotAD_33520, CotAD_52283, CotAD_28297, CotAD_43554, CotAD_67647, CotAD_21762, CotAD_22730, CotAD_41031, CotAD_44784, CotAD_17389, CotAD_52268, CotAD_57832, CotAD_55539, CotAD_28062, CotAD_63155, CotAD_20545, CotAD_39199, CotAD_47804, CotAD_05288, CotAD_20548, CotAD_67756, CotAD_41028, CotAD_47800, CotAD_47801, CotAD_19795, CotAD_00934, CotAD_699…	Cot_AD1838 (out group) has no IPR011009	(IPR011009) Protein kinase-like domain	542
(IPR000719) Protein kinase domain	540	CotAD_00712, CotAD_76248, CotAD_68984, CotAD_05290, CotAD_33520, CotAD_52283, CotAD_28297, CotAD_43554, CotAD_67647, CotAD_21762, CotAD_22730, CotAD_41031, CotAD_44784, CotAD_17389, CotAD_52268, CotAD_57832, CotAD_55539, CotAD_28062, CotAD_63155, CotAD_20545, CotAD_39199, CotAD_47804, CotAD_05288, CotAD_20548, CotAD_67756, CotAD_41028, CotAD_47800, CotAD_47801, CotAD_19795, CotAD_00934, CotAD_699…	CotAD_01838 CotAD_60784 CotAD_51873 have no IPR000719	(IPR000719) Protein kinase domain	540	CotAD_00712, CotAD_76248, CotAD_68984, CotAD_05290, CotAD_33520, CotAD_52283, CotAD_28297, CotAD_43554, CotAD_67647, CotAD_21762, CotAD_22730, CotAD_41031, CotAD_44784, CotAD_17389, CotAD_52268, CotAD_57832, CotAD_55539, CotAD_28062, CotAD_63155, CotAD_20545, CotAD_39199, CotAD_47804, CotAD_05288, CotAD_20548, CotAD_67756, CotAD_41028, CotAD_47800, CotAD_47801, CotAD_19795, CotAD_00934, CotAD_699…	CotAD_01838 CotAD_60784 CotAD_51873 have no IPR000719	(IPR000719) Protein kinase domain	540	CotAD_00712, CotAD_76248, CotAD_68984, CotAD_05290, CotAD_33520, CotAD_52283, CotAD_28297, CotAD_43554, CotAD_67647, CotAD_21762, CotAD_22730, CotAD_41031, CotAD_44784, CotAD_17389, CotAD_52268, CotAD_57832, CotAD_55539, CotAD_28062, CotAD_63155, CotAD_20545, CotAD_39199, CotAD_47804, CotAD_05288, CotAD_20548, CotAD_67756, CotAD_41028, CotAD_47800, CotAD_47801, CotAD_19795, CotAD_00934, CotAD_699…	CotAD_01838 CotAD_60784 CotAD_51873 have no IPR000719	(IPR000719) Protein kinase domain	540	CotAD_00712, CotAD_76248, CotAD_68984, CotAD_05290, CotAD_33520, CotAD_52283, CotAD_28297, CotAD_43554, CotAD_67647, CotAD_21762, CotAD_22730, CotAD_41031, CotAD_44784, CotAD_17389, CotAD_52268, CotAD_57832, CotAD_55539, CotAD_28062, CotAD_63155, CotAD_20545, CotAD_39199, CotAD_47804, CotAD_05288, CotAD_20548, CotAD_67756, CotAD_41028, CotAD_47800, CotAD_47801, CotAD_19795, CotAD_00934, CotAD_699…	CotAD_01838 CotAD_60784 CotAD_51873 have no IPR000719	(IPR000719) Protein kinase domain	540	CotAD_00712, CotAD_76248, CotAD_68984, CotAD_05290, CotAD_33520, CotAD_52283, CotAD_28297, CotAD_43554, CotAD_67647, CotAD_21762, CotAD_22730, CotAD_41031, CotAD_44784, CotAD_17389, CotAD_52268, CotAD_57832, CotAD_55539, CotAD_28062, CotAD_63155, CotAD_20545, CotAD_39199, CotAD_47804, CotAD_05288, CotAD_20548, CotAD_67756, CotAD_41028, CotAD_47800, CotAD_47801, CotAD_19795, CotAD_00934, CotAD_699…	CotAD_01838 CotAD_60784 CotAD_51873 have no IPR000719	(IPR000719) Protein kinase domain	540	CotAD_00712, CotAD_76248, CotAD_68984, CotAD_05290, CotAD_33520, CotAD_52283, CotAD_28297, CotAD_43554, CotAD_67647, CotAD_21762, CotAD_22730, CotAD_41031, CotAD_44784, CotAD_17389, CotAD_52268, CotAD_57832, CotAD_55539, CotAD_28062, CotAD_63155, CotAD_20545, CotAD_39199, CotAD_47804, CotAD_05288, CotAD_20548, CotAD_67756, CotAD_41028, CotAD_47800, CotAD_47801, CotAD_19795, CotAD_00934, CotAD_699…	CotAD_01838 CotAD_60784 CotAD_51873 have no IPR000719	(IPR000719) Protein kinase domain	540	CotAD_00712, CotAD_76248, CotAD_68984, CotAD_05290, CotAD_33520, CotAD_52283, CotAD_28297, CotAD_43554, CotAD_67647, CotAD_21762, CotAD_22730, CotAD_41031, CotAD_44784, CotAD_17389, CotAD_52268, CotAD_57832, CotAD_55539, CotAD_28062, CotAD_63155, CotAD_20545, CotAD_39199, CotAD_47804, CotAD_05288, CotAD_20548, CotAD_67756, CotAD_41028, CotAD_47800, CotAD_47801, CotAD_19795, CotAD_00934, CotAD_699…	CotAD_01838 CotAD_60784 CotAD_51873 have no IPR000719	(IPR000719) Protein kinase domain	540	CotAD_00712, CotAD_76248, CotAD_68984, CotAD_05290, CotAD_33520, CotAD_52283, CotAD_28297, CotAD_43554, CotAD_67647, CotAD_21762, CotAD_22730, CotAD_41031, CotAD_44784, CotAD_17389, CotAD_52268, CotAD_57832, CotAD_55539, CotAD_28062, CotAD_63155, CotAD_20545, CotAD_39199, CotAD_47804, CotAD_05288, CotAD_20548, CotAD_67756, CotAD_41028, CotAD_47800, CotAD_47801, CotAD_19795, CotAD_00934, CotAD_699…	CotAD_01838 CotAD_60784 CotAD_51873 have no IPR000719	(IPR000719) Protein kinase domain	540	CotAD_00712, CotAD_76248, CotAD_68984, CotAD_05290, CotAD_33520, CotAD_52283, CotAD_28297, CotAD_43554, CotAD_67647, CotAD_21762, CotAD_22730, CotAD_41031, CotAD_44784, CotAD_17389, CotAD_52268, CotAD_57832, CotAD_55539, CotAD_28062, CotAD_63155, CotAD_20545, CotAD_39199, CotAD_47804, CotAD_05288, CotAD_20548, CotAD_67756, CotAD_41028, CotAD_47800, CotAD_47801, CotAD_19795, CotAD_00934, CotAD_699…	CotAD_01838 CotAD_60784 CotAD_51873 have no IPR000719	(IPR000719) Protein kinase domain	540	CotAD_00712, CotAD_76248, CotAD_68984, CotAD_05290, CotAD_33520, CotAD_52283, CotAD_28297, CotAD_43554, CotAD_67647, CotAD_21762, CotAD_22730, CotAD_41031, CotAD_44784, CotAD_17389, CotAD_52268, CotAD_57832, CotAD_55539, CotAD_28062, CotAD_63155, CotAD_20545, CotAD_39199, CotAD_47804, CotAD_05288, CotAD_20548, CotAD_67756, CotAD_41028, CotAD_47800, CotAD_47801, CotAD_19795, CotAD_00934, CotAD_699…	CotAD_01838 CotAD_60784 CotAD_51873 have no IPR000719	(IPR000719) Protein kinase domain	540	CotAD_00712, CotAD_76248, CotAD_68984, CotAD_05290, CotAD_33520, CotAD_52283, CotAD_28297, CotAD_43554, CotAD_67647, CotAD_21762, CotAD_22730, CotAD_41031, CotAD_44784, CotAD_17389, CotAD_52268, CotAD_57832, CotAD_55539, CotAD_28062, CotAD_63155, CotAD_20545, CotAD_39199, CotAD_47804, CotAD_05288, CotAD_20548, CotAD_67756, CotAD_41028, CotAD_47800, CotAD_47801, CotAD_19795, CotAD_00934, CotAD_699…	CotAD_01838 CotAD_60784 CotAD_51873 have no IPR000719	(IPR000719) Protein kinase domain	540	CotAD_00712, CotAD_76248, CotAD_68984, CotAD_05290, CotAD_33520, CotAD_52283, CotAD_28297, CotAD_43554, CotAD_67647, CotAD_21762, CotAD_22730, CotAD_41031, CotAD_44784, CotAD_17389, CotAD_52268, CotAD_57832, CotAD_55539, CotAD_28062, CotAD_63155, CotAD_20545, CotAD_39199, CotAD_47804, CotAD_05288, CotAD_20548, CotAD_67756, CotAD_41028, CotAD_47800, CotAD_47801, CotAD_19795, CotAD_00934, CotAD_699…	CotAD_01838 CotAD_60784 CotAD_51873 have no IPR000719	(IPR000719) Protein kinase domain	540
(IPR013210) Leucine-rich repeat-containing N-terminal, plant-type	376	CotAD_00712, CotAD_76248, CotAD_71119, CotAD_15772, CotAD_14436, CotAD_35146, CotAD_05290, CotAD_33520, CotAD_62511, CotAD_28297, CotAD_04883, CotAD_10082, CotAD_43554, CotAD_05855, CotAD_21762, CotAD_59591, CotAD_25446, CotAD_28859, CotAD_22299, CotAD_22294, CotAD_26531, CotAD_41031, CotAD_22296, CotAD_22290, CotAD_17389, CotAD_22291, CotAD_52268, CotAD_57832, CotAD_55539, CotAD_12136, CotAD_121…		(IPR013210) Leucine-rich repeat-containing N-terminal, plant-type	376	CotAD_00712, CotAD_76248, CotAD_71119, CotAD_15772, CotAD_14436, CotAD_35146, CotAD_05290, CotAD_33520, CotAD_62511, CotAD_28297, CotAD_04883, CotAD_10082, CotAD_43554, CotAD_05855, CotAD_21762, CotAD_59591, CotAD_25446, CotAD_28859, CotAD_22299, CotAD_22294, CotAD_26531, CotAD_41031, CotAD_22296, CotAD_22290, CotAD_17389, CotAD_22291, CotAD_52268, CotAD_57832, CotAD_55539, CotAD_12136, CotAD_121…		(IPR013210) Leucine-rich repeat-containing N-terminal, plant-type	376	CotAD_00712, CotAD_76248, CotAD_71119, CotAD_15772, CotAD_14436, CotAD_35146, CotAD_05290, CotAD_33520, CotAD_62511, CotAD_28297, CotAD_04883, CotAD_10082, CotAD_43554, CotAD_05855, CotAD_21762, CotAD_59591, CotAD_25446, CotAD_28859, CotAD_22299, CotAD_22294, CotAD_26531, CotAD_41031, CotAD_22296, CotAD_22290, CotAD_17389, CotAD_22291, CotAD_52268, CotAD_57832, CotAD_55539, CotAD_12136, CotAD_121…		(IPR013210) Leucine-rich repeat-containing N-terminal, plant-type	376	CotAD_00712, CotAD_76248, CotAD_71119, CotAD_15772, CotAD_14436, CotAD_35146, CotAD_05290, CotAD_33520, CotAD_62511, CotAD_28297, CotAD_04883, CotAD_10082, CotAD_43554, CotAD_05855, CotAD_21762, CotAD_59591, CotAD_25446, CotAD_28859, CotAD_22299, CotAD_22294, CotAD_26531, CotAD_41031, CotAD_22296, CotAD_22290, CotAD_17389, CotAD_22291, CotAD_52268, CotAD_57832, CotAD_55539, CotAD_12136, CotAD_121…		(IPR013210) Leucine-rich repeat-containing N-terminal, plant-type	376	CotAD_00712, CotAD_76248, CotAD_71119, CotAD_15772, CotAD_14436, CotAD_35146, CotAD_05290, CotAD_33520, CotAD_62511, CotAD_28297, CotAD_04883, CotAD_10082, CotAD_43554, CotAD_05855, CotAD_21762, CotAD_59591, CotAD_25446, CotAD_28859, CotAD_22299, CotAD_22294, CotAD_26531, CotAD_41031, CotAD_22296, CotAD_22290, CotAD_17389, CotAD_22291, CotAD_52268, CotAD_57832, CotAD_55539, CotAD_12136, CotAD_121…		(IPR013210) Leucine-rich repeat-containing N-terminal, plant-type	376	CotAD_00712, CotAD_76248, CotAD_71119, CotAD_15772, CotAD_14436, CotAD_35146, CotAD_05290, CotAD_33520, CotAD_62511, CotAD_28297, CotAD_04883, CotAD_10082, CotAD_43554, CotAD_05855, CotAD_21762, CotAD_59591, CotAD_25446, CotAD_28859, CotAD_22299, CotAD_22294, CotAD_26531, CotAD_41031, CotAD_22296, CotAD_22290, CotAD_17389, CotAD_22291, CotAD_52268, CotAD_57832, CotAD_55539, CotAD_12136, CotAD_121…		(IPR013210) Leucine-rich repeat-containing N-terminal, plant-type	376	CotAD_00712, CotAD_76248, CotAD_71119, CotAD_15772, CotAD_14436, CotAD_35146, CotAD_05290, CotAD_33520, CotAD_62511, CotAD_28297, CotAD_04883, CotAD_10082, CotAD_43554, CotAD_05855, CotAD_21762, CotAD_59591, CotAD_25446, CotAD_28859, CotAD_22299, CotAD_22294, CotAD_26531, CotAD_41031, CotAD_22296, CotAD_22290, CotAD_17389, CotAD_22291, CotAD_52268, CotAD_57832, CotAD_55539, CotAD_12136, CotAD_121…		(IPR013210) Leucine-rich repeat-containing N-terminal, plant-type	376	CotAD_00712, CotAD_76248, CotAD_71119, CotAD_15772, CotAD_14436, CotAD_35146, CotAD_05290, CotAD_33520, CotAD_62511, CotAD_28297, CotAD_04883, CotAD_10082, CotAD_43554, CotAD_05855, CotAD_21762, CotAD_59591, CotAD_25446, CotAD_28859, CotAD_22299, CotAD_22294, CotAD_26531, CotAD_41031, CotAD_22296, CotAD_22290, CotAD_17389, CotAD_22291, CotAD_52268, CotAD_57832, CotAD_55539, CotAD_12136, CotAD_121…		(IPR013210) Leucine-rich repeat-containing N-terminal, plant-type	376	CotAD_00712, CotAD_76248, CotAD_71119, CotAD_15772, CotAD_14436, CotAD_35146, CotAD_05290, CotAD_33520, CotAD_62511, CotAD_28297, CotAD_04883, CotAD_10082, CotAD_43554, CotAD_05855, CotAD_21762, CotAD_59591, CotAD_25446, CotAD_28859, CotAD_22299, CotAD_22294, CotAD_26531, CotAD_41031, CotAD_22296, CotAD_22290, CotAD_17389, CotAD_22291, CotAD_52268, CotAD_57832, CotAD_55539, CotAD_12136, CotAD_121…		(IPR013210) Leucine-rich repeat-containing N-terminal, plant-type	376	CotAD_00712, CotAD_76248, CotAD_71119, CotAD_15772, CotAD_14436, CotAD_35146, CotAD_05290, CotAD_33520, CotAD_62511, CotAD_28297, CotAD_04883, CotAD_10082, CotAD_43554, CotAD_05855, CotAD_21762, CotAD_59591, CotAD_25446, CotAD_28859, CotAD_22299, CotAD_22294, CotAD_26531, CotAD_41031, CotAD_22296, CotAD_22290, CotAD_17389, CotAD_22291, CotAD_52268, CotAD_57832, CotAD_55539, CotAD_12136, CotAD_121…		(IPR013210) Leucine-rich repeat-containing N-terminal, plant-type	376	CotAD_00712, CotAD_76248, CotAD_71119, CotAD_15772, CotAD_14436, CotAD_35146, CotAD_05290, CotAD_33520, CotAD_62511, CotAD_28297, CotAD_04883, CotAD_10082, CotAD_43554, CotAD_05855, CotAD_21762, CotAD_59591, CotAD_25446, CotAD_28859, CotAD_22299, CotAD_22294, CotAD_26531, CotAD_41031, CotAD_22296, CotAD_22290, CotAD_17389, CotAD_22291, CotAD_52268, CotAD_57832, CotAD_55539, CotAD_12136, CotAD_121…		(IPR013210) Leucine-rich repeat-containing N-terminal, plant-type	376	CotAD_00712, CotAD_76248, CotAD_71119, CotAD_15772, CotAD_14436, CotAD_35146, CotAD_05290, CotAD_33520, CotAD_62511, CotAD_28297, CotAD_04883, CotAD_10082, CotAD_43554, CotAD_05855, CotAD_21762, CotAD_59591, CotAD_25446, CotAD_28859, CotAD_22299, CotAD_22294, CotAD_26531, CotAD_41031, CotAD_22296, CotAD_22290, CotAD_17389, CotAD_22291, CotAD_52268, CotAD_57832, CotAD_55539, CotAD_12136, CotAD_121…		(IPR013210) Leucine-rich repeat-containing N-terminal, plant-type	376
(IPR001245) Serine-threonine/tyrosine-protein kinase, catalytic domain	189	CotAD_20164, CotAD_46153, CotAD_69673, CotAD_01529, CotAD_40450, CotAD_57447, CotAD_12535, CotAD_14436, CotAD_35146, CotAD_33520, CotAD_08161, CotAD_28297, CotAD_00160, CotAD_67647, CotAD_21762, CotAD_59591, CotAD_18195, CotAD_25446, CotAD_52669, CotAD_74115, CotAD_05438, CotAD_28859, CotAD_03811, CotAD_22299, CotAD_22332, CotAD_68332, CotAD_47770, CotAD_22296, CotAD_50484, CotAD_17389, CotAD_222…		(IPR001245) Serine-threonine/tyrosine-protein kinase, catalytic domain	189	CotAD_20164, CotAD_46153, CotAD_69673, CotAD_01529, CotAD_40450, CotAD_57447, CotAD_12535, CotAD_14436, CotAD_35146, CotAD_33520, CotAD_08161, CotAD_28297, CotAD_00160, CotAD_67647, CotAD_21762, CotAD_59591, CotAD_18195, CotAD_25446, CotAD_52669, CotAD_74115, CotAD_05438, CotAD_28859, CotAD_03811, CotAD_22299, CotAD_22332, CotAD_68332, CotAD_47770, CotAD_22296, CotAD_50484, CotAD_17389, CotAD_222…		(IPR001245) Serine-threonine/tyrosine-protein kinase, catalytic domain	189	CotAD_20164, CotAD_46153, CotAD_69673, CotAD_01529, CotAD_40450, CotAD_57447, CotAD_12535, CotAD_14436, CotAD_35146, CotAD_33520, CotAD_08161, CotAD_28297, CotAD_00160, CotAD_67647, CotAD_21762, CotAD_59591, CotAD_18195, CotAD_25446, CotAD_52669, CotAD_74115, CotAD_05438, CotAD_28859, CotAD_03811, CotAD_22299, CotAD_22332, CotAD_68332, CotAD_47770, CotAD_22296, CotAD_50484, CotAD_17389, CotAD_222…		(IPR001245) Serine-threonine/tyrosine-protein kinase, catalytic domain	189	CotAD_20164, CotAD_46153, CotAD_69673, CotAD_01529, CotAD_40450, CotAD_57447, CotAD_12535, CotAD_14436, CotAD_35146, CotAD_33520, CotAD_08161, CotAD_28297, CotAD_00160, CotAD_67647, CotAD_21762, CotAD_59591, CotAD_18195, CotAD_25446, CotAD_52669, CotAD_74115, CotAD_05438, CotAD_28859, CotAD_03811, CotAD_22299, CotAD_22332, CotAD_68332, CotAD_47770, CotAD_22296, CotAD_50484, CotAD_17389, CotAD_222…		(IPR001245) Serine-threonine/tyrosine-protein kinase, catalytic domain	189	CotAD_20164, CotAD_46153, CotAD_69673, CotAD_01529, CotAD_40450, CotAD_57447, CotAD_12535, CotAD_14436, CotAD_35146, CotAD_33520, CotAD_08161, CotAD_28297, CotAD_00160, CotAD_67647, CotAD_21762, CotAD_59591, CotAD_18195, CotAD_25446, CotAD_52669, CotAD_74115, CotAD_05438, CotAD_28859, CotAD_03811, CotAD_22299, CotAD_22332, CotAD_68332, CotAD_47770, CotAD_22296, CotAD_50484, CotAD_17389, CotAD_222…		(IPR001245) Serine-threonine/tyrosine-protein kinase, catalytic domain	189	CotAD_20164, CotAD_46153, CotAD_69673, CotAD_01529, CotAD_40450, CotAD_57447, CotAD_12535, CotAD_14436, CotAD_35146, CotAD_33520, CotAD_08161, CotAD_28297, CotAD_00160, CotAD_67647, CotAD_21762, CotAD_59591, CotAD_18195, CotAD_25446, CotAD_52669, CotAD_74115, CotAD_05438, CotAD_28859, CotAD_03811, CotAD_22299, CotAD_22332, CotAD_68332, CotAD_47770, CotAD_22296, CotAD_50484, CotAD_17389, CotAD_222…		(IPR001245) Serine-threonine/tyrosine-protein kinase, catalytic domain	189	CotAD_20164, CotAD_46153, CotAD_69673, CotAD_01529, CotAD_40450, CotAD_57447, CotAD_12535, CotAD_14436, CotAD_35146, CotAD_33520, CotAD_08161, CotAD_28297, CotAD_00160, CotAD_67647, CotAD_21762, CotAD_59591, CotAD_18195, CotAD_25446, CotAD_52669, CotAD_74115, CotAD_05438, CotAD_28859, CotAD_03811, CotAD_22299, CotAD_22332, CotAD_68332, CotAD_47770, CotAD_22296, CotAD_50484, CotAD_17389, CotAD_222…		(IPR001245) Serine-threonine/tyrosine-protein kinase, catalytic domain	189	CotAD_20164, CotAD_46153, CotAD_69673, CotAD_01529, CotAD_40450, CotAD_57447, CotAD_12535, CotAD_14436, CotAD_35146, CotAD_33520, CotAD_08161, CotAD_28297, CotAD_00160, CotAD_67647, CotAD_21762, CotAD_59591, CotAD_18195, CotAD_25446, CotAD_52669, CotAD_74115, CotAD_05438, CotAD_28859, CotAD_03811, CotAD_22299, CotAD_22332, CotAD_68332, CotAD_47770, CotAD_22296, CotAD_50484, CotAD_17389, CotAD_222…		(IPR001245) Serine-threonine/tyrosine-protein kinase, catalytic domain	189	CotAD_20164, CotAD_46153, CotAD_69673, CotAD_01529, CotAD_40450, CotAD_57447, CotAD_12535, CotAD_14436, CotAD_35146, CotAD_33520, CotAD_08161, CotAD_28297, CotAD_00160, CotAD_67647, CotAD_21762, CotAD_59591, CotAD_18195, CotAD_25446, CotAD_52669, CotAD_74115, CotAD_05438, CotAD_28859, CotAD_03811, CotAD_22299, CotAD_22332, CotAD_68332, CotAD_47770, CotAD_22296, CotAD_50484, CotAD_17389, CotAD_222…		(IPR001245) Serine-threonine/tyrosine-protein kinase, catalytic domain	189	CotAD_20164, CotAD_46153, CotAD_69673, CotAD_01529, CotAD_40450, CotAD_57447, CotAD_12535, CotAD_14436, CotAD_35146, CotAD_33520, CotAD_08161, CotAD_28297, CotAD_00160, CotAD_67647, CotAD_21762, CotAD_59591, CotAD_18195, CotAD_25446, CotAD_52669, CotAD_74115, CotAD_05438, CotAD_28859, CotAD_03811, CotAD_22299, CotAD_22332, CotAD_68332, CotAD_47770, CotAD_22296, CotAD_50484, CotAD_17389, CotAD_222…		(IPR001245) Serine-threonine/tyrosine-protein kinase, catalytic domain	189	CotAD_20164, CotAD_46153, CotAD_69673, CotAD_01529, CotAD_40450, CotAD_57447, CotAD_12535, CotAD_14436, CotAD_35146, CotAD_33520, CotAD_08161, CotAD_28297, CotAD_00160, CotAD_67647, CotAD_21762, CotAD_59591, CotAD_18195, CotAD_25446, CotAD_52669, CotAD_74115, CotAD_05438, CotAD_28859, CotAD_03811, CotAD_22299, CotAD_22332, CotAD_68332, CotAD_47770, CotAD_22296, CotAD_50484, CotAD_17389, CotAD_222…		(IPR001245) Serine-threonine/tyrosine-protein kinase, catalytic domain	189	CotAD_20164, CotAD_46153, CotAD_69673, CotAD_01529, CotAD_40450, CotAD_57447, CotAD_12535, CotAD_14436, CotAD_35146, CotAD_33520, CotAD_08161, CotAD_28297, CotAD_00160, CotAD_67647, CotAD_21762, CotAD_59591, CotAD_18195, CotAD_25446, CotAD_52669, CotAD_74115, CotAD_05438, CotAD_28859, CotAD_03811, CotAD_22299, CotAD_22332, CotAD_68332, CotAD_47770, CotAD_22296, CotAD_50484, CotAD_17389, CotAD_222…		(IPR001245) Serine-threonine/tyrosine-protein kinase, catalytic domain	189
(IPR021720) Malectin	27	CotAD_70461, CotAD_66465, CotAD_66464, CotAD_66459, CotAD_52283, CotAD_66457, CotAD_24718, CotAD_21607, CotAD_24719, CotAD_24716, CotAD_24717, CotAD_25705, CotAD_67647, CotAD_25702, CotAD_75181, CotAD_67284, CotAD_72038, CotAD_40381, CotAD_73761, CotAD_47804, CotAD_67655, CotAD_52196, CotAD_72041, CotAD_47800, CotAD_20224, CotAD_24721, CotAD_47801		(IPR021720) Malectin	27	CotAD_70461, CotAD_66465, CotAD_66464, CotAD_66459, CotAD_52283, CotAD_66457, CotAD_24718, CotAD_21607, CotAD_24719, CotAD_24716, CotAD_24717, CotAD_25705, CotAD_67647, CotAD_25702, CotAD_75181, CotAD_67284, CotAD_72038, CotAD_40381, CotAD_73761, CotAD_47804, CotAD_67655, CotAD_52196, CotAD_72041, CotAD_47800, CotAD_20224, CotAD_24721, CotAD_47801		(IPR021720) Malectin	27	CotAD_70461, CotAD_66465, CotAD_66464, CotAD_66459, CotAD_52283, CotAD_66457, CotAD_24718, CotAD_21607, CotAD_24719, CotAD_24716, CotAD_24717, CotAD_25705, CotAD_67647, CotAD_25702, CotAD_75181, CotAD_67284, CotAD_72038, CotAD_40381, CotAD_73761, CotAD_47804, CotAD_67655, CotAD_52196, CotAD_72041, CotAD_47800, CotAD_20224, CotAD_24721, CotAD_47801		(IPR021720) Malectin	27	CotAD_70461, CotAD_66465, CotAD_66464, CotAD_66459, CotAD_52283, CotAD_66457, CotAD_24718, CotAD_21607, CotAD_24719, CotAD_24716, CotAD_24717, CotAD_25705, CotAD_67647, CotAD_25702, CotAD_75181, CotAD_67284, CotAD_72038, CotAD_40381, CotAD_73761, CotAD_47804, CotAD_67655, CotAD_52196, CotAD_72041, CotAD_47800, CotAD_20224, CotAD_24721, CotAD_47801		(IPR021720) Malectin	27	CotAD_70461, CotAD_66465, CotAD_66464, CotAD_66459, CotAD_52283, CotAD_66457, CotAD_24718, CotAD_21607, CotAD_24719, CotAD_24716, CotAD_24717, CotAD_25705, CotAD_67647, CotAD_25702, CotAD_75181, CotAD_67284, CotAD_72038, CotAD_40381, CotAD_73761, CotAD_47804, CotAD_67655, CotAD_52196, CotAD_72041, CotAD_47800, CotAD_20224, CotAD_24721, CotAD_47801		(IPR021720) Malectin	27	CotAD_70461, CotAD_66465, CotAD_66464, CotAD_66459, CotAD_52283, CotAD_66457, CotAD_24718, CotAD_21607, CotAD_24719, CotAD_24716, CotAD_24717, CotAD_25705, CotAD_67647, CotAD_25702, CotAD_75181, CotAD_67284, CotAD_72038, CotAD_40381, CotAD_73761, CotAD_47804, CotAD_67655, CotAD_52196, CotAD_72041, CotAD_47800, CotAD_20224, CotAD_24721, CotAD_47801		(IPR021720) Malectin	27	CotAD_70461, CotAD_66465, CotAD_66464, CotAD_66459, CotAD_52283, CotAD_66457, CotAD_24718, CotAD_21607, CotAD_24719, CotAD_24716, CotAD_24717, CotAD_25705, CotAD_67647, CotAD_25702, CotAD_75181, CotAD_67284, CotAD_72038, CotAD_40381, CotAD_73761, CotAD_47804, CotAD_67655, CotAD_52196, CotAD_72041, CotAD_47800, CotAD_20224, CotAD_24721, CotAD_47801		(IPR021720) Malectin	27	CotAD_70461, CotAD_66465, CotAD_66464, CotAD_66459, CotAD_52283, CotAD_66457, CotAD_24718, CotAD_21607, CotAD_24719, CotAD_24716, CotAD_24717, CotAD_25705, CotAD_67647, CotAD_25702, CotAD_75181, CotAD_67284, CotAD_72038, CotAD_40381, CotAD_73761, CotAD_47804, CotAD_67655, CotAD_52196, CotAD_72041, CotAD_47800, CotAD_20224, CotAD_24721, CotAD_47801		(IPR021720) Malectin	27	CotAD_70461, CotAD_66465, CotAD_66464, CotAD_66459, CotAD_52283, CotAD_66457, CotAD_24718, CotAD_21607, CotAD_24719, CotAD_24716, CotAD_24717, CotAD_25705, CotAD_67647, CotAD_25702, CotAD_75181, CotAD_67284, CotAD_72038, CotAD_40381, CotAD_73761, CotAD_47804, CotAD_67655, CotAD_52196, CotAD_72041, CotAD_47800, CotAD_20224, CotAD_24721, CotAD_47801		(IPR021720) Malectin	27	CotAD_70461, CotAD_66465, CotAD_66464, CotAD_66459, CotAD_52283, CotAD_66457, CotAD_24718, CotAD_21607, CotAD_24719, CotAD_24716, CotAD_24717, CotAD_25705, CotAD_67647, CotAD_25702, CotAD_75181, CotAD_67284, CotAD_72038, CotAD_40381, CotAD_73761, CotAD_47804, CotAD_67655, CotAD_52196, CotAD_72041, CotAD_47800, CotAD_20224, CotAD_24721, CotAD_47801		(IPR021720) Malectin	27	CotAD_70461, CotAD_66465, CotAD_66464, CotAD_66459, CotAD_52283, CotAD_66457, CotAD_24718, CotAD_21607, CotAD_24719, CotAD_24716, CotAD_24717, CotAD_25705, CotAD_67647, CotAD_25702, CotAD_75181, CotAD_67284, CotAD_72038, CotAD_40381, CotAD_73761, CotAD_47804, CotAD_67655, CotAD_52196, CotAD_72041, CotAD_47800, CotAD_20224, CotAD_24721, CotAD_47801		(IPR021720) Malectin	27	CotAD_70461, CotAD_66465, CotAD_66464, CotAD_66459, CotAD_52283, CotAD_66457, CotAD_24718, CotAD_21607, CotAD_24719, CotAD_24716, CotAD_24717, CotAD_25705, CotAD_67647, CotAD_25702, CotAD_75181, CotAD_67284, CotAD_72038, CotAD_40381, CotAD_73761, CotAD_47804, CotAD_67655, CotAD_52196, CotAD_72041, CotAD_47800, CotAD_20224, CotAD_24721, CotAD_47801		(IPR021720) Malectin	27
(IPR024788) Malectin-like carbohydrate-binding domain	13	CotAD_41732, CotAD_31444, CotAD_06671, CotAD_44784, CotAD_51911, CotAD_35146, CotAD_51795, CotAD_2119, CotAD_57195, CotAD_44233, CotAD_55539, CotAD_47429, CotAD_56131		(IPR024788) Malectin-like carbohydrate-binding domain	13	CotAD_41732, CotAD_31444, CotAD_06671, CotAD_44784, CotAD_51911, CotAD_35146, CotAD_51795, CotAD_2119, CotAD_57195, CotAD_44233, CotAD_55539, CotAD_47429, CotAD_56131		(IPR024788) Malectin-like carbohydrate-binding domain	13	CotAD_41732, CotAD_31444, CotAD_06671, CotAD_44784, CotAD_51911, CotAD_35146, CotAD_51795, CotAD_2119, CotAD_57195, CotAD_44233, CotAD_55539, CotAD_47429, CotAD_56131		(IPR024788) Malectin-like carbohydrate-binding domain	13	CotAD_41732, CotAD_31444, CotAD_06671, CotAD_44784, CotAD_51911, CotAD_35146, CotAD_51795, CotAD_2119, CotAD_57195, CotAD_44233, CotAD_55539, CotAD_47429, CotAD_56131		(IPR024788) Malectin-like carbohydrate-binding domain	13	CotAD_41732, CotAD_31444, CotAD_06671, CotAD_44784, CotAD_51911, CotAD_35146, CotAD_51795, CotAD_2119, CotAD_57195, CotAD_44233, CotAD_55539, CotAD_47429, CotAD_56131		(IPR024788) Malectin-like carbohydrate-binding domain	13	CotAD_41732, CotAD_31444, CotAD_06671, CotAD_44784, CotAD_51911, CotAD_35146, CotAD_51795, CotAD_2119, CotAD_57195, CotAD_44233, CotAD_55539, CotAD_47429, CotAD_56131		(IPR024788) Malectin-like carbohydrate-binding domain	13	CotAD_41732, CotAD_31444, CotAD_06671, CotAD_44784, CotAD_51911, CotAD_35146, CotAD_51795, CotAD_2119, CotAD_57195, CotAD_44233, CotAD_55539, CotAD_47429, CotAD_56131		(IPR024788) Malectin-like carbohydrate-binding domain	13	CotAD_41732, CotAD_31444, CotAD_06671, CotAD_44784, CotAD_51911, CotAD_35146, CotAD_51795, CotAD_2119, CotAD_57195, CotAD_44233, CotAD_55539, CotAD_47429, CotAD_56131		(IPR024788) Malectin-like carbohydrate-binding domain	13	CotAD_41732, CotAD_31444, CotAD_06671, CotAD_44784, CotAD_51911, CotAD_35146, CotAD_51795, CotAD_2119, CotAD_57195, CotAD_44233, CotAD_55539, CotAD_47429, CotAD_56131		(IPR024788) Malectin-like carbohydrate-binding domain	13	CotAD_41732, CotAD_31444, CotAD_06671, CotAD_44784, CotAD_51911, CotAD_35146, CotAD_51795, CotAD_2119, CotAD_57195, CotAD_44233, CotAD_55539, CotAD_47429, CotAD_56131		(IPR024788) Malectin-like carbohydrate-binding domain	13	CotAD_41732, CotAD_31444, CotAD_06671, CotAD_44784, CotAD_51911, CotAD_35146, CotAD_51795, CotAD_2119, CotAD_57195, CotAD_44233, CotAD_55539, CotAD_47429, CotAD_56131		(IPR024788) Malectin-like carbohydrate-binding domain	13	CotAD_41732, CotAD_31444, CotAD_06671, CotAD_44784, CotAD_51911, CotAD_35146, CotAD_51795, CotAD_2119, CotAD_57195, CotAD_44233, CotAD_55539, CotAD_47429, CotAD_56131		(IPR024788) Malectin-like carbohydrate-binding domain	13
(IPR000595) Cyclic nucleotide-binding domain	4	CotAD_38001, CotAD_69974, CotAD_60304, CotAD_69381		(IPR000595) Cyclic nucleotide-binding domain	4	CotAD_38001, CotAD_69974, CotAD_60304, CotAD_69381		(IPR000595) Cyclic nucleotide-binding domain	4	CotAD_38001, CotAD_69974, CotAD_60304, CotAD_69381		(IPR000595) Cyclic nucleotide-binding domain	4	CotAD_38001, CotAD_69974, CotAD_60304, CotAD_69381		(IPR000595) Cyclic nucleotide-binding domain	4	CotAD_38001, CotAD_69974, CotAD_60304, CotAD_69381		(IPR000595) Cyclic nucleotide-binding domain	4	CotAD_38001, CotAD_69974, CotAD_60304, CotAD_69381		(IPR000595) Cyclic nucleotide-binding domain	4	CotAD_38001, CotAD_69974, CotAD_60304, CotAD_69381		(IPR000595) Cyclic nucleotide-binding domain	4	CotAD_38001, CotAD_69974, CotAD_60304, CotAD_69381		(IPR000595) Cyclic nucleotide-binding domain	4	CotAD_38001, CotAD_69974, CotAD_60304, CotAD_69381		(IPR000595) Cyclic nucleotide-binding domain	4	CotAD_38001, CotAD_69974, CotAD_60304, CotAD_69381		(IPR000595) Cyclic nucleotide-binding domain	4	CotAD_38001, CotAD_69974, CotAD_60304, CotAD_69381		(IPR000595) Cyclic nucleotide-binding domain	4	CotAD_38001, CotAD_69974, CotAD_60304, CotAD_69381		(IPR000595) Cyclic nucleotide-binding domain	4
(IPR027417) P-loop containing nucleoside triphosphate hydrolase	2	CotAD_13406, CotAD_44505		(IPR027417) P-loop containing nucleoside triphosphate hydrolase	2	CotAD_13406, CotAD_44505		(IPR027417) P-loop containing nucleoside triphosphate hydrolase	2	CotAD_13406, CotAD_44505		(IPR027417) P-loop containing nucleoside triphosphate hydrolase	2	CotAD_13406, CotAD_44505		(IPR027417) P-loop containing nucleoside triphosphate hydrolase	2	CotAD_13406, CotAD_44505		(IPR027417) P-loop containing nucleoside triphosphate hydrolase	2	CotAD_13406, CotAD_44505		(IPR027417) P-loop containing nucleoside triphosphate hydrolase	2	CotAD_13406, CotAD_44505		(IPR027417) P-loop containing nucleoside triphosphate hydrolase	2	CotAD_13406, CotAD_44505		(IPR027417) P-loop containing nucleoside triphosphate hydrolase	2	CotAD_13406, CotAD_44505		(IPR027417) P-loop containing nucleoside triphosphate hydrolase	2	CotAD_13406, CotAD_44505		(IPR027417) P-loop containing nucleoside triphosphate hydrolase	2	CotAD_13406, CotAD_44505		(IPR027417) P-loop containing nucleoside triphosphate hydrolase	2	CotAD_13406, CotAD_44505		(IPR027417) P-loop containing nucleoside triphosphate hydrolase	2
(IPR001752) Kinesin motor domain	2	CotAD_13406, CotAD_44505		(IPR001752) Kinesin motor domain	2	CotAD_13406, CotAD_44505		(IPR001752) Kinesin motor domain	2	CotAD_13406, CotAD_44505		(IPR001752) Kinesin motor domain	2	CotAD_13406, CotAD_44505		(IPR001752) Kinesin motor domain	2	CotAD_13406, CotAD_44505		(IPR001752) Kinesin motor domain	2	CotAD_13406, CotAD_44505		(IPR001752) Kinesin motor domain	2	CotAD_13406, CotAD_44505		(IPR001752) Kinesin motor domain	2	CotAD_13406, CotAD_44505		(IPR001752) Kinesin motor domain	2	CotAD_13406, CotAD_44505		(IPR001752) Kinesin motor domain	2	CotAD_13406, CotAD_44505		(IPR001752) Kinesin motor domain	2	CotAD_13406, CotAD_44505		(IPR001752) Kinesin motor domain	2	CotAD_13406, CotAD_44505		(IPR001752) Kinesin motor domain	2
(IPR017853) Glycoside hydrolase superfamily	1	CotAD_22290		(IPR017853) Glycoside hydrolase superfamily	1	CotAD_22290		(IPR017853) Glycoside hydrolase superfamily	1	CotAD_22290		(IPR017853) Glycoside hydrolase superfamily	1	CotAD_22290		(IPR017853) Glycoside hydrolase superfamily	1	CotAD_22290		(IPR017853) Glycoside hydrolase superfamily	1	CotAD_22290		(IPR017853) Glycoside hydrolase superfamily	1	CotAD_22290		(IPR017853) Glycoside hydrolase superfamily	1	CotAD_22290		(IPR017853) Glycoside hydrolase superfamily	1	CotAD_22290		(IPR017853) Glycoside hydrolase superfamily	1	CotAD_22290		(IPR017853) Glycoside hydrolase superfamily	1	CotAD_22290		(IPR017853) Glycoside hydrolase superfamily	1	CotAD_22290		(IPR017853) Glycoside hydrolase superfamily	1
(IPR014756) Immunoglobulin E-set	1	CotAD_54914		(IPR014756) Immunoglobulin E-set	1	CotAD_54914		(IPR014756) Immunoglobulin E-set	1	CotAD_54914		(IPR014756) Immunoglobulin E-set	1	CotAD_54914		(IPR014756) Immunoglobulin E-set	1	CotAD_54914		(IPR014756) Immunoglobulin E-set	1	CotAD_54914		(IPR014756) Immunoglobulin E-set	1	CotAD_54914		(IPR014756) Immunoglobulin E-set	1	CotAD_54914		(IPR014756) Immunoglobulin E-set	1	CotAD_54914		(IPR014756) Immunoglobulin E-set	1	CotAD_54914		(IPR014756) Immunoglobulin E-set	1	CotAD_54914		(IPR014756) Immunoglobulin E-set	1	CotAD_54914		(IPR014756) Immunoglobulin E-set	1
(IPR024792) Rho GDP-dissociation inhibitor domain	1	CotAD_54914		(IPR024792) Rho GDP-dissociation inhibitor domain	1	CotAD_54914		(IPR024792) Rho GDP-dissociation inhibitor domain	1	CotAD_54914		(IPR024792) Rho GDP-dissociation inhibitor domain	1	CotAD_54914		(IPR024792) Rho GDP-dissociation inhibitor domain	1	CotAD_54914		(IPR024792) Rho GDP-dissociation inhibitor domain	1	CotAD_54914		(IPR024792) Rho GDP-dissociation inhibitor domain	1	CotAD_54914		(IPR024792) Rho GDP-dissociation inhibitor domain	1	CotAD_54914		(IPR024792) Rho GDP-dissociation inhibitor domain	1	CotAD_54914		(IPR024792) Rho GDP-dissociation inhibitor domain	1	CotAD_54914		(IPR024792) Rho GDP-dissociation inhibitor domain	1	CotAD_54914		(IPR024792) Rho GDP-dissociation inhibitor domain	1	CotAD_54914		(IPR024792) Rho GDP-dissociation inhibitor domain	1
(IPR008979) Galactose-binding domain-like	1	CotAD_47800		(IPR008979) Galactose-binding domain-like	1	CotAD_47800		(IPR008979) Galactose-binding domain-like	1	CotAD_47800		(IPR008979) Galactose-binding domain-like	1	CotAD_47800		(IPR008979) Galactose-binding domain-like	1	CotAD_47800		(IPR008979) Galactose-binding domain-like	1	CotAD_47800		(IPR008979) Galactose-binding domain-like	1	CotAD_47800		(IPR008979) Galactose-binding domain-like	1	CotAD_47800		(IPR008979) Galactose-binding domain-like	1	CotAD_47800		(IPR008979) Galactose-binding domain-like	1	CotAD_47800		(IPR008979) Galactose-binding domain-like	1	CotAD_47800		(IPR008979) Galactose-binding domain-like	1	CotAD_47800		(IPR008979) Galactose-binding domain-like	1
(IPR002902) Gnk2-homologous domain	1	CotAD_33139		(IPR002902) Gnk2-homologous domain	1	CotAD_33139		(IPR002902) Gnk2-homologous domain	1	CotAD_33139		(IPR002902) Gnk2-homologous domain	1	CotAD_33139		(IPR002902) Gnk2-homologous domain	1	CotAD_33139		(IPR002902) Gnk2-homologous domain	1	CotAD_33139		(IPR002902) Gnk2-homologous domain	1	CotAD_33139		(IPR002902) Gnk2-homologous domain	1	CotAD_33139		(IPR002902) Gnk2-homologous domain	1	CotAD_33139		(IPR002902) Gnk2-homologous domain	1	CotAD_33139		(IPR002902) Gnk2-homologous domain	1	CotAD_33139		(IPR002902) Gnk2-homologous domain	1	CotAD_33139		(IPR002902) Gnk2-homologous domain	1
(IPR000626) Ubiquitin domain	1	CotAD_40381		(IPR000626) Ubiquitin domain	1	CotAD_40381		(IPR000626) Ubiquitin domain	1	CotAD_40381		(IPR000626) Ubiquitin domain	1	CotAD_40381		(IPR000626) Ubiquitin domain	1	CotAD_40381		(IPR000626) Ubiquitin domain	1	CotAD_40381		(IPR000626) Ubiquitin domain	1	CotAD_40381		(IPR000626) Ubiquitin domain	1	CotAD_40381		(IPR000626) Ubiquitin domain	1	CotAD_40381		(IPR000626) Ubiquitin domain	1	CotAD_40381		(IPR000626) Ubiquitin domain	1	CotAD_40381		(IPR000626) Ubiquitin domain	1	CotAD_40381		(IPR000626) Ubiquitin domain	1
(IPR029071) Ubiquitin-related domain	1	CotAD_40381		(IPR029071) Ubiquitin-related domain	1	CotAD_40381		(IPR029071) Ubiquitin-related domain	1	CotAD_40381		(IPR029071) Ubiquitin-related domain	1	CotAD_40381		(IPR029071) Ubiquitin-related domain	1	CotAD_40381		(IPR029071) Ubiquitin-related domain	1	CotAD_40381		(IPR029071) Ubiquitin-related domain	1	CotAD_40381		(IPR029071) Ubiquitin-related domain	1	CotAD_40381		(IPR029071) Ubiquitin-related domain	1	CotAD_40381		(IPR029071) Ubiquitin-related domain	1	CotAD_40381		(IPR029071) Ubiquitin-related domain	1	CotAD_40381		(IPR029071) Ubiquitin-related domain	1	CotAD_40381		(IPR029071) Ubiquitin-related domain	1
(IPR023329) Chlorophyll a/b binding protein domain	1	CotAD_18790		(IPR023329) Chlorophyll a/b binding protein domain	1	CotAD_18790		(IPR023329) Chlorophyll a/b binding protein domain	1	CotAD_18790		(IPR023329) Chlorophyll a/b binding protein domain	1	CotAD_18790		(IPR023329) Chlorophyll a/b binding protein domain	1	CotAD_18790		(IPR023329) Chlorophyll a/b binding protein domain	1	CotAD_18790		(IPR023329) Chlorophyll a/b binding protein domain	1	CotAD_18790		(IPR023329) Chlorophyll a/b binding protein domain	1	CotAD_18790		(IPR023329) Chlorophyll a/b binding protein domain	1	CotAD_18790		(IPR023329) Chlorophyll a/b binding protein domain	1	CotAD_18790		(IPR023329) Chlorophyll a/b binding protein domain	1	CotAD_18790		(IPR023329) Chlorophyll a/b binding protein domain	1	CotAD_18790		(IPR023329) Chlorophyll a/b binding protein domain	1
Functional Annotation
Seqname	Description	length	#hits	e-value	sim mean	#GO	GO ID	GO names	enzyme codes	enzyme name
CotAD_00148	Leucine-rich repeat receptor kinase family	780	20	0	53.7	10	P:GO:0010075; P:GO:0048364; C:GO:0009506; F:GO:0005515; P:GO:0010183; F:GO:0042277; F:GO:0016301; C:GO:0005886; P:GO:0009987; C:GO:0090406	P:regulation of meristem growth; P:root development; C:plasmodesma; F:protein binding; P:pollen tube guidance; F:peptide binding; F:kinase activity; C:plasma membrane; P:cellular process; C:pollen tube
CotAD_00150	Leucine-rich repeat receptor kinase family	1208	20	0	55.75	10	P:GO:0048364; C:GO:0009506; F:GO:0005515; P:GO:0010183; F:GO:0004672; P:GO:0048507; P:GO:0050789; C:GO:0005886; P:GO:0009987; C:GO:0090406	P:root development; C:plasmodesma; F:protein binding; P:pollen tube guidance; F:protein kinase activity; P:meristem development; P:regulation of biological process; C:plasma membrane; P:cellular process; C:pollen tube
CotAD_00160	receptor kinase	852	20	0	57.05	16	F:GO:0042802; F:GO:0038023; P:GO:0007169; P:GO:0009555; P:GO:0048657; F:GO:0046983; P:GO:0009741; F:GO:0004674; P:GO:0006468; C:GO:0005773; C:GO:0005886; F:GO:0005524; C:GO:0005768; P:GO:0032989; C:GO:0016021; P:GO:0048580	F:identical protein binding; F:signaling receptor activity; P:transmembrane receptor protein tyrosine kinase signaling pathway; P:pollen development; P:anther wall tapetum cell differentiation; F:protein dimerization activity; P:response to brassinosteroid; F:protein serine/threonine kinase activity; P:protein phosphorylation; C:vacuole; C:plasma membrane; F:ATP binding; C:endosome; P:cellular co…	EC:2.7.11	Transferring phosphorus-containing groups
CotAD_00188	Leucine-rich receptor kinase family	945	20	0	57.35	15	P:GO:0048509; P:GO:0010183; P:GO:0007169; P:GO:0046777; F:GO:0004674; C:GO:0005886; P:GO:0051301; F:GO:0005524; F:GO:0005515; P:GO:0001944; P:GO:2000604; P:GO:0010067; P:GO:0010089; C:GO:0090406; P:GO:0010223	P:regulation of meristem development; P:pollen tube guidance; P:transmembrane receptor protein tyrosine kinase signaling pathway; P:protein autophosphorylation; F:protein serine/threonine kinase activity; C:plasma membrane; P:cell division; F:ATP binding; F:protein binding; P:vasculature development; P:negative regulation of secondary growth; P:procambium histogenesis; P:xylem development; C:poll…	EC:2.7.11	Transferring phosphorus-containing groups
CotAD_00229	Leucine-rich receptor kinase family	972	20	0	52.8	12	F:GO:0005524; F:GO:0005515; P:GO:0048509; P:GO:0048608; P:GO:0009791; P:GO:0007169; C:GO:0005783; F:GO:0004674; P:GO:0006468; P:GO:0048507; C:GO:0005886; P:GO:0044702	F:ATP binding; F:protein binding; P:regulation of meristem development; P:reproductive structure development; P:post-embryonic development; P:transmembrane receptor protein tyrosine kinase signaling pathway; C:endoplasmic reticulum; F:protein serine/threonine kinase activity; P:protein phosphorylation; P:meristem development; C:plasma membrane; P:single organism reproductive process	EC:2.7.11	Transferring phosphorus-containing groups
CotAD_00237	Leucine-rich receptor kinase family	1012	20	0	59.7	21	P:GO:0007172; P:GO:0010183; P:GO:0046777; C:GO:0000325; F:GO:0004674; P:GO:0009934; F:GO:0043621; C:GO:0005886; P:GO:0051301; P:GO:0045490; C:GO:0009506; P:GO:0001944; P:GO:0010468; P:GO:0030154; P:GO:0010227; P:GO:0010067; P:GO:0010089; F:GO:0033612; C:GO:0090406; P:GO:0010102; P:GO:0010223	P:signal complex assembly; P:pollen tube guidance; P:protein autophosphorylation; C:plant-type vacuole; F:protein serine/threonine kinase activity; P:regulation of meristem structural organization; F:protein self-association; C:plasma membrane; P:cell division; P:pectin catabolic process; C:plasmodesma; P:vasculature development; P:regulation of gene expression; P:cell differentiation; P:floral o…	EC:2.7.11	Transferring phosphorus-containing groups
CotAD_00353	Leucine-rich repeat kinase family	629	20	0	57.85	13	C:GO:0090404; F:GO:0042802; P:GO:0009860; P:GO:0010183; C:GO:0044444; F:GO:0004674; P:GO:0009846; C:GO:0009506; C:GO:0005618; P:GO:0016310; C:GO:0016324; C:GO:0031224; P:GO:0080092	C:pollen tube tip; F:identical protein binding; P:pollen tube growth; P:pollen tube guidance; C:cytoplasmic part; F:protein serine/threonine kinase activity; P:pollen germination; C:plasmodesma; C:cell wall; P:phosphorylation; C:apical plasma membrane; C:intrinsic component of membrane; P:regulation of pollen tube growth	EC:2.7.11	Transferring phosphorus-containing groups
CotAD_00444	leucine-rich repeat receptor	1005	20	0	56.3	13	P:GO:0010075; P:GO:1902025; P:GO:0046777; F:GO:0004672; F:GO:0042277; P:GO:0044763; C:GO:0005886; P:GO:0045490; F:GO:0005515; P:GO:0010468; P:GO:0010227; P:GO:0090548; P:GO:0010102	P:regulation of meristem growth; P:nitrate import; P:protein autophosphorylation; F:protein kinase activity; F:peptide binding; P:single-organism cellular process; C:plasma membrane; P:pectin catabolic process; F:protein binding; P:regulation of gene expression; P:floral organ abscission; P:response to nitrate starvation; P:lateral root morphogenesis
CotAD_00571	Leucine-rich repeat kinase family	618	20	0	71.4	19	P:GO:0010152; F:GO:0042802; P:GO:0009793; P:GO:0007030; P:GO:0010150; P:GO:0009556; P:GO:0007169; P:GO:0009742; P:GO:0046777; C:GO:0043234; C:GO:0005576; C:GO:0005886; F:GO:0004675; F:GO:0005524; F:GO:0004713; C:GO:0016021; P:GO:0051607; P:GO:0010227; F:GO:0033612	P:pollen maturation; F:identical protein binding; P:embryo development ending in seed dormancy; P:Golgi organization; P:leaf senescence; P:microsporogenesis; P:transmembrane receptor protein tyrosine kinase signaling pathway; P:brassinosteroid mediated signaling pathway; P:protein autophosphorylation; C:protein complex; C:extracellular region; C:plasma membrane; F:transmembrane receptor protein s…	EC:2.7.10; EC:2.7.11	Transferring phosphorus-containing groups; Transferring phosphorus-containing groups
CotAD_00656	Leucine-rich receptor kinase family	1000	20	0	62.1	19	P:GO:1902025; P:GO:0010051; P:GO:0010183; P:GO:0007169; P:GO:0046777; F:GO:0004674; P:GO:0009845; C:GO:0005886; F:GO:0005524; P:GO:0006979; P:GO:0045490; F:GO:0005515; P:GO:0001944; P:GO:0010468; F:GO:0017046; P:GO:0010227; P:GO:0090548; C:GO:0090406; P:GO:0010102	P:nitrate import; P:xylem and phloem pattern formation; P:pollen tube guidance; P:transmembrane receptor protein tyrosine kinase signaling pathway; P:protein autophosphorylation; F:protein serine/threonine kinase activity; P:seed germination; C:plasma membrane; F:ATP binding; P:response to oxidative stress; P:pectin catabolic process; F:protein binding; P:vasculature development; P:regulation of …	EC:2.7.11	Transferring phosphorus-containing groups
CotAD_00712	leucine-rich repeat receptor	756	20	0	61.5	17	P:GO:0010063; P:GO:0010071; P:GO:0000902; P:GO:0007166; F:GO:0004674; P:GO:0007623; F:GO:0004871; C:GO:0005886; P:GO:0042127; C:GO:0005634; C:GO:0009506; P:GO:0048366; C:GO:0005829; P:GO:0010305; P:GO:0016310; P:GO:0048481; P:GO:0010059	P:positive regulation of trichoblast fate specification; P:root meristem specification; P:cell morphogenesis; P:cell surface receptor signaling pathway; F:protein serine/threonine kinase activity; P:circadian rhythm; F:signal transducer activity; C:plasma membrane; P:regulation of cell proliferation; C:nucleus; C:plasmodesma; P:leaf development; C:cytosol; P:leaf vascular tissue pattern formation…	EC:2.7.11	Transferring phosphorus-containing groups
CotAD_00860	leucine-rich repeat receptor	726	20	0	64.75	11	C:GO:0005634; F:GO:0005524; C:GO:0009506; C:GO:0016021; C:GO:0005829; P:GO:0007166; C:GO:0005576; P:GO:0006468; P:GO:0007623; C:GO:0005886; F:GO:0004675	C:nucleus; F:ATP binding; C:plasmodesma; C:integral component of membrane; C:cytosol; P:cell surface receptor signaling pathway; C:extracellular region; P:protein phosphorylation; P:circadian rhythm; C:plasma membrane; F:transmembrane receptor protein serine/threonine kinase activity	EC:2.7.11	Transferring phosphorus-containing groups
CotAD_00894	leucine-rich repeat receptor	1117	20	0	59.15	15	P:GO:0007275; P:GO:0009611; F:GO:0004383; P:GO:0007169; P:GO:0009753; F:GO:0042277; F:GO:0004674; P:GO:0006468; P:GO:0042742; C:GO:0005886; F:GO:0001653; F:GO:0005524; C:GO:0009506; F:GO:0005515; P:GO:0045087	P:multicellular organism development; P:response to wounding; F:guanylate cyclase activity; P:transmembrane receptor protein tyrosine kinase signaling pathway; P:response to jasmonic acid; F:peptide binding; F:protein serine/threonine kinase activity; P:protein phosphorylation; P:defense response to bacterium; C:plasma membrane; F:peptide receptor activity; F:ATP binding; C:plasmodesma; F:protein…	EC:2.7.11; EC:4.6.1.2	Transferring phosphorus-containing groups; Guanylate cyclase
CotAD_00934	Leucine-rich receptor kinase family	1067	20	0	56.95	9	P:GO:1901529; P:GO:1901528; F:GO:0005515; C:GO:0005829; F:GO:0004672; P:GO:0006468; P:GO:0032502; C:GO:0005886; P:GO:1901527	P:positive regulation of anion channel activity; P:hydrogen peroxide mediated signaling pathway involved in stomatal movement; F:protein binding; C:cytosol; F:protein kinase activity; P:protein phosphorylation; P:developmental process; C:plasma membrane; P:abscisic acid-activated signaling pathway involved in stomatal movement
CotAD_00967	Leucine-rich repeat kinase family	613	20	0	60.1	10	F:GO:0005515; P:GO:0009860; C:GO:0005737; P:GO:0016310; F:GO:0004674; P:GO:0009846; C:GO:0016324; P:GO:0050896; C:GO:0090406; P:GO:0080092	F:protein binding; P:pollen tube growth; C:cytoplasm; P:phosphorylation; F:protein serine/threonine kinase activity; P:pollen germination; C:apical plasma membrane; P:response to stimulus; C:pollen tube; P:regulation of pollen tube growth	EC:2.7.11	Transferring phosphorus-containing groups
CotAD_00975	receptor kinase	1085	20	0	62.1	19	P:GO:0007275; P:GO:0009611; F:GO:0004383; P:GO:0007169; P:GO:0009620; P:GO:0045851; F:GO:0004674; P:GO:0006468; C:GO:0005886; P:GO:0044702; F:GO:0001653; F:GO:0005524; P:GO:0003006; C:GO:0009507; P:GO:0009826; F:GO:0004888; F:GO:0005515; P:GO:0045087; P:GO:0031347	P:multicellular organism development; P:response to wounding; F:guanylate cyclase activity; P:transmembrane receptor protein tyrosine kinase signaling pathway; P:response to fungus; P:pH reduction; F:protein serine/threonine kinase activity; P:protein phosphorylation; C:plasma membrane; P:single organism reproductive process; F:peptide receptor activity; F:ATP binding; P:developmental process inv…	EC:2.7.11; EC:4.6.1.2	Transferring phosphorus-containing groups; Guanylate cyclase
CotAD_00978	Leucine-rich receptor kinase family	1451	20	0	52.5	9	P:GO:0009617; C:GO:0005768; P:GO:0051179; P:GO:0007165; C:GO:0016020; P:GO:0033554; F:GO:0004672; F:GO:0005488; P:GO:0006952	P:response to bacterium; C:endosome; P:localization; P:signal transduction; C:membrane; P:cellular response to stress; F:protein kinase activity; F:binding; P:defense response
CotAD_00979	Leucine-rich receptor kinase family	728	20	0	55.15	12	P:GO:0009617; C:GO:0005768; P:GO:0051179; P:GO:0007165; C:GO:0016020; P:GO:0033554; P:GO:0016310; F:GO:0004674; F:GO:0005488; P:GO:0006952; P:GO:0002376; P:GO:0050776	P:response to bacterium; C:endosome; P:localization; P:signal transduction; C:membrane; P:cellular response to stress; P:phosphorylation; F:protein serine/threonine kinase activity; F:binding; P:defense response; P:immune system process; P:regulation of immune response	EC:2.7.11	Transferring phosphorus-containing groups
CotAD_01050	Leucine-rich repeat kinase family	594	20	0	71.7	29	P:GO:0009793; P:GO:0007030; P:GO:0009556; P:GO:0060548; P:GO:0006468; F:GO:0005524; P:GO:0009826; C:GO:0005768; P:GO:0008219; F:GO:0046982; P:GO:0030244; P:GO:0050832; F:GO:0033612; P:GO:0010152; F:GO:0042802; P:GO:1900140; P:GO:0010150; P:GO:0007169; P:GO:0009742; P:GO:0009664; C:GO:0043234; P:GO:0042742; C:GO:0005886; F:GO:0004675; P:GO:0002229; P:GO:0048354; C:GO:0016021; P:GO:0010227; P:GO:00…	P:embryo development ending in seed dormancy; P:Golgi organization; P:microsporogenesis; P:negative regulation of cell death; P:protein phosphorylation; F:ATP binding; P:unidimensional cell growth; C:endosome; P:cell death; F:protein heterodimerization activity; P:cellulose biosynthetic process; P:defense response to fungus; F:receptor serine/threonine kinase binding; P:pollen maturation; F:ident…	EC:2.7.11	Transferring phosphorus-containing groups
CotAD_01210	Leucine-rich repeat kinase family	641	20	0	55.75	6	F:GO:0005524; F:GO:0038023; P:GO:0007169; F:GO:0004674; P:GO:0006468; C:GO:0005886	F:ATP binding; F:signaling receptor activity; P:transmembrane receptor protein tyrosine kinase signaling pathway; F:protein serine/threonine kinase activity; P:protein phosphorylation; C:plasma membrane	EC:2.7.11	Transferring phosphorus-containing groups
CotAD_01529	leucine-rich repeat receptor	709	20	0	61.75	8	C:GO:0005634; F:GO:0005524; C:GO:0005829; P:GO:0007169; C:GO:0005576; P:GO:0006468; C:GO:0005886; F:GO:0004675	C:nucleus; F:ATP binding; C:cytosol; P:transmembrane receptor protein tyrosine kinase signaling pathway; C:extracellular region; P:protein phosphorylation; C:plasma membrane; F:transmembrane receptor protein serine/threonine kinase activity	EC:2.7.11	Transferring phosphorus-containing groups
CotAD_01535	Leucine-rich repeat kinase family	666	20	0	62.65	13	C:GO:0090404; F:GO:0042802; P:GO:0009860; P:GO:0010183; P:GO:0007169; F:GO:0004674; P:GO:0006468; P:GO:0009846; F:GO:0005524; C:GO:0009506; C:GO:0005737; C:GO:0016324; P:GO:0080092	C:pollen tube tip; F:identical protein binding; P:pollen tube growth; P:pollen tube guidance; P:transmembrane receptor protein tyrosine kinase signaling pathway; F:protein serine/threonine kinase activity; P:protein phosphorylation; P:pollen germination; F:ATP binding; C:plasmodesma; C:cytoplasm; C:apical plasma membrane; P:regulation of pollen tube growth	EC:2.7.11	Transferring phosphorus-containing groups
CotAD_01620	Leucine-rich repeat kinase family	663	20	2.39e-153	63.55	10	C:GO:0005634; F:GO:0005515; P:GO:0010183; C:GO:0012505; F:GO:0004672; P:GO:0007166; P:GO:0016310; P:GO:0048765; C:GO:0005886; C:GO:0090406	C:nucleus; F:protein binding; P:pollen tube guidance; C:endomembrane system; F:protein kinase activity; P:cell surface receptor signaling pathway; P:phosphorylation; P:root hair cell differentiation; C:plasma membrane; C:pollen tube
CotAD_01701	Leucine-rich repeat kinase family	1028	20	0	59.15	10	P:GO:1901529; F:GO:0005524; P:GO:1901528; F:GO:0005515; C:GO:0005829; P:GO:0007169; F:GO:0004674; P:GO:0006468; C:GO:0005886; P:GO:1901527	P:positive regulation of anion channel activity; F:ATP binding; P:hydrogen peroxide mediated signaling pathway involved in stomatal movement; F:protein binding; C:cytosol; P:transmembrane receptor protein tyrosine kinase signaling pathway; F:protein serine/threonine kinase activity; P:protein phosphorylation; C:plasma membrane; P:abscisic acid-activated signaling pathway involved in stomatal move…	EC:2.7.11	Transferring phosphorus-containing groups
CotAD_01838	disease resistance	948	20	1.82e-174	48	3	C:GO:0005618; C:GO:0016020; P:GO:0050832	C:cell wall; C:membrane; P:defense response to fungus
CotAD_01890	Leucine-rich repeat kinase family	639	20	0	52.5	13	P:GO:0009793; P:GO:0007169; P:GO:0044763; F:GO:0004674; P:GO:0006468; P:GO:0060862; C:GO:0005886; P:GO:0006950; P:GO:0009888; F:GO:0005524; F:GO:0004713; P:GO:0031349; P:GO:0010942	P:embryo development ending in seed dormancy; P:transmembrane receptor protein tyrosine kinase signaling pathway; P:single-organism cellular process; F:protein serine/threonine kinase activity; P:protein phosphorylation; P:negative regulation of floral organ abscission; C:plasma membrane; P:response to stress; P:tissue development; F:ATP binding; F:protein tyrosine kinase activity; P:positive reg…	EC:2.7.10; EC:2.7.11	Transferring phosphorus-containing groups; Transferring phosphorus-containing groups
CotAD_02161	Leucine-rich repeat kinase family	644	20	0	62.25	13	P:GO:0007169; P:GO:0009610; C:GO:0005576; C:GO:0005774; C:GO:0009505; F:GO:0004674; P:GO:0006468; P:GO:0009834; C:GO:0046658; F:GO:0005524; C:GO:0009506; P:GO:0009737; P:GO:2000605	P:transmembrane receptor protein tyrosine kinase signaling pathway; P:response to symbiotic fungus; C:extracellular region; C:vacuolar membrane; C:plant-type cell wall; F:protein serine/threonine kinase activity; P:protein phosphorylation; P:plant-type secondary cell wall biogenesis; C:anchored component of plasma membrane; F:ATP binding; C:plasmodesma; P:response to abscisic acid; P:positive reg…	EC:2.7.11	Transferring phosphorus-containing groups
CotAD_02312	receptor kinase	999	20	0	56.05	15	P:GO:0007169; P:GO:0000226; F:GO:0004674; P:GO:0006468; P:GO:0006952; C:GO:0009504; C:GO:0005886; P:GO:0044702; F:GO:0005524; P:GO:0003006; P:GO:0009617; C:GO:0005768; P:GO:0051179; C:GO:0016021; P:GO:0010103	P:transmembrane receptor protein tyrosine kinase signaling pathway; P:microtubule cytoskeleton organization; F:protein serine/threonine kinase activity; P:protein phosphorylation; P:defense response; C:cell plate; C:plasma membrane; P:single organism reproductive process; F:ATP binding; P:developmental process involved in reproduction; P:response to bacterium; C:endosome; P:localization; C:integr…	EC:2.7.11	Transferring phosphorus-containing groups
CotAD_02741	receptor kinase	950	20	0	71.9	9	F:GO:0005524; C:GO:0016021; P:GO:0009553; C:GO:0005576; F:GO:0004674; P:GO:0006468; P:GO:0048481; C:GO:0005886; P:GO:0010103	F:ATP binding; C:integral component of membrane; P:embryo sac development; C:extracellular region; F:protein serine/threonine kinase activity; P:protein phosphorylation; P:plant ovule development; C:plasma membrane; P:stomatal complex morphogenesis	EC:2.7.11	Transferring phosphorus-containing groups
CotAD_03099	Leucine-rich receptor kinase family	992	20	0	61.65	23	P:GO:0010075; P:GO:0007172; P:GO:0010183; P:GO:0007169; P:GO:0046777; P:GO:0048437; C:GO:0000325; F:GO:0004674; P:GO:0009934; F:GO:0043621; C:GO:0005886; P:GO:0048364; P:GO:0051301; F:GO:0005524; C:GO:0009506; P:GO:0001944; C:GO:0016021; P:GO:0030154; P:GO:0010067; P:GO:0010089; F:GO:0033612; C:GO:0090406; P:GO:0010223	P:regulation of meristem growth; P:signal complex assembly; P:pollen tube guidance; P:transmembrane receptor protein tyrosine kinase signaling pathway; P:protein autophosphorylation; P:floral organ development; C:plant-type vacuole; F:protein serine/threonine kinase activity; P:regulation of meristem structural organization; F:protein self-association; C:plasma membrane; P:root development; P:cel…	EC:2.7.11	Transferring phosphorus-containing groups
CotAD_03134	Leucine-rich receptor kinase family	995	20	0	64.95	23	P:GO:0007172; P:GO:0010082; P:GO:0010183; P:GO:0007169; P:GO:0046777; P:GO:0048437; C:GO:0000325; P:GO:0009934; F:GO:0043621; C:GO:0005886; P:GO:0051301; F:GO:0005524; F:GO:0004702; C:GO:0009506; P:GO:0010449; P:GO:0001944; C:GO:0016021; P:GO:0030154; P:GO:0010067; P:GO:0010089; F:GO:0033612; C:GO:0090406; P:GO:0010223	P:signal complex assembly; P:regulation of root meristem growth; P:pollen tube guidance; P:transmembrane receptor protein tyrosine kinase signaling pathway; P:protein autophosphorylation; P:floral organ development; C:plant-type vacuole; P:regulation of meristem structural organization; F:protein self-association; C:plasma membrane; P:cell division; F:ATP binding; F:signal transducer, downstream …	EC:2.7.11	Transferring phosphorus-containing groups
CotAD_03206	Leucine-rich repeat kinase family	621	20	3e-101	51.4	7	C:GO:0005618; C:GO:0044444; P:GO:0050789; C:GO:0005886; C:GO:0031224; P:GO:0009987; P:GO:0050896	C:cell wall; C:cytoplasmic part; P:regulation of biological process; C:plasma membrane; C:intrinsic component of membrane; P:cellular process; P:response to stimulus
CotAD_03524	Leucine-rich repeat kinase family	886	20	0	57.25	11	P:GO:0002764; C:GO:0009507; C:GO:0005768; F:GO:0005515; P:GO:0051179; F:GO:0019199; P:GO:0010204; P:GO:0016045; P:GO:0010359; P:GO:0009626; C:GO:0005886	P:immune response-regulating signaling pathway; C:chloroplast; C:endosome; F:protein binding; P:localization; F:transmembrane receptor protein kinase activity; P:defense response signaling pathway, resistance gene-independent; P:detection of bacterium; P:regulation of anion channel activity; P:plant-type hypersensitive response; C:plasma membrane	EC:2.7.11	Transferring phosphorus-containing groups
CotAD_03665	Leucine-rich repeat kinase family	654	20	0	61.2	5	F:GO:0005524; P:GO:0007169; F:GO:0004674; P:GO:0006468; C:GO:0005886	F:ATP binding; P:transmembrane receptor protein tyrosine kinase signaling pathway; F:protein serine/threonine kinase activity; P:protein phosphorylation; C:plasma membrane	EC:2.7.11	Transferring phosphorus-containing groups
CotAD_03811	Leucine-rich repeat kinase family	1228	20	2.12e-171	50.6	8	P:GO:0007165; P:GO:0007275; C:GO:0016020; C:GO:0044464; F:GO:0005488; F:GO:0016301; P:GO:0002376; P:GO:0050776	P:signal transduction; P:multicellular organism development; C:membrane; C:cell part; F:binding; F:kinase activity; P:immune system process; P:regulation of immune response
CotAD_03886	leucine-rich repeat receptor	1099	20	0	50.75	17	P:GO:0090698; P:GO:0048229; P:GO:0048438; P:GO:0007169; P:GO:0048437; P:GO:0048646; F:GO:0004674; P:GO:0006468; P:GO:0009725; P:GO:0048827; C:GO:0031090; C:GO:0044446; C:GO:0005886; P:GO:0048869; F:GO:0005524; F:GO:0005515; C:GO:0005739	P:post-embryonic plant morphogenesis; P:gametophyte development; P:floral whorl development; P:transmembrane receptor protein tyrosine kinase signaling pathway; P:floral organ development; P:anatomical structure formation involved in morphogenesis; F:protein serine/threonine kinase activity; P:protein phosphorylation; P:response to hormone; P:phyllome development; C:organelle membrane; C:intracel…	EC:2.7.11	Transferring phosphorus-containing groups
CotAD_03924	Leucine-rich repeat kinase family	608	20	0	64.35	13	P:GO:0090698; P:GO:0048229; P:GO:0048438; P:GO:0048437; P:GO:0009664; F:GO:0004674; P:GO:0006468; P:GO:0048827; C:GO:0005886; F:GO:0005524; P:GO:0009826; P:GO:0048354; C:GO:0016021	P:post-embryonic plant morphogenesis; P:gametophyte development; P:floral whorl development; P:floral organ development; P:plant-type cell wall organization; F:protein serine/threonine kinase activity; P:protein phosphorylation; P:phyllome development; C:plasma membrane; F:ATP binding; P:unidimensional cell growth; P:mucilage biosynthetic process involved in seed coat development; C:integral comp…	EC:2.7.11	Transferring phosphorus-containing groups
CotAD_04243	Leucine-rich repeat kinase family	637	20	0	63.65	12	F:GO:0005524; C:GO:0009506; P:GO:0009737; C:GO:0005739; P:GO:2000605; P:GO:0007169; P:GO:0009610; C:GO:0005774; C:GO:0009505; F:GO:0004674; P:GO:0006468; C:GO:0046658	F:ATP binding; C:plasmodesma; P:response to abscisic acid; C:mitochondrion; P:positive regulation of secondary growth; P:transmembrane receptor protein tyrosine kinase signaling pathway; P:response to symbiotic fungus; C:vacuolar membrane; C:plant-type cell wall; F:protein serine/threonine kinase activity; P:protein phosphorylation; C:anchored component of plasma membrane	EC:2.7.11	Transferring phosphorus-containing groups
CotAD_04269	leucine-rich repeat receptor	835	20	0	67.7	16	P:GO:0010063; P:GO:0010071; P:GO:0000902; P:GO:0007169; C:GO:0005576; P:GO:0006468; P:GO:0007623; C:GO:0005886; P:GO:0042127; F:GO:0004675; F:GO:0005524; C:GO:0009506; P:GO:0048366; P:GO:0010305; P:GO:0048481; P:GO:0010059	P:positive regulation of trichoblast fate specification; P:root meristem specification; P:cell morphogenesis; P:transmembrane receptor protein tyrosine kinase signaling pathway; C:extracellular region; P:protein phosphorylation; P:circadian rhythm; C:plasma membrane; P:regulation of cell proliferation; F:transmembrane receptor protein serine/threonine kinase activity; F:ATP binding; C:plasmodesma…	EC:2.7.11	Transferring phosphorus-containing groups
CotAD_04319	Leucine-rich repeat kinase family	597	20	0	60.6	6	F:GO:0005524; C:GO:0016020; P:GO:0007169; F:GO:0004674; P:GO:0006468; C:GO:0071944	F:ATP binding; C:membrane; P:transmembrane receptor protein tyrosine kinase signaling pathway; F:protein serine/threonine kinase activity; P:protein phosphorylation; C:cell periphery	EC:2.7.11	Transferring phosphorus-containing groups
CotAD_04320	Leucine-rich repeat kinase family	786	20	0	60.75	7	C:GO:0009507; P:GO:0010070; C:GO:0016020; F:GO:0004672; F:GO:0005488; P:GO:0006468; C:GO:0071944	C:chloroplast; P:zygote asymmetric cell division; C:membrane; F:protein kinase activity; F:binding; P:protein phosphorylation; C:cell periphery
CotAD_04883	Leucine-rich receptor kinase family	1028	20	0	59.65	23	P:GO:0010075; P:GO:0007172; P:GO:0010183; P:GO:0007169; P:GO:0046777; P:GO:0048437; C:GO:0000325; F:GO:0004674; P:GO:0009934; F:GO:0043621; C:GO:0005886; P:GO:0048364; P:GO:0051301; F:GO:0005524; C:GO:0009506; P:GO:0001944; C:GO:0016021; P:GO:0030154; P:GO:0010067; P:GO:0010089; F:GO:0033612; C:GO:0090406; P:GO:0010223	P:regulation of meristem growth; P:signal complex assembly; P:pollen tube guidance; P:transmembrane receptor protein tyrosine kinase signaling pathway; P:protein autophosphorylation; P:floral organ development; C:plant-type vacuole; F:protein serine/threonine kinase activity; P:regulation of meristem structural organization; F:protein self-association; C:plasma membrane; P:root development; P:cel…	EC:2.7.11	Transferring phosphorus-containing groups
CotAD_05231	receptor kinase	1015	20	0	52.3	8	P:GO:0009617; C:GO:0005768; P:GO:0051179; C:GO:0016020; P:GO:0051716; F:GO:0005488; P:GO:0006952; P:GO:0050789	P:response to bacterium; C:endosome; P:localization; C:membrane; P:cellular response to stimulus; F:binding; P:defense response; P:regulation of biological process
CotAD_05278	Leucine-rich repeat kinase family	691	20	0	56.8	10	C:GO:0009570; F:GO:0005524; F:GO:0005515; P:GO:0007169; P:GO:0046777; C:GO:0009505; F:GO:0004674; C:GO:0005886; C:GO:0090406; P:GO:0010069	C:chloroplast stroma; F:ATP binding; F:protein binding; P:transmembrane receptor protein tyrosine kinase signaling pathway; P:protein autophosphorylation; C:plant-type cell wall; F:protein serine/threonine kinase activity; C:plasma membrane; C:pollen tube; P:zygote asymmetric cytokinesis in embryo sac	EC:2.7.11	Transferring phosphorus-containing groups
CotAD_05288	Leucine-rich repeat kinase family	611	20	0	67.2	13	P:GO:0007169; P:GO:0009610; C:GO:0005576; C:GO:0005774; C:GO:0009505; F:GO:0004674; P:GO:0006468; C:GO:0046658; F:GO:0005524; C:GO:0009506; P:GO:0009737; P:GO:2000605; C:GO:0005829	P:transmembrane receptor protein tyrosine kinase signaling pathway; P:response to symbiotic fungus; C:extracellular region; C:vacuolar membrane; C:plant-type cell wall; F:protein serine/threonine kinase activity; P:protein phosphorylation; C:anchored component of plasma membrane; F:ATP binding; C:plasmodesma; P:response to abscisic acid; P:positive regulation of secondary growth; C:cytosol	EC:2.7.11	Transferring phosphorus-containing groups
CotAD_05290	Leucine-rich repeat kinase family	618	20	0	77.25	27	P:GO:0009793; P:GO:0007030; P:GO:0009556; P:GO:0046777; C:GO:0005576; F:GO:0005524; F:GO:0004713; C:GO:0005768; P:GO:0008219; F:GO:0046982; P:GO:0016032; P:GO:0051607; P:GO:0050832; F:GO:0033612; P:GO:0010152; F:GO:0042802; P:GO:0010150; P:GO:0007169; P:GO:0009742; C:GO:0043234; P:GO:0042742; C:GO:0005886; F:GO:0004675; P:GO:0002229; C:GO:0016021; P:GO:0010227; P:GO:0016049	P:embryo development ending in seed dormancy; P:Golgi organization; P:microsporogenesis; P:protein autophosphorylation; C:extracellular region; F:ATP binding; F:protein tyrosine kinase activity; C:endosome; P:cell death; F:protein heterodimerization activity; P:viral process; P:defense response to virus; P:defense response to fungus; F:receptor serine/threonine kinase binding; P:pollen maturation…	EC:2.7.10; EC:2.7.11	Transferring phosphorus-containing groups; Transferring phosphorus-containing groups
CotAD_05438	receptor kinase	605	20	0	65.7	18	P:GO:1900150; P:GO:0007275; P:GO:0007169; P:GO:0060548; C:GO:0005576; F:GO:0004674; P:GO:0006468; P:GO:1900425; P:GO:0042742; C:GO:0005886; P:GO:0044702; P:GO:0048869; C:GO:0005634; F:GO:0005524; P:GO:0003006; C:GO:0009507; C:GO:0009506; F:GO:0033612	P:regulation of defense response to fungus; P:multicellular organism development; P:transmembrane receptor protein tyrosine kinase signaling pathway; P:negative regulation of cell death; C:extracellular region; F:protein serine/threonine kinase activity; P:protein phosphorylation; P:negative regulation of defense response to bacterium; P:defense response to bacterium; C:plasma membrane; P:single …	EC:2.7.11	Transferring phosphorus-containing groups
CotAD_05471	leucine-rich repeat receptor	1140	20	0	57.9	19	P:GO:0010152; P:GO:0009651; P:GO:0010073; P:GO:0051260; P:GO:0007169; P:GO:0006468; P:GO:0009846; P:GO:0009945; P:GO:0048508; C:GO:0005886; P:GO:0009414; P:GO:0009942; C:GO:0005777; F:GO:0005524; P:GO:0009409; F:GO:0004702; P:GO:0009738; P:GO:0048653; P:GO:0009808	P:pollen maturation; P:response to salt stress; P:meristem maintenance; P:protein homooligomerization; P:transmembrane receptor protein tyrosine kinase signaling pathway; P:protein phosphorylation; P:pollen germination; P:radial axis specification; P:embryonic meristem development; C:plasma membrane; P:response to water deprivation; P:longitudinal axis specification; C:peroxisome; F:ATP binding; …	EC:2.7.11	Transferring phosphorus-containing groups
CotAD_05661	Leucine-rich repeat kinase family	724	20	0	63.1	10	F:GO:0005515; C:GO:0043231; P:GO:0010183; C:GO:0012505; P:GO:0007166; P:GO:0016310; P:GO:0048765; F:GO:0004674; C:GO:0005886; C:GO:0090406	F:protein binding; C:intracellular membrane-bounded organelle; P:pollen tube guidance; C:endomembrane system; P:cell surface receptor signaling pathway; P:phosphorylation; P:root hair cell differentiation; F:protein serine/threonine kinase activity; C:plasma membrane; C:pollen tube	EC:2.7.11	Transferring phosphorus-containing groups
CotAD_05855	Leucine-rich receptor kinase family	1078	20	0	64.2	6	F:GO:0005515; P:GO:0010082; P:GO:0010449; F:GO:0004672; C:GO:0005886; P:GO:0009987	F:protein binding; P:regulation of root meristem growth; P:root meristem growth; F:protein kinase activity; C:plasma membrane; P:cellular process
CotAD_06159	receptor kinase	973	20	0	55.35	9	P:GO:0002764; C:GO:0009507; F:GO:0005515; P:GO:0010204; F:GO:0004672; P:GO:0016045; P:GO:0010359; P:GO:0009626; C:GO:0005886	P:immune response-regulating signaling pathway; C:chloroplast; F:protein binding; P:defense response signaling pathway, resistance gene-independent; F:protein kinase activity; P:detection of bacterium; P:regulation of anion channel activity; P:plant-type hypersensitive response; C:plasma membrane
CotAD_06290	Leucine-rich receptor kinase family	957	20	0	59.15	17	P:GO:1902025; P:GO:0010051; P:GO:0007169; P:GO:0046777; P:GO:0009960; F:GO:0004674; P:GO:0009845; C:GO:0005886; F:GO:0005524; P:GO:0006979; P:GO:0045490; F:GO:0005515; P:GO:0010468; F:GO:0017046; P:GO:0010227; P:GO:0090548; P:GO:0010102	P:nitrate import; P:xylem and phloem pattern formation; P:transmembrane receptor protein tyrosine kinase signaling pathway; P:protein autophosphorylation; P:endosperm development; F:protein serine/threonine kinase activity; P:seed germination; C:plasma membrane; F:ATP binding; P:response to oxidative stress; P:pectin catabolic process; F:protein binding; P:regulation of gene expression; F:peptide…	EC:2.7.11	Transferring phosphorus-containing groups
CotAD_06671	root hair specific 16	805	20	0	60	3	C:GO:0016020; P:GO:0016310; F:GO:0016301	C:membrane; P:phosphorylation; F:kinase activity
CotAD_06868	receptor kinase	734	20	0	55.6	15	F:GO:0042802; P:GO:0007169; P:GO:0009555; P:GO:0048657; F:GO:0046983; P:GO:0009741; F:GO:0004674; P:GO:0006468; C:GO:0005773; C:GO:0005886; P:GO:0009755; F:GO:0005524; C:GO:0005768; P:GO:0032989; P:GO:0048580	F:identical protein binding; P:transmembrane receptor protein tyrosine kinase signaling pathway; P:pollen development; P:anther wall tapetum cell differentiation; F:protein dimerization activity; P:response to brassinosteroid; F:protein serine/threonine kinase activity; P:protein phosphorylation; C:vacuole; C:plasma membrane; P:hormone-mediated signaling pathway; F:ATP binding; C:endosome; P:cell…	EC:2.7.11	Transferring phosphorus-containing groups
CotAD_06952	Leucine-rich repeat kinase family	583	20	2.97e-60	45.75	3	C:GO:0016020; P:GO:0009987; C:GO:0071944	C:membrane; P:cellular process; C:cell periphery
CotAD_07215	Leucine-rich repeat kinase family	343	20	3.27e-108	55.95	8	F:GO:0005515; P:GO:0009860; P:GO:0016310; F:GO:0004674; P:GO:0009846; C:GO:0016324; C:GO:0090406; P:GO:0080092	F:protein binding; P:pollen tube growth; P:phosphorylation; F:protein serine/threonine kinase activity; P:pollen germination; C:apical plasma membrane; C:pollen tube; P:regulation of pollen tube growth	EC:2.7.11	Transferring phosphorus-containing groups
CotAD_07244	Leucine-rich repeat kinase family	982	20	0	54.75	9	P:GO:0002764; C:GO:0009507; F:GO:0005515; P:GO:0010204; F:GO:0004672; P:GO:0016045; P:GO:0010359; P:GO:0009626; C:GO:0005886	P:immune response-regulating signaling pathway; C:chloroplast; F:protein binding; P:defense response signaling pathway, resistance gene-independent; F:protein kinase activity; P:detection of bacterium; P:regulation of anion channel activity; P:plant-type hypersensitive response; C:plasma membrane
CotAD_07407	Leucine-rich repeat receptor kinase family	1021	20	0	56.95	11	P:GO:0048364; C:GO:0009506; F:GO:0005515; P:GO:0010183; F:GO:0016301; P:GO:0048507; P:GO:0050789; C:GO:0005886; P:GO:0006950; P:GO:0009987; C:GO:0090406	P:root development; C:plasmodesma; F:protein binding; P:pollen tube guidance; F:kinase activity; P:meristem development; P:regulation of biological process; C:plasma membrane; P:response to stress; P:cellular process; C:pollen tube
CotAD_07408	Leucine-rich repeat receptor kinase family	1020	20	0	56.8	8	C:GO:0009506; F:GO:0005515; P:GO:0010183; F:GO:0016301; P:GO:0044699; P:GO:0050789; C:GO:0005886; C:GO:0090406	C:plasmodesma; F:protein binding; P:pollen tube guidance; F:kinase activity; P:single-organism process; P:regulation of biological process; C:plasma membrane; C:pollen tube
CotAD_07409	Leucine-rich repeat receptor kinase family	1021	20	0	57.45	10	C:GO:0009506; F:GO:0005515; P:GO:0048731; P:GO:0010183; F:GO:0004672; P:GO:0050789; C:GO:0005886; P:GO:0009888; P:GO:0009987; C:GO:0090406	C:plasmodesma; F:protein binding; P:system development; P:pollen tube guidance; F:protein kinase activity; P:regulation of biological process; C:plasma membrane; P:tissue development; P:cellular process; C:pollen tube
CotAD_07539	Leucine-rich receptor kinase family	983	20	0	63.3	18	P:GO:1902025; P:GO:0010051; P:GO:0007169; P:GO:0046777; P:GO:0009960; F:GO:0004674; P:GO:0009845; C:GO:0005886; F:GO:0005524; P:GO:0006979; P:GO:0045490; F:GO:0005515; C:GO:0016021; P:GO:0010468; F:GO:0017046; P:GO:0010227; P:GO:0090548; P:GO:0010102	P:nitrate import; P:xylem and phloem pattern formation; P:transmembrane receptor protein tyrosine kinase signaling pathway; P:protein autophosphorylation; P:endosperm development; F:protein serine/threonine kinase activity; P:seed germination; C:plasma membrane; F:ATP binding; P:response to oxidative stress; P:pectin catabolic process; F:protein binding; C:integral component of membrane; P:regula…	EC:2.7.11	Transferring phosphorus-containing groups
CotAD_07850	Leucine-rich repeat kinase family	772	20	0	58.8	6	F:GO:0005524; C:GO:0005739; P:GO:0007169; F:GO:0004674; P:GO:0006468; C:GO:0005886	F:ATP binding; C:mitochondrion; P:transmembrane receptor protein tyrosine kinase signaling pathway; F:protein serine/threonine kinase activity; P:protein phosphorylation; C:plasma membrane	EC:2.7.11	Transferring phosphorus-containing groups
CotAD_07880	Leucine-rich repeat kinase family	768	20	0	58.6	6	F:GO:0005524; C:GO:0005739; P:GO:0007169; F:GO:0004674; P:GO:0006468; C:GO:0005886	F:ATP binding; C:mitochondrion; P:transmembrane receptor protein tyrosine kinase signaling pathway; F:protein serine/threonine kinase activity; P:protein phosphorylation; C:plasma membrane	EC:2.7.11	Transferring phosphorus-containing groups
CotAD_08161	receptor kinase	1097	20	0	52.35	8	P:GO:0009617; C:GO:0005768; P:GO:0051179; C:GO:0016020; P:GO:0051716; F:GO:0005488; P:GO:0006952; P:GO:0050789	P:response to bacterium; C:endosome; P:localization; C:membrane; P:cellular response to stimulus; F:binding; P:defense response; P:regulation of biological process
CotAD_08372	Leucine-rich repeat kinase family	854	20	0	59	9	F:GO:0005524; C:GO:0009506; P:GO:0048731; P:GO:0007169; C:GO:0009505; F:GO:0004674; P:GO:0006468; C:GO:0005886; P:GO:0009888	F:ATP binding; C:plasmodesma; P:system development; P:transmembrane receptor protein tyrosine kinase signaling pathway; C:plant-type cell wall; F:protein serine/threonine kinase activity; P:protein phosphorylation; C:plasma membrane; P:tissue development	EC:2.7.11	Transferring phosphorus-containing groups
CotAD_08450	Leucine-rich receptor kinase family	877	20	0	58.9	15	P:GO:1902025; P:GO:0007169; P:GO:0046777; F:GO:0042277; F:GO:0004674; P:GO:0009845; C:GO:0005886; F:GO:0005524; P:GO:0006979; P:GO:0045490; F:GO:0005515; P:GO:0010468; P:GO:0010227; P:GO:0090548; P:GO:0010102	P:nitrate import; P:transmembrane receptor protein tyrosine kinase signaling pathway; P:protein autophosphorylation; F:peptide binding; F:protein serine/threonine kinase activity; P:seed germination; C:plasma membrane; F:ATP binding; P:response to oxidative stress; P:pectin catabolic process; F:protein binding; P:regulation of gene expression; P:floral organ abscission; P:response to nitrate star…	EC:2.7.11	Transferring phosphorus-containing groups
CotAD_08452	Leucine-rich receptor kinase family	1026	20	0	66.35	23	P:GO:0010075; P:GO:0007172; P:GO:0010183; P:GO:0007169; P:GO:0046777; P:GO:0048437; C:GO:0000325; P:GO:0009934; F:GO:0043621; C:GO:0005886; P:GO:0048364; P:GO:0051301; F:GO:0005524; F:GO:0004702; C:GO:0009506; P:GO:0001944; C:GO:0016021; P:GO:0030154; P:GO:0010067; P:GO:0010089; F:GO:0033612; C:GO:0090406; P:GO:0010223	P:regulation of meristem growth; P:signal complex assembly; P:pollen tube guidance; P:transmembrane receptor protein tyrosine kinase signaling pathway; P:protein autophosphorylation; P:floral organ development; C:plant-type vacuole; P:regulation of meristem structural organization; F:protein self-association; C:plasma membrane; P:root development; P:cell division; F:ATP binding; F:signal transduc…	EC:2.7.11	Transferring phosphorus-containing groups
CotAD_08453	Leucine-rich receptor kinase family	987	20	0	66.7	23	P:GO:0007172; P:GO:0010082; P:GO:0010183; P:GO:0007169; P:GO:0046777; P:GO:0048437; C:GO:0000325; P:GO:0009934; F:GO:0043621; C:GO:0005886; P:GO:0051301; F:GO:0005524; F:GO:0004702; C:GO:0009506; P:GO:0010449; P:GO:0001944; C:GO:0016021; P:GO:0030154; P:GO:0010067; P:GO:0010089; F:GO:0033612; C:GO:0090406; P:GO:0010223	P:signal complex assembly; P:regulation of root meristem growth; P:pollen tube guidance; P:transmembrane receptor protein tyrosine kinase signaling pathway; P:protein autophosphorylation; P:floral organ development; C:plant-type vacuole; P:regulation of meristem structural organization; F:protein self-association; C:plasma membrane; P:cell division; F:ATP binding; F:signal transducer, downstream …	EC:2.7.11	Transferring phosphorus-containing groups
CotAD_08621	Leucine-rich receptor kinase family	1060	20	0	56.6	10	P:GO:1901529; F:GO:0005524; P:GO:1901528; F:GO:0005515; C:GO:0005829; P:GO:0007169; F:GO:0004674; P:GO:0006468; C:GO:0005886; P:GO:1901527	P:positive regulation of anion channel activity; F:ATP binding; P:hydrogen peroxide mediated signaling pathway involved in stomatal movement; F:protein binding; C:cytosol; P:transmembrane receptor protein tyrosine kinase signaling pathway; F:protein serine/threonine kinase activity; P:protein phosphorylation; C:plasma membrane; P:abscisic acid-activated signaling pathway involved in stomatal move…	EC:2.7.11	Transferring phosphorus-containing groups
CotAD_08656	Leucine-rich repeat kinase family	688	20	6.65e-172	63.8	10	C:GO:0005634; F:GO:0005515; P:GO:0010183; C:GO:0012505; F:GO:0004672; P:GO:0007166; P:GO:0016310; P:GO:0048765; C:GO:0005886; C:GO:0090406	C:nucleus; F:protein binding; P:pollen tube guidance; C:endomembrane system; F:protein kinase activity; P:cell surface receptor signaling pathway; P:phosphorylation; P:root hair cell differentiation; C:plasma membrane; C:pollen tube
CotAD_09068	Leucine-rich repeat kinase family	604	20	0	65.9	8	F:GO:0005524; P:GO:0009826; P:GO:0048354; C:GO:0016021; P:GO:0009664; F:GO:0004674; P:GO:0006468; C:GO:0005886	F:ATP binding; P:unidimensional cell growth; P:mucilage biosynthetic process involved in seed coat development; C:integral component of membrane; P:plant-type cell wall organization; F:protein serine/threonine kinase activity; P:protein phosphorylation; C:plasma membrane	EC:2.7.11	Transferring phosphorus-containing groups
CotAD_09151	Leucine-rich repeat kinase family	914	20	0	59.85	8	F:GO:0005524; C:GO:0009506; P:GO:0048856; P:GO:0007169; C:GO:0009505; F:GO:0004674; P:GO:0006468; C:GO:0005886	F:ATP binding; C:plasmodesma; P:anatomical structure development; P:transmembrane receptor protein tyrosine kinase signaling pathway; C:plant-type cell wall; F:protein serine/threonine kinase activity; P:protein phosphorylation; C:plasma membrane	EC:2.7.11	Transferring phosphorus-containing groups
CotAD_09217	Leucine-rich repeat kinase family	782	20	0	61.65	7	C:GO:0009507; P:GO:0010070; C:GO:0016020; F:GO:0004672; F:GO:0005488; P:GO:0006468; C:GO:0071944	C:chloroplast; P:zygote asymmetric cell division; C:membrane; F:protein kinase activity; F:binding; P:protein phosphorylation; C:cell periphery
CotAD_09317	receptor kinase	951	20	0	66.8	12	F:GO:0005524; F:GO:0019901; C:GO:0009506; C:GO:0016021; P:GO:0009555; C:GO:0005794; P:GO:0007166; C:GO:0005576; C:GO:0009505; P:GO:0006468; C:GO:0005886; F:GO:0004675	F:ATP binding; F:protein kinase binding; C:plasmodesma; C:integral component of membrane; P:pollen development; C:Golgi apparatus; P:cell surface receptor signaling pathway; C:extracellular region; C:plant-type cell wall; P:protein phosphorylation; C:plasma membrane; F:transmembrane receptor protein serine/threonine kinase activity	EC:2.7.11	Transferring phosphorus-containing groups
CotAD_09333	Leucine-rich repeat kinase family	618	20	0	77.25	27	P:GO:0009793; P:GO:0007030; P:GO:0009556; P:GO:0046777; C:GO:0005576; F:GO:0005524; F:GO:0004713; C:GO:0005768; P:GO:0008219; F:GO:0046982; P:GO:0016032; P:GO:0051607; P:GO:0050832; F:GO:0033612; P:GO:0010152; F:GO:0042802; P:GO:0010150; P:GO:0007169; P:GO:0009742; C:GO:0043234; P:GO:0042742; C:GO:0005886; F:GO:0004675; P:GO:0002229; C:GO:0016021; P:GO:0010227; P:GO:0016049	P:embryo development ending in seed dormancy; P:Golgi organization; P:microsporogenesis; P:protein autophosphorylation; C:extracellular region; F:ATP binding; F:protein tyrosine kinase activity; C:endosome; P:cell death; F:protein heterodimerization activity; P:viral process; P:defense response to virus; P:defense response to fungus; F:receptor serine/threonine kinase binding; P:pollen maturation…	EC:2.7.10; EC:2.7.11	Transferring phosphorus-containing groups; Transferring phosphorus-containing groups
CotAD_09352	Leucine-rich repeat kinase family	691	20	0	56.7	10	C:GO:0009570; F:GO:0005524; F:GO:0005515; P:GO:0007169; P:GO:0046777; C:GO:0009505; F:GO:0004674; C:GO:0005886; C:GO:0090406; P:GO:0010069	C:chloroplast stroma; F:ATP binding; F:protein binding; P:transmembrane receptor protein tyrosine kinase signaling pathway; P:protein autophosphorylation; C:plant-type cell wall; F:protein serine/threonine kinase activity; C:plasma membrane; C:pollen tube; P:zygote asymmetric cytokinesis in embryo sac	EC:2.7.11	Transferring phosphorus-containing groups
CotAD_09444	Leucine-rich repeat kinase family	1009	20	0	56	10	P:GO:0002764; C:GO:0009507; F:GO:0005515; F:GO:0019199; P:GO:0010204; C:GO:0012505; P:GO:0016045; P:GO:0010359; P:GO:0009626; C:GO:0005886	P:immune response-regulating signaling pathway; C:chloroplast; F:protein binding; F:transmembrane receptor protein kinase activity; P:defense response signaling pathway, resistance gene-independent; C:endomembrane system; P:detection of bacterium; P:regulation of anion channel activity; P:plant-type hypersensitive response; C:plasma membrane	EC:2.7.11	Transferring phosphorus-containing groups
CotAD_09577	Leucine-rich repeat kinase family	1054	20	0	59.7	10	P:GO:1901529; F:GO:0005524; P:GO:1901528; F:GO:0005515; C:GO:0005829; P:GO:0007169; F:GO:0004674; P:GO:0006468; C:GO:0005886; P:GO:1901527	P:positive regulation of anion channel activity; F:ATP binding; P:hydrogen peroxide mediated signaling pathway involved in stomatal movement; F:protein binding; C:cytosol; P:transmembrane receptor protein tyrosine kinase signaling pathway; F:protein serine/threonine kinase activity; P:protein phosphorylation; C:plasma membrane; P:abscisic acid-activated signaling pathway involved in stomatal move…	EC:2.7.11	Transferring phosphorus-containing groups
CotAD_09713	Leucine-rich repeat kinase family	624	20	5.47e-177	57.55	11	C:GO:0090404; F:GO:0042802; C:GO:0009506; P:GO:0009860; C:GO:0005737; P:GO:0010183; P:GO:0016310; F:GO:0004674; P:GO:0009846; C:GO:0016324; P:GO:0080092	C:pollen tube tip; F:identical protein binding; C:plasmodesma; P:pollen tube growth; C:cytoplasm; P:pollen tube guidance; P:phosphorylation; F:protein serine/threonine kinase activity; P:pollen germination; C:apical plasma membrane; P:regulation of pollen tube growth	EC:2.7.11	Transferring phosphorus-containing groups
CotAD_09747	leucine-rich repeat receptor	728	20	0	67.35	11	C:GO:0005634; F:GO:0005524; C:GO:0009506; C:GO:0016021; C:GO:0005829; P:GO:0007169; C:GO:0005576; P:GO:0006468; P:GO:0007623; C:GO:0005886; F:GO:0004675	C:nucleus; F:ATP binding; C:plasmodesma; C:integral component of membrane; C:cytosol; P:transmembrane receptor protein tyrosine kinase signaling pathway; C:extracellular region; P:protein phosphorylation; P:circadian rhythm; C:plasma membrane; F:transmembrane receptor protein serine/threonine kinase activity	EC:2.7.11	Transferring phosphorus-containing groups
CotAD_10082	Leucine-rich receptor kinase family	1012	20	0	52.05	18	P:GO:0010152; P:GO:0009651; P:GO:0010073; P:GO:0051260; F:GO:0004674; F:GO:0005488; P:GO:0009846; P:GO:0009945; P:GO:0048508; F:GO:0004871; C:GO:0005886; P:GO:0009414; P:GO:0009942; C:GO:0005777; P:GO:0009409; P:GO:0009738; P:GO:0048653; P:GO:0009808	P:pollen maturation; P:response to salt stress; P:meristem maintenance; P:protein homooligomerization; F:protein serine/threonine kinase activity; F:binding; P:pollen germination; P:radial axis specification; P:embryonic meristem development; F:signal transducer activity; C:plasma membrane; P:response to water deprivation; P:longitudinal axis specification; C:peroxisome; P:response to cold; P:abs…	EC:2.7.11	Transferring phosphorus-containing groups
CotAD_10129	receptor kinase	605	20	0	65.85	18	P:GO:1900150; P:GO:0007275; P:GO:0007169; P:GO:0060548; C:GO:0005576; F:GO:0004674; P:GO:0006468; P:GO:1900425; P:GO:0042742; C:GO:0005886; P:GO:0044702; P:GO:0048869; C:GO:0005634; F:GO:0005524; P:GO:0003006; C:GO:0009507; C:GO:0009506; F:GO:0033612	P:regulation of defense response to fungus; P:multicellular organism development; P:transmembrane receptor protein tyrosine kinase signaling pathway; P:negative regulation of cell death; C:extracellular region; F:protein serine/threonine kinase activity; P:protein phosphorylation; P:negative regulation of defense response to bacterium; P:defense response to bacterium; C:plasma membrane; P:single …	EC:2.7.11	Transferring phosphorus-containing groups
CotAD_10180	leucine-rich repeat receptor	1140	20	0	57.7	21	P:GO:0010152; P:GO:0009651; P:GO:0010073; P:GO:0051260; P:GO:0007169; P:GO:0006468; P:GO:0009846; P:GO:0009945; P:GO:0048508; C:GO:0005886; P:GO:0009414; P:GO:0009942; P:GO:0048364; C:GO:0005777; F:GO:0005524; P:GO:0009409; F:GO:0004702; P:GO:0009738; P:GO:0048653; P:GO:0009808; C:GO:0016021	P:pollen maturation; P:response to salt stress; P:meristem maintenance; P:protein homooligomerization; P:transmembrane receptor protein tyrosine kinase signaling pathway; P:protein phosphorylation; P:pollen germination; P:radial axis specification; P:embryonic meristem development; C:plasma membrane; P:response to water deprivation; P:longitudinal axis specification; P:root development; C:peroxis…	EC:2.7.11	Transferring phosphorus-containing groups
CotAD_10397	receptor kinase	812	20	0	60.55	23	P:GO:0007172; P:GO:1902025; P:GO:0010051; P:GO:0046777; C:GO:0000325; F:GO:0004674; P:GO:0009934; F:GO:0043621; C:GO:0005886; P:GO:0051301; P:GO:0045490; C:GO:0009506; P:GO:0001944; P:GO:0010468; P:GO:0030154; F:GO:0017046; P:GO:0010227; P:GO:0010067; P:GO:0010089; F:GO:0033612; P:GO:0090548; P:GO:0010102; P:GO:0010223	P:signal complex assembly; P:nitrate import; P:xylem and phloem pattern formation; P:protein autophosphorylation; C:plant-type vacuole; F:protein serine/threonine kinase activity; P:regulation of meristem structural organization; F:protein self-association; C:plasma membrane; P:cell division; P:pectin catabolic process; C:plasmodesma; P:vasculature development; P:regulation of gene expression; P:…	EC:2.7.11	Transferring phosphorus-containing groups
CotAD_10941	receptor kinase	735	20	0	55.4	14	F:GO:0042802; P:GO:0007169; P:GO:0009555; P:GO:0048657; F:GO:0046983; P:GO:0009741; F:GO:0004674; P:GO:0006468; C:GO:0005773; C:GO:0005886; F:GO:0005524; C:GO:0005768; P:GO:0032989; P:GO:0048580	F:identical protein binding; P:transmembrane receptor protein tyrosine kinase signaling pathway; P:pollen development; P:anther wall tapetum cell differentiation; F:protein dimerization activity; P:response to brassinosteroid; F:protein serine/threonine kinase activity; P:protein phosphorylation; C:vacuole; C:plasma membrane; F:ATP binding; C:endosome; P:cellular component morphogenesis; P:regula…	EC:2.7.11	Transferring phosphorus-containing groups
CotAD_11338	Leucine-rich repeat kinase family	658	20	0	60.35	8	F:GO:0005524; F:GO:0005515; P:GO:0010183; P:GO:0007169; F:GO:0004674; P:GO:0006468; C:GO:0005886; C:GO:0090406	F:ATP binding; F:protein binding; P:pollen tube guidance; P:transmembrane receptor protein tyrosine kinase signaling pathway; F:protein serine/threonine kinase activity; P:protein phosphorylation; C:plasma membrane; C:pollen tube	EC:2.7.11	Transferring phosphorus-containing groups
CotAD_11428	Leucine-rich repeat kinase family	400	20	8.89e-176	61.55	8	F:GO:0005524; P:GO:0009826; P:GO:0048354; P:GO:0007169; P:GO:0009664; F:GO:0004674; P:GO:0006468; C:GO:0005886	F:ATP binding; P:unidimensional cell growth; P:mucilage biosynthetic process involved in seed coat development; P:transmembrane receptor protein tyrosine kinase signaling pathway; P:plant-type cell wall organization; F:protein serine/threonine kinase activity; P:protein phosphorylation; C:plasma membrane	EC:2.7.11	Transferring phosphorus-containing groups
CotAD_11446	Leucine-rich repeat receptor kinase family	1104	20	0	62.3	18	P:GO:0090558; P:GO:0010082; P:GO:0009793; P:GO:0009611; F:GO:0004383; P:GO:0007169; P:GO:0009753; C:GO:0005576; F:GO:0004674; P:GO:0006468; C:GO:0005886; F:GO:0001653; F:GO:0005524; C:GO:0009506; F:GO:0005515; P:GO:0006955; P:GO:0010449; C:GO:0016021	P:plant epidermis development; P:regulation of root meristem growth; P:embryo development ending in seed dormancy; P:response to wounding; F:guanylate cyclase activity; P:transmembrane receptor protein tyrosine kinase signaling pathway; P:response to jasmonic acid; C:extracellular region; F:protein serine/threonine kinase activity; P:protein phosphorylation; C:plasma membrane; F:peptide receptor …	EC:2.7.11; EC:4.6.1.2	Transferring phosphorus-containing groups; Guanylate cyclase
CotAD_11545	Leucine-rich receptor kinase family	1080	20	0	62.15	11	F:GO:0005524; P:GO:0090558; F:GO:0005515; P:GO:0010082; P:GO:0009793; P:GO:0010449; C:GO:0016021; P:GO:0007169; F:GO:0004674; P:GO:0006468; C:GO:0005886	F:ATP binding; P:plant epidermis development; F:protein binding; P:regulation of root meristem growth; P:embryo development ending in seed dormancy; P:root meristem growth; C:integral component of membrane; P:transmembrane receptor protein tyrosine kinase signaling pathway; F:protein serine/threonine kinase activity; P:protein phosphorylation; C:plasma membrane	EC:2.7.11	Transferring phosphorus-containing groups
CotAD_11871	Leucine-rich repeat kinase family	953	20	0	57.4	7	C:GO:0009506; P:GO:0007165; P:GO:0009555; C:GO:0005794; C:GO:0009505; C:GO:0005886; F:GO:0004675	C:plasmodesma; P:signal transduction; P:pollen development; C:Golgi apparatus; C:plant-type cell wall; C:plasma membrane; F:transmembrane receptor protein serine/threonine kinase activity	EC:2.7.11	Transferring phosphorus-containing groups
CotAD_12135	somatic embryogenesis receptor-like kinase 5	610	20	0	84.85	29	P:GO:0009793; P:GO:0007030; P:GO:0009556; P:GO:0046777; P:GO:0060548; F:GO:0008289; C:GO:0005789; F:GO:0005524; P:GO:0008219; F:GO:0004714; F:GO:0046982; P:GO:0050832; F:GO:0033612; P:GO:0010152; F:GO:0042802; P:GO:1900140; P:GO:0010150; P:GO:0009742; P:GO:0007166; C:GO:0043234; P:GO:0042742; C:GO:0005886; F:GO:0004675; P:GO:0002229; C:GO:0016021; C:GO:0010008; P:GO:0010227; P:GO:0010200; P:GO:00…	P:embryo development ending in seed dormancy; P:Golgi organization; P:microsporogenesis; P:protein autophosphorylation; P:negative regulation of cell death; F:lipid binding; C:endoplasmic reticulum membrane; F:ATP binding; P:cell death; F:transmembrane receptor protein tyrosine kinase activity; F:protein heterodimerization activity; P:defense response to fungus; F:receptor serine/threonine kinase…	EC:2.7.10; EC:2.7.10.1; EC:2.7.11	Transferring phosphorus-containing groups; Receptor protein-tyrosine kinase; Transferring phosphorus-containing groups
CotAD_12136	somatic embryogenesis receptor-like kinase 5	607	20	0	76.45	27	P:GO:0009793; P:GO:0007030; P:GO:0009556; P:GO:0046777; P:GO:0060548; F:GO:0005524; P:GO:0008219; F:GO:0004714; F:GO:0046982; P:GO:0050832; F:GO:0033612; P:GO:0010152; F:GO:0042802; P:GO:1900140; P:GO:0010150; P:GO:0009742; P:GO:0007166; C:GO:0043234; P:GO:0042742; C:GO:0005886; F:GO:0004675; P:GO:0002229; C:GO:0016021; C:GO:0010008; P:GO:0010227; P:GO:0010200; P:GO:0016049	P:embryo development ending in seed dormancy; P:Golgi organization; P:microsporogenesis; P:protein autophosphorylation; P:negative regulation of cell death; F:ATP binding; P:cell death; F:transmembrane receptor protein tyrosine kinase activity; F:protein heterodimerization activity; P:defense response to fungus; F:receptor serine/threonine kinase binding; P:pollen maturation; F:identical protein …	EC:2.7.10; EC:2.7.10.1; EC:2.7.11	Transferring phosphorus-containing groups; Receptor protein-tyrosine kinase; Transferring phosphorus-containing groups
CotAD_12535	Leucine-rich repeat kinase family	671	20	0	54.55	8	F:GO:0005524; C:GO:0009506; C:GO:0005618; C:GO:0016021; P:GO:0007169; F:GO:0004674; P:GO:0006468; C:GO:0005886	F:ATP binding; C:plasmodesma; C:cell wall; C:integral component of membrane; P:transmembrane receptor protein tyrosine kinase signaling pathway; F:protein serine/threonine kinase activity; P:protein phosphorylation; C:plasma membrane	EC:2.7.11	Transferring phosphorus-containing groups
CotAD_12568	Leucine-rich repeat receptor kinase family	1134	20	9.4e-174	54.05	7	C:GO:0009506; F:GO:0005515; P:GO:0007275; P:GO:0010183; F:GO:0016301; C:GO:0005886; C:GO:0090406	C:plasmodesma; F:protein binding; P:multicellular organism development; P:pollen tube guidance; F:kinase activity; C:plasma membrane; C:pollen tube
CotAD_13091	Leucine-rich repeat kinase family	893	20	0	62.35	9	F:GO:0019901; C:GO:0009506; P:GO:0007165; P:GO:0009555; C:GO:0005794; C:GO:0005576; C:GO:0009505; C:GO:0005886; F:GO:0004675	F:protein kinase binding; C:plasmodesma; P:signal transduction; P:pollen development; C:Golgi apparatus; C:extracellular region; C:plant-type cell wall; C:plasma membrane; F:transmembrane receptor protein serine/threonine kinase activity	EC:2.7.11	Transferring phosphorus-containing groups
CotAD_13103	receptor-kinase isolog	706	20	0	67.2	6	F:GO:0005524; C:GO:0016021; P:GO:0007169; F:GO:0004674; P:GO:0006468; C:GO:0005886	F:ATP binding; C:integral component of membrane; P:transmembrane receptor protein tyrosine kinase signaling pathway; F:protein serine/threonine kinase activity; P:protein phosphorylation; C:plasma membrane	EC:2.7.11	Transferring phosphorus-containing groups
CotAD_13173	leucine-rich repeat receptor	1127	20	0	55.55	19	P:GO:0010152; P:GO:0009651; P:GO:0010073; P:GO:0051260; P:GO:0007169; P:GO:0006468; P:GO:0009846; P:GO:0009945; P:GO:0048508; C:GO:0005886; P:GO:0009414; P:GO:0009942; C:GO:0005777; F:GO:0005524; P:GO:0009409; F:GO:0004702; P:GO:0009738; P:GO:0048653; P:GO:0009808	P:pollen maturation; P:response to salt stress; P:meristem maintenance; P:protein homooligomerization; P:transmembrane receptor protein tyrosine kinase signaling pathway; P:protein phosphorylation; P:pollen germination; P:radial axis specification; P:embryonic meristem development; C:plasma membrane; P:response to water deprivation; P:longitudinal axis specification; C:peroxisome; F:ATP binding; …	EC:2.7.11	Transferring phosphorus-containing groups
CotAD_13381	Leucine-rich repeat receptor kinase family	768	20	1.95e-152	54.45	10	P:GO:0090558; C:GO:0009506; F:GO:0005515; P:GO:0009793; P:GO:0048367; P:GO:0010183; P:GO:0009553; F:GO:0016301; C:GO:0005886; C:GO:0090406	P:plant epidermis development; C:plasmodesma; F:protein binding; P:embryo development ending in seed dormancy; P:shoot system development; P:pollen tube guidance; P:embryo sac development; F:kinase activity; C:plasma membrane; C:pollen tube
CotAD_13406	Leucine-rich receptor kinase family	1544	20	0	63.8	22	P:GO:0010075; P:GO:0007172; P:GO:0010183; P:GO:0007169; P:GO:0046777; P:GO:0048437; C:GO:0000325; P:GO:0009934; F:GO:0043621; C:GO:0005886; P:GO:0051301; F:GO:0005524; F:GO:0004702; C:GO:0009506; P:GO:0001944; C:GO:0016021; P:GO:0030154; P:GO:0010067; P:GO:0010089; F:GO:0033612; C:GO:0090406; P:GO:0010223	P:regulation of meristem growth; P:signal complex assembly; P:pollen tube guidance; P:transmembrane receptor protein tyrosine kinase signaling pathway; P:protein autophosphorylation; P:floral organ development; C:plant-type vacuole; P:regulation of meristem structural organization; F:protein self-association; C:plasma membrane; P:cell division; F:ATP binding; F:signal transducer, downstream of re…	EC:2.7.11	Transferring phosphorus-containing groups
CotAD_13565	leucine-rich repeat receptor	944	20	0	53.45	7	P:GO:0048364; F:GO:0004672; F:GO:0005488; P:GO:0048507; P:GO:0050789; C:GO:0005886; P:GO:0009987	P:root development; F:protein kinase activity; F:binding; P:meristem development; P:regulation of biological process; C:plasma membrane; P:cellular process
CotAD_14259	Leucine-rich receptor kinase family	983	20	0	61.45	23	P:GO:0010075; P:GO:0007172; P:GO:0010183; P:GO:0007169; P:GO:0046777; P:GO:0048437; C:GO:0000325; F:GO:0004674; P:GO:0009934; F:GO:0043621; C:GO:0005886; P:GO:0048364; P:GO:0051301; F:GO:0005524; C:GO:0009506; P:GO:0001944; C:GO:0016021; P:GO:0030154; P:GO:0010067; P:GO:0010089; F:GO:0033612; C:GO:0090406; P:GO:0010223	P:regulation of meristem growth; P:signal complex assembly; P:pollen tube guidance; P:transmembrane receptor protein tyrosine kinase signaling pathway; P:protein autophosphorylation; P:floral organ development; C:plant-type vacuole; F:protein serine/threonine kinase activity; P:regulation of meristem structural organization; F:protein self-association; C:plasma membrane; P:root development; P:cel…	EC:2.7.11	Transferring phosphorus-containing groups
CotAD_14436	Leucine-rich repeat receptor kinase family	1134	20	1.06e-174	54.15	7	C:GO:0009506; F:GO:0005515; P:GO:0007275; P:GO:0010183; F:GO:0016301; C:GO:0005886; C:GO:0090406	C:plasmodesma; F:protein binding; P:multicellular organism development; P:pollen tube guidance; F:kinase activity; C:plasma membrane; C:pollen tube
CotAD_14467	Leucine-rich repeat kinase family	670	20	0	55	8	F:GO:0005524; C:GO:0009506; C:GO:0005618; C:GO:0016021; P:GO:0007169; F:GO:0004674; P:GO:0006468; C:GO:0005886	F:ATP binding; C:plasmodesma; C:cell wall; C:integral component of membrane; P:transmembrane receptor protein tyrosine kinase signaling pathway; F:protein serine/threonine kinase activity; P:protein phosphorylation; C:plasma membrane	EC:2.7.11	Transferring phosphorus-containing groups
CotAD_14939	Leucine-rich receptor kinase family	1105	20	0	61.5	10	F:GO:0005524; P:GO:0090558; P:GO:0010082; P:GO:0009793; C:GO:0016021; P:GO:0007169; P:GO:0009553; F:GO:0004674; P:GO:0006468; C:GO:0005886	F:ATP binding; P:plant epidermis development; P:regulation of root meristem growth; P:embryo development ending in seed dormancy; C:integral component of membrane; P:transmembrane receptor protein tyrosine kinase signaling pathway; P:embryo sac development; F:protein serine/threonine kinase activity; P:protein phosphorylation; C:plasma membrane	EC:2.7.11	Transferring phosphorus-containing groups
CotAD_14975	Leucine-rich receptor kinase family	1006	20	0	62.15	23	P:GO:0010075; P:GO:0007172; P:GO:0010183; P:GO:0007169; P:GO:0046777; P:GO:0048437; C:GO:0000325; F:GO:0004674; P:GO:0009934; F:GO:0043621; C:GO:0005886; P:GO:0048364; P:GO:0051301; F:GO:0005524; C:GO:0009506; P:GO:0001944; C:GO:0016021; P:GO:0030154; P:GO:0010067; P:GO:0010089; F:GO:0033612; C:GO:0090406; P:GO:0010223	P:regulation of meristem growth; P:signal complex assembly; P:pollen tube guidance; P:transmembrane receptor protein tyrosine kinase signaling pathway; P:protein autophosphorylation; P:floral organ development; C:plant-type vacuole; F:protein serine/threonine kinase activity; P:regulation of meristem structural organization; F:protein self-association; C:plasma membrane; P:root development; P:cel…	EC:2.7.11	Transferring phosphorus-containing groups
CotAD_15034	Leucine-rich receptor kinase family	816	20	0	59.55	14	P:GO:1902025; P:GO:0010051; P:GO:0007169; P:GO:0046777; P:GO:0009960; F:GO:0004674; P:GO:0009845; C:GO:0005886; F:GO:0005524; P:GO:0006979; F:GO:0005515; P:GO:0099402; F:GO:0017046; P:GO:0090548	P:nitrate import; P:xylem and phloem pattern formation; P:transmembrane receptor protein tyrosine kinase signaling pathway; P:protein autophosphorylation; P:endosperm development; F:protein serine/threonine kinase activity; P:seed germination; C:plasma membrane; F:ATP binding; P:response to oxidative stress; F:protein binding; P:plant organ development; F:peptide hormone binding; P:response to ni…	EC:2.7.11	Transferring phosphorus-containing groups
CotAD_15160	leucine-rich repeat receptor	1118	20	0	58.8	15	P:GO:0007275; P:GO:0009611; F:GO:0004383; P:GO:0007169; P:GO:0009753; F:GO:0042277; F:GO:0004674; P:GO:0006468; P:GO:0042742; C:GO:0005886; F:GO:0001653; F:GO:0005524; C:GO:0009506; F:GO:0005515; P:GO:0045087	P:multicellular organism development; P:response to wounding; F:guanylate cyclase activity; P:transmembrane receptor protein tyrosine kinase signaling pathway; P:response to jasmonic acid; F:peptide binding; F:protein serine/threonine kinase activity; P:protein phosphorylation; P:defense response to bacterium; C:plasma membrane; F:peptide receptor activity; F:ATP binding; C:plasmodesma; F:protein…	EC:2.7.11; EC:4.6.1.2	Transferring phosphorus-containing groups; Guanylate cyclase
CotAD_15200	Leucine-rich repeat kinase family	1029	20	0	57.3	11	P:GO:1901529; P:GO:1901528; F:GO:0005515; P:GO:0048856; C:GO:0005829; F:GO:0004672; P:GO:0006468; C:GO:0005886; P:GO:1901527; P:GO:0032501; P:GO:0044767	P:positive regulation of anion channel activity; P:hydrogen peroxide mediated signaling pathway involved in stomatal movement; F:protein binding; P:anatomical structure development; C:cytosol; F:protein kinase activity; P:protein phosphorylation; C:plasma membrane; P:abscisic acid-activated signaling pathway involved in stomatal movement; P:multicellular organismal process; P:single-organism deve…
CotAD_15231	Leucine-rich repeat kinase family	614	20	0	60.5	10	F:GO:0005515; P:GO:0009860; C:GO:0005737; P:GO:0016310; F:GO:0004674; P:GO:0009846; C:GO:0016324; P:GO:0050896; C:GO:0090406; P:GO:0080092	F:protein binding; P:pollen tube growth; C:cytoplasm; P:phosphorylation; F:protein serine/threonine kinase activity; P:pollen germination; C:apical plasma membrane; P:response to stimulus; C:pollen tube; P:regulation of pollen tube growth	EC:2.7.11	Transferring phosphorus-containing groups
CotAD_15239	leucine-rich repeat receptor	525	20	0	64.6	19	P:GO:0009556; P:GO:0009611; F:GO:0004383; P:GO:0007169; P:GO:0009664; P:GO:0045851; F:GO:0004674; P:GO:0006468; C:GO:0005886; F:GO:0001653; F:GO:0005524; C:GO:0009507; P:GO:0009826; F:GO:0004888; F:GO:0005515; P:GO:0045087; C:GO:0016021; P:GO:0031347; P:GO:0010234	P:microsporogenesis; P:response to wounding; F:guanylate cyclase activity; P:transmembrane receptor protein tyrosine kinase signaling pathway; P:plant-type cell wall organization; P:pH reduction; F:protein serine/threonine kinase activity; P:protein phosphorylation; C:plasma membrane; F:peptide receptor activity; F:ATP binding; C:chloroplast; P:unidimensional cell growth; F:transmembrane signalin…	EC:2.7.11; EC:4.6.1.2	Transferring phosphorus-containing groups; Guanylate cyclase
CotAD_15243	Leucine-rich receptor kinase family	900	20	0	53.6	12	P:GO:0009617; C:GO:0005768; P:GO:0051179; P:GO:0007165; C:GO:0016020; P:GO:0033554; P:GO:0016310; F:GO:0004674; F:GO:0005488; P:GO:0006952; P:GO:0002376; P:GO:0050776	P:response to bacterium; C:endosome; P:localization; P:signal transduction; C:membrane; P:cellular response to stress; P:phosphorylation; F:protein serine/threonine kinase activity; F:binding; P:defense response; P:immune system process; P:regulation of immune response	EC:2.7.11	Transferring phosphorus-containing groups
CotAD_15772	Leucine-rich receptor kinase family	1048	20	0	54.55	17	P:GO:0010152; P:GO:0009651; P:GO:0010073; P:GO:0051260; P:GO:0009846; P:GO:0009945; P:GO:0048508; C:GO:0005886; P:GO:0009414; P:GO:0009942; C:GO:0005777; P:GO:0009409; F:GO:0004702; P:GO:0009738; F:GO:0005515; P:GO:0048653; P:GO:0009808	P:pollen maturation; P:response to salt stress; P:meristem maintenance; P:protein homooligomerization; P:pollen germination; P:radial axis specification; P:embryonic meristem development; C:plasma membrane; P:response to water deprivation; P:longitudinal axis specification; C:peroxisome; P:response to cold; F:signal transducer, downstream of receptor, with serine/threonine kinase activity; P:absc…	EC:2.7.11	Transferring phosphorus-containing groups
CotAD_15853	Leucine-rich receptor kinase family	944	20	0	61.95	17	P:GO:1902025; P:GO:0010051; P:GO:0007169; P:GO:0046777; P:GO:0009960; F:GO:0004674; P:GO:0009845; C:GO:0005886; F:GO:0005524; P:GO:0006979; P:GO:0045490; F:GO:0005515; P:GO:0010468; F:GO:0017046; P:GO:0010227; P:GO:0090548; P:GO:0010102	P:nitrate import; P:xylem and phloem pattern formation; P:transmembrane receptor protein tyrosine kinase signaling pathway; P:protein autophosphorylation; P:endosperm development; F:protein serine/threonine kinase activity; P:seed germination; C:plasma membrane; F:ATP binding; P:response to oxidative stress; P:pectin catabolic process; F:protein binding; P:regulation of gene expression; F:peptide…	EC:2.7.11	Transferring phosphorus-containing groups
CotAD_16150	Leucine-rich repeat kinase family	624	20	0	77.1	20	P:GO:0010152; F:GO:0042802; P:GO:0009793; P:GO:0007030; P:GO:0010150; P:GO:0009556; P:GO:0007169; P:GO:0009742; P:GO:0046777; C:GO:0043234; C:GO:0005576; C:GO:0005886; F:GO:0004675; F:GO:0005524; F:GO:0004713; C:GO:0016021; P:GO:0016032; P:GO:0051607; P:GO:0010227; F:GO:0033612	P:pollen maturation; F:identical protein binding; P:embryo development ending in seed dormancy; P:Golgi organization; P:leaf senescence; P:microsporogenesis; P:transmembrane receptor protein tyrosine kinase signaling pathway; P:brassinosteroid mediated signaling pathway; P:protein autophosphorylation; C:protein complex; C:extracellular region; C:plasma membrane; F:transmembrane receptor protein s…	EC:2.7.10; EC:2.7.11	Transferring phosphorus-containing groups; Transferring phosphorus-containing groups
CotAD_16694	Leucine-rich receptor kinase family	1027	20	0	65.7	9	F:GO:0005524; F:GO:0005515; P:GO:0010082; P:GO:0010449; C:GO:0016021; P:GO:0007169; F:GO:0004674; P:GO:0006468; C:GO:0005886	F:ATP binding; F:protein binding; P:regulation of root meristem growth; P:root meristem growth; C:integral component of membrane; P:transmembrane receptor protein tyrosine kinase signaling pathway; F:protein serine/threonine kinase activity; P:protein phosphorylation; C:plasma membrane	EC:2.7.11	Transferring phosphorus-containing groups
CotAD_16707	Leucine-rich receptor kinase family	977	20	0	59.3	23	P:GO:0007172; P:GO:1902025; P:GO:0010051; P:GO:0007169; P:GO:0046777; C:GO:0000325; P:GO:0009960; F:GO:0004674; P:GO:0009934; F:GO:0043621; P:GO:0009845; C:GO:0005886; F:GO:0005524; P:GO:0006979; P:GO:0045490; C:GO:0009506; P:GO:0010468; P:GO:0030154; F:GO:0017046; P:GO:0010227; F:GO:0033612; P:GO:0090548; P:GO:0010102	P:signal complex assembly; P:nitrate import; P:xylem and phloem pattern formation; P:transmembrane receptor protein tyrosine kinase signaling pathway; P:protein autophosphorylation; C:plant-type vacuole; P:endosperm development; F:protein serine/threonine kinase activity; P:regulation of meristem structural organization; F:protein self-association; P:seed germination; C:plasma membrane; F:ATP bin…	EC:2.7.11	Transferring phosphorus-containing groups
CotAD_16847	receptor kinase	1013	20	0	53.05	11	P:GO:0009617; C:GO:0005768; P:GO:0051179; P:GO:0048856; P:GO:0051716; F:GO:0005488; P:GO:0006952; F:GO:0016301; P:GO:0044699; P:GO:0050789; C:GO:0005886	P:response to bacterium; C:endosome; P:localization; P:anatomical structure development; P:cellular response to stimulus; F:binding; P:defense response; F:kinase activity; P:single-organism process; P:regulation of biological process; C:plasma membrane
CotAD_16886	leucine-rich repeat receptor	1052	20	0	60.65	22	F:GO:0042802; P:GO:0009611; F:GO:0004383; P:GO:0007169; P:GO:0048646; F:GO:0046983; P:GO:0009741; P:GO:0045851; F:GO:0004674; P:GO:0006468; P:GO:0048827; C:GO:0005886; F:GO:0001653; F:GO:0005524; C:GO:0009507; P:GO:0009826; C:GO:0005768; F:GO:0004888; P:GO:0045087; C:GO:0016021; P:GO:0031347; P:GO:0048580	F:identical protein binding; P:response to wounding; F:guanylate cyclase activity; P:transmembrane receptor protein tyrosine kinase signaling pathway; P:anatomical structure formation involved in morphogenesis; F:protein dimerization activity; P:response to brassinosteroid; P:pH reduction; F:protein serine/threonine kinase activity; P:protein phosphorylation; P:phyllome development; C:plasma memb…	EC:2.7.11; EC:4.6.1.2	Transferring phosphorus-containing groups; Guanylate cyclase
CotAD_17108	Leucine-rich repeat kinase family	906	20	0	59.2	9	C:GO:0009507; C:GO:0009506; P:GO:0007165; P:GO:0009555; C:GO:0005794; C:GO:0009505; F:GO:0005488; C:GO:0005886; F:GO:0004675	C:chloroplast; C:plasmodesma; P:signal transduction; P:pollen development; C:Golgi apparatus; C:plant-type cell wall; F:binding; C:plasma membrane; F:transmembrane receptor protein serine/threonine kinase activity	EC:2.7.11	Transferring phosphorus-containing groups
CotAD_17196	leucine-rich repeat receptor	734	20	0	56.65	6	C:GO:0005634; C:GO:0005829; P:GO:0007166; P:GO:0016310; F:GO:0004674; C:GO:0005886	C:nucleus; C:cytosol; P:cell surface receptor signaling pathway; P:phosphorylation; F:protein serine/threonine kinase activity; C:plasma membrane	EC:2.7.11	Transferring phosphorus-containing groups
CotAD_17222	receptor kinase	886	20	0	52.7	16	P:GO:0048608; P:GO:0009791; C:GO:0044464; F:GO:0004672; F:GO:0042277; P:GO:0009653; P:GO:0044763; C:GO:0005576; P:GO:0006468; P:GO:0009888; P:GO:0044702; P:GO:0009605; P:GO:0048367; P:GO:0099402; C:GO:0016020; P:GO:0050789	P:reproductive structure development; P:post-embryonic development; C:cell part; F:protein kinase activity; F:peptide binding; P:anatomical structure morphogenesis; P:single-organism cellular process; C:extracellular region; P:protein phosphorylation; P:tissue development; P:single organism reproductive process; P:response to external stimulus; P:shoot system development; P:plant organ developmen…
CotAD_17389	Leucine-rich repeat kinase family	609	20	2.03e-146	63.95	11	F:GO:0005524; C:GO:0009507; F:GO:0005515; P:GO:0010183; C:GO:0012505; P:GO:0007169; P:GO:0048765; P:GO:0006468; C:GO:0005886; C:GO:0090406; F:GO:0004675	F:ATP binding; C:chloroplast; F:protein binding; P:pollen tube guidance; C:endomembrane system; P:transmembrane receptor protein tyrosine kinase signaling pathway; P:root hair cell differentiation; P:protein phosphorylation; C:plasma membrane; C:pollen tube; F:transmembrane receptor protein serine/threonine kinase activity	EC:2.7.11	Transferring phosphorus-containing groups
CotAD_17481	Leucine-rich receptor kinase family	1033	20	0	63.9	21	P:GO:0010075; P:GO:0007172; P:GO:0010183; P:GO:0046777; P:GO:0048437; C:GO:0000325; F:GO:0004674; P:GO:0009934; F:GO:0043621; C:GO:0005886; P:GO:0051301; F:GO:0005524; C:GO:0009506; P:GO:0001944; C:GO:0016021; P:GO:0030154; P:GO:0010067; P:GO:0010089; F:GO:0033612; C:GO:0090406; P:GO:0010223	P:regulation of meristem growth; P:signal complex assembly; P:pollen tube guidance; P:protein autophosphorylation; P:floral organ development; C:plant-type vacuole; F:protein serine/threonine kinase activity; P:regulation of meristem structural organization; F:protein self-association; C:plasma membrane; P:cell division; F:ATP binding; C:plasmodesma; P:vasculature development; C:integral componen…	EC:2.7.11	Transferring phosphorus-containing groups
CotAD_17672	Leucine-rich repeat kinase family	575	20	0	64.95	13	P:GO:0007169; P:GO:0009610; C:GO:0005774; C:GO:0009505; F:GO:0004674; P:GO:0006468; P:GO:0009834; C:GO:0046658; F:GO:0005524; C:GO:0009506; P:GO:0009737; P:GO:2000605; C:GO:0016021	P:transmembrane receptor protein tyrosine kinase signaling pathway; P:response to symbiotic fungus; C:vacuolar membrane; C:plant-type cell wall; F:protein serine/threonine kinase activity; P:protein phosphorylation; P:plant-type secondary cell wall biogenesis; C:anchored component of plasma membrane; F:ATP binding; C:plasmodesma; P:response to abscisic acid; P:positive regulation of secondary gro…	EC:2.7.11	Transferring phosphorus-containing groups
CotAD_17827	Leucine-rich repeat kinase family	621	20	4.09e-108	51	5	C:GO:0043231; C:GO:0016020; C:GO:0044444; P:GO:0009987; C:GO:0071944	C:intracellular membrane-bounded organelle; C:membrane; C:cytoplasmic part; P:cellular process; C:cell periphery
CotAD_18195	receptor kinase	1280	20	0	54.9	10	C:GO:0009507; F:GO:0005515; F:GO:0097159; F:GO:0019199; P:GO:0010051; C:GO:0016020; P:GO:0009556; F:GO:0004674; P:GO:0009755; P:GO:0010234	C:chloroplast; F:protein binding; F:organic cyclic compound binding; F:transmembrane receptor protein kinase activity; P:xylem and phloem pattern formation; C:membrane; P:microsporogenesis; F:protein serine/threonine kinase activity; P:hormone-mediated signaling pathway; P:anther wall tapetum cell fate specification	EC:2.7.11	Transferring phosphorus-containing groups
CotAD_18413	Leucine-rich repeat kinase family	674	20	0	61.05	11	F:GO:0005524; C:GO:0009506; P:GO:2000605; C:GO:0016021; P:GO:0007169; C:GO:0005774; C:GO:0009505; F:GO:0004674; P:GO:0006468; P:GO:0009834; C:GO:0005886	F:ATP binding; C:plasmodesma; P:positive regulation of secondary growth; C:integral component of membrane; P:transmembrane receptor protein tyrosine kinase signaling pathway; C:vacuolar membrane; C:plant-type cell wall; F:protein serine/threonine kinase activity; P:protein phosphorylation; P:plant-type secondary cell wall biogenesis; C:plasma membrane	EC:2.7.11	Transferring phosphorus-containing groups
CotAD_18696	Leucine-rich receptor kinase family	1015	20	0	59.1	20	P:GO:0007172; P:GO:0046777; C:GO:0000325; F:GO:0004674; P:GO:0009934; F:GO:0043621; C:GO:0005886; P:GO:0051301; P:GO:0045490; C:GO:0009506; P:GO:0001944; P:GO:0010468; P:GO:0030154; P:GO:0010227; P:GO:0010067; P:GO:0010089; F:GO:0033612; P:GO:0050896; P:GO:0010102; P:GO:0010223	P:signal complex assembly; P:protein autophosphorylation; C:plant-type vacuole; F:protein serine/threonine kinase activity; P:regulation of meristem structural organization; F:protein self-association; C:plasma membrane; P:cell division; P:pectin catabolic process; C:plasmodesma; P:vasculature development; P:regulation of gene expression; P:cell differentiation; P:floral organ abscission; P:proca…	EC:2.7.11	Transferring phosphorus-containing groups
CotAD_18752	receptor kinase	889	20	0	69.75	11	F:GO:0005524; P:GO:0009793; C:GO:0016021; P:GO:0009553; C:GO:0005576; F:GO:0004674; P:GO:0006468; P:GO:0048481; P:GO:0050789; C:GO:0005886; P:GO:0010103	F:ATP binding; P:embryo development ending in seed dormancy; C:integral component of membrane; P:embryo sac development; C:extracellular region; F:protein serine/threonine kinase activity; P:protein phosphorylation; P:plant ovule development; P:regulation of biological process; C:plasma membrane; P:stomatal complex morphogenesis	EC:2.7.11	Transferring phosphorus-containing groups
CotAD_18790	Leucine-rich repeat kinase family	878	20	1.56e-168	66.9	27	P:GO:0010183; P:GO:0009637; C:GO:0009535; P:GO:0009409; C:GO:0009506; P:GO:0010218; P:GO:0018298; P:GO:0016310; P:GO:0010114; C:GO:0090404; F:GO:0042802; P:GO:0009860; C:GO:0009782; C:GO:0009941; P:GO:0009644; F:GO:0004674; P:GO:0009846; P:GO:0009768; P:GO:0009645; F:GO:0046872; F:GO:0031409; C:GO:0016021; C:GO:0030076; F:GO:0016168; C:GO:0010287; C:GO:0016324; P:GO:0080092	P:pollen tube guidance; P:response to blue light; C:chloroplast thylakoid membrane; P:response to cold; C:plasmodesma; P:response to far red light; P:protein-chromophore linkage; P:phosphorylation; P:response to red light; C:pollen tube tip; F:identical protein binding; P:pollen tube growth; C:photosystem I antenna complex; C:chloroplast envelope; P:response to high light intensity; F:protein ser…	EC:2.7.11	Transferring phosphorus-containing groups
CotAD_18948	Leucine-rich repeat kinase family	977	20	0	68.35	7	F:GO:0005524; C:GO:0009507; P:GO:0007169; C:GO:0005576; F:GO:0004674; P:GO:0006468; C:GO:0005886	F:ATP binding; C:chloroplast; P:transmembrane receptor protein tyrosine kinase signaling pathway; C:extracellular region; F:protein serine/threonine kinase activity; P:protein phosphorylation; C:plasma membrane	EC:2.7.11	Transferring phosphorus-containing groups
CotAD_18985	Leucine-rich repeat kinase family	631	20	1.53e-143	56.55	10	P:GO:0002764; C:GO:0009507; F:GO:0005515; P:GO:0010204; P:GO:0048856; F:GO:0004672; P:GO:0016045; P:GO:0010359; P:GO:0009626; C:GO:0005886	P:immune response-regulating signaling pathway; C:chloroplast; F:protein binding; P:defense response signaling pathway, resistance gene-independent; P:anatomical structure development; F:protein kinase activity; P:detection of bacterium; P:regulation of anion channel activity; P:plant-type hypersensitive response; C:plasma membrane
CotAD_19668	Leucine-rich repeat kinase family	606	20	0	75.5	26	P:GO:0009793; P:GO:0007030; P:GO:0009556; P:GO:0046777; P:GO:0060548; F:GO:0005524; C:GO:0005768; P:GO:0008219; F:GO:0046982; P:GO:0050832; F:GO:0033612; P:GO:0010152; F:GO:0042802; P:GO:1900140; P:GO:0010150; P:GO:0007169; P:GO:0009742; C:GO:0043234; P:GO:0042742; C:GO:0005886; F:GO:0004675; P:GO:0002229; C:GO:0016021; P:GO:0010227; P:GO:0010200; P:GO:0016049	P:embryo development ending in seed dormancy; P:Golgi organization; P:microsporogenesis; P:protein autophosphorylation; P:negative regulation of cell death; F:ATP binding; C:endosome; P:cell death; F:protein heterodimerization activity; P:defense response to fungus; F:receptor serine/threonine kinase binding; P:pollen maturation; F:identical protein binding; P:regulation of seedling development; …	EC:2.7.11	Transferring phosphorus-containing groups
CotAD_19718	leucine-rich repeat receptor	975	20	0	58.95	10	F:GO:0005524; P:GO:0003006; F:GO:0005515; P:GO:0048731; P:GO:0009791; C:GO:0016021; P:GO:0007169; F:GO:0004674; P:GO:0006468; C:GO:0005886	F:ATP binding; P:developmental process involved in reproduction; F:protein binding; P:system development; P:post-embryonic development; C:integral component of membrane; P:transmembrane receptor protein tyrosine kinase signaling pathway; F:protein serine/threonine kinase activity; P:protein phosphorylation; C:plasma membrane	EC:2.7.11	Transferring phosphorus-containing groups
CotAD_19795	Leucine-rich repeat kinase family	629	20	0	59.35	8	F:GO:0005524; F:GO:0005515; P:GO:0010183; P:GO:0007169; F:GO:0004674; P:GO:0006468; C:GO:0005886; C:GO:0090406	F:ATP binding; F:protein binding; P:pollen tube guidance; P:transmembrane receptor protein tyrosine kinase signaling pathway; F:protein serine/threonine kinase activity; P:protein phosphorylation; C:plasma membrane; C:pollen tube	EC:2.7.11	Transferring phosphorus-containing groups
CotAD_19962	receptor kinase	727	20	9.33e-121	50.9	9	P:GO:0090558; P:GO:0048608; P:GO:0048367; C:GO:0016020; P:GO:0009791; C:GO:0044464; F:GO:0005488; P:GO:0044702; P:GO:0050896	P:plant epidermis development; P:reproductive structure development; P:shoot system development; C:membrane; P:post-embryonic development; C:cell part; F:binding; P:single organism reproductive process; P:response to stimulus
CotAD_19964	receptor kinase	920	20	4.43e-179	52.65	13	P:GO:0090558; P:GO:0048608; P:GO:0010183; P:GO:0009791; P:GO:0009653; C:GO:0005886; P:GO:0044702; C:GO:0009506; F:GO:0005515; P:GO:0048367; P:GO:0099402; P:GO:0050789; C:GO:0090406	P:plant epidermis development; P:reproductive structure development; P:pollen tube guidance; P:post-embryonic development; P:anatomical structure morphogenesis; C:plasma membrane; P:single organism reproductive process; C:plasmodesma; F:protein binding; P:shoot system development; P:plant organ development; P:regulation of biological process; C:pollen tube
CotAD_20003	receptor kinase	944	20	0	52.3	7	P:GO:0009791; F:GO:0004672; F:GO:0005488; P:GO:0006468; P:GO:0050789; C:GO:0005886; P:GO:0010015	P:post-embryonic development; F:protein kinase activity; F:binding; P:protein phosphorylation; P:regulation of biological process; C:plasma membrane; P:root morphogenesis
CotAD_20150	Leucine-rich repeat kinase family	639	20	0	65.1	12	F:GO:0005524; C:GO:0009506; F:GO:0005515; P:GO:0009860; C:GO:0016021; P:GO:0007169; F:GO:0004674; P:GO:0006468; P:GO:0009846; C:GO:0016324; C:GO:0090406; P:GO:0080092	F:ATP binding; C:plasmodesma; F:protein binding; P:pollen tube growth; C:integral component of membrane; P:transmembrane receptor protein tyrosine kinase signaling pathway; F:protein serine/threonine kinase activity; P:protein phosphorylation; P:pollen germination; C:apical plasma membrane; C:pollen tube; P:regulation of pollen tube growth	EC:2.7.11	Transferring phosphorus-containing groups
CotAD_20164	leucine-rich repeat receptor	966	20	0	59.15	9	F:GO:0005524; P:GO:0003006; F:GO:0005515; P:GO:0048731; C:GO:0016021; P:GO:0007169; F:GO:0004674; P:GO:0006468; C:GO:0005886	F:ATP binding; P:developmental process involved in reproduction; F:protein binding; P:system development; C:integral component of membrane; P:transmembrane receptor protein tyrosine kinase signaling pathway; F:protein serine/threonine kinase activity; P:protein phosphorylation; C:plasma membrane	EC:2.7.11	Transferring phosphorus-containing groups
CotAD_20224	Leucine-rich repeat transmembrane kinase	936	20	0	71.5	5	F:GO:0005524; C:GO:0009506; F:GO:0004672; P:GO:0016310; C:GO:0005886	F:ATP binding; C:plasmodesma; F:protein kinase activity; P:phosphorylation; C:plasma membrane
CotAD_20247	Leucine-rich repeat kinase family	713	20	0	62.4	9	F:GO:0005515; P:GO:0010183; C:GO:0012505; P:GO:0007166; P:GO:0016310; P:GO:0048765; F:GO:0004674; C:GO:0005886; C:GO:0090406	F:protein binding; P:pollen tube guidance; C:endomembrane system; P:cell surface receptor signaling pathway; P:phosphorylation; P:root hair cell differentiation; F:protein serine/threonine kinase activity; C:plasma membrane; C:pollen tube	EC:2.7.11	Transferring phosphorus-containing groups
CotAD_20384	Leucine-rich repeat kinase family	659	20	0	60.2	11	F:GO:0005524; F:GO:0005515; P:GO:0010183; C:GO:0016021; P:GO:0007169; P:GO:0009653; F:GO:0004674; P:GO:0006468; C:GO:0005886; P:GO:0048869; C:GO:0090406	F:ATP binding; F:protein binding; P:pollen tube guidance; C:integral component of membrane; P:transmembrane receptor protein tyrosine kinase signaling pathway; P:anatomical structure morphogenesis; F:protein serine/threonine kinase activity; P:protein phosphorylation; C:plasma membrane; P:cellular developmental process; C:pollen tube	EC:2.7.11	Transferring phosphorus-containing groups
CotAD_20501	leucine-rich repeat receptor	740	20	0	58.5	8	C:GO:0005634; F:GO:0005524; C:GO:0005829; P:GO:0007169; C:GO:0005576; P:GO:0006468; C:GO:0005886; F:GO:0004675	C:nucleus; F:ATP binding; C:cytosol; P:transmembrane receptor protein tyrosine kinase signaling pathway; C:extracellular region; P:protein phosphorylation; C:plasma membrane; F:transmembrane receptor protein serine/threonine kinase activity	EC:2.7.11	Transferring phosphorus-containing groups
CotAD_20525	Leucine-rich receptor kinase family	865	20	0	52.5	11	P:GO:0048608; P:GO:0099402; C:GO:0016020; P:GO:0009791; F:GO:0004672; F:GO:0042277; C:GO:0005576; P:GO:0006468; P:GO:0050789; P:GO:0044702; P:GO:0050896	P:reproductive structure development; P:plant organ development; C:membrane; P:post-embryonic development; F:protein kinase activity; F:peptide binding; C:extracellular region; P:protein phosphorylation; P:regulation of biological process; P:single organism reproductive process; P:response to stimulus
CotAD_20545	Leucine-rich repeat kinase family	885	20	0	57.4	10	P:GO:0048364; F:GO:0005524; F:GO:0004714; C:GO:0016021; P:GO:0007169; P:GO:0009653; F:GO:0004674; P:GO:0006468; P:GO:0048507; C:GO:0005886	P:root development; F:ATP binding; F:transmembrane receptor protein tyrosine kinase activity; C:integral component of membrane; P:transmembrane receptor protein tyrosine kinase signaling pathway; P:anatomical structure morphogenesis; F:protein serine/threonine kinase activity; P:protein phosphorylation; P:meristem development; C:plasma membrane	EC:2.7.10; EC:2.7.10.1; EC:2.7.11	Transferring phosphorus-containing groups; Receptor protein-tyrosine kinase; Transferring phosphorus-containing groups
CotAD_20548	Leucine-rich repeat kinase family	885	20	0	57.35	10	P:GO:0048364; F:GO:0005524; F:GO:0004714; C:GO:0016021; P:GO:0007169; P:GO:0009653; F:GO:0004674; P:GO:0006468; P:GO:0048507; C:GO:0005886	P:root development; F:ATP binding; F:transmembrane receptor protein tyrosine kinase activity; C:integral component of membrane; P:transmembrane receptor protein tyrosine kinase signaling pathway; P:anatomical structure morphogenesis; F:protein serine/threonine kinase activity; P:protein phosphorylation; P:meristem development; C:plasma membrane	EC:2.7.10; EC:2.7.10.1; EC:2.7.11	Transferring phosphorus-containing groups; Receptor protein-tyrosine kinase; Transferring phosphorus-containing groups
CotAD_20689	Leucine-rich receptor kinase family	774	20	0	63.2	10	F:GO:0005524; F:GO:0005515; P:GO:0010082; P:GO:0010449; C:GO:0016021; P:GO:0007169; C:GO:0005576; F:GO:0004674; P:GO:0006468; C:GO:0005886	F:ATP binding; F:protein binding; P:regulation of root meristem growth; P:root meristem growth; C:integral component of membrane; P:transmembrane receptor protein tyrosine kinase signaling pathway; C:extracellular region; F:protein serine/threonine kinase activity; P:protein phosphorylation; C:plasma membrane	EC:2.7.11	Transferring phosphorus-containing groups
CotAD_20733	receptor kinase	606	20	0	67.1	31	P:GO:1900150; P:GO:0009556; P:GO:0060548; F:GO:0005496; C:GO:0005576; P:GO:0006468; P:GO:0009911; P:GO:0009729; F:GO:0005524; C:GO:0009507; P:GO:0009826; C:GO:0005768; C:GO:0009506; F:GO:0046982; P:GO:0048366; F:GO:0033612; P:GO:0010234; P:GO:1900140; F:GO:0042803; P:GO:0007169; P:GO:0009742; C:GO:0043234; F:GO:0004674; P:GO:1900425; P:GO:0042742; C:GO:0005886; C:GO:0005634; C:GO:0016021; P:GO:00…	P:regulation of defense response to fungus; P:microsporogenesis; P:negative regulation of cell death; F:steroid binding; C:extracellular region; P:protein phosphorylation; P:positive regulation of flower development; P:detection of brassinosteroid stimulus; F:ATP binding; C:chloroplast; P:unidimensional cell growth; C:endosome; C:plasmodesma; F:protein heterodimerization activity; P:leaf developm…	EC:2.7.11	Transferring phosphorus-containing groups
CotAD_21149	receptor kinase	1051	20	0	59.6	17	P:GO:0007275; P:GO:0009611; F:GO:0004383; P:GO:0007169; P:GO:0045851; F:GO:0004674; P:GO:0006468; C:GO:0005886; F:GO:0001653; F:GO:0005524; C:GO:0009507; P:GO:0009826; F:GO:0004888; F:GO:0005515; P:GO:0045087; C:GO:0016021; P:GO:0031347	P:multicellular organism development; P:response to wounding; F:guanylate cyclase activity; P:transmembrane receptor protein tyrosine kinase signaling pathway; P:pH reduction; F:protein serine/threonine kinase activity; P:protein phosphorylation; C:plasma membrane; F:peptide receptor activity; F:ATP binding; C:chloroplast; P:unidimensional cell growth; F:transmembrane signaling receptor activity;…	EC:2.7.11; EC:4.6.1.2	Transferring phosphorus-containing groups; Guanylate cyclase
CotAD_21607	Leucine-rich repeat transmembrane kinase	951	20	0	70.4	9	F:GO:0005524; C:GO:0009506; F:GO:0005515; P:GO:0045088; P:GO:0007169; P:GO:0009861; F:GO:0004674; P:GO:0006468; C:GO:0005886	F:ATP binding; C:plasmodesma; F:protein binding; P:regulation of innate immune response; P:transmembrane receptor protein tyrosine kinase signaling pathway; P:jasmonic acid and ethylene-dependent systemic resistance; F:protein serine/threonine kinase activity; P:protein phosphorylation; C:plasma membrane	EC:2.7.11	Transferring phosphorus-containing groups
CotAD_21656	Leucine-rich repeat kinase family	716	20	0	59.15	11	C:GO:0009570; F:GO:0005524; F:GO:0005515; C:GO:0016021; P:GO:0007169; P:GO:0046777; C:GO:0009505; F:GO:0004674; C:GO:0005886; C:GO:0090406; P:GO:0010069	C:chloroplast stroma; F:ATP binding; F:protein binding; C:integral component of membrane; P:transmembrane receptor protein tyrosine kinase signaling pathway; P:protein autophosphorylation; C:plant-type cell wall; F:protein serine/threonine kinase activity; C:plasma membrane; C:pollen tube; P:zygote asymmetric cytokinesis in embryo sac	EC:2.7.11	Transferring phosphorus-containing groups
CotAD_21762	Leucine-rich repeat kinase family	640	20	0	55.2	6	F:GO:0005524; C:GO:0016021; P:GO:0007169; F:GO:0004674; P:GO:0006468; C:GO:0005886	F:ATP binding; C:integral component of membrane; P:transmembrane receptor protein tyrosine kinase signaling pathway; F:protein serine/threonine kinase activity; P:protein phosphorylation; C:plasma membrane	EC:2.7.11	Transferring phosphorus-containing groups
CotAD_21823	Leucine-rich repeat kinase family	518	20	1.56e-157	62.25	10	P:GO:0002764; C:GO:0009507; F:GO:0005515; F:GO:0019199; P:GO:0010204; P:GO:0016045; P:GO:0010359; P:GO:0016310; P:GO:0009626; C:GO:0005886	P:immune response-regulating signaling pathway; C:chloroplast; F:protein binding; F:transmembrane receptor protein kinase activity; P:defense response signaling pathway, resistance gene-independent; P:detection of bacterium; P:regulation of anion channel activity; P:phosphorylation; P:plant-type hypersensitive response; C:plasma membrane	EC:2.7.11	Transferring phosphorus-containing groups
CotAD_21855	Leucine-rich repeat kinase family	530	20	8.76e-170	63.95	5	C:GO:0009506; F:GO:0004672; P:GO:0016310; P:GO:0042742; C:GO:0005886	C:plasmodesma; F:protein kinase activity; P:phosphorylation; P:defense response to bacterium; C:plasma membrane
CotAD_21953	Leucine-rich repeat kinase family	640	20	1.22e-174	57.4	13	C:GO:0090404; F:GO:0042802; P:GO:0009860; P:GO:0010183; F:GO:0004674; P:GO:0009846; C:GO:0009506; C:GO:0005737; C:GO:0005618; P:GO:0016310; C:GO:0016324; C:GO:0031224; P:GO:0080092	C:pollen tube tip; F:identical protein binding; P:pollen tube growth; P:pollen tube guidance; F:protein serine/threonine kinase activity; P:pollen germination; C:plasmodesma; C:cytoplasm; C:cell wall; P:phosphorylation; C:apical plasma membrane; C:intrinsic component of membrane; P:regulation of pollen tube growth	EC:2.7.11	Transferring phosphorus-containing groups
CotAD_22086	Leucine-rich repeat kinase family	1026	20	0	57.2	11	P:GO:0002764; C:GO:0009507; C:GO:0005768; F:GO:0005515; P:GO:0051179; F:GO:0019199; P:GO:0010204; P:GO:0016045; P:GO:0010359; P:GO:0009626; C:GO:0005886	P:immune response-regulating signaling pathway; C:chloroplast; C:endosome; F:protein binding; P:localization; F:transmembrane receptor protein kinase activity; P:defense response signaling pathway, resistance gene-independent; P:detection of bacterium; P:regulation of anion channel activity; P:plant-type hypersensitive response; C:plasma membrane	EC:2.7.11	Transferring phosphorus-containing groups
CotAD_22088	Leucine-rich repeat kinase family	1035	20	0	58.3	13	F:GO:0004674; P:GO:0009626; C:GO:0005886; P:GO:0002764; C:GO:0009507; C:GO:0005768; F:GO:0005515; P:GO:0051179; F:GO:0019199; P:GO:0010204; P:GO:0016045; P:GO:0010359; P:GO:0016310	F:protein serine/threonine kinase activity; P:plant-type hypersensitive response; C:plasma membrane; P:immune response-regulating signaling pathway; C:chloroplast; C:endosome; F:protein binding; P:localization; F:transmembrane receptor protein kinase activity; P:defense response signaling pathway, resistance gene-independent; P:detection of bacterium; P:regulation of anion channel activity; P:pho…	EC:2.7.11	Transferring phosphorus-containing groups
CotAD_22235	Leucine-rich repeat kinase family	959	20	0	65.35	7	F:GO:0005524; P:GO:0007169; C:GO:0005576; F:GO:0004674; P:GO:0006468; C:GO:0005773; C:GO:0005886	F:ATP binding; P:transmembrane receptor protein tyrosine kinase signaling pathway; C:extracellular region; F:protein serine/threonine kinase activity; P:protein phosphorylation; C:vacuole; C:plasma membrane	EC:2.7.11	Transferring phosphorus-containing groups
CotAD_22290	Leucine-rich repeat kinase family	1539	20	0	63	17	P:GO:0019538; F:GO:0043168; C:GO:0009505; P:GO:0009626; C:GO:0005886; F:GO:0004566; P:GO:0002764; C:GO:0009507; P:GO:0009826; F:GO:0005515; P:GO:0044260; F:GO:0097367; F:GO:0019199; P:GO:0010204; P:GO:0016045; P:GO:0010359; P:GO:0016310	P:protein metabolic process; F:anion binding; C:plant-type cell wall; P:plant-type hypersensitive response; C:plasma membrane; F:beta-glucuronidase activity; P:immune response-regulating signaling pathway; C:chloroplast; P:unidimensional cell growth; F:protein binding; P:cellular macromolecule metabolic process; F:carbohydrate derivative binding; F:transmembrane receptor protein kinase activity; …	EC:2.7.11; EC:3.2.1.31	Transferring phosphorus-containing groups; Beta-glucuronidase
CotAD_22291	Leucine-rich repeat kinase family	828	20	0	57.3	9	P:GO:0002764; C:GO:0009507; F:GO:0005515; P:GO:0010204; F:GO:0004672; P:GO:0016045; P:GO:0010359; P:GO:0009626; C:GO:0005886	P:immune response-regulating signaling pathway; C:chloroplast; F:protein binding; P:defense response signaling pathway, resistance gene-independent; F:protein kinase activity; P:detection of bacterium; P:regulation of anion channel activity; P:plant-type hypersensitive response; C:plasma membrane
CotAD_22292	Leucine-rich repeat kinase family	626	20	3.71e-132	52.7	11	P:GO:0009617; C:GO:0005768; P:GO:0051179; P:GO:0007165; P:GO:0033554; F:GO:0004672; F:GO:0005488; P:GO:0006952; C:GO:0005886; P:GO:0002376; P:GO:0050776	P:response to bacterium; C:endosome; P:localization; P:signal transduction; P:cellular response to stress; F:protein kinase activity; F:binding; P:defense response; C:plasma membrane; P:immune system process; P:regulation of immune response
CotAD_22294	Leucine-rich repeat kinase family	1031	20	0	59.15	10	P:GO:0002764; C:GO:0009507; F:GO:0005515; F:GO:0019199; P:GO:0010204; P:GO:0016045; P:GO:0010359; P:GO:0016310; P:GO:0009626; C:GO:0005886	P:immune response-regulating signaling pathway; C:chloroplast; F:protein binding; F:transmembrane receptor protein kinase activity; P:defense response signaling pathway, resistance gene-independent; P:detection of bacterium; P:regulation of anion channel activity; P:phosphorylation; P:plant-type hypersensitive response; C:plasma membrane	EC:2.7.11	Transferring phosphorus-containing groups
CotAD_22295	Leucine-rich repeat kinase family	788	20	0	58.6	14	P:GO:0007275; F:GO:0004672; P:GO:0009626; C:GO:0005886; P:GO:0044702; P:GO:0048869; P:GO:0002764; P:GO:0003006; C:GO:0009507; F:GO:0005515; P:GO:0010204; P:GO:0016045; P:GO:0010359; P:GO:0016310	P:multicellular organism development; F:protein kinase activity; P:plant-type hypersensitive response; C:plasma membrane; P:single organism reproductive process; P:cellular developmental process; P:immune response-regulating signaling pathway; P:developmental process involved in reproduction; C:chloroplast; F:protein binding; P:defense response signaling pathway, resistance gene-independent; P:de…
CotAD_22296	Leucine-rich repeat kinase family	1034	20	0	58.35	13	F:GO:0004674; P:GO:0009626; C:GO:0005886; P:GO:0002764; C:GO:0009507; C:GO:0005768; F:GO:0005515; P:GO:0051179; F:GO:0019199; P:GO:0010204; P:GO:0016045; P:GO:0010359; P:GO:0016310	F:protein serine/threonine kinase activity; P:plant-type hypersensitive response; C:plasma membrane; P:immune response-regulating signaling pathway; C:chloroplast; C:endosome; F:protein binding; P:localization; F:transmembrane receptor protein kinase activity; P:defense response signaling pathway, resistance gene-independent; P:detection of bacterium; P:regulation of anion channel activity; P:pho…	EC:2.7.11	Transferring phosphorus-containing groups
CotAD_22299	Leucine-rich repeat kinase family	1033	20	0	58.4	13	F:GO:0004674; P:GO:0009626; C:GO:0005886; P:GO:0002764; C:GO:0009507; C:GO:0005768; F:GO:0005515; P:GO:0051179; F:GO:0019199; P:GO:0010204; P:GO:0016045; P:GO:0010359; P:GO:0016310	F:protein serine/threonine kinase activity; P:plant-type hypersensitive response; C:plasma membrane; P:immune response-regulating signaling pathway; C:chloroplast; C:endosome; F:protein binding; P:localization; F:transmembrane receptor protein kinase activity; P:defense response signaling pathway, resistance gene-independent; P:detection of bacterium; P:regulation of anion channel activity; P:pho…	EC:2.7.11	Transferring phosphorus-containing groups
CotAD_22301	Leucine-rich repeat kinase family	1041	20	0	58.65	10	P:GO:0002764; C:GO:0009507; F:GO:0005515; F:GO:0019199; P:GO:0010204; P:GO:0016045; P:GO:0010359; P:GO:0016310; P:GO:0009626; C:GO:0005886	P:immune response-regulating signaling pathway; C:chloroplast; F:protein binding; F:transmembrane receptor protein kinase activity; P:defense response signaling pathway, resistance gene-independent; P:detection of bacterium; P:regulation of anion channel activity; P:phosphorylation; P:plant-type hypersensitive response; C:plasma membrane	EC:2.7.11	Transferring phosphorus-containing groups
CotAD_22302	Leucine-rich repeat kinase family	934	20	0	53.2	6	P:GO:0007165; F:GO:0005488; F:GO:0016301; C:GO:0005886; P:GO:0002376; P:GO:0050776	P:signal transduction; F:binding; F:kinase activity; C:plasma membrane; P:immune system process; P:regulation of immune response
CotAD_22332	Leucine-rich repeat kinase family	715	20	0	60.65	9	F:GO:0005524; C:GO:0009506; C:GO:0043231; P:GO:0007169; C:GO:0044444; C:GO:0009505; F:GO:0004674; P:GO:0006468; C:GO:0005886	F:ATP binding; C:plasmodesma; C:intracellular membrane-bounded organelle; P:transmembrane receptor protein tyrosine kinase signaling pathway; C:cytoplasmic part; C:plant-type cell wall; F:protein serine/threonine kinase activity; P:protein phosphorylation; C:plasma membrane	EC:2.7.11	Transferring phosphorus-containing groups
CotAD_22730	receptor kinase	972	20	7.94e-180	52.85	11	P:GO:0009617; C:GO:0005768; P:GO:0051179; P:GO:0007165; P:GO:0033554; F:GO:0004672; F:GO:0005488; P:GO:0006952; C:GO:0005886; P:GO:0002376; P:GO:0050776	P:response to bacterium; C:endosome; P:localization; P:signal transduction; P:cellular response to stress; F:protein kinase activity; F:binding; P:defense response; C:plasma membrane; P:immune system process; P:regulation of immune response
CotAD_22753	Leucine-rich repeat kinase family	650	20	0	72.1	19	P:GO:0010152; F:GO:0042802; P:GO:0009793; P:GO:0007030; P:GO:0010150; P:GO:0009556; P:GO:0007169; P:GO:0009742; P:GO:0046777; C:GO:0043234; C:GO:0005576; C:GO:0005886; F:GO:0004675; F:GO:0005524; F:GO:0004713; C:GO:0016021; P:GO:0051607; P:GO:0010227; F:GO:0033612	P:pollen maturation; F:identical protein binding; P:embryo development ending in seed dormancy; P:Golgi organization; P:leaf senescence; P:microsporogenesis; P:transmembrane receptor protein tyrosine kinase signaling pathway; P:brassinosteroid mediated signaling pathway; P:protein autophosphorylation; C:protein complex; C:extracellular region; C:plasma membrane; F:transmembrane receptor protein s…	EC:2.7.10; EC:2.7.11	Transferring phosphorus-containing groups; Transferring phosphorus-containing groups
CotAD_22778	Leucine-rich receptor kinase family	1039	20	0	63.45	20	P:GO:0010075; P:GO:0007172; P:GO:0010183; P:GO:0046777; P:GO:0048437; C:GO:0000325; F:GO:0004674; P:GO:0009934; F:GO:0043621; C:GO:0005886; P:GO:0051301; F:GO:0005524; C:GO:0009506; P:GO:0001944; P:GO:0030154; P:GO:0010067; P:GO:0010089; F:GO:0033612; C:GO:0090406; P:GO:0010223	P:regulation of meristem growth; P:signal complex assembly; P:pollen tube guidance; P:protein autophosphorylation; P:floral organ development; C:plant-type vacuole; F:protein serine/threonine kinase activity; P:regulation of meristem structural organization; F:protein self-association; C:plasma membrane; P:cell division; F:ATP binding; C:plasmodesma; P:vasculature development; P:cell differentiat…	EC:2.7.11	Transferring phosphorus-containing groups
CotAD_22931	Leucine-rich receptor kinase family	974	20	0	53.65	16	P:GO:0048509; P:GO:0048608; P:GO:0009791; P:GO:0007169; C:GO:0005783; P:GO:0009653; P:GO:0044763; F:GO:0004674; P:GO:0006468; P:GO:0048507; C:GO:0005886; P:GO:0044702; F:GO:0005524; F:GO:0005515; P:GO:0048367; P:GO:0099402	P:regulation of meristem development; P:reproductive structure development; P:post-embryonic development; P:transmembrane receptor protein tyrosine kinase signaling pathway; C:endoplasmic reticulum; P:anatomical structure morphogenesis; P:single-organism cellular process; F:protein serine/threonine kinase activity; P:protein phosphorylation; P:meristem development; C:plasma membrane; P:single org…	EC:2.7.11	Transferring phosphorus-containing groups
CotAD_22998	Leucine-rich repeat kinase family	535	20	1.12e-81	63.75	16	C:GO:0090404; F:GO:0042802; P:GO:0009860; P:GO:0010183; P:GO:0007169; C:GO:0005576; F:GO:0004674; P:GO:0006468; P:GO:0009846; C:GO:0005886; F:GO:0005524; C:GO:0009507; C:GO:0009506; C:GO:0045177; C:GO:0016021; P:GO:0080092	C:pollen tube tip; F:identical protein binding; P:pollen tube growth; P:pollen tube guidance; P:transmembrane receptor protein tyrosine kinase signaling pathway; C:extracellular region; F:protein serine/threonine kinase activity; P:protein phosphorylation; P:pollen germination; C:plasma membrane; F:ATP binding; C:chloroplast; C:plasmodesma; C:apical part of cell; C:integral component of membrane;…	EC:2.7.11	Transferring phosphorus-containing groups
CotAD_23291	receptor kinase	1052	20	0	52.65	12	P:GO:0052544; C:GO:0005768; F:GO:0005515; P:GO:0007165; F:GO:0004672; P:GO:0016045; P:GO:0010359; P:GO:0006898; P:GO:0042742; C:GO:0005886; P:GO:0002376; P:GO:0050776	P:defense response by callose deposition in cell wall; C:endosome; F:protein binding; P:signal transduction; F:protein kinase activity; P:detection of bacterium; P:regulation of anion channel activity; P:receptor-mediated endocytosis; P:defense response to bacterium; C:plasma membrane; P:immune system process; P:regulation of immune response
CotAD_23361	Leucine-rich repeat kinase family	581	20	0	62.3	16	C:GO:0090404; F:GO:0042802; P:GO:0009860; P:GO:0010183; P:GO:0007169; C:GO:0009505; F:GO:0004674; P:GO:0006468; P:GO:0009846; C:GO:0046658; F:GO:0005524; C:GO:0009506; P:GO:0009737; C:GO:0005737; C:GO:0016324; P:GO:0080092	C:pollen tube tip; F:identical protein binding; P:pollen tube growth; P:pollen tube guidance; P:transmembrane receptor protein tyrosine kinase signaling pathway; C:plant-type cell wall; F:protein serine/threonine kinase activity; P:protein phosphorylation; P:pollen germination; C:anchored component of plasma membrane; F:ATP binding; C:plasmodesma; P:response to abscisic acid; C:cytoplasm; C:apica…	EC:2.7.11	Transferring phosphorus-containing groups
CotAD_23438	Leucine-rich repeat kinase family	643	20	0	72.6	20	P:GO:0010150; P:GO:0009742; P:GO:0007166; C:GO:0043234; C:GO:0005576; P:GO:0006468; P:GO:0042742; C:GO:0005886; F:GO:0004675; F:GO:0005524; F:GO:0004713; C:GO:0005768; P:GO:0008219; F:GO:0046982; P:GO:0002229; C:GO:0016021; P:GO:0051607; P:GO:0050832; F:GO:0033612; P:GO:0016049	P:leaf senescence; P:brassinosteroid mediated signaling pathway; P:cell surface receptor signaling pathway; C:protein complex; C:extracellular region; P:protein phosphorylation; P:defense response to bacterium; C:plasma membrane; F:transmembrane receptor protein serine/threonine kinase activity; F:ATP binding; F:protein tyrosine kinase activity; C:endosome; P:cell death; F:protein heterodimerizat…	EC:2.7.10; EC:2.7.11	Transferring phosphorus-containing groups; Transferring phosphorus-containing groups
CotAD_23502	Leucine-rich receptor kinase family	983	20	0	62.05	22	P:GO:0010075; P:GO:0007172; P:GO:0010183; P:GO:0007169; P:GO:0046777; P:GO:0048437; C:GO:0000325; F:GO:0004674; P:GO:0009934; F:GO:0043621; C:GO:0005886; P:GO:0051301; F:GO:0005524; C:GO:0009506; P:GO:0001944; C:GO:0016021; P:GO:0030154; P:GO:0010067; P:GO:0010089; F:GO:0033612; C:GO:0090406; P:GO:0010223	P:regulation of meristem growth; P:signal complex assembly; P:pollen tube guidance; P:transmembrane receptor protein tyrosine kinase signaling pathway; P:protein autophosphorylation; P:floral organ development; C:plant-type vacuole; F:protein serine/threonine kinase activity; P:regulation of meristem structural organization; F:protein self-association; C:plasma membrane; P:cell division; F:ATP bi…	EC:2.7.11	Transferring phosphorus-containing groups
CotAD_23850	Leucine-rich repeat kinase family	585	20	0	65.6	13	P:GO:0007169; P:GO:0009610; C:GO:0005774; C:GO:0009505; F:GO:0004674; P:GO:0006468; P:GO:0009834; C:GO:0046658; F:GO:0005524; C:GO:0009506; P:GO:0009737; P:GO:2000605; C:GO:0016021	P:transmembrane receptor protein tyrosine kinase signaling pathway; P:response to symbiotic fungus; C:vacuolar membrane; C:plant-type cell wall; F:protein serine/threonine kinase activity; P:protein phosphorylation; P:plant-type secondary cell wall biogenesis; C:anchored component of plasma membrane; F:ATP binding; C:plasmodesma; P:response to abscisic acid; P:positive regulation of secondary gro…	EC:2.7.11	Transferring phosphorus-containing groups
CotAD_24219	Leucine-rich repeat kinase family	940	20	0	63.45	15	F:GO:0019901; P:GO:0007165; P:GO:0009555; P:GO:0048646; C:GO:0005794; C:GO:0005576; C:GO:0009505; P:GO:0048827; C:GO:0005886; P:GO:0044702; P:GO:0048869; F:GO:0004675; P:GO:0003006; C:GO:0009506; F:GO:0097159	F:protein kinase binding; P:signal transduction; P:pollen development; P:anatomical structure formation involved in morphogenesis; C:Golgi apparatus; C:extracellular region; C:plant-type cell wall; P:phyllome development; C:plasma membrane; P:single organism reproductive process; P:cellular developmental process; F:transmembrane receptor protein serine/threonine kinase activity; P:developmental p…	EC:2.7.11	Transferring phosphorus-containing groups
CotAD_24413	Leucine-rich repeat kinase family	955	20	0	58.1	9	F:GO:0005524; F:GO:0005515; P:GO:0007275; C:GO:0016021; P:GO:0007169; F:GO:0042277; F:GO:0004674; P:GO:0006468; C:GO:0005886	F:ATP binding; F:protein binding; P:multicellular organism development; C:integral component of membrane; P:transmembrane receptor protein tyrosine kinase signaling pathway; F:peptide binding; F:protein serine/threonine kinase activity; P:protein phosphorylation; C:plasma membrane	EC:2.7.11	Transferring phosphorus-containing groups
CotAD_24428	Leucine-rich repeat kinase family	609	20	0	61.55	11	F:GO:0005524; C:GO:0009506; C:GO:0005739; P:GO:2000605; P:GO:0007169; C:GO:0005576; C:GO:0005774; C:GO:0009505; F:GO:0004674; P:GO:0006468; C:GO:0005886	F:ATP binding; C:plasmodesma; C:mitochondrion; P:positive regulation of secondary growth; P:transmembrane receptor protein tyrosine kinase signaling pathway; C:extracellular region; C:vacuolar membrane; C:plant-type cell wall; F:protein serine/threonine kinase activity; P:protein phosphorylation; C:plasma membrane	EC:2.7.11	Transferring phosphorus-containing groups
CotAD_24456	Leucine-rich repeat kinase family	938	20	0	66.05	7	F:GO:0005524; P:GO:0007169; C:GO:0005576; F:GO:0004674; P:GO:0006468; C:GO:0005773; C:GO:0005886	F:ATP binding; P:transmembrane receptor protein tyrosine kinase signaling pathway; C:extracellular region; F:protein serine/threonine kinase activity; P:protein phosphorylation; C:vacuole; C:plasma membrane	EC:2.7.11	Transferring phosphorus-containing groups
CotAD_24493	Leucine-rich repeat kinase family	946	20	0	61.55	11	C:GO:0009507; C:GO:0009506; C:GO:0005829; P:GO:0009555; C:GO:0005794; P:GO:0007166; C:GO:0005576; C:GO:0009505; P:GO:0006468; C:GO:0005886; F:GO:0004675	C:chloroplast; C:plasmodesma; C:cytosol; P:pollen development; C:Golgi apparatus; P:cell surface receptor signaling pathway; C:extracellular region; C:plant-type cell wall; P:protein phosphorylation; C:plasma membrane; F:transmembrane receptor protein serine/threonine kinase activity	EC:2.7.11	Transferring phosphorus-containing groups
CotAD_24661	leucine-rich repeat receptor	1012	20	0	63.5	19	P:GO:0048608; P:GO:0009791; P:GO:0009611; F:GO:0004383; P:GO:0007169; P:GO:0045851; F:GO:0004674; P:GO:0006468; C:GO:0005886; P:GO:0044702; F:GO:0001653; F:GO:0005524; C:GO:0009507; P:GO:0009826; F:GO:0004888; F:GO:0005515; P:GO:0045087; C:GO:0016021; P:GO:0031347	P:reproductive structure development; P:post-embryonic development; P:response to wounding; F:guanylate cyclase activity; P:transmembrane receptor protein tyrosine kinase signaling pathway; P:pH reduction; F:protein serine/threonine kinase activity; P:protein phosphorylation; C:plasma membrane; P:single organism reproductive process; F:peptide receptor activity; F:ATP binding; C:chloroplast; P:un…	EC:2.7.11; EC:4.6.1.2	Transferring phosphorus-containing groups; Guanylate cyclase
CotAD_24711	receptor kinase	1069	20	0	53.5	12	C:GO:0009507; P:GO:0009617; C:GO:0005768; P:GO:0051179; P:GO:0007165; P:GO:0033554; F:GO:0004672; F:GO:0005488; P:GO:0006952; C:GO:0005886; P:GO:0002376; P:GO:0050776	C:chloroplast; P:response to bacterium; C:endosome; P:localization; P:signal transduction; P:cellular response to stress; F:protein kinase activity; F:binding; P:defense response; C:plasma membrane; P:immune system process; P:regulation of immune response
CotAD_24714	receptor kinase	1012	20	7.29e-161	51.25	9	P:GO:0002764; F:GO:0005515; C:GO:0016020; P:GO:0010204; C:GO:0044464; F:GO:0004672; P:GO:0016045; P:GO:0010359; P:GO:0009626	P:immune response-regulating signaling pathway; F:protein binding; C:membrane; P:defense response signaling pathway, resistance gene-independent; C:cell part; F:protein kinase activity; P:detection of bacterium; P:regulation of anion channel activity; P:plant-type hypersensitive response
CotAD_24716	Leucine-rich repeat transmembrane kinase	995	20	0	69.25	9	F:GO:0005524; C:GO:0009506; F:GO:0005515; P:GO:0045088; P:GO:0007169; P:GO:0009861; F:GO:0004674; P:GO:0006468; C:GO:0005886	F:ATP binding; C:plasmodesma; F:protein binding; P:regulation of innate immune response; P:transmembrane receptor protein tyrosine kinase signaling pathway; P:jasmonic acid and ethylene-dependent systemic resistance; F:protein serine/threonine kinase activity; P:protein phosphorylation; C:plasma membrane	EC:2.7.11	Transferring phosphorus-containing groups
CotAD_24717	Leucine-rich repeat transmembrane kinase	1014	20	0	69.45	10	F:GO:0005524; C:GO:0009506; F:GO:0005515; P:GO:0045088; P:GO:0007169; P:GO:0009861; C:GO:0005576; F:GO:0004674; P:GO:0006468; C:GO:0005886	F:ATP binding; C:plasmodesma; F:protein binding; P:regulation of innate immune response; P:transmembrane receptor protein tyrosine kinase signaling pathway; P:jasmonic acid and ethylene-dependent systemic resistance; C:extracellular region; F:protein serine/threonine kinase activity; P:protein phosphorylation; C:plasma membrane	EC:2.7.11	Transferring phosphorus-containing groups
CotAD_24718	Leucine-rich repeat transmembrane kinase	923	20	0	61.7	7	C:GO:0009506; F:GO:0005515; P:GO:0045088; P:GO:0009861; P:GO:0016310; F:GO:0004674; C:GO:0005886	C:plasmodesma; F:protein binding; P:regulation of innate immune response; P:jasmonic acid and ethylene-dependent systemic resistance; P:phosphorylation; F:protein serine/threonine kinase activity; C:plasma membrane	EC:2.7.11	Transferring phosphorus-containing groups
CotAD_24719	Leucine-rich repeat transmembrane kinase	985	20	0	64.2	7	C:GO:0009506; F:GO:0005515; P:GO:0045088; P:GO:0009861; P:GO:0016310; F:GO:0004674; C:GO:0005886	C:plasmodesma; F:protein binding; P:regulation of innate immune response; P:jasmonic acid and ethylene-dependent systemic resistance; P:phosphorylation; F:protein serine/threonine kinase activity; C:plasma membrane	EC:2.7.11	Transferring phosphorus-containing groups
CotAD_24721	Leucine-rich repeat transmembrane kinase	1015	20	0	64.95	9	F:GO:0005524; C:GO:0009506; F:GO:0005515; P:GO:0045088; P:GO:0009861; C:GO:0005576; F:GO:0004674; P:GO:0006468; C:GO:0005886	F:ATP binding; C:plasmodesma; F:protein binding; P:regulation of innate immune response; P:jasmonic acid and ethylene-dependent systemic resistance; C:extracellular region; F:protein serine/threonine kinase activity; P:protein phosphorylation; C:plasma membrane	EC:2.7.11	Transferring phosphorus-containing groups
CotAD_24945	Leucine-rich repeat kinase family	491	20	3.97e-110	83.95	25	P:GO:0009793; P:GO:0007030; P:GO:0009556; P:GO:0046777; F:GO:0008289; C:GO:0005789; F:GO:0005524; P:GO:0008219; F:GO:0004714; F:GO:0046982; P:GO:0050832; F:GO:0033612; P:GO:0010152; F:GO:0042802; P:GO:0007169; P:GO:0009742; C:GO:0043234; P:GO:0042742; C:GO:0005886; F:GO:0004675; P:GO:0002229; C:GO:0016021; C:GO:0010008; P:GO:0010227; P:GO:0016049	P:embryo development ending in seed dormancy; P:Golgi organization; P:microsporogenesis; P:protein autophosphorylation; F:lipid binding; C:endoplasmic reticulum membrane; F:ATP binding; P:cell death; F:transmembrane receptor protein tyrosine kinase activity; F:protein heterodimerization activity; P:defense response to fungus; F:receptor serine/threonine kinase binding; P:pollen maturation; F:iden…	EC:2.7.10; EC:2.7.10.1; EC:2.7.11	Transferring phosphorus-containing groups; Receptor protein-tyrosine kinase; Transferring phosphorus-containing groups
CotAD_25005	receptor kinase	619	20	0	65.75	29	P:GO:1900150; P:GO:0009556; P:GO:0060548; F:GO:0005496; P:GO:0006468; P:GO:0009911; P:GO:0009729; F:GO:0005524; C:GO:0009507; P:GO:0009826; C:GO:0005768; C:GO:0009506; F:GO:0046982; P:GO:0048366; F:GO:0033612; P:GO:0010234; P:GO:1900140; F:GO:0042803; P:GO:0009742; C:GO:0043234; F:GO:0004674; P:GO:1900425; P:GO:0042742; C:GO:0005886; C:GO:0005634; C:GO:0016021; P:GO:0010584; P:GO:0010224; P:GO:00…	P:regulation of defense response to fungus; P:microsporogenesis; P:negative regulation of cell death; F:steroid binding; P:protein phosphorylation; P:positive regulation of flower development; P:detection of brassinosteroid stimulus; F:ATP binding; C:chloroplast; P:unidimensional cell growth; C:endosome; C:plasmodesma; F:protein heterodimerization activity; P:leaf development; F:receptor serine/t…	EC:2.7.11	Transferring phosphorus-containing groups
CotAD_25154	Leucine-rich repeat kinase family	959	20	0	70.2	8	F:GO:0005524; C:GO:0009507; C:GO:0016021; P:GO:0007169; C:GO:0005576; F:GO:0004674; P:GO:0006468; C:GO:0005886	F:ATP binding; C:chloroplast; C:integral component of membrane; P:transmembrane receptor protein tyrosine kinase signaling pathway; C:extracellular region; F:protein serine/threonine kinase activity; P:protein phosphorylation; C:plasma membrane	EC:2.7.11	Transferring phosphorus-containing groups
CotAD_25309	Leucine-rich receptor kinase family	1128	20	0	59.15	16	C:GO:0043229; P:GO:0048608; F:GO:0038023; P:GO:0007169; P:GO:0000226; F:GO:0004674; P:GO:0006468; P:GO:0006952; C:GO:0009504; C:GO:0005886; P:GO:0044702; C:GO:0043227; F:GO:0005524; P:GO:0006955; C:GO:0016021; P:GO:0010103	C:intracellular organelle; P:reproductive structure development; F:signaling receptor activity; P:transmembrane receptor protein tyrosine kinase signaling pathway; P:microtubule cytoskeleton organization; F:protein serine/threonine kinase activity; P:protein phosphorylation; P:defense response; C:cell plate; C:plasma membrane; P:single organism reproductive process; C:membrane-bounded organelle; …	EC:2.7.11	Transferring phosphorus-containing groups
CotAD_25377	Leucine-rich repeat kinase family	885	20	0	62.3	8	F:GO:0005524; P:GO:0048367; P:GO:0009791; C:GO:0016021; P:GO:0007169; F:GO:0004674; P:GO:0006468; C:GO:0005886	F:ATP binding; P:shoot system development; P:post-embryonic development; C:integral component of membrane; P:transmembrane receptor protein tyrosine kinase signaling pathway; F:protein serine/threonine kinase activity; P:protein phosphorylation; C:plasma membrane	EC:2.7.11	Transferring phosphorus-containing groups
CotAD_25446	Leucine-rich repeat kinase family	659	20	0	59.4	6	F:GO:0005524; C:GO:0016021; P:GO:0007169; F:GO:0004674; P:GO:0006468; C:GO:0005886	F:ATP binding; C:integral component of membrane; P:transmembrane receptor protein tyrosine kinase signaling pathway; F:protein serine/threonine kinase activity; P:protein phosphorylation; C:plasma membrane	EC:2.7.11	Transferring phosphorus-containing groups
CotAD_25642	Leucine-rich receptor kinase family	985	20	0	62.95	20	P:GO:1902025; P:GO:0010051; P:GO:0010183; P:GO:0007169; P:GO:0046777; P:GO:0009960; F:GO:0004674; P:GO:0009845; C:GO:0005886; F:GO:0005524; P:GO:0006979; P:GO:0045490; F:GO:0005515; P:GO:0001944; P:GO:0010468; F:GO:0017046; P:GO:0010227; P:GO:0090548; C:GO:0090406; P:GO:0010102	P:nitrate import; P:xylem and phloem pattern formation; P:pollen tube guidance; P:transmembrane receptor protein tyrosine kinase signaling pathway; P:protein autophosphorylation; P:endosperm development; F:protein serine/threonine kinase activity; P:seed germination; C:plasma membrane; F:ATP binding; P:response to oxidative stress; P:pectin catabolic process; F:protein binding; P:vasculature deve…	EC:2.7.11	Transferring phosphorus-containing groups
CotAD_25702	Leucine-rich repeat transmembrane kinase	852	20	0	57.45	7	C:GO:0009506; F:GO:0005515; P:GO:0045088; F:GO:0004672; P:GO:0009861; P:GO:0016310; C:GO:0005886	C:plasmodesma; F:protein binding; P:regulation of innate immune response; F:protein kinase activity; P:jasmonic acid and ethylene-dependent systemic resistance; P:phosphorylation; C:plasma membrane
CotAD_25705	Leucine-rich repeat transmembrane kinase	955	20	0	61.35	7	C:GO:0009506; F:GO:0005515; P:GO:0045088; P:GO:0009861; P:GO:0016310; F:GO:0004674; C:GO:0005886	C:plasmodesma; F:protein binding; P:regulation of innate immune response; P:jasmonic acid and ethylene-dependent systemic resistance; P:phosphorylation; F:protein serine/threonine kinase activity; C:plasma membrane	EC:2.7.11	Transferring phosphorus-containing groups
CotAD_25801	Leucine-rich receptor kinase family	1098	20	0	53.75	16	P:GO:0010152; P:GO:0009651; P:GO:0010073; P:GO:0051260; F:GO:0004674; P:GO:0009846; P:GO:0009945; P:GO:0048508; C:GO:0005886; P:GO:0009414; P:GO:0009942; C:GO:0005777; P:GO:0009409; P:GO:0009738; P:GO:0048653; P:GO:0009808	P:pollen maturation; P:response to salt stress; P:meristem maintenance; P:protein homooligomerization; F:protein serine/threonine kinase activity; P:pollen germination; P:radial axis specification; P:embryonic meristem development; C:plasma membrane; P:response to water deprivation; P:longitudinal axis specification; C:peroxisome; P:response to cold; P:abscisic acid-activated signaling pathway; P…	EC:2.7.11	Transferring phosphorus-containing groups
CotAD_25896	receptor kinase	1088	20	0	50.7	15	F:GO:0038023; P:GO:0007169; P:GO:0048646; F:GO:0004674; P:GO:0006468; P:GO:0009725; P:GO:0048827; C:GO:0005886; P:GO:0044702; P:GO:0048869; F:GO:0005524; P:GO:0003006; C:GO:0031966; F:GO:0005515; C:GO:0016021	F:signaling receptor activity; P:transmembrane receptor protein tyrosine kinase signaling pathway; P:anatomical structure formation involved in morphogenesis; F:protein serine/threonine kinase activity; P:protein phosphorylation; P:response to hormone; P:phyllome development; C:plasma membrane; P:single organism reproductive process; P:cellular developmental process; F:ATP binding; P:developmenta…	EC:2.7.11	Transferring phosphorus-containing groups
CotAD_26081	Leucine-rich repeat kinase family	589	20	0	63.9	12	F:GO:0005524; C:GO:0009506; P:GO:0009737; C:GO:0005739; P:GO:2000605; P:GO:0007169; P:GO:0009610; C:GO:0005774; C:GO:0009505; F:GO:0004674; P:GO:0006468; C:GO:0046658	F:ATP binding; C:plasmodesma; P:response to abscisic acid; C:mitochondrion; P:positive regulation of secondary growth; P:transmembrane receptor protein tyrosine kinase signaling pathway; P:response to symbiotic fungus; C:vacuolar membrane; C:plant-type cell wall; F:protein serine/threonine kinase activity; P:protein phosphorylation; C:anchored component of plasma membrane	EC:2.7.11	Transferring phosphorus-containing groups
CotAD_26531	Leucine-rich receptor kinase family	985	20	0	55.05	10	F:GO:0005524; P:GO:0003006; F:GO:0005515; P:GO:0048731; P:GO:0007169; P:GO:0051704; F:GO:0004674; P:GO:0006468; P:GO:0048507; C:GO:0005886	F:ATP binding; P:developmental process involved in reproduction; F:protein binding; P:system development; P:transmembrane receptor protein tyrosine kinase signaling pathway; P:multi-organism process; F:protein serine/threonine kinase activity; P:protein phosphorylation; P:meristem development; C:plasma membrane	EC:2.7.11	Transferring phosphorus-containing groups
CotAD_26554	Leucine-rich repeat kinase family	938	20	0	58.6	15	P:GO:0009791; P:GO:0009555; C:GO:0005794; P:GO:0007166; C:GO:0005576; C:GO:0009505; F:GO:0005488; P:GO:0006468; C:GO:0005886; P:GO:0044702; F:GO:0004675; P:GO:0003006; C:GO:0009506; P:GO:0048367; C:GO:0005829	P:post-embryonic development; P:pollen development; C:Golgi apparatus; P:cell surface receptor signaling pathway; C:extracellular region; C:plant-type cell wall; F:binding; P:protein phosphorylation; C:plasma membrane; P:single organism reproductive process; F:transmembrane receptor protein serine/threonine kinase activity; P:developmental process involved in reproduction; C:plasmodesma; P:shoot …	EC:2.7.11	Transferring phosphorus-containing groups
CotAD_26963	Leucine-rich repeat kinase family	620	20	4.32e-173	57.05	11	C:GO:0090404; F:GO:0042802; C:GO:0009506; P:GO:0009860; C:GO:0005737; P:GO:0010183; P:GO:0016310; F:GO:0004674; P:GO:0009846; C:GO:0016324; P:GO:0080092	C:pollen tube tip; F:identical protein binding; C:plasmodesma; P:pollen tube growth; C:cytoplasm; P:pollen tube guidance; P:phosphorylation; F:protein serine/threonine kinase activity; P:pollen germination; C:apical plasma membrane; P:regulation of pollen tube growth	EC:2.7.11	Transferring phosphorus-containing groups
CotAD_26995	leucine-rich repeat receptor	728	20	0	67.4	10	C:GO:0005634; F:GO:0005524; C:GO:0016021; C:GO:0005829; P:GO:0007169; C:GO:0005576; P:GO:0006468; P:GO:0007623; C:GO:0005886; F:GO:0004675	C:nucleus; F:ATP binding; C:integral component of membrane; C:cytosol; P:transmembrane receptor protein tyrosine kinase signaling pathway; C:extracellular region; P:protein phosphorylation; P:circadian rhythm; C:plasma membrane; F:transmembrane receptor protein serine/threonine kinase activity	EC:2.7.11	Transferring phosphorus-containing groups
CotAD_27211	Leucine-rich repeat kinase family	920	20	0	61.45	11	C:GO:0009506; F:GO:0097159; C:GO:0005829; P:GO:0009555; C:GO:0005794; P:GO:0007166; C:GO:0005576; C:GO:0009505; P:GO:0006468; C:GO:0005886; F:GO:0004675	C:plasmodesma; F:organic cyclic compound binding; C:cytosol; P:pollen development; C:Golgi apparatus; P:cell surface receptor signaling pathway; C:extracellular region; C:plant-type cell wall; P:protein phosphorylation; C:plasma membrane; F:transmembrane receptor protein serine/threonine kinase activity	EC:2.7.11	Transferring phosphorus-containing groups
CotAD_27412	Leucine-rich repeat kinase family	630	20	0	63.4	13	P:GO:0007169; P:GO:0009610; C:GO:0005774; C:GO:0009505; F:GO:0004674; P:GO:0006468; C:GO:0046658; F:GO:0005524; C:GO:0009506; P:GO:0009737; C:GO:0005739; P:GO:2000605; C:GO:0016021	P:transmembrane receptor protein tyrosine kinase signaling pathway; P:response to symbiotic fungus; C:vacuolar membrane; C:plant-type cell wall; F:protein serine/threonine kinase activity; P:protein phosphorylation; C:anchored component of plasma membrane; F:ATP binding; C:plasmodesma; P:response to abscisic acid; C:mitochondrion; P:positive regulation of secondary growth; C:integral component of…	EC:2.7.11	Transferring phosphorus-containing groups
CotAD_27936	Leucine-rich receptor kinase family	954	20	0	57.1	8	F:GO:0005524; P:GO:0003006; F:GO:0005515; P:GO:0048731; P:GO:0007169; F:GO:0004674; P:GO:0006468; C:GO:0005886	F:ATP binding; P:developmental process involved in reproduction; F:protein binding; P:system development; P:transmembrane receptor protein tyrosine kinase signaling pathway; F:protein serine/threonine kinase activity; P:protein phosphorylation; C:plasma membrane	EC:2.7.11	Transferring phosphorus-containing groups
CotAD_27954	Leucine-rich repeat kinase family	977	20	0	68.25	7	F:GO:0005524; C:GO:0009507; P:GO:0007169; C:GO:0005576; F:GO:0004674; P:GO:0006468; C:GO:0005886	F:ATP binding; C:chloroplast; P:transmembrane receptor protein tyrosine kinase signaling pathway; C:extracellular region; F:protein serine/threonine kinase activity; P:protein phosphorylation; C:plasma membrane	EC:2.7.11	Transferring phosphorus-containing groups
CotAD_27957	Leucine-rich repeat kinase family	628	20	0	63.75	13	P:GO:0007169; P:GO:0009610; C:GO:0005576; C:GO:0005774; C:GO:0009505; F:GO:0004674; P:GO:0006468; C:GO:0046658; F:GO:0005524; C:GO:0009506; P:GO:0009737; C:GO:0005739; P:GO:2000605	P:transmembrane receptor protein tyrosine kinase signaling pathway; P:response to symbiotic fungus; C:extracellular region; C:vacuolar membrane; C:plant-type cell wall; F:protein serine/threonine kinase activity; P:protein phosphorylation; C:anchored component of plasma membrane; F:ATP binding; C:plasmodesma; P:response to abscisic acid; C:mitochondrion; P:positive regulation of secondary growth	EC:2.7.11	Transferring phosphorus-containing groups
CotAD_28043	Leucine-rich repeat kinase family	886	20	0	62.9	8	F:GO:0005524; P:GO:0048367; P:GO:0009791; C:GO:0016021; P:GO:0007169; F:GO:0004674; P:GO:0006468; C:GO:0005886	F:ATP binding; P:shoot system development; P:post-embryonic development; C:integral component of membrane; P:transmembrane receptor protein tyrosine kinase signaling pathway; F:protein serine/threonine kinase activity; P:protein phosphorylation; C:plasma membrane	EC:2.7.11	Transferring phosphorus-containing groups
CotAD_28062	Leucine-rich repeat kinase family	684	20	0	55.25	5	F:GO:0005524; P:GO:0007169; F:GO:0004674; P:GO:0006468; C:GO:0005886	F:ATP binding; P:transmembrane receptor protein tyrosine kinase signaling pathway; F:protein serine/threonine kinase activity; P:protein phosphorylation; C:plasma membrane	EC:2.7.11	Transferring phosphorus-containing groups
CotAD_28297	Leucine-rich repeat kinase family	641	20	0	56.95	7	F:GO:0005524; C:GO:0009507; P:GO:0010070; P:GO:0007169; F:GO:0004674; P:GO:0006468; C:GO:0005886	F:ATP binding; C:chloroplast; P:zygote asymmetric cell division; P:transmembrane receptor protein tyrosine kinase signaling pathway; F:protein serine/threonine kinase activity; P:protein phosphorylation; C:plasma membrane	EC:2.7.11	Transferring phosphorus-containing groups
CotAD_28410	somatic embryogenesis receptor-like kinase 5	545	20	0	81.05	28	P:GO:0009793; P:GO:0007030; P:GO:0009556; P:GO:0046777; P:GO:0060548; F:GO:0008289; F:GO:0005524; P:GO:0008219; F:GO:0004714; F:GO:0046982; P:GO:0050832; F:GO:0033612; P:GO:0010152; F:GO:0042802; P:GO:1900140; P:GO:0010150; P:GO:0009742; P:GO:0007166; C:GO:0043234; P:GO:0042742; C:GO:0005886; F:GO:0004675; P:GO:0002229; C:GO:0016021; C:GO:0010008; P:GO:0010227; P:GO:0010200; P:GO:0016049	P:embryo development ending in seed dormancy; P:Golgi organization; P:microsporogenesis; P:protein autophosphorylation; P:negative regulation of cell death; F:lipid binding; F:ATP binding; P:cell death; F:transmembrane receptor protein tyrosine kinase activity; F:protein heterodimerization activity; P:defense response to fungus; F:receptor serine/threonine kinase binding; P:pollen maturation; F:i…	EC:2.7.10; EC:2.7.10.1; EC:2.7.11	Transferring phosphorus-containing groups; Receptor protein-tyrosine kinase; Transferring phosphorus-containing groups
CotAD_28712	receptor kinase	606	20	0	67.15	31	P:GO:1900150; P:GO:0009556; P:GO:0060548; F:GO:0005496; C:GO:0005576; P:GO:0006468; P:GO:0009911; P:GO:0009729; F:GO:0005524; C:GO:0009507; P:GO:0009826; C:GO:0005768; C:GO:0009506; F:GO:0046982; P:GO:0048366; F:GO:0033612; P:GO:0010234; P:GO:1900140; F:GO:0042803; P:GO:0007169; P:GO:0009742; C:GO:0043234; F:GO:0004674; P:GO:1900425; P:GO:0042742; C:GO:0005886; C:GO:0005634; C:GO:0016021; P:GO:00…	P:regulation of defense response to fungus; P:microsporogenesis; P:negative regulation of cell death; F:steroid binding; C:extracellular region; P:protein phosphorylation; P:positive regulation of flower development; P:detection of brassinosteroid stimulus; F:ATP binding; C:chloroplast; P:unidimensional cell growth; C:endosome; C:plasmodesma; F:protein heterodimerization activity; P:leaf developm…	EC:2.7.11	Transferring phosphorus-containing groups
CotAD_28859	leucine-rich repeat receptor	795	20	0	68.05	16	P:GO:0010063; P:GO:0010071; P:GO:0000902; P:GO:0007169; C:GO:0005576; P:GO:0006468; P:GO:0007623; C:GO:0005886; P:GO:0042127; F:GO:0004675; F:GO:0005524; C:GO:0009506; P:GO:0048366; P:GO:0010305; P:GO:0048481; P:GO:0010059	P:positive regulation of trichoblast fate specification; P:root meristem specification; P:cell morphogenesis; P:transmembrane receptor protein tyrosine kinase signaling pathway; C:extracellular region; P:protein phosphorylation; P:circadian rhythm; C:plasma membrane; P:regulation of cell proliferation; F:transmembrane receptor protein serine/threonine kinase activity; F:ATP binding; C:plasmodesma…	EC:2.7.11	Transferring phosphorus-containing groups
CotAD_28916	Leucine-rich receptor kinase family	996	20	0	62.25	16	P:GO:0010075; P:GO:0010183; P:GO:0007169; P:GO:0046777; F:GO:0004674; P:GO:0009845; C:GO:0005886; F:GO:0005524; P:GO:0006979; P:GO:0045490; F:GO:0005515; P:GO:0001944; P:GO:0010468; P:GO:0010227; C:GO:0090406; P:GO:0010102	P:regulation of meristem growth; P:pollen tube guidance; P:transmembrane receptor protein tyrosine kinase signaling pathway; P:protein autophosphorylation; F:protein serine/threonine kinase activity; P:seed germination; C:plasma membrane; F:ATP binding; P:response to oxidative stress; P:pectin catabolic process; F:protein binding; P:vasculature development; P:regulation of gene expression; P:flor…	EC:2.7.11	Transferring phosphorus-containing groups
CotAD_29297	Leucine-rich repeat kinase family	589	20	0	64.65	12	F:GO:0005524; C:GO:0009506; P:GO:0009737; C:GO:0005739; P:GO:2000605; P:GO:0007169; P:GO:0009610; C:GO:0005774; C:GO:0009505; F:GO:0004674; P:GO:0006468; C:GO:0046658	F:ATP binding; C:plasmodesma; P:response to abscisic acid; C:mitochondrion; P:positive regulation of secondary growth; P:transmembrane receptor protein tyrosine kinase signaling pathway; P:response to symbiotic fungus; C:vacuolar membrane; C:plant-type cell wall; F:protein serine/threonine kinase activity; P:protein phosphorylation; C:anchored component of plasma membrane	EC:2.7.11	Transferring phosphorus-containing groups
CotAD_29800	Leucine-rich repeat kinase family	583	20	2.44e-66	46.05	3	C:GO:0016020; P:GO:0009987; C:GO:0071944	C:membrane; P:cellular process; C:cell periphery
CotAD_30717	leucine-rich repeat receptor	939	20	0	62.8	15	P:GO:0007165; P:GO:0009555; P:GO:0048646; C:GO:0005794; C:GO:0005576; C:GO:0009505; P:GO:0048827; C:GO:0005886; P:GO:0044702; P:GO:0048869; F:GO:0004675; P:GO:0003006; C:GO:0009506; F:GO:0005515; F:GO:0097159	P:signal transduction; P:pollen development; P:anatomical structure formation involved in morphogenesis; C:Golgi apparatus; C:extracellular region; C:plant-type cell wall; P:phyllome development; C:plasma membrane; P:single organism reproductive process; P:cellular developmental process; F:transmembrane receptor protein serine/threonine kinase activity; P:developmental process involved in reprodu…	EC:2.7.11	Transferring phosphorus-containing groups
CotAD_30953	Leucine-rich repeat receptor kinase family	756	20	0	58.65	8	C:GO:0009506; F:GO:0005515; P:GO:0007275; P:GO:0010183; F:GO:0004672; C:GO:0005886; P:GO:0009987; C:GO:0090406	C:plasmodesma; F:protein binding; P:multicellular organism development; P:pollen tube guidance; F:protein kinase activity; C:plasma membrane; P:cellular process; C:pollen tube
CotAD_30976	Leucine-rich repeat receptor kinase family	1043	20	0	53.2	9	P:GO:0048364; C:GO:0009506; F:GO:0005515; P:GO:0010183; F:GO:0016301; P:GO:0048507; P:GO:0050789; C:GO:0005886; C:GO:0090406	P:root development; C:plasmodesma; F:protein binding; P:pollen tube guidance; F:kinase activity; P:meristem development; P:regulation of biological process; C:plasma membrane; C:pollen tube
CotAD_30977	Leucine-rich repeat receptor kinase family	1050	20	0	54.2	7	C:GO:0009506; F:GO:0005515; P:GO:0007275; P:GO:0010183; F:GO:0016301; C:GO:0005886; C:GO:0090406	C:plasmodesma; F:protein binding; P:multicellular organism development; P:pollen tube guidance; F:kinase activity; C:plasma membrane; C:pollen tube
CotAD_30981	Leucine-rich repeat kinase family	732	20	5.73e-106	52	3	C:GO:0016020; C:GO:0044464; P:GO:0009987	C:membrane; C:cell part; P:cellular process
CotAD_31161	Leucine-rich receptor kinase family	957	20	0	58.9	23	P:GO:0007172; P:GO:1902025; P:GO:0010051; P:GO:0007169; P:GO:0046777; C:GO:0000325; P:GO:0009960; F:GO:0004674; P:GO:0009934; F:GO:0043621; P:GO:0009845; C:GO:0005886; F:GO:0005524; P:GO:0006979; P:GO:0045490; C:GO:0009506; P:GO:0010468; P:GO:0030154; F:GO:0017046; P:GO:0010227; F:GO:0033612; P:GO:0090548; P:GO:0010102	P:signal complex assembly; P:nitrate import; P:xylem and phloem pattern formation; P:transmembrane receptor protein tyrosine kinase signaling pathway; P:protein autophosphorylation; C:plant-type vacuole; P:endosperm development; F:protein serine/threonine kinase activity; P:regulation of meristem structural organization; F:protein self-association; P:seed germination; C:plasma membrane; F:ATP bin…	EC:2.7.11	Transferring phosphorus-containing groups
CotAD_31330	Leucine-rich repeat kinase family	654	20	0	61.1	5	F:GO:0005524; P:GO:0007169; F:GO:0004674; P:GO:0006468; C:GO:0005886	F:ATP binding; P:transmembrane receptor protein tyrosine kinase signaling pathway; F:protein serine/threonine kinase activity; P:protein phosphorylation; C:plasma membrane	EC:2.7.11	Transferring phosphorus-containing groups
CotAD_31444	Leucine-rich repeat transmembrane kinase	883	20	0	67.2	3	F:GO:0004672; P:GO:0016310; C:GO:0005886	F:protein kinase activity; P:phosphorylation; C:plasma membrane
CotAD_31541	Leucine-rich repeat kinase family	953	20	0	61	9	F:GO:0019901; C:GO:0009507; C:GO:0009506; P:GO:0007165; P:GO:0009555; C:GO:0005794; C:GO:0009505; C:GO:0005886; F:GO:0004675	F:protein kinase binding; C:chloroplast; C:plasmodesma; P:signal transduction; P:pollen development; C:Golgi apparatus; C:plant-type cell wall; C:plasma membrane; F:transmembrane receptor protein serine/threonine kinase activity	EC:2.7.11	Transferring phosphorus-containing groups
CotAD_31636	Leucine-rich repeat kinase family	1029	20	0	55.15	14	P:GO:0006468; P:GO:0009626; C:GO:0005886; P:GO:0002764; P:GO:0003006; C:GO:0009507; C:GO:0005768; F:GO:0005515; P:GO:0051179; P:GO:0048731; F:GO:0019199; P:GO:0010204; P:GO:0016045; P:GO:0010359	P:protein phosphorylation; P:plant-type hypersensitive response; C:plasma membrane; P:immune response-regulating signaling pathway; P:developmental process involved in reproduction; C:chloroplast; C:endosome; F:protein binding; P:localization; P:system development; F:transmembrane receptor protein kinase activity; P:defense response signaling pathway, resistance gene-independent; P:detection of b…	EC:2.7.11	Transferring phosphorus-containing groups
CotAD_31665	Leucine-rich repeat kinase family	643	20	0	53.05	13	P:GO:0007169; F:GO:0004674; P:GO:0006468; P:GO:0006952; P:GO:0060862; P:GO:0048507; C:GO:0005886; F:GO:0005524; P:GO:0031349; F:GO:0004714; C:GO:0016021; P:GO:0010942; P:GO:0010015	P:transmembrane receptor protein tyrosine kinase signaling pathway; F:protein serine/threonine kinase activity; P:protein phosphorylation; P:defense response; P:negative regulation of floral organ abscission; P:meristem development; C:plasma membrane; F:ATP binding; P:positive regulation of defense response; F:transmembrane receptor protein tyrosine kinase activity; C:integral component of membra…	EC:2.7.10; EC:2.7.10.1; EC:2.7.11	Transferring phosphorus-containing groups; Receptor protein-tyrosine kinase; Transferring phosphorus-containing groups
CotAD_31758	Leucine-rich repeat kinase family	808	20	0	54.1	9	C:GO:0009506; P:GO:0048731; F:GO:0004672; C:GO:0009505; F:GO:0005488; P:GO:0050789; C:GO:0005886; P:GO:0009888; P:GO:0009987	C:plasmodesma; P:system development; F:protein kinase activity; C:plant-type cell wall; F:binding; P:regulation of biological process; C:plasma membrane; P:tissue development; P:cellular process
CotAD_31836	Leucine-rich receptor kinase family	1000	20	0	61.15	15	P:GO:0010075; P:GO:0010183; P:GO:0046777; P:GO:0048437; F:GO:0004674; C:GO:0005886; P:GO:0051301; F:GO:0005524; F:GO:0005515; P:GO:0050794; P:GO:0001944; P:GO:0010067; P:GO:0010089; C:GO:0090406; P:GO:0010223	P:regulation of meristem growth; P:pollen tube guidance; P:protein autophosphorylation; P:floral organ development; F:protein serine/threonine kinase activity; C:plasma membrane; P:cell division; F:ATP binding; F:protein binding; P:regulation of cellular process; P:vasculature development; P:procambium histogenesis; P:xylem development; C:pollen tube; P:secondary shoot formation	EC:2.7.11	Transferring phosphorus-containing groups
CotAD_31999	Leucine-rich repeat kinase family	726	20	0	63.4	9	F:GO:0005515; P:GO:0010183; C:GO:0012505; P:GO:0007166; P:GO:0016310; P:GO:0048765; F:GO:0004674; C:GO:0005886; C:GO:0090406	F:protein binding; P:pollen tube guidance; C:endomembrane system; P:cell surface receptor signaling pathway; P:phosphorylation; P:root hair cell differentiation; F:protein serine/threonine kinase activity; C:plasma membrane; C:pollen tube	EC:2.7.11	Transferring phosphorus-containing groups
CotAD_32107	Leucine-rich repeat kinase family	765	20	0	62.25	9	F:GO:0005524; C:GO:0009507; P:GO:0010070; C:GO:0016020; P:GO:0007169; C:GO:0005576; F:GO:0004674; P:GO:0006468; C:GO:0071944	F:ATP binding; C:chloroplast; P:zygote asymmetric cell division; C:membrane; P:transmembrane receptor protein tyrosine kinase signaling pathway; C:extracellular region; F:protein serine/threonine kinase activity; P:protein phosphorylation; C:cell periphery	EC:2.7.11	Transferring phosphorus-containing groups
CotAD_32119	Leucine-rich repeat kinase family	659	20	0	61.1	5	F:GO:0005524; P:GO:0007169; F:GO:0004674; P:GO:0006468; C:GO:0005886	F:ATP binding; P:transmembrane receptor protein tyrosine kinase signaling pathway; F:protein serine/threonine kinase activity; P:protein phosphorylation; C:plasma membrane	EC:2.7.11	Transferring phosphorus-containing groups
CotAD_32175	Leucine-rich repeat receptor kinase family	952	20	0	54.55	7	C:GO:0009506; F:GO:0005515; P:GO:0007275; P:GO:0010183; F:GO:0016301; C:GO:0005886; C:GO:0090406	C:plasmodesma; F:protein binding; P:multicellular organism development; P:pollen tube guidance; F:kinase activity; C:plasma membrane; C:pollen tube
CotAD_32393	Leucine-rich receptor kinase family	797	20	0	65.85	18	P:GO:1902025; P:GO:0010051; P:GO:0007169; P:GO:0046777; P:GO:0009960; F:GO:0004674; P:GO:0009845; C:GO:0005886; F:GO:0005524; P:GO:0006979; P:GO:0045490; F:GO:0005515; C:GO:0016021; P:GO:0010468; F:GO:0017046; P:GO:0010227; P:GO:0090548; P:GO:0010102	P:nitrate import; P:xylem and phloem pattern formation; P:transmembrane receptor protein tyrosine kinase signaling pathway; P:protein autophosphorylation; P:endosperm development; F:protein serine/threonine kinase activity; P:seed germination; C:plasma membrane; F:ATP binding; P:response to oxidative stress; P:pectin catabolic process; F:protein binding; C:integral component of membrane; P:regula…	EC:2.7.11	Transferring phosphorus-containing groups
CotAD_32395	Leucine-rich receptor kinase family	956	20	0	59.2	20	P:GO:1902025; P:GO:0010051; P:GO:0010183; P:GO:0046777; P:GO:0009960; F:GO:0004674; P:GO:0009845; C:GO:0005886; F:GO:0005524; P:GO:0006979; P:GO:0045490; F:GO:0005515; P:GO:0001944; C:GO:0016021; P:GO:0010468; F:GO:0017046; P:GO:0010227; P:GO:0090548; C:GO:0090406; P:GO:0010102	P:nitrate import; P:xylem and phloem pattern formation; P:pollen tube guidance; P:protein autophosphorylation; P:endosperm development; F:protein serine/threonine kinase activity; P:seed germination; C:plasma membrane; F:ATP binding; P:response to oxidative stress; P:pectin catabolic process; F:protein binding; P:vasculature development; C:integral component of membrane; P:regulation of gene expr…	EC:2.7.11	Transferring phosphorus-containing groups
CotAD_33020	Leucine-rich repeat kinase family	723	20	0	61.8	6	F:GO:0005524; C:GO:0016020; P:GO:0007169; F:GO:0004674; P:GO:0006468; C:GO:0071944	F:ATP binding; C:membrane; P:transmembrane receptor protein tyrosine kinase signaling pathway; F:protein serine/threonine kinase activity; P:protein phosphorylation; C:cell periphery	EC:2.7.11	Transferring phosphorus-containing groups
CotAD_33139	Leucine-rich repeat kinase family	1111	20	2.2e-156	55.25	9	P:GO:0002764; C:GO:0009507; F:GO:0005515; P:GO:0010204; F:GO:0004672; P:GO:0016045; P:GO:0010359; P:GO:0009626; C:GO:0005886	P:immune response-regulating signaling pathway; C:chloroplast; F:protein binding; P:defense response signaling pathway, resistance gene-independent; F:protein kinase activity; P:detection of bacterium; P:regulation of anion channel activity; P:plant-type hypersensitive response; C:plasma membrane
CotAD_33194	leucine-rich repeat receptor	726	20	0	64.45	10	C:GO:0005634; F:GO:0005524; C:GO:0009506; C:GO:0016021; C:GO:0005829; P:GO:0007166; C:GO:0005576; P:GO:0006468; C:GO:0005886; F:GO:0004675	C:nucleus; F:ATP binding; C:plasmodesma; C:integral component of membrane; C:cytosol; P:cell surface receptor signaling pathway; C:extracellular region; P:protein phosphorylation; C:plasma membrane; F:transmembrane receptor protein serine/threonine kinase activity	EC:2.7.11	Transferring phosphorus-containing groups
CotAD_33226	Leucine-rich receptor kinase family	556	20	2.16e-131	50.25	12	P:GO:0003006; P:GO:0048731; P:GO:2000604; F:GO:0004672; P:GO:0009653; P:GO:0044763; P:GO:0051704; F:GO:0005488; P:GO:0006468; P:GO:0048507; C:GO:0005886; P:GO:0050896	P:developmental process involved in reproduction; P:system development; P:negative regulation of secondary growth; F:protein kinase activity; P:anatomical structure morphogenesis; P:single-organism cellular process; P:multi-organism process; F:binding; P:protein phosphorylation; P:meristem development; C:plasma membrane; P:response to stimulus
CotAD_33376	somatic embryogenesis receptor-like kinase 5	612	20	0	76.35	27	P:GO:0009793; P:GO:0007030; P:GO:0009556; P:GO:0046777; P:GO:0060548; F:GO:0005524; P:GO:0008219; F:GO:0004714; F:GO:0046982; P:GO:0050832; F:GO:0033612; P:GO:0010152; F:GO:0042802; P:GO:1900140; P:GO:0010150; P:GO:0009742; P:GO:0007166; C:GO:0043234; P:GO:0042742; C:GO:0005886; F:GO:0004675; P:GO:0002229; C:GO:0016021; C:GO:0010008; P:GO:0010227; P:GO:0010200; P:GO:0016049	P:embryo development ending in seed dormancy; P:Golgi organization; P:microsporogenesis; P:protein autophosphorylation; P:negative regulation of cell death; F:ATP binding; P:cell death; F:transmembrane receptor protein tyrosine kinase activity; F:protein heterodimerization activity; P:defense response to fungus; F:receptor serine/threonine kinase binding; P:pollen maturation; F:identical protein …	EC:2.7.10; EC:2.7.10.1; EC:2.7.11	Transferring phosphorus-containing groups; Receptor protein-tyrosine kinase; Transferring phosphorus-containing groups
CotAD_33377	somatic embryogenesis receptor-like kinase 5	513	20	0	79.85	28	P:GO:0009793; P:GO:0007030; P:GO:0009556; P:GO:0046777; P:GO:0060548; C:GO:0005789; F:GO:0005524; P:GO:0008219; F:GO:0004714; F:GO:0046982; P:GO:0050832; F:GO:0033612; P:GO:0010152; F:GO:0042802; P:GO:1900140; P:GO:0010150; P:GO:0009742; P:GO:0007166; C:GO:0043234; P:GO:0042742; C:GO:0005886; F:GO:0004675; P:GO:0002229; C:GO:0016021; C:GO:0010008; P:GO:0010227; P:GO:0010200; P:GO:0016049	P:embryo development ending in seed dormancy; P:Golgi organization; P:microsporogenesis; P:protein autophosphorylation; P:negative regulation of cell death; C:endoplasmic reticulum membrane; F:ATP binding; P:cell death; F:transmembrane receptor protein tyrosine kinase activity; F:protein heterodimerization activity; P:defense response to fungus; F:receptor serine/threonine kinase binding; P:polle…	EC:2.7.10; EC:2.7.10.1; EC:2.7.11	Transferring phosphorus-containing groups; Receptor protein-tyrosine kinase; Transferring phosphorus-containing groups
CotAD_33520	Leucine-rich repeat kinase family	922	20	0	61	11	C:GO:0009506; C:GO:0005829; P:GO:0009555; C:GO:0005794; P:GO:0007166; C:GO:0005576; C:GO:0009505; F:GO:0005488; P:GO:0006468; C:GO:0005886; F:GO:0004675	C:plasmodesma; C:cytosol; P:pollen development; C:Golgi apparatus; P:cell surface receptor signaling pathway; C:extracellular region; C:plant-type cell wall; F:binding; P:protein phosphorylation; C:plasma membrane; F:transmembrane receptor protein serine/threonine kinase activity	EC:2.7.11	Transferring phosphorus-containing groups
CotAD_33544	Leucine-rich repeat kinase family	658	20	0	60.9	6	F:GO:0005524; P:GO:0007169; C:GO:0005576; F:GO:0004674; P:GO:0006468; C:GO:0005886	F:ATP binding; P:transmembrane receptor protein tyrosine kinase signaling pathway; C:extracellular region; F:protein serine/threonine kinase activity; P:protein phosphorylation; C:plasma membrane	EC:2.7.11	Transferring phosphorus-containing groups
CotAD_33555	Leucine-rich repeat kinase family	765	20	0	62.05	9	F:GO:0005524; C:GO:0009507; P:GO:0010070; C:GO:0016020; P:GO:0007169; C:GO:0005576; F:GO:0004674; P:GO:0006468; C:GO:0071944	F:ATP binding; C:chloroplast; P:zygote asymmetric cell division; C:membrane; P:transmembrane receptor protein tyrosine kinase signaling pathway; C:extracellular region; F:protein serine/threonine kinase activity; P:protein phosphorylation; C:cell periphery	EC:2.7.11	Transferring phosphorus-containing groups
CotAD_33692	Leucine-rich repeat kinase family	940	20	0	70.45	8	F:GO:0005524; C:GO:0009507; C:GO:0016021; P:GO:0007169; C:GO:0005576; F:GO:0004674; P:GO:0006468; C:GO:0005886	F:ATP binding; C:chloroplast; C:integral component of membrane; P:transmembrane receptor protein tyrosine kinase signaling pathway; C:extracellular region; F:protein serine/threonine kinase activity; P:protein phosphorylation; C:plasma membrane	EC:2.7.11	Transferring phosphorus-containing groups
CotAD_33907	receptor kinase	1095	20	0	58.55	15	P:GO:0007169; P:GO:0000226; F:GO:0004674; P:GO:0006468; P:GO:0006952; C:GO:0009504; C:GO:0005886; P:GO:0044702; F:GO:0005524; P:GO:0003006; P:GO:0009617; C:GO:0005768; P:GO:0051179; C:GO:0016021; P:GO:0010103	P:transmembrane receptor protein tyrosine kinase signaling pathway; P:microtubule cytoskeleton organization; F:protein serine/threonine kinase activity; P:protein phosphorylation; P:defense response; C:cell plate; C:plasma membrane; P:single organism reproductive process; F:ATP binding; P:developmental process involved in reproduction; P:response to bacterium; C:endosome; P:localization; C:integr…	EC:2.7.11	Transferring phosphorus-containing groups
CotAD_33968	Leucine-rich receptor kinase family	861	20	0	56.4	9	C:GO:0009506; F:GO:0005515; P:GO:0048731; P:GO:0010183; F:GO:0016301; P:GO:0050789; C:GO:0005886; P:GO:0009888; C:GO:0090406	C:plasmodesma; F:protein binding; P:system development; P:pollen tube guidance; F:kinase activity; P:regulation of biological process; C:plasma membrane; P:tissue development; C:pollen tube
CotAD_34157	Leucine-rich repeat kinase family	863	20	0	57.7	12	P:GO:0002764; C:GO:0009507; F:GO:0005515; F:GO:0019199; P:GO:0010204; C:GO:0012505; P:GO:0016045; P:GO:0010359; P:GO:0016310; F:GO:0004674; P:GO:0009626; C:GO:0005886	P:immune response-regulating signaling pathway; C:chloroplast; F:protein binding; F:transmembrane receptor protein kinase activity; P:defense response signaling pathway, resistance gene-independent; C:endomembrane system; P:detection of bacterium; P:regulation of anion channel activity; P:phosphorylation; F:protein serine/threonine kinase activity; P:plant-type hypersensitive response; C:plasma m…	EC:2.7.11	Transferring phosphorus-containing groups
CotAD_34158	Leucine-rich repeat kinase family	1024	20	0	57.5	11	P:GO:0002764; C:GO:0009507; C:GO:0005768; F:GO:0005515; P:GO:0051179; F:GO:0019199; P:GO:0010204; P:GO:0016045; P:GO:0010359; P:GO:0009626; C:GO:0005886	P:immune response-regulating signaling pathway; C:chloroplast; C:endosome; F:protein binding; P:localization; F:transmembrane receptor protein kinase activity; P:defense response signaling pathway, resistance gene-independent; P:detection of bacterium; P:regulation of anion channel activity; P:plant-type hypersensitive response; C:plasma membrane	EC:2.7.11	Transferring phosphorus-containing groups
CotAD_34286	Leucine-rich receptor kinase family	997	20	0	58.95	20	P:GO:0007172; P:GO:0046777; C:GO:0000325; F:GO:0004674; P:GO:0009934; F:GO:0043621; C:GO:0005886; P:GO:0051301; P:GO:0045490; C:GO:0009506; P:GO:0001944; P:GO:0010468; P:GO:0030154; P:GO:0010227; P:GO:0010067; P:GO:0010089; F:GO:0033612; P:GO:0050896; P:GO:0010102; P:GO:0010223	P:signal complex assembly; P:protein autophosphorylation; C:plant-type vacuole; F:protein serine/threonine kinase activity; P:regulation of meristem structural organization; F:protein self-association; C:plasma membrane; P:cell division; P:pectin catabolic process; C:plasmodesma; P:vasculature development; P:regulation of gene expression; P:cell differentiation; P:floral organ abscission; P:proca…	EC:2.7.11	Transferring phosphorus-containing groups
CotAD_34384	Leucine-rich repeat kinase family	605	20	0	74.05	22	P:GO:0010152; F:GO:0042802; P:GO:0009793; P:GO:0007030; P:GO:0009556; P:GO:0007169; P:GO:0009742; P:GO:0046777; C:GO:0043234; P:GO:0042742; C:GO:0005886; F:GO:0004675; F:GO:0005524; C:GO:0005768; P:GO:0008219; F:GO:0046982; P:GO:0002229; C:GO:0016021; P:GO:0010227; P:GO:0050832; F:GO:0033612; P:GO:0016049	P:pollen maturation; F:identical protein binding; P:embryo development ending in seed dormancy; P:Golgi organization; P:microsporogenesis; P:transmembrane receptor protein tyrosine kinase signaling pathway; P:brassinosteroid mediated signaling pathway; P:protein autophosphorylation; C:protein complex; P:defense response to bacterium; C:plasma membrane; F:transmembrane receptor protein serine/thre…	EC:2.7.11	Transferring phosphorus-containing groups
CotAD_34684	somatic embryogenesis receptor-like kinase 5	597	20	0	84.3	29	P:GO:0009793; P:GO:0007030; P:GO:0009556; P:GO:0046777; P:GO:0060548; F:GO:0008289; C:GO:0005789; F:GO:0005524; P:GO:0008219; F:GO:0004714; F:GO:0046982; P:GO:0050832; F:GO:0033612; P:GO:0010152; F:GO:0042802; P:GO:1900140; P:GO:0010150; P:GO:0009742; P:GO:0007166; C:GO:0043234; P:GO:0042742; C:GO:0005886; F:GO:0004675; P:GO:0002229; C:GO:0016021; C:GO:0010008; P:GO:0010227; P:GO:0010200; P:GO:00…	P:embryo development ending in seed dormancy; P:Golgi organization; P:microsporogenesis; P:protein autophosphorylation; P:negative regulation of cell death; F:lipid binding; C:endoplasmic reticulum membrane; F:ATP binding; P:cell death; F:transmembrane receptor protein tyrosine kinase activity; F:protein heterodimerization activity; P:defense response to fungus; F:receptor serine/threonine kinase…	EC:2.7.10; EC:2.7.10.1; EC:2.7.11	Transferring phosphorus-containing groups; Receptor protein-tyrosine kinase; Transferring phosphorus-containing groups
CotAD_34685	somatic embryogenesis receptor-like kinase 5	538	20	0	77.25	27	P:GO:0009793; P:GO:0007030; P:GO:0009556; P:GO:0046777; P:GO:0060548; F:GO:0005524; P:GO:0008219; F:GO:0004714; F:GO:0046982; P:GO:0050832; F:GO:0033612; P:GO:0010152; F:GO:0042802; P:GO:1900140; P:GO:0010150; P:GO:0009742; P:GO:0007166; C:GO:0043234; P:GO:0042742; C:GO:0005886; F:GO:0004675; P:GO:0002229; C:GO:0016021; C:GO:0010008; P:GO:0010227; P:GO:0010200; P:GO:0016049	P:embryo development ending in seed dormancy; P:Golgi organization; P:microsporogenesis; P:protein autophosphorylation; P:negative regulation of cell death; F:ATP binding; P:cell death; F:transmembrane receptor protein tyrosine kinase activity; F:protein heterodimerization activity; P:defense response to fungus; F:receptor serine/threonine kinase binding; P:pollen maturation; F:identical protein …	EC:2.7.10; EC:2.7.10.1; EC:2.7.11	Transferring phosphorus-containing groups; Receptor protein-tyrosine kinase; Transferring phosphorus-containing groups
CotAD_34813	Leucine-rich receptor kinase family	977	20	0	59.1	23	P:GO:0007172; P:GO:1902025; P:GO:0010051; P:GO:0007169; P:GO:0046777; C:GO:0000325; P:GO:0009960; F:GO:0004674; P:GO:0009934; F:GO:0043621; P:GO:0009845; C:GO:0005886; F:GO:0005524; P:GO:0006979; P:GO:0045490; C:GO:0009506; P:GO:0010468; P:GO:0030154; F:GO:0017046; P:GO:0010227; F:GO:0033612; P:GO:0090548; P:GO:0010102	P:signal complex assembly; P:nitrate import; P:xylem and phloem pattern formation; P:transmembrane receptor protein tyrosine kinase signaling pathway; P:protein autophosphorylation; C:plant-type vacuole; P:endosperm development; F:protein serine/threonine kinase activity; P:regulation of meristem structural organization; F:protein self-association; P:seed germination; C:plasma membrane; F:ATP bin…	EC:2.7.11	Transferring phosphorus-containing groups
CotAD_34828	Leucine-rich receptor kinase family	1019	20	0	65.5	9	F:GO:0005524; F:GO:0005515; P:GO:0010082; P:GO:0010449; C:GO:0016021; P:GO:0007169; F:GO:0004674; P:GO:0006468; C:GO:0005886	F:ATP binding; F:protein binding; P:regulation of root meristem growth; P:root meristem growth; C:integral component of membrane; P:transmembrane receptor protein tyrosine kinase signaling pathway; F:protein serine/threonine kinase activity; P:protein phosphorylation; C:plasma membrane	EC:2.7.11	Transferring phosphorus-containing groups
CotAD_35034	Leucine-rich repeat kinase family	553	20	2.52e-166	56.25	5	F:GO:0005524; P:GO:0007169; F:GO:0004674; P:GO:0006468; C:GO:0005886	F:ATP binding; P:transmembrane receptor protein tyrosine kinase signaling pathway; F:protein serine/threonine kinase activity; P:protein phosphorylation; C:plasma membrane	EC:2.7.11	Transferring phosphorus-containing groups
CotAD_35146	Leucine-rich repeat kinase family	1343	20	0	69	8	F:GO:0005524; C:GO:0009507; C:GO:0016021; P:GO:0007169; C:GO:0005576; F:GO:0004674; P:GO:0006468; C:GO:0005886	F:ATP binding; C:chloroplast; C:integral component of membrane; P:transmembrane receptor protein tyrosine kinase signaling pathway; C:extracellular region; F:protein serine/threonine kinase activity; P:protein phosphorylation; C:plasma membrane	EC:2.7.11	Transferring phosphorus-containing groups
CotAD_35956	Leucine-rich repeat kinase family	636	20	0	64.05	13	P:GO:0007169; P:GO:0009610; C:GO:0005576; C:GO:0005774; C:GO:0009505; F:GO:0004674; P:GO:0006468; C:GO:0046658; F:GO:0005524; C:GO:0009506; P:GO:0009737; P:GO:2000605; C:GO:0005829	P:transmembrane receptor protein tyrosine kinase signaling pathway; P:response to symbiotic fungus; C:extracellular region; C:vacuolar membrane; C:plant-type cell wall; F:protein serine/threonine kinase activity; P:protein phosphorylation; C:anchored component of plasma membrane; F:ATP binding; C:plasmodesma; P:response to abscisic acid; P:positive regulation of secondary growth; C:cytosol	EC:2.7.11	Transferring phosphorus-containing groups
CotAD_36059	Leucine-rich receptor kinase family	662	20	0	67.15	21	P:GO:1902025; P:GO:0010051; P:GO:0010183; P:GO:0007169; P:GO:0046777; P:GO:0009960; F:GO:0004674; P:GO:0009845; C:GO:0005886; F:GO:0005524; P:GO:0006979; P:GO:0045490; F:GO:0005515; P:GO:0001944; C:GO:0016021; P:GO:0010468; F:GO:0017046; P:GO:0010227; P:GO:0090548; C:GO:0090406; P:GO:0010102	P:nitrate import; P:xylem and phloem pattern formation; P:pollen tube guidance; P:transmembrane receptor protein tyrosine kinase signaling pathway; P:protein autophosphorylation; P:endosperm development; F:protein serine/threonine kinase activity; P:seed germination; C:plasma membrane; F:ATP binding; P:response to oxidative stress; P:pectin catabolic process; F:protein binding; P:vasculature deve…	EC:2.7.11	Transferring phosphorus-containing groups
CotAD_36211	Leucine-rich repeat kinase family	920	20	0	61.3	11	C:GO:0009506; F:GO:0097159; C:GO:0005829; P:GO:0009555; C:GO:0005794; P:GO:0007166; C:GO:0005576; C:GO:0009505; P:GO:0006468; C:GO:0005886; F:GO:0004675	C:plasmodesma; F:organic cyclic compound binding; C:cytosol; P:pollen development; C:Golgi apparatus; P:cell surface receptor signaling pathway; C:extracellular region; C:plant-type cell wall; P:protein phosphorylation; C:plasma membrane; F:transmembrane receptor protein serine/threonine kinase activity	EC:2.7.11	Transferring phosphorus-containing groups
CotAD_36271	Leucine-rich repeat kinase family	765	20	0	57.15	9	F:GO:0005524; P:GO:0003006; P:GO:0007275; C:GO:0005739; P:GO:0007169; F:GO:0004674; P:GO:0006468; C:GO:0005886; P:GO:0044702	F:ATP binding; P:developmental process involved in reproduction; P:multicellular organism development; C:mitochondrion; P:transmembrane receptor protein tyrosine kinase signaling pathway; F:protein serine/threonine kinase activity; P:protein phosphorylation; C:plasma membrane; P:single organism reproductive process	EC:2.7.11	Transferring phosphorus-containing groups
CotAD_36318	Leucine-rich repeat kinase family	909	20	0	58.6	8	C:GO:0009507; C:GO:0009506; P:GO:0007165; P:GO:0009555; C:GO:0005794; C:GO:0009505; C:GO:0005886; F:GO:0004675	C:chloroplast; C:plasmodesma; P:signal transduction; P:pollen development; C:Golgi apparatus; C:plant-type cell wall; C:plasma membrane; F:transmembrane receptor protein serine/threonine kinase activity	EC:2.7.11	Transferring phosphorus-containing groups
CotAD_36657	receptor kinase	986	20	0	59.1	10	P:GO:0002764; C:GO:0009507; F:GO:0005515; F:GO:0019199; P:GO:0010204; P:GO:0016045; P:GO:0010359; P:GO:0016310; P:GO:0009626; C:GO:0005886	P:immune response-regulating signaling pathway; C:chloroplast; F:protein binding; F:transmembrane receptor protein kinase activity; P:defense response signaling pathway, resistance gene-independent; P:detection of bacterium; P:regulation of anion channel activity; P:phosphorylation; P:plant-type hypersensitive response; C:plasma membrane	EC:2.7.11	Transferring phosphorus-containing groups
CotAD_36658	Leucine-rich repeat kinase family	968	20	0	55.6	11	P:GO:0002764; C:GO:0009507; C:GO:0005768; F:GO:0005515; P:GO:0051179; F:GO:0019199; P:GO:0010204; P:GO:0016045; P:GO:0010359; P:GO:0009626; C:GO:0005886	P:immune response-regulating signaling pathway; C:chloroplast; C:endosome; F:protein binding; P:localization; F:transmembrane receptor protein kinase activity; P:defense response signaling pathway, resistance gene-independent; P:detection of bacterium; P:regulation of anion channel activity; P:plant-type hypersensitive response; C:plasma membrane	EC:2.7.11	Transferring phosphorus-containing groups
CotAD_36659	receptor kinase	1069	20	0	54.25	11	C:GO:0009507; P:GO:0009617; P:GO:0007165; C:GO:0012505; P:GO:0033554; F:GO:0004672; F:GO:0005488; P:GO:0006952; C:GO:0005886; P:GO:0002376; P:GO:0050776	C:chloroplast; P:response to bacterium; P:signal transduction; C:endomembrane system; P:cellular response to stress; F:protein kinase activity; F:binding; P:defense response; C:plasma membrane; P:immune system process; P:regulation of immune response
CotAD_36660	Leucine-rich repeat kinase family	1037	20	0	58.85	10	P:GO:0002764; C:GO:0009507; F:GO:0005515; F:GO:0019199; P:GO:0010204; P:GO:0016045; P:GO:0010359; P:GO:0016310; P:GO:0009626; C:GO:0005886	P:immune response-regulating signaling pathway; C:chloroplast; F:protein binding; F:transmembrane receptor protein kinase activity; P:defense response signaling pathway, resistance gene-independent; P:detection of bacterium; P:regulation of anion channel activity; P:phosphorylation; P:plant-type hypersensitive response; C:plasma membrane	EC:2.7.11	Transferring phosphorus-containing groups
CotAD_36664	Leucine-rich repeat kinase family	1037	20	0	58.3	10	P:GO:0002764; C:GO:0009507; F:GO:0005515; P:GO:0010204; F:GO:0004672; P:GO:0016045; P:GO:0010359; P:GO:0016310; P:GO:0009626; C:GO:0005886	P:immune response-regulating signaling pathway; C:chloroplast; F:protein binding; P:defense response signaling pathway, resistance gene-independent; F:protein kinase activity; P:detection of bacterium; P:regulation of anion channel activity; P:phosphorylation; P:plant-type hypersensitive response; C:plasma membrane
CotAD_37063	Leucine-rich receptor kinase family	1060	20	0	56.2	10	P:GO:1901529; F:GO:0005524; P:GO:1901528; F:GO:0005515; C:GO:0005829; P:GO:0007169; F:GO:0004674; P:GO:0006468; C:GO:0005886; P:GO:1901527	P:positive regulation of anion channel activity; F:ATP binding; P:hydrogen peroxide mediated signaling pathway involved in stomatal movement; F:protein binding; C:cytosol; P:transmembrane receptor protein tyrosine kinase signaling pathway; F:protein serine/threonine kinase activity; P:protein phosphorylation; C:plasma membrane; P:abscisic acid-activated signaling pathway involved in stomatal move…	EC:2.7.11	Transferring phosphorus-containing groups
CotAD_37125	Leucine-rich receptor kinase family	1012	20	0	65.75	23	P:GO:0010075; P:GO:0007172; P:GO:0010183; P:GO:0007169; P:GO:0046777; P:GO:0048437; C:GO:0000325; P:GO:0009934; F:GO:0043621; C:GO:0005886; P:GO:0048364; P:GO:0051301; F:GO:0005524; F:GO:0004702; C:GO:0009506; P:GO:0001944; C:GO:0016021; P:GO:0030154; P:GO:0010067; P:GO:0010089; F:GO:0033612; C:GO:0090406; P:GO:0010223	P:regulation of meristem growth; P:signal complex assembly; P:pollen tube guidance; P:transmembrane receptor protein tyrosine kinase signaling pathway; P:protein autophosphorylation; P:floral organ development; C:plant-type vacuole; P:regulation of meristem structural organization; F:protein self-association; C:plasma membrane; P:root development; P:cell division; F:ATP binding; F:signal transduc…	EC:2.7.11	Transferring phosphorus-containing groups
CotAD_37176	receptor kinase	1051	20	0	59.6	17	P:GO:0007275; P:GO:0009611; F:GO:0004383; P:GO:0007169; P:GO:0045851; F:GO:0004674; P:GO:0006468; C:GO:0005886; F:GO:0001653; F:GO:0005524; C:GO:0009507; P:GO:0009826; F:GO:0004888; F:GO:0005515; P:GO:0045087; C:GO:0016021; P:GO:0031347	P:multicellular organism development; P:response to wounding; F:guanylate cyclase activity; P:transmembrane receptor protein tyrosine kinase signaling pathway; P:pH reduction; F:protein serine/threonine kinase activity; P:protein phosphorylation; C:plasma membrane; F:peptide receptor activity; F:ATP binding; C:chloroplast; P:unidimensional cell growth; F:transmembrane signaling receptor activity;…	EC:2.7.11; EC:4.6.1.2	Transferring phosphorus-containing groups; Guanylate cyclase
CotAD_37346	Leucine-rich repeat kinase family	649	20	0	62.1	5	F:GO:0005524; P:GO:0007169; F:GO:0004674; P:GO:0006468; C:GO:0005886	F:ATP binding; P:transmembrane receptor protein tyrosine kinase signaling pathway; F:protein serine/threonine kinase activity; P:protein phosphorylation; C:plasma membrane	EC:2.7.11	Transferring phosphorus-containing groups
CotAD_37359	Leucine-rich repeat kinase family	1012	20	0	56.85	10	P:GO:0002764; C:GO:0009507; F:GO:0005515; P:GO:0010204; P:GO:0048856; F:GO:0004672; P:GO:0016045; P:GO:0010359; P:GO:0009626; C:GO:0005886	P:immune response-regulating signaling pathway; C:chloroplast; F:protein binding; P:defense response signaling pathway, resistance gene-independent; P:anatomical structure development; F:protein kinase activity; P:detection of bacterium; P:regulation of anion channel activity; P:plant-type hypersensitive response; C:plasma membrane
CotAD_37427	Leucine-rich repeat kinase family	886	20	0	62.75	8	F:GO:0005524; P:GO:0048367; P:GO:0009791; C:GO:0016021; P:GO:0007169; F:GO:0004674; P:GO:0006468; C:GO:0005886	F:ATP binding; P:shoot system development; P:post-embryonic development; C:integral component of membrane; P:transmembrane receptor protein tyrosine kinase signaling pathway; F:protein serine/threonine kinase activity; P:protein phosphorylation; C:plasma membrane	EC:2.7.11	Transferring phosphorus-containing groups
CotAD_37459	Leucine-rich repeat kinase family	875	20	0	66.4	8	F:GO:0005524; C:GO:0016021; P:GO:0007169; C:GO:0005576; F:GO:0004674; P:GO:0006468; C:GO:0005773; C:GO:0005886	F:ATP binding; C:integral component of membrane; P:transmembrane receptor protein tyrosine kinase signaling pathway; C:extracellular region; F:protein serine/threonine kinase activity; P:protein phosphorylation; C:vacuole; C:plasma membrane	EC:2.7.11	Transferring phosphorus-containing groups
CotAD_38001	Leucine-rich repeat kinase family	902	20	0	56.55	9	F:GO:0005524; C:GO:0009506; P:GO:0048731; P:GO:0009791; P:GO:0007169; C:GO:0009505; F:GO:0004674; P:GO:0006468; C:GO:0005886	F:ATP binding; C:plasmodesma; P:system development; P:post-embryonic development; P:transmembrane receptor protein tyrosine kinase signaling pathway; C:plant-type cell wall; F:protein serine/threonine kinase activity; P:protein phosphorylation; C:plasma membrane	EC:2.7.11	Transferring phosphorus-containing groups
CotAD_38523	Leucine-rich receptor kinase family	1054	20	0	58.95	16	P:GO:0048608; P:GO:0048229; P:GO:0007169; P:GO:0000226; F:GO:0004674; P:GO:0006468; P:GO:0006952; C:GO:0009504; C:GO:0005886; P:GO:0044702; F:GO:0005524; P:GO:0009617; C:GO:0005768; P:GO:0051179; C:GO:0016021; P:GO:0010103	P:reproductive structure development; P:gametophyte development; P:transmembrane receptor protein tyrosine kinase signaling pathway; P:microtubule cytoskeleton organization; F:protein serine/threonine kinase activity; P:protein phosphorylation; P:defense response; C:cell plate; C:plasma membrane; P:single organism reproductive process; F:ATP binding; P:response to bacterium; C:endosome; P:localiz…	EC:2.7.11	Transferring phosphorus-containing groups
CotAD_38709	Leucine-rich receptor kinase family	984	20	0	54.95	13	P:GO:0007169; F:GO:0004674; P:GO:0006468; P:GO:0006952; C:GO:0005886; P:GO:0002376; F:GO:0005524; P:GO:0009617; C:GO:0005768; P:GO:0051179; C:GO:0016021; P:GO:0033554; P:GO:0050776	P:transmembrane receptor protein tyrosine kinase signaling pathway; F:protein serine/threonine kinase activity; P:protein phosphorylation; P:defense response; C:plasma membrane; P:immune system process; F:ATP binding; P:response to bacterium; C:endosome; P:localization; C:integral component of membrane; P:cellular response to stress; P:regulation of immune response	EC:2.7.11	Transferring phosphorus-containing groups
CotAD_39199	Leucine-rich receptor kinase family	1021	20	0	59.8	23	P:GO:0010075; P:GO:0007172; P:GO:0010183; P:GO:0007169; P:GO:0046777; P:GO:0048437; C:GO:0000325; F:GO:0004674; P:GO:0009934; F:GO:0043621; C:GO:0005886; P:GO:0048364; P:GO:0051301; F:GO:0005524; C:GO:0009506; P:GO:0001944; C:GO:0016021; P:GO:0030154; P:GO:0010067; P:GO:0010089; F:GO:0033612; C:GO:0090406; P:GO:0010223	P:regulation of meristem growth; P:signal complex assembly; P:pollen tube guidance; P:transmembrane receptor protein tyrosine kinase signaling pathway; P:protein autophosphorylation; P:floral organ development; C:plant-type vacuole; F:protein serine/threonine kinase activity; P:regulation of meristem structural organization; F:protein self-association; C:plasma membrane; P:root development; P:cel…	EC:2.7.11	Transferring phosphorus-containing groups
CotAD_39293	leucine-rich repeat receptor	1194	20	0	74.35	24	P:GO:1900140; F:GO:0042803; P:GO:0009742; P:GO:0048657; P:GO:0060548; C:GO:0043234; F:GO:0005496; F:GO:0004674; P:GO:0009911; C:GO:0005886; P:GO:0009734; P:GO:0009729; F:GO:0005524; P:GO:0009826; F:GO:0004714; F:GO:0046982; P:GO:0048366; C:GO:0016021; C:GO:0010008; P:GO:0010305; P:GO:0010233; P:GO:0010584; P:GO:0010224; P:GO:0010268	P:regulation of seedling development; F:protein homodimerization activity; P:brassinosteroid mediated signaling pathway; P:anther wall tapetum cell differentiation; P:negative regulation of cell death; C:protein complex; F:steroid binding; F:protein serine/threonine kinase activity; P:positive regulation of flower development; C:plasma membrane; P:auxin-activated signaling pathway; P:detection of…	EC:2.7.10; EC:2.7.10.1; EC:2.7.11	Transferring phosphorus-containing groups; Receptor protein-tyrosine kinase; Transferring phosphorus-containing groups
CotAD_39917	somatic embryogenesis receptor-like kinase 5	627	20	0	85.9	29	P:GO:0009793; P:GO:0007030; P:GO:0009556; P:GO:0046777; P:GO:0060548; F:GO:0008289; C:GO:0005789; F:GO:0005524; P:GO:0008219; F:GO:0004714; F:GO:0046982; P:GO:0050832; F:GO:0033612; P:GO:0010152; F:GO:0042802; P:GO:1900140; P:GO:0010150; P:GO:0009742; P:GO:0007166; C:GO:0043234; P:GO:0042742; C:GO:0005886; F:GO:0004675; P:GO:0002229; C:GO:0016021; C:GO:0010008; P:GO:0010227; P:GO:0010200; P:GO:00…	P:embryo development ending in seed dormancy; P:Golgi organization; P:microsporogenesis; P:protein autophosphorylation; P:negative regulation of cell death; F:lipid binding; C:endoplasmic reticulum membrane; F:ATP binding; P:cell death; F:transmembrane receptor protein tyrosine kinase activity; F:protein heterodimerization activity; P:defense response to fungus; F:receptor serine/threonine kinase…	EC:2.7.10; EC:2.7.10.1; EC:2.7.11	Transferring phosphorus-containing groups; Receptor protein-tyrosine kinase; Transferring phosphorus-containing groups
CotAD_39964	Leucine-rich receptor kinase family	1829	20	0	60.2	12	F:GO:0005524; P:GO:0090558; F:GO:0005515; P:GO:0010082; P:GO:0009793; P:GO:0010449; P:GO:0007169; P:GO:0009553; F:GO:0004674; P:GO:0006468; C:GO:0005886; P:GO:0006950	F:ATP binding; P:plant epidermis development; F:protein binding; P:regulation of root meristem growth; P:embryo development ending in seed dormancy; P:root meristem growth; P:transmembrane receptor protein tyrosine kinase signaling pathway; P:embryo sac development; F:protein serine/threonine kinase activity; P:protein phosphorylation; C:plasma membrane; P:response to stress	EC:2.7.11	Transferring phosphorus-containing groups
CotAD_40381	Leucine-rich repeat transmembrane kinase	1097	20	0	70.75	5	F:GO:0005524; C:GO:0009506; F:GO:0004672; P:GO:0016310; C:GO:0005886	F:ATP binding; C:plasmodesma; F:protein kinase activity; P:phosphorylation; C:plasma membrane
CotAD_40450	Leucine-rich receptor kinase family	996	20	0	64.2	23	P:GO:0010075; P:GO:0007172; P:GO:0010183; P:GO:0007169; P:GO:0046777; P:GO:0048437; C:GO:0000325; P:GO:0009934; F:GO:0043621; C:GO:0005886; P:GO:0048364; P:GO:0051301; F:GO:0005524; F:GO:0004702; C:GO:0009506; P:GO:0001944; C:GO:0016021; P:GO:0030154; P:GO:0010067; P:GO:0010089; F:GO:0033612; C:GO:0090406; P:GO:0010223	P:regulation of meristem growth; P:signal complex assembly; P:pollen tube guidance; P:transmembrane receptor protein tyrosine kinase signaling pathway; P:protein autophosphorylation; P:floral organ development; C:plant-type vacuole; P:regulation of meristem structural organization; F:protein self-association; C:plasma membrane; P:root development; P:cell division; F:ATP binding; F:signal transduc…	EC:2.7.11	Transferring phosphorus-containing groups
CotAD_40621	Leucine-rich receptor kinase family	1146	20	0	62.55	16	P:GO:0090558; P:GO:0010082; P:GO:0009793; P:GO:0009611; P:GO:0007169; P:GO:0009753; F:GO:0042277; P:GO:0009553; F:GO:0004674; P:GO:0006468; P:GO:0042742; C:GO:0005886; F:GO:0005524; F:GO:0005515; P:GO:0010449; C:GO:0016021	P:plant epidermis development; P:regulation of root meristem growth; P:embryo development ending in seed dormancy; P:response to wounding; P:transmembrane receptor protein tyrosine kinase signaling pathway; P:response to jasmonic acid; F:peptide binding; P:embryo sac development; F:protein serine/threonine kinase activity; P:protein phosphorylation; P:defense response to bacterium; C:plasma membr…	EC:2.7.11	Transferring phosphorus-containing groups
CotAD_41028	receptor kinase	1071	20	0	52.4	13	P:GO:0007165; P:GO:0007275; F:GO:0004672; F:GO:0005488; P:GO:0006952; P:GO:0002376; C:GO:0009507; P:GO:0009617; C:GO:0005768; P:GO:0051179; C:GO:0016020; P:GO:0033554; P:GO:0050776	P:signal transduction; P:multicellular organism development; F:protein kinase activity; F:binding; P:defense response; P:immune system process; C:chloroplast; P:response to bacterium; C:endosome; P:localization; C:membrane; P:cellular response to stress; P:regulation of immune response
CotAD_41031	receptor kinase	1307	20	2.02e-178	52.15	12	P:GO:0009617; C:GO:0005768; P:GO:0051179; P:GO:0007165; P:GO:0007275; C:GO:0016020; P:GO:0033554; F:GO:0004672; F:GO:0005488; P:GO:0006952; P:GO:0002376; P:GO:0050776	P:response to bacterium; C:endosome; P:localization; P:signal transduction; P:multicellular organism development; C:membrane; P:cellular response to stress; F:protein kinase activity; F:binding; P:defense response; P:immune system process; P:regulation of immune response
CotAD_41057	Leucine-rich repeat kinase family	606	20	0	66.25	14	P:GO:0007169; P:GO:0009610; C:GO:0005576; C:GO:0005774; C:GO:0009505; F:GO:0004674; P:GO:0006468; C:GO:0046658; F:GO:0005524; C:GO:0009506; P:GO:0009737; C:GO:0005739; P:GO:2000605; C:GO:0005829	P:transmembrane receptor protein tyrosine kinase signaling pathway; P:response to symbiotic fungus; C:extracellular region; C:vacuolar membrane; C:plant-type cell wall; F:protein serine/threonine kinase activity; P:protein phosphorylation; C:anchored component of plasma membrane; F:ATP binding; C:plasmodesma; P:response to abscisic acid; C:mitochondrion; P:positive regulation of secondary growth;…	EC:2.7.11	Transferring phosphorus-containing groups
CotAD_41205	Leucine-rich repeat kinase family	619	20	6.14e-95	50.45	4	P:GO:0007165; C:GO:0016020; C:GO:0044464; F:GO:0004672	P:signal transduction; C:membrane; C:cell part; F:protein kinase activity
CotAD_41214	Leucine-rich repeat kinase family	922	20	0	51.95	11	P:GO:0009617; C:GO:0005768; P:GO:0051179; P:GO:0007165; C:GO:0016020; P:GO:0033554; F:GO:0004672; F:GO:0005488; P:GO:0006952; P:GO:0002376; P:GO:0050776	P:response to bacterium; C:endosome; P:localization; P:signal transduction; C:membrane; P:cellular response to stress; F:protein kinase activity; F:binding; P:defense response; P:immune system process; P:regulation of immune response
CotAD_41216	Leucine-rich repeat kinase family	642	20	3.96e-79	56.55	13	P:GO:0009626; P:GO:0006898; P:GO:0042742; C:GO:0005886; P:GO:0052544; P:GO:0002764; C:GO:0009507; C:GO:0005768; F:GO:0005515; F:GO:0019199; P:GO:0010204; P:GO:0016045; P:GO:0010359	P:plant-type hypersensitive response; P:receptor-mediated endocytosis; P:defense response to bacterium; C:plasma membrane; P:defense response by callose deposition in cell wall; P:immune response-regulating signaling pathway; C:chloroplast; C:endosome; F:protein binding; F:transmembrane receptor protein kinase activity; P:defense response signaling pathway, resistance gene-independent; P:detectio…	EC:2.7.11	Transferring phosphorus-containing groups
CotAD_41227	Leucine-rich receptor kinase family	991	20	0	71.8	9	F:GO:0005524; C:GO:0016021; P:GO:0009553; C:GO:0005576; F:GO:0004674; P:GO:0006468; P:GO:0048481; C:GO:0005886; P:GO:0010103	F:ATP binding; C:integral component of membrane; P:embryo sac development; C:extracellular region; F:protein serine/threonine kinase activity; P:protein phosphorylation; P:plant ovule development; C:plasma membrane; P:stomatal complex morphogenesis	EC:2.7.11	Transferring phosphorus-containing groups
CotAD_41669	Leucine-rich repeat kinase family	598	20	0	67.95	14	P:GO:0007169; P:GO:0009664; F:GO:0004674; P:GO:0006468; C:GO:0005886; P:GO:0098542; F:GO:0005524; P:GO:0009826; C:GO:0005768; F:GO:0005515; P:GO:0048367; P:GO:0048354; C:GO:0016021; P:GO:0030244	P:transmembrane receptor protein tyrosine kinase signaling pathway; P:plant-type cell wall organization; F:protein serine/threonine kinase activity; P:protein phosphorylation; C:plasma membrane; P:defense response to other organism; F:ATP binding; P:unidimensional cell growth; C:endosome; F:protein binding; P:shoot system development; P:mucilage biosynthetic process involved in seed coat developm…	EC:2.7.11	Transferring phosphorus-containing groups
CotAD_41732	Leucine-rich repeat kinase family	874	20	0	65.9	8	C:GO:0009506; F:GO:0004672; P:GO:0016310; P:GO:0050832; P:GO:0042742; C:GO:0005886; C:GO:0090406; P:GO:0009788	C:plasmodesma; F:protein kinase activity; P:phosphorylation; P:defense response to fungus; P:defense response to bacterium; C:plasma membrane; C:pollen tube; P:negative regulation of abscisic acid-activated signaling pathway
CotAD_42146	Leucine-rich repeat kinase family	594	20	0	71.5	25	P:GO:0009793; P:GO:0007030; P:GO:0009556; P:GO:0006468; F:GO:0005524; P:GO:0009826; C:GO:0005768; P:GO:0008219; F:GO:0046982; P:GO:0030244; P:GO:0050832; F:GO:0033612; P:GO:0010152; F:GO:0042802; P:GO:0007169; P:GO:0009742; P:GO:0009664; C:GO:0043234; P:GO:0042742; C:GO:0005886; F:GO:0004675; P:GO:0002229; P:GO:0048354; C:GO:0016021; P:GO:0010227	P:embryo development ending in seed dormancy; P:Golgi organization; P:microsporogenesis; P:protein phosphorylation; F:ATP binding; P:unidimensional cell growth; C:endosome; P:cell death; F:protein heterodimerization activity; P:cellulose biosynthetic process; P:defense response to fungus; F:receptor serine/threonine kinase binding; P:pollen maturation; F:identical protein binding; P:transmembrane…	EC:2.7.11	Transferring phosphorus-containing groups
CotAD_42374	Leucine-rich receptor kinase family	980	20	0	64.3	22	P:GO:0010075; P:GO:0007172; P:GO:0010183; P:GO:0007169; P:GO:0046777; P:GO:0048437; C:GO:0000325; P:GO:0009934; F:GO:0043621; C:GO:0005886; P:GO:0051301; F:GO:0005524; F:GO:0004702; C:GO:0009506; P:GO:0001944; C:GO:0016021; P:GO:0030154; P:GO:0010067; P:GO:0010089; F:GO:0033612; C:GO:0090406; P:GO:0010223	P:regulation of meristem growth; P:signal complex assembly; P:pollen tube guidance; P:transmembrane receptor protein tyrosine kinase signaling pathway; P:protein autophosphorylation; P:floral organ development; C:plant-type vacuole; P:regulation of meristem structural organization; F:protein self-association; C:plasma membrane; P:cell division; F:ATP binding; F:signal transducer, downstream of re…	EC:2.7.11	Transferring phosphorus-containing groups
CotAD_42787	Leucine-rich repeat kinase family	651	20	0	54.35	5	F:GO:0005524; P:GO:0007169; F:GO:0004674; P:GO:0006468; C:GO:0005886	F:ATP binding; P:transmembrane receptor protein tyrosine kinase signaling pathway; F:protein serine/threonine kinase activity; P:protein phosphorylation; C:plasma membrane	EC:2.7.11	Transferring phosphorus-containing groups
CotAD_43293	Leucine-rich repeat kinase family	885	20	0	57.75	10	P:GO:0048364; F:GO:0005524; F:GO:0004714; C:GO:0016021; P:GO:0007169; P:GO:0009653; F:GO:0004674; P:GO:0006468; P:GO:0048507; C:GO:0005886	P:root development; F:ATP binding; F:transmembrane receptor protein tyrosine kinase activity; C:integral component of membrane; P:transmembrane receptor protein tyrosine kinase signaling pathway; P:anatomical structure morphogenesis; F:protein serine/threonine kinase activity; P:protein phosphorylation; P:meristem development; C:plasma membrane	EC:2.7.10; EC:2.7.10.1; EC:2.7.11	Transferring phosphorus-containing groups; Receptor protein-tyrosine kinase; Transferring phosphorus-containing groups
CotAD_43408	Leucine-rich repeat kinase family	674	20	0	63.4	16	P:GO:0009860; P:GO:0007169; P:GO:0042221; C:GO:0005576; F:GO:0004674; P:GO:0006468; P:GO:0009846; F:GO:0005524; F:GO:0005515; P:GO:0009605; C:GO:0005737; C:GO:0005618; C:GO:0016324; C:GO:0031224; C:GO:0090406; P:GO:0080092	P:pollen tube growth; P:transmembrane receptor protein tyrosine kinase signaling pathway; P:response to chemical; C:extracellular region; F:protein serine/threonine kinase activity; P:protein phosphorylation; P:pollen germination; F:ATP binding; F:protein binding; P:response to external stimulus; C:cytoplasm; C:cell wall; C:apical plasma membrane; C:intrinsic component of membrane; C:pollen tube;…	EC:2.7.11	Transferring phosphorus-containing groups
CotAD_43554	Leucine-rich repeat kinase family	1013	20	0	53.05	11	P:GO:0009617; C:GO:0005768; P:GO:0051179; P:GO:0007165; P:GO:0033554; F:GO:0004672; F:GO:0005488; P:GO:0006952; C:GO:0005886; P:GO:0002376; P:GO:0050776	P:response to bacterium; C:endosome; P:localization; P:signal transduction; P:cellular response to stress; F:protein kinase activity; F:binding; P:defense response; C:plasma membrane; P:immune system process; P:regulation of immune response
CotAD_44030	Leucine-rich repeat kinase family	888	20	0	58.2	11	P:GO:0048364; F:GO:0005524; F:GO:0004714; P:GO:0009793; C:GO:0016021; P:GO:0007169; P:GO:0009653; F:GO:0004674; P:GO:0006468; P:GO:0048507; C:GO:0005886	P:root development; F:ATP binding; F:transmembrane receptor protein tyrosine kinase activity; P:embryo development ending in seed dormancy; C:integral component of membrane; P:transmembrane receptor protein tyrosine kinase signaling pathway; P:anatomical structure morphogenesis; F:protein serine/threonine kinase activity; P:protein phosphorylation; P:meristem development; C:plasma membrane	EC:2.7.10; EC:2.7.10.1; EC:2.7.11	Transferring phosphorus-containing groups; Receptor protein-tyrosine kinase; Transferring phosphorus-containing groups
CotAD_44233	Leucine-rich repeat kinase family	931	20	0	65.6	5	C:GO:0009506; F:GO:0004672; P:GO:0016310; C:GO:0005576; C:GO:0005886	C:plasmodesma; F:protein kinase activity; P:phosphorylation; C:extracellular region; C:plasma membrane
CotAD_44246	Leucine-rich repeat kinase family	615	20	0	64.05	13	P:GO:0007169; P:GO:0009610; C:GO:0005576; C:GO:0005774; C:GO:0009505; F:GO:0004674; P:GO:0006468; C:GO:0046658; F:GO:0005524; C:GO:0009506; P:GO:0009737; C:GO:0005739; P:GO:2000605	P:transmembrane receptor protein tyrosine kinase signaling pathway; P:response to symbiotic fungus; C:extracellular region; C:vacuolar membrane; C:plant-type cell wall; F:protein serine/threonine kinase activity; P:protein phosphorylation; C:anchored component of plasma membrane; F:ATP binding; C:plasmodesma; P:response to abscisic acid; C:mitochondrion; P:positive regulation of secondary growth	EC:2.7.11	Transferring phosphorus-containing groups
CotAD_44505	Leucine-rich receptor kinase family	1878	20	0	63.8	22	P:GO:0010075; P:GO:0007172; P:GO:0010183; P:GO:0007169; P:GO:0046777; P:GO:0048437; C:GO:0000325; P:GO:0009934; F:GO:0043621; C:GO:0005886; P:GO:0051301; F:GO:0005524; F:GO:0004702; C:GO:0009506; P:GO:0001944; C:GO:0016021; P:GO:0030154; P:GO:0010067; P:GO:0010089; F:GO:0033612; C:GO:0090406; P:GO:0010223	P:regulation of meristem growth; P:signal complex assembly; P:pollen tube guidance; P:transmembrane receptor protein tyrosine kinase signaling pathway; P:protein autophosphorylation; P:floral organ development; C:plant-type vacuole; P:regulation of meristem structural organization; F:protein self-association; C:plasma membrane; P:cell division; F:ATP binding; F:signal transducer, downstream of re…	EC:2.7.11	Transferring phosphorus-containing groups
CotAD_44689	Leucine-rich repeat kinase family	928	20	0	58.5	10	P:GO:0002764; C:GO:0009507; F:GO:0005515; P:GO:0007275; P:GO:0010204; F:GO:0004672; P:GO:0016045; P:GO:0010359; P:GO:0009626; C:GO:0005886	P:immune response-regulating signaling pathway; C:chloroplast; F:protein binding; P:multicellular organism development; P:defense response signaling pathway, resistance gene-independent; F:protein kinase activity; P:detection of bacterium; P:regulation of anion channel activity; P:plant-type hypersensitive response; C:plasma membrane
CotAD_44726	leucine-rich repeat receptor	1132	20	0	55.55	19	P:GO:0010152; P:GO:0009651; P:GO:0010073; P:GO:0051260; P:GO:0007169; P:GO:0006468; P:GO:0009846; P:GO:0009945; P:GO:0048508; C:GO:0005886; P:GO:0009414; P:GO:0009942; C:GO:0005777; F:GO:0005524; P:GO:0009409; F:GO:0004702; P:GO:0009738; P:GO:0048653; P:GO:0009808	P:pollen maturation; P:response to salt stress; P:meristem maintenance; P:protein homooligomerization; P:transmembrane receptor protein tyrosine kinase signaling pathway; P:protein phosphorylation; P:pollen germination; P:radial axis specification; P:embryonic meristem development; C:plasma membrane; P:response to water deprivation; P:longitudinal axis specification; C:peroxisome; F:ATP binding; …	EC:2.7.11	Transferring phosphorus-containing groups
CotAD_44784	Leucine-rich repeat kinase family	905	20	0	54.3	5	F:GO:0005524; C:GO:0016021; F:GO:0004674; P:GO:0006468; C:GO:0005886	F:ATP binding; C:integral component of membrane; F:protein serine/threonine kinase activity; P:protein phosphorylation; C:plasma membrane	EC:2.7.11	Transferring phosphorus-containing groups
CotAD_44808	Leucine-rich receptor kinase family	1145	20	0	68.75	10	F:GO:0005524; F:GO:0005515; P:GO:0010082; P:GO:0010449; C:GO:0016021; P:GO:0016032; P:GO:0007169; F:GO:0004674; P:GO:0006468; C:GO:0005886	F:ATP binding; F:protein binding; P:regulation of root meristem growth; P:root meristem growth; C:integral component of membrane; P:viral process; P:transmembrane receptor protein tyrosine kinase signaling pathway; F:protein serine/threonine kinase activity; P:protein phosphorylation; C:plasma membrane	EC:2.7.11	Transferring phosphorus-containing groups
CotAD_45027	Leucine-rich repeat kinase family	606	20	0	64.35	13	P:GO:0007169; P:GO:0009610; C:GO:0005774; C:GO:0009505; F:GO:0004674; P:GO:0006468; C:GO:0046658; F:GO:0005524; C:GO:0009506; P:GO:0009737; C:GO:0005739; P:GO:2000605; C:GO:0016021	P:transmembrane receptor protein tyrosine kinase signaling pathway; P:response to symbiotic fungus; C:vacuolar membrane; C:plant-type cell wall; F:protein serine/threonine kinase activity; P:protein phosphorylation; C:anchored component of plasma membrane; F:ATP binding; C:plasmodesma; P:response to abscisic acid; C:mitochondrion; P:positive regulation of secondary growth; C:integral component of…	EC:2.7.11	Transferring phosphorus-containing groups
CotAD_45281	receptor kinase	852	20	0	56.65	16	F:GO:0042802; P:GO:0007169; P:GO:0009555; P:GO:0048657; F:GO:0046983; P:GO:0009741; F:GO:0004674; P:GO:0006468; C:GO:0005773; C:GO:0005886; P:GO:0009755; F:GO:0005524; C:GO:0005768; P:GO:0032989; C:GO:0016021; P:GO:0048580	F:identical protein binding; P:transmembrane receptor protein tyrosine kinase signaling pathway; P:pollen development; P:anther wall tapetum cell differentiation; F:protein dimerization activity; P:response to brassinosteroid; F:protein serine/threonine kinase activity; P:protein phosphorylation; C:vacuole; C:plasma membrane; P:hormone-mediated signaling pathway; F:ATP binding; C:endosome; P:cell…	EC:2.7.11	Transferring phosphorus-containing groups
CotAD_45404	leucine-rich repeat receptor	724	20	0	66.75	10	C:GO:0005634; F:GO:0005524; C:GO:0016021; C:GO:0005829; P:GO:0007169; C:GO:0005576; P:GO:0006468; P:GO:0007623; C:GO:0005886; F:GO:0004675	C:nucleus; F:ATP binding; C:integral component of membrane; C:cytosol; P:transmembrane receptor protein tyrosine kinase signaling pathway; C:extracellular region; P:protein phosphorylation; P:circadian rhythm; C:plasma membrane; F:transmembrane receptor protein serine/threonine kinase activity	EC:2.7.11	Transferring phosphorus-containing groups
CotAD_45775	receptor kinase	1211	20	0	69.95	22	P:GO:1900140; F:GO:0042803; P:GO:0009742; P:GO:0048657; P:GO:0060548; C:GO:0043234; F:GO:0005496; F:GO:0004674; P:GO:0009911; C:GO:0005886; P:GO:0009734; P:GO:0009729; P:GO:0009826; C:GO:0005768; F:GO:0046982; F:GO:0019199; P:GO:0048366; P:GO:0010305; P:GO:0010233; P:GO:0010584; P:GO:0010224; P:GO:0010268	P:regulation of seedling development; F:protein homodimerization activity; P:brassinosteroid mediated signaling pathway; P:anther wall tapetum cell differentiation; P:negative regulation of cell death; C:protein complex; F:steroid binding; F:protein serine/threonine kinase activity; P:positive regulation of flower development; C:plasma membrane; P:auxin-activated signaling pathway; P:detection of…	EC:2.7.11	Transferring phosphorus-containing groups
CotAD_45931	Leucine-rich repeat kinase family	544	20	2.78e-119	55.85	13	P:GO:0009626; P:GO:0006898; P:GO:0042742; C:GO:0005886; P:GO:0052544; P:GO:0002764; C:GO:0009507; C:GO:0005768; F:GO:0005515; F:GO:0019199; P:GO:0010204; P:GO:0016045; P:GO:0010359	P:plant-type hypersensitive response; P:receptor-mediated endocytosis; P:defense response to bacterium; C:plasma membrane; P:defense response by callose deposition in cell wall; P:immune response-regulating signaling pathway; C:chloroplast; C:endosome; F:protein binding; F:transmembrane receptor protein kinase activity; P:defense response signaling pathway, resistance gene-independent; P:detectio…	EC:2.7.11	Transferring phosphorus-containing groups
CotAD_45995	Leucine-rich repeat kinase family	661	20	0	55.5	6	F:GO:0005524; P:GO:0007275; P:GO:0007169; F:GO:0004674; P:GO:0006468; C:GO:0005886	F:ATP binding; P:multicellular organism development; P:transmembrane receptor protein tyrosine kinase signaling pathway; F:protein serine/threonine kinase activity; P:protein phosphorylation; C:plasma membrane	EC:2.7.11	Transferring phosphorus-containing groups
CotAD_46053	Leucine-rich repeat kinase family	972	20	0	64.75	7	F:GO:0005524; P:GO:0007169; C:GO:0005576; F:GO:0004674; P:GO:0006468; C:GO:0005773; C:GO:0005886	F:ATP binding; P:transmembrane receptor protein tyrosine kinase signaling pathway; C:extracellular region; F:protein serine/threonine kinase activity; P:protein phosphorylation; C:vacuole; C:plasma membrane	EC:2.7.11	Transferring phosphorus-containing groups
CotAD_46130	receptor kinase	1112	20	0	51.8	11	C:GO:0009507; P:GO:0009617; C:GO:0005768; P:GO:0051179; P:GO:0007275; P:GO:0051716; F:GO:0005488; P:GO:0006952; F:GO:0016301; P:GO:0050789; C:GO:0005886	C:chloroplast; P:response to bacterium; C:endosome; P:localization; P:multicellular organism development; P:cellular response to stimulus; F:binding; P:defense response; F:kinase activity; P:regulation of biological process; C:plasma membrane
CotAD_46131	receptor kinase	1094	20	0	52.55	12	P:GO:0002764; C:GO:0009507; C:GO:0005768; F:GO:0005515; P:GO:0051179; P:GO:0010204; P:GO:0048856; F:GO:0004672; P:GO:0016045; P:GO:0010359; P:GO:0009626; C:GO:0005886	P:immune response-regulating signaling pathway; C:chloroplast; C:endosome; F:protein binding; P:localization; P:defense response signaling pathway, resistance gene-independent; P:anatomical structure development; F:protein kinase activity; P:detection of bacterium; P:regulation of anion channel activity; P:plant-type hypersensitive response; C:plasma membrane
CotAD_46153	receptor kinase	613	20	1.14e-114	53.1	6	P:GO:0007165; F:GO:0005488; F:GO:0016301; C:GO:0005886; P:GO:0002376; P:GO:0050776	P:signal transduction; F:binding; F:kinase activity; C:plasma membrane; P:immune system process; P:regulation of immune response
CotAD_46319	leucine-rich repeat receptor	812	20	0	61.85	17	P:GO:0010063; P:GO:0010071; P:GO:0000902; P:GO:0007166; F:GO:0004674; P:GO:0007623; F:GO:0004871; C:GO:0005886; P:GO:0042127; C:GO:0005634; C:GO:0009506; P:GO:0048366; C:GO:0005829; P:GO:0010305; P:GO:0016310; P:GO:0048481; P:GO:0010059	P:positive regulation of trichoblast fate specification; P:root meristem specification; P:cell morphogenesis; P:cell surface receptor signaling pathway; F:protein serine/threonine kinase activity; P:circadian rhythm; F:signal transducer activity; C:plasma membrane; P:regulation of cell proliferation; C:nucleus; C:plasmodesma; P:leaf development; C:cytosol; P:leaf vascular tissue pattern formation…	EC:2.7.11	Transferring phosphorus-containing groups
CotAD_46478	Leucine-rich receptor kinase family	725	20	0	56.6	16	P:GO:0010075; P:GO:0010183; P:GO:0007169; P:GO:0046777; F:GO:0004674; C:GO:0005886; P:GO:0051301; F:GO:0005524; F:GO:0005515; P:GO:0001944; P:GO:0099402; P:GO:2000604; P:GO:0010067; P:GO:0010089; C:GO:0090406; P:GO:0010223	P:regulation of meristem growth; P:pollen tube guidance; P:transmembrane receptor protein tyrosine kinase signaling pathway; P:protein autophosphorylation; F:protein serine/threonine kinase activity; C:plasma membrane; P:cell division; F:ATP binding; F:protein binding; P:vasculature development; P:plant organ development; P:negative regulation of secondary growth; P:procambium histogenesis; P:xyl…	EC:2.7.11	Transferring phosphorus-containing groups
CotAD_46866	kinase superfamily	979	20	0	58.95	8	F:GO:0019901; C:GO:0009506; P:GO:0007165; P:GO:0009555; C:GO:0005794; C:GO:0009505; C:GO:0005886; F:GO:0004675	F:protein kinase binding; C:plasmodesma; P:signal transduction; P:pollen development; C:Golgi apparatus; C:plant-type cell wall; C:plasma membrane; F:transmembrane receptor protein serine/threonine kinase activity	EC:2.7.11	Transferring phosphorus-containing groups
CotAD_46914	Leucine-rich receptor kinase family	1100	20	0	70.3	9	F:GO:0005524; F:GO:0005515; P:GO:0010082; P:GO:0010449; C:GO:0016021; P:GO:0007169; F:GO:0004674; P:GO:0006468; C:GO:0005886	F:ATP binding; F:protein binding; P:regulation of root meristem growth; P:root meristem growth; C:integral component of membrane; P:transmembrane receptor protein tyrosine kinase signaling pathway; F:protein serine/threonine kinase activity; P:protein phosphorylation; C:plasma membrane	EC:2.7.11	Transferring phosphorus-containing groups
CotAD_47120	Leucine-rich repeat kinase family	597	20	3.64e-65	46.85	3	C:GO:0016020; C:GO:0044444; C:GO:0071944	C:membrane; C:cytoplasmic part; C:cell periphery
CotAD_47174	Leucine-rich repeat kinase family	788	20	0	56.3	6	F:GO:0005524; C:GO:0005739; P:GO:0007169; F:GO:0004674; P:GO:0006468; C:GO:0005886	F:ATP binding; C:mitochondrion; P:transmembrane receptor protein tyrosine kinase signaling pathway; F:protein serine/threonine kinase activity; P:protein phosphorylation; C:plasma membrane	EC:2.7.11	Transferring phosphorus-containing groups
CotAD_47429	Leucine-rich repeat kinase family	899	20	0	55.8	10	F:GO:0005524; P:GO:0003006; C:GO:0009506; P:GO:0007275; P:GO:0007169; C:GO:0009505; F:GO:0004674; P:GO:0006468; C:GO:0005886; P:GO:0044702	F:ATP binding; P:developmental process involved in reproduction; C:plasmodesma; P:multicellular organism development; P:transmembrane receptor protein tyrosine kinase signaling pathway; C:plant-type cell wall; F:protein serine/threonine kinase activity; P:protein phosphorylation; C:plasma membrane; P:single organism reproductive process	EC:2.7.11	Transferring phosphorus-containing groups
CotAD_47446	Leucine-rich receptor kinase family	911	20	0	68.25	9	F:GO:0005524; F:GO:0005515; P:GO:0010082; P:GO:0010449; C:GO:0016021; P:GO:0007169; F:GO:0004674; P:GO:0006468; C:GO:0005886	F:ATP binding; F:protein binding; P:regulation of root meristem growth; P:root meristem growth; C:integral component of membrane; P:transmembrane receptor protein tyrosine kinase signaling pathway; F:protein serine/threonine kinase activity; P:protein phosphorylation; C:plasma membrane	EC:2.7.11	Transferring phosphorus-containing groups
CotAD_47479	receptor kinase	1211	20	0	68.35	22	P:GO:1900140; F:GO:0042803; P:GO:0009742; P:GO:0048657; P:GO:0060548; C:GO:0043234; F:GO:0005496; F:GO:0004674; P:GO:0009911; C:GO:0005886; P:GO:0009734; P:GO:0009729; P:GO:0009826; C:GO:0005768; F:GO:0046982; F:GO:0019199; P:GO:0048366; P:GO:0010305; P:GO:0010233; P:GO:0010584; P:GO:0010224; P:GO:0010268	P:regulation of seedling development; F:protein homodimerization activity; P:brassinosteroid mediated signaling pathway; P:anther wall tapetum cell differentiation; P:negative regulation of cell death; C:protein complex; F:steroid binding; F:protein serine/threonine kinase activity; P:positive regulation of flower development; C:plasma membrane; P:auxin-activated signaling pathway; P:detection of…	EC:2.7.11	Transferring phosphorus-containing groups
CotAD_47651	Leucine-rich repeat kinase family	594	20	0	65.85	17	P:GO:1900150; P:GO:0009556; P:GO:0007169; P:GO:0060548; C:GO:0005576; F:GO:0004674; P:GO:0006468; P:GO:1900425; P:GO:0042742; C:GO:0005886; C:GO:0005634; F:GO:0005524; C:GO:0009507; C:GO:0009506; C:GO:0016021; F:GO:0033612; P:GO:0010234	P:regulation of defense response to fungus; P:microsporogenesis; P:transmembrane receptor protein tyrosine kinase signaling pathway; P:negative regulation of cell death; C:extracellular region; F:protein serine/threonine kinase activity; P:protein phosphorylation; P:negative regulation of defense response to bacterium; P:defense response to bacterium; C:plasma membrane; C:nucleus; F:ATP binding; …	EC:2.7.11	Transferring phosphorus-containing groups
CotAD_47770	receptor kinase	680	20	0	50.4	6	F:GO:0005524; P:GO:0009793; P:GO:0007169; F:GO:0004674; P:GO:0006468; C:GO:0005886	F:ATP binding; P:embryo development ending in seed dormancy; P:transmembrane receptor protein tyrosine kinase signaling pathway; F:protein serine/threonine kinase activity; P:protein phosphorylation; C:plasma membrane	EC:2.7.11	Transferring phosphorus-containing groups
CotAD_47800	Leucine-rich repeat transmembrane kinase	939	20	0	60.65	7	C:GO:0009506; F:GO:0005515; P:GO:0045088; P:GO:0009861; P:GO:0016310; F:GO:0004674; C:GO:0005886	C:plasmodesma; F:protein binding; P:regulation of innate immune response; P:jasmonic acid and ethylene-dependent systemic resistance; P:phosphorylation; F:protein serine/threonine kinase activity; C:plasma membrane	EC:2.7.11	Transferring phosphorus-containing groups
CotAD_47801	Leucine-rich repeat transmembrane kinase	993	20	0	68.35	9	F:GO:0005524; F:GO:0004702; C:GO:0009506; F:GO:0005515; P:GO:0045088; P:GO:0007169; P:GO:0009861; P:GO:0006468; C:GO:0005886	F:ATP binding; F:signal transducer, downstream of receptor, with serine/threonine kinase activity; C:plasmodesma; F:protein binding; P:regulation of innate immune response; P:transmembrane receptor protein tyrosine kinase signaling pathway; P:jasmonic acid and ethylene-dependent systemic resistance; P:protein phosphorylation; C:plasma membrane	EC:2.7.11	Transferring phosphorus-containing groups
CotAD_47804	Leucine-rich repeat transmembrane kinase	1034	20	0	59.65	7	C:GO:0009506; F:GO:0005515; P:GO:0045088; P:GO:0009861; F:GO:0004674; C:GO:0005886; P:GO:0009987	C:plasmodesma; F:protein binding; P:regulation of innate immune response; P:jasmonic acid and ethylene-dependent systemic resistance; F:protein serine/threonine kinase activity; C:plasma membrane; P:cellular process	EC:2.7.11	Transferring phosphorus-containing groups
CotAD_47824	Leucine-rich repeat kinase family	765	20	0	57.65	6	F:GO:0005524; C:GO:0005739; P:GO:0007169; F:GO:0004674; P:GO:0006468; C:GO:0005886	F:ATP binding; C:mitochondrion; P:transmembrane receptor protein tyrosine kinase signaling pathway; F:protein serine/threonine kinase activity; P:protein phosphorylation; C:plasma membrane	EC:2.7.11	Transferring phosphorus-containing groups
CotAD_47865	Leucine-rich receptor kinase family	988	20	0	59.25	15	P:GO:1902025; P:GO:0007169; P:GO:0046777; F:GO:0042277; F:GO:0004674; P:GO:0009845; C:GO:0005886; F:GO:0005524; P:GO:0006979; P:GO:0045490; F:GO:0005515; P:GO:0010468; P:GO:0010227; P:GO:0090548; P:GO:0010102	P:nitrate import; P:transmembrane receptor protein tyrosine kinase signaling pathway; P:protein autophosphorylation; F:peptide binding; F:protein serine/threonine kinase activity; P:seed germination; C:plasma membrane; F:ATP binding; P:response to oxidative stress; P:pectin catabolic process; F:protein binding; P:regulation of gene expression; P:floral organ abscission; P:response to nitrate star…	EC:2.7.11	Transferring phosphorus-containing groups
CotAD_47867	Leucine-rich receptor kinase family	1026	20	0	66.3	23	P:GO:0010075; P:GO:0007172; P:GO:0010183; P:GO:0007169; P:GO:0046777; P:GO:0048437; C:GO:0000325; P:GO:0009934; F:GO:0043621; C:GO:0005886; P:GO:0048364; P:GO:0051301; F:GO:0005524; F:GO:0004702; C:GO:0009506; P:GO:0001944; C:GO:0016021; P:GO:0030154; P:GO:0010067; P:GO:0010089; F:GO:0033612; C:GO:0090406; P:GO:0010223	P:regulation of meristem growth; P:signal complex assembly; P:pollen tube guidance; P:transmembrane receptor protein tyrosine kinase signaling pathway; P:protein autophosphorylation; P:floral organ development; C:plant-type vacuole; P:regulation of meristem structural organization; F:protein self-association; C:plasma membrane; P:root development; P:cell division; F:ATP binding; F:signal transduc…	EC:2.7.11	Transferring phosphorus-containing groups
CotAD_47868	Leucine-rich receptor kinase family	1047	20	0	64.85	23	P:GO:0007172; P:GO:0010082; P:GO:0010183; P:GO:0007169; P:GO:0046777; P:GO:0048437; C:GO:0000325; P:GO:0009934; F:GO:0043621; C:GO:0005886; P:GO:0051301; F:GO:0005524; F:GO:0004702; C:GO:0009506; P:GO:0010449; P:GO:0001944; C:GO:0016021; P:GO:0030154; P:GO:0010067; P:GO:0010089; F:GO:0033612; C:GO:0090406; P:GO:0010223	P:signal complex assembly; P:regulation of root meristem growth; P:pollen tube guidance; P:transmembrane receptor protein tyrosine kinase signaling pathway; P:protein autophosphorylation; P:floral organ development; C:plant-type vacuole; P:regulation of meristem structural organization; F:protein self-association; C:plasma membrane; P:cell division; F:ATP binding; F:signal transducer, downstream …	EC:2.7.11	Transferring phosphorus-containing groups
CotAD_48311	Leucine-rich receptor kinase family	1004	20	0	58.85	22	P:GO:0007172; P:GO:0010082; P:GO:0010183; P:GO:0007169; P:GO:0046777; P:GO:0048437; C:GO:0000325; F:GO:0004674; P:GO:0009934; F:GO:0043621; C:GO:0005886; P:GO:0051301; F:GO:0005524; C:GO:0009506; P:GO:0010449; P:GO:0001944; P:GO:0030154; P:GO:0010067; P:GO:0010089; F:GO:0033612; C:GO:0090406; P:GO:0010223	P:signal complex assembly; P:regulation of root meristem growth; P:pollen tube guidance; P:transmembrane receptor protein tyrosine kinase signaling pathway; P:protein autophosphorylation; P:floral organ development; C:plant-type vacuole; F:protein serine/threonine kinase activity; P:regulation of meristem structural organization; F:protein self-association; C:plasma membrane; P:cell division; F:A…	EC:2.7.11	Transferring phosphorus-containing groups
CotAD_49044	Leucine-rich receptor kinase family	1008	20	0	61.95	23	P:GO:0010075; P:GO:0007172; P:GO:0010183; P:GO:0007169; P:GO:0046777; P:GO:0048437; C:GO:0000325; F:GO:0004674; P:GO:0009934; F:GO:0043621; C:GO:0005886; P:GO:0048364; P:GO:0051301; F:GO:0005524; C:GO:0009506; P:GO:0001944; C:GO:0016021; P:GO:0030154; P:GO:0010067; P:GO:0010089; F:GO:0033612; C:GO:0090406; P:GO:0010223	P:regulation of meristem growth; P:signal complex assembly; P:pollen tube guidance; P:transmembrane receptor protein tyrosine kinase signaling pathway; P:protein autophosphorylation; P:floral organ development; C:plant-type vacuole; F:protein serine/threonine kinase activity; P:regulation of meristem structural organization; F:protein self-association; C:plasma membrane; P:root development; P:cel…	EC:2.7.11	Transferring phosphorus-containing groups
CotAD_49160	Leucine-rich receptor kinase family	788	20	1.27e-144	51.45	7	C:GO:0009506; F:GO:0005515; P:GO:0007275; P:GO:0010183; F:GO:0042277; C:GO:0005886; C:GO:0090406	C:plasmodesma; F:protein binding; P:multicellular organism development; P:pollen tube guidance; F:peptide binding; C:plasma membrane; C:pollen tube
CotAD_49280	Leucine-rich receptor kinase family	907	20	0	58.9	14	P:GO:1902025; P:GO:0010051; P:GO:0007169; P:GO:0046777; P:GO:0009960; F:GO:0004674; P:GO:0009845; C:GO:0005886; F:GO:0005524; P:GO:0006979; F:GO:0005515; P:GO:0099402; F:GO:0017046; P:GO:0090548	P:nitrate import; P:xylem and phloem pattern formation; P:transmembrane receptor protein tyrosine kinase signaling pathway; P:protein autophosphorylation; P:endosperm development; F:protein serine/threonine kinase activity; P:seed germination; C:plasma membrane; F:ATP binding; P:response to oxidative stress; F:protein binding; P:plant organ development; F:peptide hormone binding; P:response to ni…	EC:2.7.11	Transferring phosphorus-containing groups
CotAD_49489	Leucine-rich repeat receptor kinase family	773	20	4.26e-178	55.3	15	P:GO:0090558; P:GO:0048608; P:GO:0010183; P:GO:0009791; P:GO:0009653; P:GO:0048507; C:GO:0005886; P:GO:0044702; P:GO:0048364; C:GO:0009506; F:GO:0005515; P:GO:0048367; F:GO:0016301; P:GO:0050789; C:GO:0090406	P:plant epidermis development; P:reproductive structure development; P:pollen tube guidance; P:post-embryonic development; P:anatomical structure morphogenesis; P:meristem development; C:plasma membrane; P:single organism reproductive process; P:root development; C:plasmodesma; F:protein binding; P:shoot system development; F:kinase activity; P:regulation of biological process; C:pollen tube
CotAD_49490	Leucine-rich repeat receptor kinase family	391	20	3.04e-55	62.85	11	C:GO:0005634; F:GO:0005524; C:GO:0009506; F:GO:0005515; P:GO:0010183; P:GO:0007169; F:GO:0004674; P:GO:0006468; C:GO:0005886; C:GO:0090406; P:GO:0044767	C:nucleus; F:ATP binding; C:plasmodesma; F:protein binding; P:pollen tube guidance; P:transmembrane receptor protein tyrosine kinase signaling pathway; F:protein serine/threonine kinase activity; P:protein phosphorylation; C:plasma membrane; C:pollen tube; P:single-organism developmental process	EC:2.7.11	Transferring phosphorus-containing groups
CotAD_50180	receptor kinase	786	20	2.45e-177	57.6	9	P:GO:0002764; C:GO:0009507; F:GO:0005515; F:GO:0019199; P:GO:0010204; P:GO:0016045; P:GO:0010359; P:GO:0009626; C:GO:0005886	P:immune response-regulating signaling pathway; C:chloroplast; F:protein binding; F:transmembrane receptor protein kinase activity; P:defense response signaling pathway, resistance gene-independent; P:detection of bacterium; P:regulation of anion channel activity; P:plant-type hypersensitive response; C:plasma membrane	EC:2.7.11	Transferring phosphorus-containing groups
CotAD_50376	Leucine-rich receptor kinase family	1138	20	0	52.6	12	F:GO:0001653; C:GO:0009506; F:GO:0005515; P:GO:0006955; P:GO:0007275; P:GO:0009611; F:GO:0004383; P:GO:0009753; F:GO:0042277; F:GO:0016301; P:GO:0042742; C:GO:0005886	F:peptide receptor activity; C:plasmodesma; F:protein binding; P:immune response; P:multicellular organism development; P:response to wounding; F:guanylate cyclase activity; P:response to jasmonic acid; F:peptide binding; F:kinase activity; P:defense response to bacterium; C:plasma membrane	EC:4.6.1.2	Guanylate cyclase
CotAD_50478	leucine-rich repeat receptor	704	20	0	62.55	9	C:GO:0005634; F:GO:0005524; C:GO:0009506; C:GO:0005829; P:GO:0007169; C:GO:0005576; P:GO:0006468; C:GO:0005886; F:GO:0004675	C:nucleus; F:ATP binding; C:plasmodesma; C:cytosol; P:transmembrane receptor protein tyrosine kinase signaling pathway; C:extracellular region; P:protein phosphorylation; C:plasma membrane; F:transmembrane receptor protein serine/threonine kinase activity	EC:2.7.11	Transferring phosphorus-containing groups
CotAD_50484	Leucine-rich repeat kinase family	666	20	0	63	13	C:GO:0090404; F:GO:0042802; P:GO:0009860; P:GO:0010183; P:GO:0007169; F:GO:0004674; P:GO:0006468; P:GO:0009846; F:GO:0005524; C:GO:0009506; C:GO:0005737; C:GO:0016324; P:GO:0080092	C:pollen tube tip; F:identical protein binding; P:pollen tube growth; P:pollen tube guidance; P:transmembrane receptor protein tyrosine kinase signaling pathway; F:protein serine/threonine kinase activity; P:protein phosphorylation; P:pollen germination; F:ATP binding; C:plasmodesma; C:cytoplasm; C:apical plasma membrane; P:regulation of pollen tube growth	EC:2.7.11	Transferring phosphorus-containing groups
CotAD_50934	somatic embryogenesis receptor-like kinase 5	620	20	0	84.75	29	P:GO:0009793; P:GO:0007030; P:GO:0009556; P:GO:0046777; P:GO:0060548; F:GO:0008289; C:GO:0005789; F:GO:0005524; P:GO:0008219; F:GO:0004714; F:GO:0046982; P:GO:0050832; F:GO:0033612; P:GO:0010152; F:GO:0042802; P:GO:1900140; P:GO:0010150; P:GO:0009742; P:GO:0007166; C:GO:0043234; P:GO:0042742; C:GO:0005886; F:GO:0004675; P:GO:0002229; C:GO:0016021; C:GO:0010008; P:GO:0010227; P:GO:0010200; P:GO:00…	P:embryo development ending in seed dormancy; P:Golgi organization; P:microsporogenesis; P:protein autophosphorylation; P:negative regulation of cell death; F:lipid binding; C:endoplasmic reticulum membrane; F:ATP binding; P:cell death; F:transmembrane receptor protein tyrosine kinase activity; F:protein heterodimerization activity; P:defense response to fungus; F:receptor serine/threonine kinase…	EC:2.7.10; EC:2.7.10.1; EC:2.7.11	Transferring phosphorus-containing groups; Receptor protein-tyrosine kinase; Transferring phosphorus-containing groups
CotAD_51412	receptor kinase	953	20	0	67.2	12	F:GO:0005524; F:GO:0019901; C:GO:0009506; C:GO:0016021; P:GO:0009555; C:GO:0005794; P:GO:0007166; C:GO:0005576; C:GO:0009505; P:GO:0006468; C:GO:0005886; F:GO:0004675	F:ATP binding; F:protein kinase binding; C:plasmodesma; C:integral component of membrane; P:pollen development; C:Golgi apparatus; P:cell surface receptor signaling pathway; C:extracellular region; C:plant-type cell wall; P:protein phosphorylation; C:plasma membrane; F:transmembrane receptor protein serine/threonine kinase activity	EC:2.7.11	Transferring phosphorus-containing groups
CotAD_51795	Leucine-rich repeat kinase family	903	20	0	53.9	5	F:GO:0005524; C:GO:0016021; F:GO:0004674; P:GO:0006468; C:GO:0005886	F:ATP binding; C:integral component of membrane; F:protein serine/threonine kinase activity; P:protein phosphorylation; C:plasma membrane	EC:2.7.11	Transferring phosphorus-containing groups
CotAD_51873	Leucine-rich repeat kinase family	573	20	1.42e-171	60.65	5	F:GO:0005524; P:GO:0007169; F:GO:0004674; P:GO:0006468; C:GO:0005886	F:ATP binding; P:transmembrane receptor protein tyrosine kinase signaling pathway; F:protein serine/threonine kinase activity; P:protein phosphorylation; C:plasma membrane	EC:2.7.11	Transferring phosphorus-containing groups
CotAD_51911	Leucine-rich repeat kinase family	905	20	0	54.05	5	F:GO:0005524; C:GO:0016021; F:GO:0004674; P:GO:0006468; C:GO:0005886	F:ATP binding; C:integral component of membrane; F:protein serine/threonine kinase activity; P:protein phosphorylation; C:plasma membrane	EC:2.7.11	Transferring phosphorus-containing groups
CotAD_51936	Leucine-rich repeat kinase family	778	20	0	63	7	F:GO:0005524; C:GO:0009506; P:GO:0007169; C:GO:0009505; F:GO:0004674; P:GO:0006468; C:GO:0005886	F:ATP binding; C:plasmodesma; P:transmembrane receptor protein tyrosine kinase signaling pathway; C:plant-type cell wall; F:protein serine/threonine kinase activity; P:protein phosphorylation; C:plasma membrane	EC:2.7.11	Transferring phosphorus-containing groups
CotAD_52119	Leucine-rich repeat kinase family	929	20	0	65.65	5	C:GO:0009506; F:GO:0004672; P:GO:0016310; C:GO:0005576; C:GO:0005886	C:plasmodesma; F:protein kinase activity; P:phosphorylation; C:extracellular region; C:plasma membrane
CotAD_52196	Leucine-rich repeat transmembrane kinase	992	20	0	75.95	5	F:GO:0005524; C:GO:0009506; F:GO:0004672; P:GO:0016310; C:GO:0005886	F:ATP binding; C:plasmodesma; F:protein kinase activity; P:phosphorylation; C:plasma membrane
CotAD_52223	Leucine-rich repeat receptor kinase family	1029	20	0	53.45	9	P:GO:0048364; C:GO:0009506; F:GO:0005515; P:GO:0010183; F:GO:0016301; P:GO:0048507; P:GO:0050789; C:GO:0005886; C:GO:0090406	P:root development; C:plasmodesma; F:protein binding; P:pollen tube guidance; F:kinase activity; P:meristem development; P:regulation of biological process; C:plasma membrane; C:pollen tube
CotAD_52224	Leucine-rich repeat receptor kinase family	960	20	0	53.8	10	P:GO:0048364; C:GO:0009506; F:GO:0005515; P:GO:0010183; F:GO:0004672; P:GO:0006468; P:GO:0048507; P:GO:0050789; C:GO:0005886; C:GO:0090406	P:root development; C:plasmodesma; F:protein binding; P:pollen tube guidance; F:protein kinase activity; P:protein phosphorylation; P:meristem development; P:regulation of biological process; C:plasma membrane; C:pollen tube
CotAD_52229	Leucine-rich repeat receptor kinase family	673	20	3.88e-155	56.4	8	C:GO:0009506; F:GO:0005515; P:GO:0048367; P:GO:0010183; P:GO:0009791; F:GO:0016301; C:GO:0005886; C:GO:0090406	C:plasmodesma; F:protein binding; P:shoot system development; P:pollen tube guidance; P:post-embryonic development; F:kinase activity; C:plasma membrane; C:pollen tube
CotAD_52231	Leucine-rich repeat kinase family	419	20	1.32e-59	52.45	8	P:GO:0003006; P:GO:0048731; C:GO:0016020; C:GO:0044464; F:GO:0005488; P:GO:0050789; P:GO:0009888; P:GO:0050896	P:developmental process involved in reproduction; P:system development; C:membrane; C:cell part; F:binding; P:regulation of biological process; P:tissue development; P:response to stimulus
CotAD_52233	receptor kinase	738	20	2.2e-163	53.95	10	C:GO:0009506; F:GO:0005515; P:GO:0009793; P:GO:0010183; F:GO:0004672; F:GO:0042277; P:GO:0006468; C:GO:0005886; P:GO:0009888; C:GO:0090406	C:plasmodesma; F:protein binding; P:embryo development ending in seed dormancy; P:pollen tube guidance; F:protein kinase activity; F:peptide binding; P:protein phosphorylation; C:plasma membrane; P:tissue development; C:pollen tube
CotAD_52240	Leucine-rich repeat kinase family	505	20	1.49e-115	53.7	7	C:GO:0009506; F:GO:0005515; P:GO:0007275; P:GO:0010183; F:GO:0016301; C:GO:0005886; C:GO:0090406	C:plasmodesma; F:protein binding; P:multicellular organism development; P:pollen tube guidance; F:kinase activity; C:plasma membrane; C:pollen tube
CotAD_52244	receptor kinase	730	20	3.46e-133	52.85	14	P:GO:0090558; P:GO:0048608; P:GO:0010183; P:GO:0009791; F:GO:0042277; P:GO:0009653; C:GO:0005886; P:GO:0044702; C:GO:0009506; F:GO:0005515; P:GO:0048367; P:GO:0099402; P:GO:0050789; C:GO:0090406	P:plant epidermis development; P:reproductive structure development; P:pollen tube guidance; P:post-embryonic development; F:peptide binding; P:anatomical structure morphogenesis; C:plasma membrane; P:single organism reproductive process; C:plasmodesma; F:protein binding; P:shoot system development; P:plant organ development; P:regulation of biological process; C:pollen tube
CotAD_52268	receptor kinase	1164	20	0	70	12	P:GO:0052544; F:GO:0005524; C:GO:0005768; F:GO:0005515; P:GO:0007169; P:GO:0016045; P:GO:0010359; P:GO:0006468; P:GO:0006898; P:GO:0042742; C:GO:0005886; F:GO:0004675	P:defense response by callose deposition in cell wall; F:ATP binding; C:endosome; F:protein binding; P:transmembrane receptor protein tyrosine kinase signaling pathway; P:detection of bacterium; P:regulation of anion channel activity; P:protein phosphorylation; P:receptor-mediated endocytosis; P:defense response to bacterium; C:plasma membrane; F:transmembrane receptor protein serine/threonine ki…	EC:2.7.11	Transferring phosphorus-containing groups
CotAD_52283	Leucine-rich repeat transmembrane kinase	967	20	0	62.15	7	C:GO:0009506; F:GO:0005515; P:GO:0045088; P:GO:0009861; P:GO:0016310; F:GO:0004674; C:GO:0005886	C:plasmodesma; F:protein binding; P:regulation of innate immune response; P:jasmonic acid and ethylene-dependent systemic resistance; P:phosphorylation; F:protein serine/threonine kinase activity; C:plasma membrane	EC:2.7.11	Transferring phosphorus-containing groups
CotAD_52468	Leucine-rich repeat kinase family	608	20	0	62.6	12	F:GO:0005524; C:GO:0009506; P:GO:0009737; C:GO:0005739; P:GO:2000605; P:GO:0007169; P:GO:0009610; C:GO:0005774; C:GO:0009505; F:GO:0004674; P:GO:0006468; C:GO:0046658	F:ATP binding; C:plasmodesma; P:response to abscisic acid; C:mitochondrion; P:positive regulation of secondary growth; P:transmembrane receptor protein tyrosine kinase signaling pathway; P:response to symbiotic fungus; C:vacuolar membrane; C:plant-type cell wall; F:protein serine/threonine kinase activity; P:protein phosphorylation; C:anchored component of plasma membrane	EC:2.7.11	Transferring phosphorus-containing groups
CotAD_52484	leucine-rich repeat receptor	721	20	0	68.8	10	C:GO:0005634; F:GO:0005524; C:GO:0016021; C:GO:0005829; P:GO:0007169; C:GO:0005576; P:GO:0006468; P:GO:0007623; C:GO:0005886; F:GO:0004675	C:nucleus; F:ATP binding; C:integral component of membrane; C:cytosol; P:transmembrane receptor protein tyrosine kinase signaling pathway; C:extracellular region; P:protein phosphorylation; P:circadian rhythm; C:plasma membrane; F:transmembrane receptor protein serine/threonine kinase activity	EC:2.7.11	Transferring phosphorus-containing groups
CotAD_52669	receptor kinase	895	20	0	61	9	C:GO:0009506; P:GO:0007165; P:GO:0009555; C:GO:0005794; C:GO:0005576; C:GO:0009505; F:GO:0005488; C:GO:0005886; F:GO:0004675	C:plasmodesma; P:signal transduction; P:pollen development; C:Golgi apparatus; C:extracellular region; C:plant-type cell wall; F:binding; C:plasma membrane; F:transmembrane receptor protein serine/threonine kinase activity	EC:2.7.11	Transferring phosphorus-containing groups
CotAD_52735	Leucine-rich repeat transmembrane kinase	1275	20	0	54.95	15	F:GO:0042802; P:GO:0010051; P:GO:0009556; F:GO:0046983; P:GO:0009741; F:GO:0004674; P:GO:0009755; C:GO:0009507; C:GO:0005768; P:GO:0032989; F:GO:0097159; F:GO:0019199; C:GO:0016020; P:GO:0048580; P:GO:0010234	F:identical protein binding; P:xylem and phloem pattern formation; P:microsporogenesis; F:protein dimerization activity; P:response to brassinosteroid; F:protein serine/threonine kinase activity; P:hormone-mediated signaling pathway; C:chloroplast; C:endosome; P:cellular component morphogenesis; F:organic cyclic compound binding; F:transmembrane receptor protein kinase activity; C:membrane; P:reg…	EC:2.7.11	Transferring phosphorus-containing groups
CotAD_52756	leucine-rich repeat receptor	1005	20	0	56.85	14	P:GO:0010075; P:GO:0010183; P:GO:0046777; F:GO:0004672; F:GO:0042277; P:GO:0044763; C:GO:0005886; P:GO:0045490; F:GO:0005515; P:GO:0001944; P:GO:0010468; P:GO:0010227; C:GO:0090406; P:GO:0010102	P:regulation of meristem growth; P:pollen tube guidance; P:protein autophosphorylation; F:protein kinase activity; F:peptide binding; P:single-organism cellular process; C:plasma membrane; P:pectin catabolic process; F:protein binding; P:vasculature development; P:regulation of gene expression; P:floral organ abscission; C:pollen tube; P:lateral root morphogenesis
CotAD_52911	Leucine-rich receptor kinase family	945	20	0	57.35	15	P:GO:0048509; P:GO:0010183; P:GO:0007169; P:GO:0046777; F:GO:0004674; C:GO:0005886; P:GO:0051301; F:GO:0005524; F:GO:0005515; P:GO:0001944; P:GO:2000604; P:GO:0010067; P:GO:0010089; C:GO:0090406; P:GO:0010223	P:regulation of meristem development; P:pollen tube guidance; P:transmembrane receptor protein tyrosine kinase signaling pathway; P:protein autophosphorylation; F:protein serine/threonine kinase activity; C:plasma membrane; P:cell division; F:ATP binding; F:protein binding; P:vasculature development; P:negative regulation of secondary growth; P:procambium histogenesis; P:xylem development; C:poll…	EC:2.7.11	Transferring phosphorus-containing groups
CotAD_53070	receptor kinase	922	20	0	61.4	12	C:GO:0009506; C:GO:0005829; P:GO:0009555; C:GO:0005794; P:GO:0007166; C:GO:0005576; C:GO:0009505; F:GO:0005488; P:GO:0006468; C:GO:0005886; P:GO:0048869; F:GO:0004675	C:plasmodesma; C:cytosol; P:pollen development; C:Golgi apparatus; P:cell surface receptor signaling pathway; C:extracellular region; C:plant-type cell wall; F:binding; P:protein phosphorylation; C:plasma membrane; P:cellular developmental process; F:transmembrane receptor protein serine/threonine kinase activity	EC:2.7.11	Transferring phosphorus-containing groups
CotAD_53086	Leucine-rich receptor kinase family	959	20	0	59.3	20	P:GO:1902025; P:GO:0010051; P:GO:0010183; P:GO:0046777; P:GO:0009960; F:GO:0004674; P:GO:0009845; C:GO:0005886; F:GO:0005524; P:GO:0006979; P:GO:0045490; F:GO:0005515; P:GO:0001944; C:GO:0016021; P:GO:0010468; F:GO:0017046; P:GO:0010227; P:GO:0090548; C:GO:0090406; P:GO:0010102	P:nitrate import; P:xylem and phloem pattern formation; P:pollen tube guidance; P:protein autophosphorylation; P:endosperm development; F:protein serine/threonine kinase activity; P:seed germination; C:plasma membrane; F:ATP binding; P:response to oxidative stress; P:pectin catabolic process; F:protein binding; P:vasculature development; C:integral component of membrane; P:regulation of gene expr…	EC:2.7.11	Transferring phosphorus-containing groups
CotAD_53087	Leucine-rich receptor kinase family	962	20	0	63.3	17	P:GO:1902025; P:GO:0010051; P:GO:0007169; P:GO:0046777; P:GO:0009960; F:GO:0004674; P:GO:0009845; C:GO:0005886; F:GO:0005524; P:GO:0006979; P:GO:0045490; F:GO:0005515; P:GO:0010468; F:GO:0017046; P:GO:0010227; P:GO:0090548; P:GO:0010102	P:nitrate import; P:xylem and phloem pattern formation; P:transmembrane receptor protein tyrosine kinase signaling pathway; P:protein autophosphorylation; P:endosperm development; F:protein serine/threonine kinase activity; P:seed germination; C:plasma membrane; F:ATP binding; P:response to oxidative stress; P:pectin catabolic process; F:protein binding; P:regulation of gene expression; F:peptide…	EC:2.7.11	Transferring phosphorus-containing groups
CotAD_53290	Leucine-rich repeat kinase family	493	20	5.13e-114	53.95	7	C:GO:0009507; P:GO:0007165; F:GO:0004672; F:GO:0005488; C:GO:0005886; P:GO:0002376; P:GO:0050776	C:chloroplast; P:signal transduction; F:protein kinase activity; F:binding; C:plasma membrane; P:immune system process; P:regulation of immune response
CotAD_53449	Leucine-rich receptor kinase family	812	20	2.03e-117	48.25	4	P:GO:0048731; P:GO:0007165; C:GO:0016020; C:GO:0044464	P:system development; P:signal transduction; C:membrane; C:cell part
CotAD_53451	Leucine-rich repeat kinase family	661	20	0	63.45	13	C:GO:0090404; F:GO:0042802; P:GO:0009860; P:GO:0010183; P:GO:0007169; F:GO:0004674; P:GO:0006468; P:GO:0009846; F:GO:0005524; C:GO:0009506; C:GO:0005737; C:GO:0016324; P:GO:0080092	C:pollen tube tip; F:identical protein binding; P:pollen tube growth; P:pollen tube guidance; P:transmembrane receptor protein tyrosine kinase signaling pathway; F:protein serine/threonine kinase activity; P:protein phosphorylation; P:pollen germination; F:ATP binding; C:plasmodesma; C:cytoplasm; C:apical plasma membrane; P:regulation of pollen tube growth	EC:2.7.11	Transferring phosphorus-containing groups
CotAD_53454	leucine-rich repeat receptor	706	20	0	65.3	9	C:GO:0005634; F:GO:0005524; C:GO:0009506; C:GO:0005829; P:GO:0007169; C:GO:0005576; P:GO:0006468; C:GO:0005886; F:GO:0004675	C:nucleus; F:ATP binding; C:plasmodesma; C:cytosol; P:transmembrane receptor protein tyrosine kinase signaling pathway; C:extracellular region; P:protein phosphorylation; C:plasma membrane; F:transmembrane receptor protein serine/threonine kinase activity	EC:2.7.11	Transferring phosphorus-containing groups
CotAD_53463	Leucine-rich repeat receptor kinase family	998	20	0	56.65	8	C:GO:0009506; F:GO:0005515; P:GO:0007275; P:GO:0010183; F:GO:0004672; C:GO:0005886; P:GO:0009987; C:GO:0090406	C:plasmodesma; F:protein binding; P:multicellular organism development; P:pollen tube guidance; F:protein kinase activity; C:plasma membrane; P:cellular process; C:pollen tube
CotAD_53665	Leucine-rich repeat kinase family	659	20	0	60.4	10	F:GO:0005524; F:GO:0005515; P:GO:0010183; P:GO:0007169; P:GO:0009653; F:GO:0004674; P:GO:0006468; C:GO:0005886; P:GO:0048869; C:GO:0090406	F:ATP binding; F:protein binding; P:pollen tube guidance; P:transmembrane receptor protein tyrosine kinase signaling pathway; P:anatomical structure morphogenesis; F:protein serine/threonine kinase activity; P:protein phosphorylation; C:plasma membrane; P:cellular developmental process; C:pollen tube	EC:2.7.11	Transferring phosphorus-containing groups
CotAD_53742	Leucine-rich repeat kinase family	744	20	0	64.4	9	F:GO:0005524; C:GO:0009507; P:GO:0010070; C:GO:0016020; P:GO:0007169; C:GO:0005576; F:GO:0004674; P:GO:0006468; C:GO:0071944	F:ATP binding; C:chloroplast; P:zygote asymmetric cell division; C:membrane; P:transmembrane receptor protein tyrosine kinase signaling pathway; C:extracellular region; F:protein serine/threonine kinase activity; P:protein phosphorylation; C:cell periphery	EC:2.7.11	Transferring phosphorus-containing groups
CotAD_53851	leucine-rich repeat receptor	876	20	0	67.3	8	P:GO:0009793; C:GO:0016020; F:GO:0004672; P:GO:0009553; C:GO:0005576; P:GO:0048481; P:GO:0009987; P:GO:0010103	P:embryo development ending in seed dormancy; C:membrane; F:protein kinase activity; P:embryo sac development; C:extracellular region; P:plant ovule development; P:cellular process; P:stomatal complex morphogenesis
CotAD_54399	Leucine-rich receptor kinase family	1016	20	0	65.85	22	P:GO:0007172; P:GO:0010082; P:GO:0010183; P:GO:0007169; P:GO:0046777; P:GO:0048437; C:GO:0000325; P:GO:0009934; F:GO:0043621; C:GO:0005886; P:GO:0051301; F:GO:0005524; F:GO:0004702; C:GO:0009506; P:GO:0001944; C:GO:0016021; P:GO:0030154; P:GO:0010067; P:GO:0010089; F:GO:0033612; C:GO:0090406; P:GO:0010223	P:signal complex assembly; P:regulation of root meristem growth; P:pollen tube guidance; P:transmembrane receptor protein tyrosine kinase signaling pathway; P:protein autophosphorylation; P:floral organ development; C:plant-type vacuole; P:regulation of meristem structural organization; F:protein self-association; C:plasma membrane; P:cell division; F:ATP binding; F:signal transducer, downstream …	EC:2.7.11	Transferring phosphorus-containing groups
CotAD_54434	Leucine-rich repeat receptor kinase family	996	20	0	57.6	8	C:GO:0009506; F:GO:0005515; P:GO:0007275; P:GO:0010183; F:GO:0004672; C:GO:0005886; P:GO:0009987; C:GO:0090406	C:plasmodesma; F:protein binding; P:multicellular organism development; P:pollen tube guidance; F:protein kinase activity; C:plasma membrane; P:cellular process; C:pollen tube
CotAD_54435	Leucine-rich repeat receptor kinase family	997	20	0	56	10	P:GO:0048364; C:GO:0009506; F:GO:0005515; P:GO:0010183; F:GO:0004672; P:GO:0048507; P:GO:0050789; C:GO:0005886; P:GO:0009987; C:GO:0090406	P:root development; C:plasmodesma; F:protein binding; P:pollen tube guidance; F:protein kinase activity; P:meristem development; P:regulation of biological process; C:plasma membrane; P:cellular process; C:pollen tube
CotAD_54436	Leucine-rich repeat receptor kinase family	1035	20	0	56.6	9	P:GO:0048364; C:GO:0009506; F:GO:0005515; P:GO:0010183; F:GO:0016301; P:GO:0048507; P:GO:0050789; C:GO:0005886; C:GO:0090406	P:root development; C:plasmodesma; F:protein binding; P:pollen tube guidance; F:kinase activity; P:meristem development; P:regulation of biological process; C:plasma membrane; C:pollen tube
CotAD_54914	receptor kinase	1006	20	4.54e-122	47.55	10	P:GO:0010053; F:GO:0005515; P:GO:0048608; C:GO:0005737; F:GO:0005094; C:GO:0016020; P:GO:0009791; F:GO:0016301; P:GO:0009932; P:GO:0044702	P:root epidermal cell differentiation; F:protein binding; P:reproductive structure development; C:cytoplasm; F:Rho GDP-dissociation inhibitor activity; C:membrane; P:post-embryonic development; F:kinase activity; P:cell tip growth; P:single organism reproductive process
CotAD_55051	Leucine-rich repeat kinase family	609	20	0	61.45	11	F:GO:0005524; C:GO:0009506; C:GO:0005739; P:GO:2000605; P:GO:0007169; C:GO:0005576; C:GO:0005774; C:GO:0009505; F:GO:0004674; P:GO:0006468; C:GO:0005886	F:ATP binding; C:plasmodesma; C:mitochondrion; P:positive regulation of secondary growth; P:transmembrane receptor protein tyrosine kinase signaling pathway; C:extracellular region; C:vacuolar membrane; C:plant-type cell wall; F:protein serine/threonine kinase activity; P:protein phosphorylation; C:plasma membrane	EC:2.7.11	Transferring phosphorus-containing groups
CotAD_55064	leucine-rich repeat receptor	987	20	0	57.95	12	F:GO:0005524; P:GO:0003006; F:GO:0005515; P:GO:0099402; P:GO:0009791; C:GO:0016021; P:GO:0007169; P:GO:0051704; F:GO:0004674; P:GO:0006468; P:GO:0048507; C:GO:0005886	F:ATP binding; P:developmental process involved in reproduction; F:protein binding; P:plant organ development; P:post-embryonic development; C:integral component of membrane; P:transmembrane receptor protein tyrosine kinase signaling pathway; P:multi-organism process; F:protein serine/threonine kinase activity; P:protein phosphorylation; P:meristem development; C:plasma membrane	EC:2.7.11	Transferring phosphorus-containing groups
CotAD_55480	receptor kinase	611	20	0	67	23	F:GO:0042802; P:GO:1900150; P:GO:0009556; P:GO:0007169; P:GO:0060548; F:GO:0046983; P:GO:0009741; C:GO:0005576; F:GO:0004674; P:GO:0006468; P:GO:1900425; P:GO:0042742; C:GO:0005886; C:GO:0005634; F:GO:0005524; C:GO:0009507; C:GO:0005768; C:GO:0009506; P:GO:0032989; C:GO:0016021; P:GO:0048580; F:GO:0033612; P:GO:0010234	F:identical protein binding; P:regulation of defense response to fungus; P:microsporogenesis; P:transmembrane receptor protein tyrosine kinase signaling pathway; P:negative regulation of cell death; F:protein dimerization activity; P:response to brassinosteroid; C:extracellular region; F:protein serine/threonine kinase activity; P:protein phosphorylation; P:negative regulation of defense response…	EC:2.7.11	Transferring phosphorus-containing groups
CotAD_55539	Leucine-rich repeat kinase family	795	20	0	64.75	8	F:GO:0005524; C:GO:0009506; P:GO:0007169; C:GO:0005774; C:GO:0009505; F:GO:0004674; P:GO:0006468; C:GO:0005886	F:ATP binding; C:plasmodesma; P:transmembrane receptor protein tyrosine kinase signaling pathway; C:vacuolar membrane; C:plant-type cell wall; F:protein serine/threonine kinase activity; P:protein phosphorylation; C:plasma membrane	EC:2.7.11	Transferring phosphorus-containing groups
CotAD_55631	receptor kinase	1164	20	0	70.05	12	P:GO:0052544; F:GO:0005524; C:GO:0005768; F:GO:0005515; P:GO:0007169; P:GO:0016045; P:GO:0010359; P:GO:0006468; P:GO:0006898; P:GO:0042742; C:GO:0005886; F:GO:0004675	P:defense response by callose deposition in cell wall; F:ATP binding; C:endosome; F:protein binding; P:transmembrane receptor protein tyrosine kinase signaling pathway; P:detection of bacterium; P:regulation of anion channel activity; P:protein phosphorylation; P:receptor-mediated endocytosis; P:defense response to bacterium; C:plasma membrane; F:transmembrane receptor protein serine/threonine ki…	EC:2.7.11	Transferring phosphorus-containing groups
CotAD_55701	Leucine-rich receptor kinase family	939	20	0	59.6	20	P:GO:1902025; P:GO:0010051; P:GO:0010183; P:GO:0046777; P:GO:0009960; F:GO:0004674; P:GO:0009845; C:GO:0005886; F:GO:0005524; P:GO:0006979; P:GO:0045490; F:GO:0005515; P:GO:0001944; C:GO:0016021; P:GO:0010468; F:GO:0017046; P:GO:0010227; P:GO:0090548; C:GO:0090406; P:GO:0010102	P:nitrate import; P:xylem and phloem pattern formation; P:pollen tube guidance; P:protein autophosphorylation; P:endosperm development; F:protein serine/threonine kinase activity; P:seed germination; C:plasma membrane; F:ATP binding; P:response to oxidative stress; P:pectin catabolic process; F:protein binding; P:vasculature development; C:integral component of membrane; P:regulation of gene expr…	EC:2.7.11	Transferring phosphorus-containing groups
CotAD_56131	Leucine-rich repeat kinase family	899	20	0	55.85	10	F:GO:0005524; P:GO:0003006; C:GO:0009506; P:GO:0007275; P:GO:0007169; C:GO:0009505; F:GO:0004674; P:GO:0006468; C:GO:0005886; P:GO:0044702	F:ATP binding; P:developmental process involved in reproduction; C:plasmodesma; P:multicellular organism development; P:transmembrane receptor protein tyrosine kinase signaling pathway; C:plant-type cell wall; F:protein serine/threonine kinase activity; P:protein phosphorylation; C:plasma membrane; P:single organism reproductive process	EC:2.7.11	Transferring phosphorus-containing groups
CotAD_56263	Leucine-rich repeat receptor kinase family	583	20	3.04e-118	54.35	6	C:GO:0009506; F:GO:0005515; P:GO:0010183; F:GO:0016301; C:GO:0005886; C:GO:0090406	C:plasmodesma; F:protein binding; P:pollen tube guidance; F:kinase activity; C:plasma membrane; C:pollen tube
CotAD_56266	Leucine-rich receptor kinase family	659	20	1.05e-125	52.3	13	P:GO:0090558; P:GO:0048608; P:GO:0010183; P:GO:0009791; P:GO:0009653; C:GO:0005886; P:GO:0044702; C:GO:0009506; F:GO:0005515; P:GO:0048367; P:GO:0099402; F:GO:0016301; C:GO:0090406	P:plant epidermis development; P:reproductive structure development; P:pollen tube guidance; P:post-embryonic development; P:anatomical structure morphogenesis; C:plasma membrane; P:single organism reproductive process; C:plasmodesma; F:protein binding; P:shoot system development; P:plant organ development; F:kinase activity; C:pollen tube
CotAD_56591	Leucine-rich repeat kinase family	1140	20	0	56.5	10	P:GO:0002764; C:GO:0009507; F:GO:0005515; P:GO:0007275; P:GO:0010204; F:GO:0004672; P:GO:0016045; P:GO:0010359; P:GO:0009626; C:GO:0005886	P:immune response-regulating signaling pathway; C:chloroplast; F:protein binding; P:multicellular organism development; P:defense response signaling pathway, resistance gene-independent; F:protein kinase activity; P:detection of bacterium; P:regulation of anion channel activity; P:plant-type hypersensitive response; C:plasma membrane
CotAD_56592	Leucine-rich repeat kinase family	1025	20	0	58.7	13	F:GO:0004674; P:GO:0009626; C:GO:0005886; P:GO:0002764; C:GO:0009507; C:GO:0005768; F:GO:0005515; P:GO:0051179; F:GO:0019199; P:GO:0010204; P:GO:0016045; P:GO:0010359; P:GO:0016310	F:protein serine/threonine kinase activity; P:plant-type hypersensitive response; C:plasma membrane; P:immune response-regulating signaling pathway; C:chloroplast; C:endosome; F:protein binding; P:localization; F:transmembrane receptor protein kinase activity; P:defense response signaling pathway, resistance gene-independent; P:detection of bacterium; P:regulation of anion channel activity; P:pho…	EC:2.7.11	Transferring phosphorus-containing groups
CotAD_56595	Leucine-rich repeat kinase family	1031	20	0	59.15	10	P:GO:0002764; C:GO:0009507; F:GO:0005515; F:GO:0019199; P:GO:0010204; P:GO:0016045; P:GO:0010359; P:GO:0016310; P:GO:0009626; C:GO:0005886	P:immune response-regulating signaling pathway; C:chloroplast; F:protein binding; F:transmembrane receptor protein kinase activity; P:defense response signaling pathway, resistance gene-independent; P:detection of bacterium; P:regulation of anion channel activity; P:phosphorylation; P:plant-type hypersensitive response; C:plasma membrane	EC:2.7.11	Transferring phosphorus-containing groups
CotAD_56596	Leucine-rich repeat kinase family	760	20	0	59.05	10	P:GO:0002764; C:GO:0009507; F:GO:0005515; P:GO:0010204; F:GO:0004672; P:GO:0016045; P:GO:0010359; P:GO:0016310; P:GO:0009626; C:GO:0005886	P:immune response-regulating signaling pathway; C:chloroplast; F:protein binding; P:defense response signaling pathway, resistance gene-independent; F:protein kinase activity; P:detection of bacterium; P:regulation of anion channel activity; P:phosphorylation; P:plant-type hypersensitive response; C:plasma membrane
CotAD_56601	Leucine-rich repeat kinase family	1041	20	0	58.7	10	P:GO:0002764; C:GO:0009507; F:GO:0005515; F:GO:0019199; P:GO:0010204; P:GO:0016045; P:GO:0010359; P:GO:0016310; P:GO:0009626; C:GO:0005886	P:immune response-regulating signaling pathway; C:chloroplast; F:protein binding; F:transmembrane receptor protein kinase activity; P:defense response signaling pathway, resistance gene-independent; P:detection of bacterium; P:regulation of anion channel activity; P:phosphorylation; P:plant-type hypersensitive response; C:plasma membrane	EC:2.7.11	Transferring phosphorus-containing groups
CotAD_56602	Leucine-rich repeat kinase family	718	20	1.17e-143	54.9	7	C:GO:0009507; P:GO:0007165; F:GO:0004672; F:GO:0005488; C:GO:0005886; P:GO:0002376; P:GO:0050776	C:chloroplast; P:signal transduction; F:protein kinase activity; F:binding; C:plasma membrane; P:immune system process; P:regulation of immune response
CotAD_56976	Leucine-rich repeat kinase family	968	20	0	55.6	11	P:GO:0002764; C:GO:0009507; C:GO:0005768; F:GO:0005515; P:GO:0051179; F:GO:0019199; P:GO:0010204; P:GO:0016045; P:GO:0010359; P:GO:0009626; C:GO:0005886	P:immune response-regulating signaling pathway; C:chloroplast; C:endosome; F:protein binding; P:localization; F:transmembrane receptor protein kinase activity; P:defense response signaling pathway, resistance gene-independent; P:detection of bacterium; P:regulation of anion channel activity; P:plant-type hypersensitive response; C:plasma membrane	EC:2.7.11	Transferring phosphorus-containing groups
CotAD_56979	Leucine-rich repeat kinase family	1031	20	0	57	10	P:GO:0002764; C:GO:0009507; F:GO:0005515; F:GO:0019199; P:GO:0010204; C:GO:0012505; P:GO:0016045; P:GO:0010359; P:GO:0009626; C:GO:0005886	P:immune response-regulating signaling pathway; C:chloroplast; F:protein binding; F:transmembrane receptor protein kinase activity; P:defense response signaling pathway, resistance gene-independent; C:endomembrane system; P:detection of bacterium; P:regulation of anion channel activity; P:plant-type hypersensitive response; C:plasma membrane	EC:2.7.11	Transferring phosphorus-containing groups
CotAD_56980	Leucine-rich repeat kinase family	1021	20	0	58.2	11	P:GO:0002764; C:GO:0009507; C:GO:0005768; F:GO:0005515; P:GO:0051179; F:GO:0019199; P:GO:0010204; P:GO:0016045; P:GO:0010359; P:GO:0009626; C:GO:0005886	P:immune response-regulating signaling pathway; C:chloroplast; C:endosome; F:protein binding; P:localization; F:transmembrane receptor protein kinase activity; P:defense response signaling pathway, resistance gene-independent; P:detection of bacterium; P:regulation of anion channel activity; P:plant-type hypersensitive response; C:plasma membrane	EC:2.7.11	Transferring phosphorus-containing groups
CotAD_56981	Leucine-rich repeat kinase family	876	20	0	57	11	P:GO:0002764; C:GO:0009507; C:GO:0005768; F:GO:0005515; P:GO:0051179; F:GO:0019199; P:GO:0010204; P:GO:0016045; P:GO:0010359; P:GO:0009626; C:GO:0005886	P:immune response-regulating signaling pathway; C:chloroplast; C:endosome; F:protein binding; P:localization; F:transmembrane receptor protein kinase activity; P:defense response signaling pathway, resistance gene-independent; P:detection of bacterium; P:regulation of anion channel activity; P:plant-type hypersensitive response; C:plasma membrane	EC:2.7.11	Transferring phosphorus-containing groups
CotAD_56982	receptor kinase	1048	20	0	58.25	10	P:GO:0002764; C:GO:0009507; F:GO:0005515; P:GO:0010204; F:GO:0004672; P:GO:0016045; P:GO:0010359; P:GO:0016310; P:GO:0009626; C:GO:0005886	P:immune response-regulating signaling pathway; C:chloroplast; F:protein binding; P:defense response signaling pathway, resistance gene-independent; F:protein kinase activity; P:detection of bacterium; P:regulation of anion channel activity; P:phosphorylation; P:plant-type hypersensitive response; C:plasma membrane
CotAD_57023	Leucine-rich repeat kinase family	597	20	5.8e-64	46.95	4	C:GO:0016020; C:GO:0044444; P:GO:0009987; C:GO:0071944	C:membrane; C:cytoplasmic part; P:cellular process; C:cell periphery
CotAD_57105	receptor kinase	803	20	0	61.75	20	P:GO:0010051; P:GO:0009611; F:GO:0004383; P:GO:0007169; P:GO:0045851; F:GO:0004674; P:GO:0006468; C:GO:0005886; P:GO:0044702; P:GO:0009755; F:GO:0001653; F:GO:0005524; P:GO:0003006; C:GO:0009507; P:GO:0009826; F:GO:0004888; F:GO:0005515; P:GO:0045087; C:GO:0016021; P:GO:0031347	P:xylem and phloem pattern formation; P:response to wounding; F:guanylate cyclase activity; P:transmembrane receptor protein tyrosine kinase signaling pathway; P:pH reduction; F:protein serine/threonine kinase activity; P:protein phosphorylation; C:plasma membrane; P:single organism reproductive process; P:hormone-mediated signaling pathway; F:peptide receptor activity; F:ATP binding; P:developme…	EC:2.7.11; EC:4.6.1.2	Transferring phosphorus-containing groups; Guanylate cyclase
CotAD_57195	Leucine-rich repeat kinase family	932	20	0	60.9	6	F:GO:0005524; C:GO:0009506; C:GO:0016021; F:GO:0004674; P:GO:0006468; C:GO:0005886	F:ATP binding; C:plasmodesma; C:integral component of membrane; F:protein serine/threonine kinase activity; P:protein phosphorylation; C:plasma membrane	EC:2.7.11	Transferring phosphorus-containing groups
CotAD_57276	Leucine-rich repeat kinase family	584	20	0	62.2	12	F:GO:0005524; C:GO:0009506; P:GO:0009737; C:GO:0005739; P:GO:2000605; P:GO:0007169; P:GO:0009610; C:GO:0005774; C:GO:0009505; F:GO:0004674; P:GO:0006468; C:GO:0046658	F:ATP binding; C:plasmodesma; P:response to abscisic acid; C:mitochondrion; P:positive regulation of secondary growth; P:transmembrane receptor protein tyrosine kinase signaling pathway; P:response to symbiotic fungus; C:vacuolar membrane; C:plant-type cell wall; F:protein serine/threonine kinase activity; P:protein phosphorylation; C:anchored component of plasma membrane	EC:2.7.11	Transferring phosphorus-containing groups
CotAD_57447	receptor kinase	1043	20	0	52.15	12	P:GO:0009617; C:GO:0005768; P:GO:0051179; P:GO:0007165; P:GO:0048856; P:GO:0033554; F:GO:0004672; F:GO:0005488; P:GO:0006952; C:GO:0005886; P:GO:0002376; P:GO:0050776	P:response to bacterium; C:endosome; P:localization; P:signal transduction; P:anatomical structure development; P:cellular response to stress; F:protein kinase activity; F:binding; P:defense response; C:plasma membrane; P:immune system process; P:regulation of immune response
CotAD_57458	Leucine-rich repeat kinase family	606	20	0	75	26	P:GO:0009793; P:GO:0007030; P:GO:0009556; P:GO:0046777; P:GO:0060548; F:GO:0005524; C:GO:0005768; P:GO:0008219; F:GO:0046982; P:GO:0050832; F:GO:0033612; P:GO:0010152; F:GO:0042802; P:GO:1900140; P:GO:0010150; P:GO:0007169; P:GO:0009742; C:GO:0043234; P:GO:0042742; C:GO:0005886; F:GO:0004675; P:GO:0002229; C:GO:0016021; P:GO:0010227; P:GO:0010200; P:GO:0016049	P:embryo development ending in seed dormancy; P:Golgi organization; P:microsporogenesis; P:protein autophosphorylation; P:negative regulation of cell death; F:ATP binding; C:endosome; P:cell death; F:protein heterodimerization activity; P:defense response to fungus; F:receptor serine/threonine kinase binding; P:pollen maturation; F:identical protein binding; P:regulation of seedling development; …	EC:2.7.11	Transferring phosphorus-containing groups
CotAD_57664	Leucine-rich repeat kinase family	628	20	0	63.7	12	F:GO:0005524; C:GO:0009506; P:GO:0009737; C:GO:0005739; P:GO:2000605; P:GO:0007169; C:GO:0005576; C:GO:0005774; C:GO:0009505; F:GO:0004674; P:GO:0006468; C:GO:0046658	F:ATP binding; C:plasmodesma; P:response to abscisic acid; C:mitochondrion; P:positive regulation of secondary growth; P:transmembrane receptor protein tyrosine kinase signaling pathway; C:extracellular region; C:vacuolar membrane; C:plant-type cell wall; F:protein serine/threonine kinase activity; P:protein phosphorylation; C:anchored component of plasma membrane	EC:2.7.11	Transferring phosphorus-containing groups
CotAD_57775	Leucine-rich receptor kinase family	1078	20	0	64	6	F:GO:0005515; P:GO:0010082; P:GO:0010449; F:GO:0004672; C:GO:0005886; P:GO:0009987	F:protein binding; P:regulation of root meristem growth; P:root meristem growth; F:protein kinase activity; C:plasma membrane; P:cellular process
CotAD_57832	Leucine-rich receptor kinase family	1005	20	0	58.4	23	P:GO:0007172; P:GO:0010082; P:GO:0010183; P:GO:0007169; P:GO:0046777; P:GO:0048437; C:GO:0000325; F:GO:0004674; P:GO:0009934; F:GO:0043621; C:GO:0005886; P:GO:0051301; F:GO:0005524; C:GO:0009506; P:GO:0010449; P:GO:0001944; C:GO:0016021; P:GO:0030154; P:GO:0010067; P:GO:0010089; F:GO:0033612; C:GO:0090406; P:GO:0010223	P:signal complex assembly; P:regulation of root meristem growth; P:pollen tube guidance; P:transmembrane receptor protein tyrosine kinase signaling pathway; P:protein autophosphorylation; P:floral organ development; C:plant-type vacuole; F:protein serine/threonine kinase activity; P:regulation of meristem structural organization; F:protein self-association; C:plasma membrane; P:cell division; F:A…	EC:2.7.11	Transferring phosphorus-containing groups
CotAD_58185	receptor kinase	724	20	0	61.15	23	P:GO:0007172; P:GO:1902025; P:GO:0010051; P:GO:0046777; C:GO:0000325; F:GO:0004674; P:GO:0009934; F:GO:0043621; C:GO:0005886; P:GO:0051301; P:GO:0045490; C:GO:0009506; P:GO:0001944; P:GO:0010468; P:GO:0030154; F:GO:0017046; P:GO:0010227; P:GO:0010067; P:GO:0010089; F:GO:0033612; P:GO:0090548; P:GO:0010102; P:GO:0010223	P:signal complex assembly; P:nitrate import; P:xylem and phloem pattern formation; P:protein autophosphorylation; C:plant-type vacuole; F:protein serine/threonine kinase activity; P:regulation of meristem structural organization; F:protein self-association; C:plasma membrane; P:cell division; P:pectin catabolic process; C:plasmodesma; P:vasculature development; P:regulation of gene expression; P:…	EC:2.7.11	Transferring phosphorus-containing groups
CotAD_58704	Leucine-rich repeat kinase family	655	20	0	60.9	6	F:GO:0005524; P:GO:0007169; C:GO:0005576; F:GO:0004674; P:GO:0006468; C:GO:0005886	F:ATP binding; P:transmembrane receptor protein tyrosine kinase signaling pathway; C:extracellular region; F:protein serine/threonine kinase activity; P:protein phosphorylation; C:plasma membrane	EC:2.7.11	Transferring phosphorus-containing groups
CotAD_59243	Leucine-rich receptor kinase family	1021	20	0	59.3	23	P:GO:0010075; P:GO:0007172; P:GO:0010183; P:GO:0007169; P:GO:0046777; P:GO:0048437; C:GO:0000325; F:GO:0004674; P:GO:0009934; F:GO:0043621; C:GO:0005886; P:GO:0048364; P:GO:0051301; F:GO:0005524; C:GO:0009506; P:GO:0001944; C:GO:0016021; P:GO:0030154; P:GO:0010067; P:GO:0010089; F:GO:0033612; C:GO:0090406; P:GO:0010223	P:regulation of meristem growth; P:signal complex assembly; P:pollen tube guidance; P:transmembrane receptor protein tyrosine kinase signaling pathway; P:protein autophosphorylation; P:floral organ development; C:plant-type vacuole; F:protein serine/threonine kinase activity; P:regulation of meristem structural organization; F:protein self-association; C:plasma membrane; P:root development; P:cel…	EC:2.7.11	Transferring phosphorus-containing groups
CotAD_59281	G-type lectin S-receptor-like Serine Threonine-kinase	838	20	6.96e-162	65.15	12	P:GO:0009816; F:GO:0005516; C:GO:0009506; F:GO:0031625; P:GO:0007154; P:GO:0071446; P:GO:0009555; P:GO:0046777; C:GO:0009505; F:GO:0004674; F:GO:0030246; C:GO:0005886	P:defense response to bacterium, incompatible interaction; F:calmodulin binding; C:plasmodesma; F:ubiquitin protein ligase binding; P:cell communication; P:cellular response to salicylic acid stimulus; P:pollen development; P:protein autophosphorylation; C:plant-type cell wall; F:protein serine/threonine kinase activity; F:carbohydrate binding; C:plasma membrane	EC:2.7.11	Transferring phosphorus-containing groups
CotAD_59386	Leucine-rich receptor kinase family	980	20	0	64.3	24	P:GO:0010075; P:GO:0007172; P:GO:0010183; P:GO:0007169; P:GO:0046777; P:GO:0048437; C:GO:0000325; P:GO:0009934; F:GO:0043621; P:GO:0009845; C:GO:0005886; P:GO:0051301; F:GO:0005524; P:GO:0006979; F:GO:0004702; C:GO:0009506; P:GO:0001944; C:GO:0016021; P:GO:0030154; P:GO:0010067; P:GO:0010089; F:GO:0033612; C:GO:0090406; P:GO:0010223	P:regulation of meristem growth; P:signal complex assembly; P:pollen tube guidance; P:transmembrane receptor protein tyrosine kinase signaling pathway; P:protein autophosphorylation; P:floral organ development; C:plant-type vacuole; P:regulation of meristem structural organization; F:protein self-association; P:seed germination; C:plasma membrane; P:cell division; F:ATP binding; P:response to oxi…	EC:2.7.11	Transferring phosphorus-containing groups
CotAD_59521	Leucine-rich repeat kinase family	606	20	0	66.85	14	P:GO:0007169; P:GO:0009610; C:GO:0005576; C:GO:0005774; C:GO:0009505; F:GO:0004674; P:GO:0006468; P:GO:0009834; C:GO:0046658; F:GO:0005524; C:GO:0009506; P:GO:0009737; P:GO:2000605; C:GO:0005829	P:transmembrane receptor protein tyrosine kinase signaling pathway; P:response to symbiotic fungus; C:extracellular region; C:vacuolar membrane; C:plant-type cell wall; F:protein serine/threonine kinase activity; P:protein phosphorylation; P:plant-type secondary cell wall biogenesis; C:anchored component of plasma membrane; F:ATP binding; C:plasmodesma; P:response to abscisic acid; P:positive reg…	EC:2.7.11	Transferring phosphorus-containing groups
CotAD_59559	receptor kinase	1141	20	0	57.85	10	C:GO:0043229; F:GO:0005524; P:GO:0007169; P:GO:0000226; F:GO:0004674; P:GO:0006468; C:GO:0009504; C:GO:0005886; P:GO:0010103; C:GO:0043227	C:intracellular organelle; F:ATP binding; P:transmembrane receptor protein tyrosine kinase signaling pathway; P:microtubule cytoskeleton organization; F:protein serine/threonine kinase activity; P:protein phosphorylation; C:cell plate; C:plasma membrane; P:stomatal complex morphogenesis; C:membrane-bounded organelle	EC:2.7.11	Transferring phosphorus-containing groups
CotAD_59591	leucine-rich repeat receptor	1135	20	0	58.85	26	P:GO:0048657; P:GO:0060548; F:GO:0005496; P:GO:0006468; P:GO:0009911; P:GO:0009734; P:GO:0009729; F:GO:0005524; P:GO:0009826; C:GO:0005768; F:GO:0046982; P:GO:0048366; P:GO:0010233; P:GO:1900140; F:GO:0042803; P:GO:0007169; P:GO:0009742; C:GO:0043234; C:GO:0005886; F:GO:0004675; C:GO:0005739; C:GO:0016021; P:GO:0010305; P:GO:0010584; P:GO:0010224; P:GO:0010268	P:anther wall tapetum cell differentiation; P:negative regulation of cell death; F:steroid binding; P:protein phosphorylation; P:positive regulation of flower development; P:auxin-activated signaling pathway; P:detection of brassinosteroid stimulus; F:ATP binding; P:unidimensional cell growth; C:endosome; F:protein heterodimerization activity; P:leaf development; P:phloem transport; P:regulation …	EC:2.7.11	Transferring phosphorus-containing groups
CotAD_59737	Leucine-rich repeat kinase family	972	20	0	56.85	10	P:GO:0002764; C:GO:0009507; F:GO:0005515; P:GO:0010204; P:GO:0048856; F:GO:0004672; P:GO:0016045; P:GO:0010359; P:GO:0009626; C:GO:0005886	P:immune response-regulating signaling pathway; C:chloroplast; F:protein binding; P:defense response signaling pathway, resistance gene-independent; P:anatomical structure development; F:protein kinase activity; P:detection of bacterium; P:regulation of anion channel activity; P:plant-type hypersensitive response; C:plasma membrane
CotAD_60026	receptor-kinase isolog	673	20	0	66.4	6	F:GO:0005524; C:GO:0016021; P:GO:0007169; F:GO:0004674; P:GO:0006468; C:GO:0005886	F:ATP binding; C:integral component of membrane; P:transmembrane receptor protein tyrosine kinase signaling pathway; F:protein serine/threonine kinase activity; P:protein phosphorylation; C:plasma membrane	EC:2.7.11	Transferring phosphorus-containing groups
CotAD_60304	Leucine-rich repeat kinase family	906	20	0	60.3	8	F:GO:0005524; C:GO:0009506; P:GO:0048856; P:GO:0007169; C:GO:0009505; F:GO:0004674; P:GO:0006468; C:GO:0005886	F:ATP binding; C:plasmodesma; P:anatomical structure development; P:transmembrane receptor protein tyrosine kinase signaling pathway; C:plant-type cell wall; F:protein serine/threonine kinase activity; P:protein phosphorylation; C:plasma membrane	EC:2.7.11	Transferring phosphorus-containing groups
CotAD_60417	Leucine-rich repeat kinase family	659	20	0	65.1	12	F:GO:0005524; C:GO:0009506; C:GO:0005739; P:GO:2000605; C:GO:0016021; P:GO:0007169; C:GO:0005576; C:GO:0005774; C:GO:0009505; F:GO:0004674; P:GO:0006468; C:GO:0005886	F:ATP binding; C:plasmodesma; C:mitochondrion; P:positive regulation of secondary growth; C:integral component of membrane; P:transmembrane receptor protein tyrosine kinase signaling pathway; C:extracellular region; C:vacuolar membrane; C:plant-type cell wall; F:protein serine/threonine kinase activity; P:protein phosphorylation; C:plasma membrane	EC:2.7.11	Transferring phosphorus-containing groups
CotAD_60544	Leucine-rich repeat receptor kinase family	591	20	1.28e-176	58.1	8	C:GO:0009506; F:GO:0005515; P:GO:0010082; P:GO:0010183; F:GO:0004672; C:GO:0005886; P:GO:0009987; C:GO:0090406	C:plasmodesma; F:protein binding; P:regulation of root meristem growth; P:pollen tube guidance; F:protein kinase activity; C:plasma membrane; P:cellular process; C:pollen tube
CotAD_60611	Leucine-rich repeat kinase family	979	20	0	58.35	9	C:GO:0009506; F:GO:0005515; P:GO:0048731; P:GO:0007165; P:GO:0009555; C:GO:0005794; C:GO:0009505; C:GO:0005886; F:GO:0004675	C:plasmodesma; F:protein binding; P:system development; P:signal transduction; P:pollen development; C:Golgi apparatus; C:plant-type cell wall; C:plasma membrane; F:transmembrane receptor protein serine/threonine kinase activity	EC:2.7.11	Transferring phosphorus-containing groups
CotAD_60729	Leucine-rich receptor kinase family	976	20	0	55.9	10	C:GO:0009506; F:GO:0005515; P:GO:0048731; P:GO:0010183; F:GO:0004672; P:GO:0050789; C:GO:0005886; P:GO:0009888; P:GO:0009987; C:GO:0090406	C:plasmodesma; F:protein binding; P:system development; P:pollen tube guidance; F:protein kinase activity; P:regulation of biological process; C:plasma membrane; P:tissue development; P:cellular process; C:pollen tube
CotAD_60775	Leucine-rich repeat kinase family	634	20	1.34e-130	54.15	9	C:GO:0043231; C:GO:0005618; C:GO:0044444; F:GO:0016301; P:GO:0050789; C:GO:0005886; C:GO:0031224; P:GO:0009987; P:GO:0050896	C:intracellular membrane-bounded organelle; C:cell wall; C:cytoplasmic part; F:kinase activity; P:regulation of biological process; C:plasma membrane; C:intrinsic component of membrane; P:cellular process; P:response to stimulus
CotAD_60782	Leucine-rich repeat receptor kinase family	872	20	0	51.85	8	C:GO:0009506; F:GO:0005515; P:GO:0048731; P:GO:0010183; F:GO:0016301; C:GO:0005886; P:GO:0009888; C:GO:0090406	C:plasmodesma; F:protein binding; P:system development; P:pollen tube guidance; F:kinase activity; C:plasma membrane; P:tissue development; C:pollen tube
CotAD_60784	Leucine-rich repeat kinase family	234	20	1.93e-32	47.3	8	P:GO:0003006; C:GO:0016020; P:GO:0048856; C:GO:0044464; F:GO:0005488; F:GO:0016301; P:GO:0050896; P:GO:0032501	P:developmental process involved in reproduction; C:membrane; P:anatomical structure development; C:cell part; F:binding; F:kinase activity; P:response to stimulus; P:multicellular organismal process
CotAD_60788	Leucine-rich repeat receptor kinase family	708	20	1.31e-134	53.4	8	C:GO:0009506; F:GO:0005515; P:GO:0048731; P:GO:0010183; F:GO:0004672; P:GO:0006468; C:GO:0005886; C:GO:0090406	C:plasmodesma; F:protein binding; P:system development; P:pollen tube guidance; F:protein kinase activity; P:protein phosphorylation; C:plasma membrane; C:pollen tube
CotAD_61336	Leucine-rich repeat kinase family	819	20	0	61.75	7	F:GO:0005524; C:GO:0016021; P:GO:0007169; C:GO:0005576; F:GO:0004674; P:GO:0006468; C:GO:0005886	F:ATP binding; C:integral component of membrane; P:transmembrane receptor protein tyrosine kinase signaling pathway; C:extracellular region; F:protein serine/threonine kinase activity; P:protein phosphorylation; C:plasma membrane	EC:2.7.11	Transferring phosphorus-containing groups
CotAD_61551	Leucine-rich repeat kinase family	636	20	0	64.05	13	P:GO:0007169; P:GO:0009610; C:GO:0005576; C:GO:0005774; C:GO:0009505; F:GO:0004674; P:GO:0006468; C:GO:0046658; F:GO:0005524; C:GO:0009506; P:GO:0009737; P:GO:2000605; C:GO:0005829	P:transmembrane receptor protein tyrosine kinase signaling pathway; P:response to symbiotic fungus; C:extracellular region; C:vacuolar membrane; C:plant-type cell wall; F:protein serine/threonine kinase activity; P:protein phosphorylation; C:anchored component of plasma membrane; F:ATP binding; C:plasmodesma; P:response to abscisic acid; P:positive regulation of secondary growth; C:cytosol	EC:2.7.11	Transferring phosphorus-containing groups
CotAD_62456	Leucine-rich receptor kinase family	1124	20	0	64.45	8	F:GO:0005524; F:GO:0005515; P:GO:0010082; P:GO:0010449; P:GO:0007169; F:GO:0004674; P:GO:0006468; C:GO:0005886	F:ATP binding; F:protein binding; P:regulation of root meristem growth; P:root meristem growth; P:transmembrane receptor protein tyrosine kinase signaling pathway; F:protein serine/threonine kinase activity; P:protein phosphorylation; C:plasma membrane	EC:2.7.11	Transferring phosphorus-containing groups
CotAD_62468	Leucine-rich repeat kinase family	605	20	0	75.05	22	P:GO:0010152; F:GO:0042802; P:GO:0009793; P:GO:0007030; P:GO:0009556; P:GO:0007169; P:GO:0009742; P:GO:0046777; C:GO:0043234; P:GO:0042742; C:GO:0005886; F:GO:0004675; F:GO:0005524; C:GO:0005768; P:GO:0008219; F:GO:0046982; P:GO:0002229; C:GO:0016021; P:GO:0010227; P:GO:0050832; F:GO:0033612; P:GO:0016049	P:pollen maturation; F:identical protein binding; P:embryo development ending in seed dormancy; P:Golgi organization; P:microsporogenesis; P:transmembrane receptor protein tyrosine kinase signaling pathway; P:brassinosteroid mediated signaling pathway; P:protein autophosphorylation; C:protein complex; P:defense response to bacterium; C:plasma membrane; F:transmembrane receptor protein serine/thre…	EC:2.7.11	Transferring phosphorus-containing groups
CotAD_62511	Leucine-rich repeat kinase family	705	20	0	59.7	11	C:GO:0009570; F:GO:0005524; F:GO:0005515; C:GO:0016021; P:GO:0007169; P:GO:0046777; C:GO:0009505; F:GO:0004674; C:GO:0005886; C:GO:0090406; P:GO:0010069	C:chloroplast stroma; F:ATP binding; F:protein binding; C:integral component of membrane; P:transmembrane receptor protein tyrosine kinase signaling pathway; P:protein autophosphorylation; C:plant-type cell wall; F:protein serine/threonine kinase activity; C:plasma membrane; C:pollen tube; P:zygote asymmetric cytokinesis in embryo sac	EC:2.7.11	Transferring phosphorus-containing groups
CotAD_62520	Leucine-rich repeat kinase family	644	20	0	61.95	13	P:GO:0007169; P:GO:0009610; C:GO:0005576; C:GO:0005774; C:GO:0009505; F:GO:0004674; P:GO:0006468; P:GO:0009834; C:GO:0046658; F:GO:0005524; C:GO:0009506; P:GO:0009737; P:GO:2000605	P:transmembrane receptor protein tyrosine kinase signaling pathway; P:response to symbiotic fungus; C:extracellular region; C:vacuolar membrane; C:plant-type cell wall; F:protein serine/threonine kinase activity; P:protein phosphorylation; P:plant-type secondary cell wall biogenesis; C:anchored component of plasma membrane; F:ATP binding; C:plasmodesma; P:response to abscisic acid; P:positive reg…	EC:2.7.11	Transferring phosphorus-containing groups
CotAD_62571	Leucine-rich repeat kinase family	977	20	0	70.75	7	F:GO:0005524; C:GO:0009507; P:GO:0007169; C:GO:0005576; F:GO:0004674; P:GO:0006468; C:GO:0005886	F:ATP binding; C:chloroplast; P:transmembrane receptor protein tyrosine kinase signaling pathway; C:extracellular region; F:protein serine/threonine kinase activity; P:protein phosphorylation; C:plasma membrane	EC:2.7.11	Transferring phosphorus-containing groups
CotAD_62836	leucine-rich repeat receptor	690	20	0	65.65	9	C:GO:0005634; F:GO:0005524; C:GO:0009506; C:GO:0005829; P:GO:0007169; C:GO:0005576; P:GO:0006468; C:GO:0005886; F:GO:0004675	C:nucleus; F:ATP binding; C:plasmodesma; C:cytosol; P:transmembrane receptor protein tyrosine kinase signaling pathway; C:extracellular region; P:protein phosphorylation; C:plasma membrane; F:transmembrane receptor protein serine/threonine kinase activity	EC:2.7.11	Transferring phosphorus-containing groups
CotAD_63133	Leucine-rich repeat kinase family	669	20	0	55.5	6	F:GO:0005524; C:GO:0016021; P:GO:0007169; F:GO:0004674; P:GO:0006468; C:GO:0005886	F:ATP binding; C:integral component of membrane; P:transmembrane receptor protein tyrosine kinase signaling pathway; F:protein serine/threonine kinase activity; P:protein phosphorylation; C:plasma membrane	EC:2.7.11	Transferring phosphorus-containing groups
CotAD_63155	Leucine-rich repeat kinase family	624	20	0	76.25	20	P:GO:0010152; F:GO:0042802; P:GO:0009793; P:GO:0007030; P:GO:0010150; P:GO:0009556; P:GO:0007169; P:GO:0009742; P:GO:0046777; C:GO:0043234; C:GO:0005576; C:GO:0005886; F:GO:0004675; F:GO:0005524; F:GO:0004713; C:GO:0016021; P:GO:0016032; P:GO:0051607; P:GO:0010227; F:GO:0033612	P:pollen maturation; F:identical protein binding; P:embryo development ending in seed dormancy; P:Golgi organization; P:leaf senescence; P:microsporogenesis; P:transmembrane receptor protein tyrosine kinase signaling pathway; P:brassinosteroid mediated signaling pathway; P:protein autophosphorylation; C:protein complex; C:extracellular region; C:plasma membrane; F:transmembrane receptor protein s…	EC:2.7.10; EC:2.7.11	Transferring phosphorus-containing groups; Transferring phosphorus-containing groups
CotAD_63311	Leucine-rich repeat kinase family	744	20	3.12e-144	53.25	11	P:GO:0009617; C:GO:0005768; P:GO:0051179; P:GO:0007165; P:GO:0033554; F:GO:0004672; F:GO:0005488; P:GO:0006952; C:GO:0005886; P:GO:0002376; P:GO:0050776	P:response to bacterium; C:endosome; P:localization; P:signal transduction; P:cellular response to stress; F:protein kinase activity; F:binding; P:defense response; C:plasma membrane; P:immune system process; P:regulation of immune response
CotAD_63312	receptor kinase	979	20	4.62e-166	51.6	12	P:GO:0009617; C:GO:0005768; P:GO:0051179; P:GO:0007165; C:GO:0016020; P:GO:0048856; P:GO:0033554; F:GO:0004672; F:GO:0005488; P:GO:0006952; P:GO:0002376; P:GO:0050776	P:response to bacterium; C:endosome; P:localization; P:signal transduction; C:membrane; P:anatomical structure development; P:cellular response to stress; F:protein kinase activity; F:binding; P:defense response; P:immune system process; P:regulation of immune response
CotAD_63477	Leucine-rich repeat kinase family	741	20	0	58.7	4	C:GO:0005739; C:GO:0016020; F:GO:0004672; P:GO:0009987	C:mitochondrion; C:membrane; F:protein kinase activity; P:cellular process
CotAD_63572	Leucine-rich repeat kinase family	629	20	0	57.3	13	C:GO:0090404; F:GO:0042802; P:GO:0009860; P:GO:0010183; C:GO:0044444; F:GO:0004674; P:GO:0009846; C:GO:0009506; C:GO:0005618; P:GO:0016310; C:GO:0016324; C:GO:0031224; P:GO:0080092	C:pollen tube tip; F:identical protein binding; P:pollen tube growth; P:pollen tube guidance; C:cytoplasmic part; F:protein serine/threonine kinase activity; P:pollen germination; C:plasmodesma; C:cell wall; P:phosphorylation; C:apical plasma membrane; C:intrinsic component of membrane; P:regulation of pollen tube growth	EC:2.7.11	Transferring phosphorus-containing groups
CotAD_64056	Leucine-rich receptor kinase family	994	20	0	62	18	P:GO:1902025; P:GO:0010183; P:GO:0007169; P:GO:0046777; F:GO:0042277; F:GO:0004674; P:GO:0009845; C:GO:0005886; F:GO:0005524; P:GO:0006979; P:GO:0045490; F:GO:0005515; P:GO:0001944; P:GO:0010468; P:GO:0010227; P:GO:0090548; C:GO:0090406; P:GO:0010102	P:nitrate import; P:pollen tube guidance; P:transmembrane receptor protein tyrosine kinase signaling pathway; P:protein autophosphorylation; F:peptide binding; F:protein serine/threonine kinase activity; P:seed germination; C:plasma membrane; F:ATP binding; P:response to oxidative stress; P:pectin catabolic process; F:protein binding; P:vasculature development; P:regulation of gene expression; P:…	EC:2.7.11	Transferring phosphorus-containing groups
CotAD_64199	Leucine-rich repeat kinase family	782	20	0	60.05	7	F:GO:0005524; C:GO:0005739; C:GO:0016021; P:GO:0007169; F:GO:0004674; P:GO:0006468; C:GO:0005886	F:ATP binding; C:mitochondrion; C:integral component of membrane; P:transmembrane receptor protein tyrosine kinase signaling pathway; F:protein serine/threonine kinase activity; P:protein phosphorylation; C:plasma membrane	EC:2.7.11	Transferring phosphorus-containing groups
CotAD_64227	Leucine-rich repeat receptor kinase family	770	20	0	58	12	P:GO:0090558; C:GO:0009506; F:GO:0005515; P:GO:0048608; P:GO:0048367; P:GO:0010183; P:GO:0009791; F:GO:0004672; C:GO:0005886; P:GO:0009987; P:GO:0044702; C:GO:0090406	P:plant epidermis development; C:plasmodesma; F:protein binding; P:reproductive structure development; P:shoot system development; P:pollen tube guidance; P:post-embryonic development; F:protein kinase activity; C:plasma membrane; P:cellular process; P:single organism reproductive process; C:pollen tube
CotAD_64544	Leucine-rich repeat kinase family	638	20	0	73.05	19	P:GO:0010152; F:GO:0042802; P:GO:0009793; P:GO:0007030; P:GO:0010150; P:GO:0009556; P:GO:0009742; P:GO:0046777; P:GO:0007166; C:GO:0043234; C:GO:0005576; C:GO:0005886; F:GO:0004675; F:GO:0005524; F:GO:0004713; C:GO:0016021; P:GO:0051607; P:GO:0010227; F:GO:0033612	P:pollen maturation; F:identical protein binding; P:embryo development ending in seed dormancy; P:Golgi organization; P:leaf senescence; P:microsporogenesis; P:brassinosteroid mediated signaling pathway; P:protein autophosphorylation; P:cell surface receptor signaling pathway; C:protein complex; C:extracellular region; C:plasma membrane; F:transmembrane receptor protein serine/threonine kinase ac…	EC:2.7.10; EC:2.7.11	Transferring phosphorus-containing groups; Transferring phosphorus-containing groups
CotAD_65075	Leucine-rich receptor kinase family	621	20	0	66.45	21	P:GO:1902025; P:GO:0010051; P:GO:0010183; P:GO:0007169; P:GO:0046777; P:GO:0009960; F:GO:0004674; P:GO:0009845; C:GO:0005886; F:GO:0005524; P:GO:0006979; P:GO:0045490; F:GO:0005515; P:GO:0001944; C:GO:0016021; P:GO:0010468; F:GO:0017046; P:GO:0010227; P:GO:0090548; C:GO:0090406; P:GO:0010102	P:nitrate import; P:xylem and phloem pattern formation; P:pollen tube guidance; P:transmembrane receptor protein tyrosine kinase signaling pathway; P:protein autophosphorylation; P:endosperm development; F:protein serine/threonine kinase activity; P:seed germination; C:plasma membrane; F:ATP binding; P:response to oxidative stress; P:pectin catabolic process; F:protein binding; P:vasculature deve…	EC:2.7.11	Transferring phosphorus-containing groups
CotAD_65393	leucine-rich repeat receptor	724	20	0	65.7	8	C:GO:0005634; F:GO:0005524; C:GO:0005829; P:GO:0007169; C:GO:0005576; P:GO:0006468; C:GO:0005886; F:GO:0004675	C:nucleus; F:ATP binding; C:cytosol; P:transmembrane receptor protein tyrosine kinase signaling pathway; C:extracellular region; P:protein phosphorylation; C:plasma membrane; F:transmembrane receptor protein serine/threonine kinase activity	EC:2.7.11	Transferring phosphorus-containing groups
CotAD_65496	receptor kinase	834	20	3.3e-151	51.05	12	P:GO:0048364; P:GO:0003006; P:GO:0009605; P:GO:0048367; C:GO:0016020; P:GO:0009791; C:GO:0044464; F:GO:0042277; P:GO:0009653; P:GO:0051704; P:GO:0048507; P:GO:0050789	P:root development; P:developmental process involved in reproduction; P:response to external stimulus; P:shoot system development; C:membrane; P:post-embryonic development; C:cell part; F:peptide binding; P:anatomical structure morphogenesis; P:multi-organism process; P:meristem development; P:regulation of biological process
CotAD_65914	Leucine-rich repeat kinase family	661	20	0	64.3	12	F:GO:0005524; C:GO:0009506; P:GO:0009737; C:GO:0005739; P:GO:2000605; P:GO:0007169; C:GO:0005576; C:GO:0005774; C:GO:0009505; F:GO:0004674; P:GO:0006468; C:GO:0046658	F:ATP binding; C:plasmodesma; P:response to abscisic acid; C:mitochondrion; P:positive regulation of secondary growth; P:transmembrane receptor protein tyrosine kinase signaling pathway; C:extracellular region; C:vacuolar membrane; C:plant-type cell wall; F:protein serine/threonine kinase activity; P:protein phosphorylation; C:anchored component of plasma membrane	EC:2.7.11	Transferring phosphorus-containing groups
CotAD_66191	Leucine-rich repeat transmembrane kinase	1275	20	0	55.45	15	F:GO:0042802; P:GO:0010051; P:GO:0009556; F:GO:0046983; P:GO:0009741; F:GO:0004674; P:GO:0009755; C:GO:0009507; C:GO:0005768; P:GO:0032989; F:GO:0097159; F:GO:0019199; C:GO:0016020; P:GO:0048580; P:GO:0010234	F:identical protein binding; P:xylem and phloem pattern formation; P:microsporogenesis; F:protein dimerization activity; P:response to brassinosteroid; F:protein serine/threonine kinase activity; P:hormone-mediated signaling pathway; C:chloroplast; C:endosome; P:cellular component morphogenesis; F:organic cyclic compound binding; F:transmembrane receptor protein kinase activity; C:membrane; P:reg…	EC:2.7.11	Transferring phosphorus-containing groups
CotAD_66284	Leucine-rich repeat receptor kinase family	1126	20	0	53.9	6	C:GO:0009506; F:GO:0005515; P:GO:0007275; P:GO:0010183; C:GO:0005886; C:GO:0090406	C:plasmodesma; F:protein binding; P:multicellular organism development; P:pollen tube guidance; C:plasma membrane; C:pollen tube
CotAD_66287	Leucine-rich repeat receptor kinase family	799	20	1.43e-170	53.3	11	P:GO:0090558; C:GO:0009506; F:GO:0005515; P:GO:0048608; P:GO:0048367; P:GO:0010183; P:GO:0009791; F:GO:0016301; C:GO:0005886; P:GO:0044702; C:GO:0090406	P:plant epidermis development; C:plasmodesma; F:protein binding; P:reproductive structure development; P:shoot system development; P:pollen tube guidance; P:post-embryonic development; F:kinase activity; C:plasma membrane; P:single organism reproductive process; C:pollen tube
CotAD_66289	Leucine-rich repeat receptor kinase family	824	20	8.79e-177	53.7	11	P:GO:0090558; C:GO:0009506; F:GO:0005515; P:GO:0048608; P:GO:0048367; P:GO:0010183; P:GO:0009791; F:GO:0016301; C:GO:0005886; P:GO:0044702; C:GO:0090406	P:plant epidermis development; C:plasmodesma; F:protein binding; P:reproductive structure development; P:shoot system development; P:pollen tube guidance; P:post-embryonic development; F:kinase activity; C:plasma membrane; P:single organism reproductive process; C:pollen tube
CotAD_66457	Leucine-rich repeat transmembrane kinase	1015	20	0	69.85	9	F:GO:0005524; C:GO:0009506; F:GO:0005515; P:GO:0045088; P:GO:0007169; P:GO:0009861; F:GO:0004674; P:GO:0006468; C:GO:0005886	F:ATP binding; C:plasmodesma; F:protein binding; P:regulation of innate immune response; P:transmembrane receptor protein tyrosine kinase signaling pathway; P:jasmonic acid and ethylene-dependent systemic resistance; F:protein serine/threonine kinase activity; P:protein phosphorylation; C:plasma membrane	EC:2.7.11	Transferring phosphorus-containing groups
CotAD_66459	Leucine-rich repeat transmembrane kinase	927	20	0	71.2	10	F:GO:0005524; C:GO:0009506; F:GO:0005515; P:GO:0045088; P:GO:0007169; P:GO:0009861; C:GO:0005576; F:GO:0004674; P:GO:0006468; C:GO:0005886	F:ATP binding; C:plasmodesma; F:protein binding; P:regulation of innate immune response; P:transmembrane receptor protein tyrosine kinase signaling pathway; P:jasmonic acid and ethylene-dependent systemic resistance; C:extracellular region; F:protein serine/threonine kinase activity; P:protein phosphorylation; C:plasma membrane	EC:2.7.11	Transferring phosphorus-containing groups
CotAD_66464	Leucine-rich repeat transmembrane kinase	661	20	0	61	7	C:GO:0009506; F:GO:0005515; P:GO:0045088; P:GO:0009861; P:GO:0016310; F:GO:0004674; C:GO:0005886	C:plasmodesma; F:protein binding; P:regulation of innate immune response; P:jasmonic acid and ethylene-dependent systemic resistance; P:phosphorylation; F:protein serine/threonine kinase activity; C:plasma membrane	EC:2.7.11	Transferring phosphorus-containing groups
CotAD_66465	Leucine-rich repeat transmembrane kinase	979	20	0	64.95	7	C:GO:0009506; F:GO:0005515; P:GO:0045088; P:GO:0009861; P:GO:0016310; F:GO:0004674; C:GO:0005886	C:plasmodesma; F:protein binding; P:regulation of innate immune response; P:jasmonic acid and ethylene-dependent systemic resistance; P:phosphorylation; F:protein serine/threonine kinase activity; C:plasma membrane	EC:2.7.11	Transferring phosphorus-containing groups
CotAD_66533	Leucine-rich receptor kinase family	1128	20	0	59	14	C:GO:0043229; P:GO:0048608; P:GO:0048229; P:GO:0007169; P:GO:0000226; F:GO:0004674; P:GO:0006468; C:GO:0009504; C:GO:0005886; P:GO:0044702; C:GO:0043227; F:GO:0005524; C:GO:0016021; P:GO:0010103	C:intracellular organelle; P:reproductive structure development; P:gametophyte development; P:transmembrane receptor protein tyrosine kinase signaling pathway; P:microtubule cytoskeleton organization; F:protein serine/threonine kinase activity; P:protein phosphorylation; C:cell plate; C:plasma membrane; P:single organism reproductive process; C:membrane-bounded organelle; F:ATP binding; C:integra…	EC:2.7.11	Transferring phosphorus-containing groups
CotAD_66780	Leucine-rich receptor kinase family	789	20	0	69.35	10	F:GO:0005524; F:GO:0005515; P:GO:0010082; P:GO:0010449; C:GO:0016021; P:GO:0016032; P:GO:0007169; F:GO:0004674; P:GO:0006468; C:GO:0005886	F:ATP binding; F:protein binding; P:regulation of root meristem growth; P:root meristem growth; C:integral component of membrane; P:viral process; P:transmembrane receptor protein tyrosine kinase signaling pathway; F:protein serine/threonine kinase activity; P:protein phosphorylation; C:plasma membrane	EC:2.7.11	Transferring phosphorus-containing groups
CotAD_67251	Leucine-rich receptor kinase family	1118	20	0	57.35	12	C:GO:0043229; F:GO:0005524; P:GO:0048608; P:GO:0007169; P:GO:0000226; F:GO:0004674; P:GO:0006468; C:GO:0009504; C:GO:0005886; P:GO:0010103; P:GO:0044702; C:GO:0043227	C:intracellular organelle; F:ATP binding; P:reproductive structure development; P:transmembrane receptor protein tyrosine kinase signaling pathway; P:microtubule cytoskeleton organization; F:protein serine/threonine kinase activity; P:protein phosphorylation; C:cell plate; C:plasma membrane; P:stomatal complex morphogenesis; P:single organism reproductive process; C:membrane-bounded organelle	EC:2.7.11	Transferring phosphorus-containing groups
CotAD_67284	Leucine-rich repeat transmembrane kinase	1069	20	0	68.2	5	F:GO:0005524; C:GO:0009506; F:GO:0004672; P:GO:0016310; C:GO:0005886	F:ATP binding; C:plasmodesma; F:protein kinase activity; P:phosphorylation; C:plasma membrane
CotAD_67300	leucine-rich repeat receptor	970	20	0	51	17	P:GO:0009651; P:GO:0010073; P:GO:0044763; P:GO:0009945; P:GO:0048508; P:GO:0009856; P:GO:0044237; C:GO:0005886; P:GO:0009414; P:GO:0009942; C:GO:0005777; P:GO:0009409; F:GO:0004702; P:GO:0009738; P:GO:0048367; P:GO:0099402; P:GO:0071704	P:response to salt stress; P:meristem maintenance; P:single-organism cellular process; P:radial axis specification; P:embryonic meristem development; P:pollination; P:cellular metabolic process; C:plasma membrane; P:response to water deprivation; P:longitudinal axis specification; C:peroxisome; P:response to cold; F:signal transducer, downstream of receptor, with serine/threonine kinase activity;…	EC:2.7.11	Transferring phosphorus-containing groups
CotAD_67647	Leucine-rich repeat transmembrane kinase	915	20	0	61.5	7	C:GO:0009506; F:GO:0005515; P:GO:0045088; P:GO:0009861; P:GO:0016310; F:GO:0004674; C:GO:0005886	C:plasmodesma; F:protein binding; P:regulation of innate immune response; P:jasmonic acid and ethylene-dependent systemic resistance; P:phosphorylation; F:protein serine/threonine kinase activity; C:plasma membrane	EC:2.7.11	Transferring phosphorus-containing groups
CotAD_67655	Leucine-rich repeat transmembrane kinase	839	20	0	61.2	6	F:GO:0005524; C:GO:0009506; P:GO:0007169; F:GO:0004674; P:GO:0006468; C:GO:0005886	F:ATP binding; C:plasmodesma; P:transmembrane receptor protein tyrosine kinase signaling pathway; F:protein serine/threonine kinase activity; P:protein phosphorylation; C:plasma membrane	EC:2.7.11	Transferring phosphorus-containing groups
CotAD_67756	Leucine-rich repeat kinase family	782	20	0	59.9	7	F:GO:0005524; C:GO:0005739; C:GO:0016021; P:GO:0007169; F:GO:0004674; P:GO:0006468; C:GO:0005886	F:ATP binding; C:mitochondrion; C:integral component of membrane; P:transmembrane receptor protein tyrosine kinase signaling pathway; F:protein serine/threonine kinase activity; P:protein phosphorylation; C:plasma membrane	EC:2.7.11	Transferring phosphorus-containing groups
CotAD_68241	Leucine-rich receptor kinase family	1017	20	0	65.7	22	P:GO:0007172; P:GO:0010082; P:GO:0010183; P:GO:0007169; P:GO:0046777; P:GO:0048437; C:GO:0000325; P:GO:0009934; F:GO:0043621; C:GO:0005886; P:GO:0051301; F:GO:0005524; F:GO:0004702; C:GO:0009506; P:GO:0001944; C:GO:0016021; P:GO:0030154; P:GO:0010067; P:GO:0010089; F:GO:0033612; C:GO:0090406; P:GO:0010223	P:signal complex assembly; P:regulation of root meristem growth; P:pollen tube guidance; P:transmembrane receptor protein tyrosine kinase signaling pathway; P:protein autophosphorylation; P:floral organ development; C:plant-type vacuole; P:regulation of meristem structural organization; F:protein self-association; C:plasma membrane; P:cell division; F:ATP binding; F:signal transducer, downstream …	EC:2.7.11	Transferring phosphorus-containing groups
CotAD_68281	Leucine-rich repeat receptor kinase family	433	20	1.13e-139	59.35	13	P:GO:0010183; F:GO:0004672; P:GO:0044763; P:GO:0044238; C:GO:0005886; P:GO:0044767; C:GO:0005634; C:GO:0009506; F:GO:0005515; P:GO:0044260; P:GO:0016043; P:GO:0016310; C:GO:0090406	P:pollen tube guidance; F:protein kinase activity; P:single-organism cellular process; P:primary metabolic process; C:plasma membrane; P:single-organism developmental process; C:nucleus; C:plasmodesma; F:protein binding; P:cellular macromolecule metabolic process; P:cellular component organization; P:phosphorylation; C:pollen tube
CotAD_68282	Leucine-rich repeat receptor kinase family	784	20	3.89e-151	48.95	8	P:GO:0003006; C:GO:0016020; P:GO:0048856; C:GO:0044464; F:GO:0005488; P:GO:0044699; P:GO:0050896; P:GO:0032501	P:developmental process involved in reproduction; C:membrane; P:anatomical structure development; C:cell part; F:binding; P:single-organism process; P:response to stimulus; P:multicellular organismal process
CotAD_68316	Leucine-rich repeat kinase family	636	20	0	73.7	19	P:GO:0010152; F:GO:0042802; P:GO:0009793; P:GO:0007030; P:GO:0010150; P:GO:0009556; P:GO:0009742; P:GO:0046777; P:GO:0007166; C:GO:0043234; C:GO:0005576; C:GO:0005886; F:GO:0004675; F:GO:0005524; F:GO:0004713; C:GO:0016021; P:GO:0051607; P:GO:0010227; F:GO:0033612	P:pollen maturation; F:identical protein binding; P:embryo development ending in seed dormancy; P:Golgi organization; P:leaf senescence; P:microsporogenesis; P:brassinosteroid mediated signaling pathway; P:protein autophosphorylation; P:cell surface receptor signaling pathway; C:protein complex; C:extracellular region; C:plasma membrane; F:transmembrane receptor protein serine/threonine kinase ac…	EC:2.7.10; EC:2.7.11	Transferring phosphorus-containing groups; Transferring phosphorus-containing groups
CotAD_68332	leucine-rich repeat receptor	721	20	0	69.05	10	C:GO:0005634; F:GO:0005524; C:GO:0016021; C:GO:0005829; P:GO:0007169; C:GO:0005576; P:GO:0006468; P:GO:0007623; C:GO:0005886; F:GO:0004675	C:nucleus; F:ATP binding; C:integral component of membrane; C:cytosol; P:transmembrane receptor protein tyrosine kinase signaling pathway; C:extracellular region; P:protein phosphorylation; P:circadian rhythm; C:plasma membrane; F:transmembrane receptor protein serine/threonine kinase activity	EC:2.7.11	Transferring phosphorus-containing groups
CotAD_68390	Leucine-rich receptor kinase family	1060	20	0	55.8	11	P:GO:1901529; F:GO:0005524; P:GO:1901528; F:GO:0005515; C:GO:0016021; C:GO:0005829; P:GO:0007169; F:GO:0004674; P:GO:0006468; C:GO:0005886; P:GO:1901527	P:positive regulation of anion channel activity; F:ATP binding; P:hydrogen peroxide mediated signaling pathway involved in stomatal movement; F:protein binding; C:integral component of membrane; C:cytosol; P:transmembrane receptor protein tyrosine kinase signaling pathway; F:protein serine/threonine kinase activity; P:protein phosphorylation; C:plasma membrane; P:abscisic acid-activated signaling…	EC:2.7.11	Transferring phosphorus-containing groups
CotAD_68508	receptor kinase	1089	20	1.45e-178	51.95	10	P:GO:0009617; C:GO:0005768; P:GO:0051179; P:GO:0048856; P:GO:0051716; F:GO:0005488; P:GO:0006952; P:GO:0044699; P:GO:0050789; C:GO:0005886	P:response to bacterium; C:endosome; P:localization; P:anatomical structure development; P:cellular response to stimulus; F:binding; P:defense response; P:single-organism process; P:regulation of biological process; C:plasma membrane
CotAD_68701	Leucine-rich receptor kinase family	939	20	0	59.8	20	P:GO:1902025; P:GO:0010051; P:GO:0010183; P:GO:0046777; P:GO:0009960; F:GO:0004674; P:GO:0009845; C:GO:0005886; F:GO:0005524; P:GO:0006979; P:GO:0045490; F:GO:0005515; P:GO:0001944; C:GO:0016021; P:GO:0010468; F:GO:0017046; P:GO:0010227; P:GO:0090548; C:GO:0090406; P:GO:0010102	P:nitrate import; P:xylem and phloem pattern formation; P:pollen tube guidance; P:protein autophosphorylation; P:endosperm development; F:protein serine/threonine kinase activity; P:seed germination; C:plasma membrane; F:ATP binding; P:response to oxidative stress; P:pectin catabolic process; F:protein binding; P:vasculature development; C:integral component of membrane; P:regulation of gene expr…	EC:2.7.11	Transferring phosphorus-containing groups
CotAD_68703	Leucine-rich receptor kinase family	408	20	5.49e-105	51.75	10	P:GO:0006979; F:GO:0005515; P:GO:0050794; P:GO:0099402; P:GO:0046777; P:GO:0048316; F:GO:0004672; P:GO:0009845; C:GO:0005886; P:GO:0009888	P:response to oxidative stress; F:protein binding; P:regulation of cellular process; P:plant organ development; P:protein autophosphorylation; P:seed development; F:protein kinase activity; P:seed germination; C:plasma membrane; P:tissue development
CotAD_68984	Leucine-rich repeat kinase family	674	20	0	61.2	11	F:GO:0005524; C:GO:0009506; P:GO:2000605; C:GO:0016021; P:GO:0007169; C:GO:0005774; C:GO:0009505; F:GO:0004674; P:GO:0006468; P:GO:0009834; C:GO:0005886	F:ATP binding; C:plasmodesma; P:positive regulation of secondary growth; C:integral component of membrane; P:transmembrane receptor protein tyrosine kinase signaling pathway; C:vacuolar membrane; C:plant-type cell wall; F:protein serine/threonine kinase activity; P:protein phosphorylation; P:plant-type secondary cell wall biogenesis; C:plasma membrane	EC:2.7.11	Transferring phosphorus-containing groups
CotAD_69004	Leucine-rich repeat kinase family	441	20	1.35e-76	53.2	8	C:GO:0009507; P:GO:0009605; P:GO:0007165; F:GO:0005488; F:GO:0016301; C:GO:0005886; P:GO:0002376; P:GO:0050776	C:chloroplast; P:response to external stimulus; P:signal transduction; F:binding; F:kinase activity; C:plasma membrane; P:immune system process; P:regulation of immune response
CotAD_69015	Leucine-rich repeat receptor kinase family	1209	20	0	55.4	7	C:GO:0009506; F:GO:0005515; P:GO:0007275; P:GO:0010183; F:GO:0016301; C:GO:0005886; C:GO:0090406	C:plasmodesma; F:protein binding; P:multicellular organism development; P:pollen tube guidance; F:kinase activity; C:plasma membrane; C:pollen tube
CotAD_69140	Leucine-rich repeat kinase family	709	20	0	63.2	5	F:GO:0005524; P:GO:0007169; F:GO:0004674; P:GO:0006468; C:GO:0005886	F:ATP binding; P:transmembrane receptor protein tyrosine kinase signaling pathway; F:protein serine/threonine kinase activity; P:protein phosphorylation; C:plasma membrane	EC:2.7.11	Transferring phosphorus-containing groups
CotAD_69284	Leucine-rich repeat kinase family	716	20	0	58.65	11	C:GO:0009570; F:GO:0005524; F:GO:0005515; C:GO:0016021; P:GO:0007169; P:GO:0046777; C:GO:0009505; F:GO:0004674; C:GO:0005886; C:GO:0090406; P:GO:0010069	C:chloroplast stroma; F:ATP binding; F:protein binding; C:integral component of membrane; P:transmembrane receptor protein tyrosine kinase signaling pathway; P:protein autophosphorylation; C:plant-type cell wall; F:protein serine/threonine kinase activity; C:plasma membrane; C:pollen tube; P:zygote asymmetric cytokinesis in embryo sac	EC:2.7.11	Transferring phosphorus-containing groups
CotAD_69381	Leucine-rich repeat kinase family	900	20	0	57.1	8	F:GO:0005524; C:GO:0009506; P:GO:0048856; P:GO:0007169; C:GO:0009505; F:GO:0004674; P:GO:0006468; C:GO:0005886	F:ATP binding; C:plasmodesma; P:anatomical structure development; P:transmembrane receptor protein tyrosine kinase signaling pathway; C:plant-type cell wall; F:protein serine/threonine kinase activity; P:protein phosphorylation; C:plasma membrane	EC:2.7.11	Transferring phosphorus-containing groups
CotAD_69592	leucine-rich repeat receptor	647	20	0	82.05	30	P:GO:0009793; P:GO:0007030; P:GO:0009556; P:GO:0046777; P:GO:0060548; F:GO:0008289; C:GO:0005789; F:GO:0005524; P:GO:0008219; F:GO:0004714; F:GO:0046982; P:GO:0051607; P:GO:0050832; F:GO:0033612; P:GO:0010152; F:GO:0042802; P:GO:1900140; P:GO:0010150; P:GO:0009742; P:GO:0007166; C:GO:0043234; P:GO:0042742; C:GO:0005886; F:GO:0004675; P:GO:0002229; C:GO:0016021; C:GO:0010008; P:GO:0010227; P:GO:00…	P:embryo development ending in seed dormancy; P:Golgi organization; P:microsporogenesis; P:protein autophosphorylation; P:negative regulation of cell death; F:lipid binding; C:endoplasmic reticulum membrane; F:ATP binding; P:cell death; F:transmembrane receptor protein tyrosine kinase activity; F:protein heterodimerization activity; P:defense response to virus; P:defense response to fungus; F:rec…	EC:2.7.10; EC:2.7.10.1; EC:2.7.11	Transferring phosphorus-containing groups; Receptor protein-tyrosine kinase; Transferring phosphorus-containing groups
CotAD_69673	Leucine-rich repeat kinase family	954	20	0	71.85	8	F:GO:0005524; C:GO:0009507; C:GO:0016021; P:GO:0007169; C:GO:0005576; F:GO:0004674; P:GO:0006468; C:GO:0005886	F:ATP binding; C:chloroplast; C:integral component of membrane; P:transmembrane receptor protein tyrosine kinase signaling pathway; C:extracellular region; F:protein serine/threonine kinase activity; P:protein phosphorylation; C:plasma membrane	EC:2.7.11	Transferring phosphorus-containing groups
CotAD_69922	Leucine-rich receptor kinase family	1060	20	0	55.8	11	P:GO:1901529; F:GO:0005524; P:GO:1901528; F:GO:0005515; C:GO:0016021; C:GO:0005829; P:GO:0007169; F:GO:0004674; P:GO:0006468; C:GO:0005886; P:GO:1901527	P:positive regulation of anion channel activity; F:ATP binding; P:hydrogen peroxide mediated signaling pathway involved in stomatal movement; F:protein binding; C:integral component of membrane; C:cytosol; P:transmembrane receptor protein tyrosine kinase signaling pathway; F:protein serine/threonine kinase activity; P:protein phosphorylation; C:plasma membrane; P:abscisic acid-activated signaling…	EC:2.7.11	Transferring phosphorus-containing groups
CotAD_69974	Leucine-rich repeat kinase family	906	20	0	60.45	8	F:GO:0005524; C:GO:0009506; P:GO:0048856; P:GO:0007169; C:GO:0009505; F:GO:0004674; P:GO:0006468; C:GO:0005886	F:ATP binding; C:plasmodesma; P:anatomical structure development; P:transmembrane receptor protein tyrosine kinase signaling pathway; C:plant-type cell wall; F:protein serine/threonine kinase activity; P:protein phosphorylation; C:plasma membrane	EC:2.7.11	Transferring phosphorus-containing groups
CotAD_70056	leucine-rich repeat receptor	1012	20	0	63.35	19	P:GO:0048608; P:GO:0009791; P:GO:0009611; F:GO:0004383; P:GO:0007169; P:GO:0045851; F:GO:0004674; P:GO:0006468; C:GO:0005886; P:GO:0044702; F:GO:0001653; F:GO:0005524; C:GO:0009507; P:GO:0009826; F:GO:0004888; F:GO:0005515; P:GO:0045087; C:GO:0016021; P:GO:0031347	P:reproductive structure development; P:post-embryonic development; P:response to wounding; F:guanylate cyclase activity; P:transmembrane receptor protein tyrosine kinase signaling pathway; P:pH reduction; F:protein serine/threonine kinase activity; P:protein phosphorylation; C:plasma membrane; P:single organism reproductive process; F:peptide receptor activity; F:ATP binding; C:chloroplast; P:un…	EC:2.7.11; EC:4.6.1.2	Transferring phosphorus-containing groups; Guanylate cyclase
[truncated: 47 more rows]
[truncated: 5,000 more columns]

## Sheet: Table S4
Table S4 Motif composition for each subclade
										the number of proteins containing this Motif
							extracellular domians							intracellular domain
		The total number of proteins in subclade	LRR_1	LRRNT_2	LRR_3	LRR_4	LRR_5	LRR_6	LRR_8	LRR_9	Signal peptide	MALECTIN_Like	Transmembrane domain	protein kinasdomain
	Subclade I	13	8	1	1	5	0	2	7	0	9	9	13	13
	Subclade II	28	26	26	0	10	0	7	11	0	24	0	28	28
	Subclade III	89	82	55	3	37	4	6	38	6	71	1	89	89
	Subclade IV-1	5	5	5	0	1	0	0	5	0	5	0	5	5
	Subclade IV-2	7	7	4	0	0	0	0	1	3	4	0	7	7
	Subclade V	18	18	5	0	13	1	8	4	0	14	0	18	18
	Subclade VI-1	7	6	2	0	5	0	1	6	1	4	0	7	7
	Subclade VI-2	23	20	10	3	1	3	5	19	1	19	0	23	23
	Subclade VII	17	17	10	3	2	0	3	16	0	13	0	17	17
	Subclade VIII-1	31	31	8	0	19	1	1	18	3	19	0	31	31
[truncated: 16 more rows]

## Sheet: Table S5
Table S5 List of SRA datasets
[truncated: 11 more rows]

## Sheet: Table S6
	Table S6 Gene expression analysis
[truncated: 544 more rows]
